# Supplementary material for: Acidocalcisome-like vacuoles constitute a feedback-controlled phosphate buffering system for the cytosol
Source: eLife. 2025 Dec 1;14:RP108181. doi: 10.7554/eLife.108181 (PMC12668673; doi:10.7554/eLife.108181)
Supplement: Supplementary file 1. [file elife-108181-supp1.xlsx]

## Sheet: Tabelle1
Enrichment of marker proteins in the vacuolar fraction of BY4742 cells over a total extract of spheroblasts, based on LFQ values
		Sample 1		Sample 2		Sample 3		Average	STD
Pho91		18.5868		46.1877		53.5821		39.4522	18.4443
Vam3		69.2007		132.671		105.617		102.496	31.8501
Vtc3		32.5781		34.248		38.33		35.052	2.95902
Avt3		27.4078		47.5195		71.0482		48.6585	21.8425
Vvc1		15.0344		37.8218		23.1832		25.3465	11.5467
Vba4		15.4247		36.195		49.8689		33.8295	17.3435
Pho8		40.4592		27.3867		34.6438		34.1632	6.54948
Vma9		13.0695		48.8257		75.4679		45.7877	31.31
FTR1		3.78351		1.94336		1.83691		2.52126	1.09443
TPQ5		2.60061		1.79409		2.3458		2.24683	0.412266
Pho87		2.31445		2.2372		2.48222		2.34463	0.125264

## Sheet: Primary analysis
LFQ intensity 14371 Bj sphero	LFQ intensity 14370 Bj vac	LFQ intensity 14392 By sphero 1	LFQ intensity 14393 By vac 1	LFQ intensity 14394 By sphero 2	LFQ intensity 14395 By vac 2	Bj sphero - Bj vac	enrich Bj	By sphero 1 - By vac 1	enrich By 1	By sphero 2 - By vac 2	enrich By 2	Student's T-test Significant vac_sphe	Student's T-test significant	Peptides	Razor + unique peptides	Unique peptides	Sequence coverage [%]	Unique + razor sequence coverage [%]	Unique sequence coverage [%]	Mol. weight [kDa]	Q-value	Score	Intensity	MS/MS count	Razor + unique peptides 14370	Razor + unique peptides 14371	Razor + unique peptides 14392	Razor + unique peptides 14393	Razor + unique peptides 14394	Razor + unique peptides 14395	iBAQ	iBAQ 14371	iBAQ 14370	iBAQ 14392	iBAQ 14393	iBAQ 14394	iBAQ 14395	-Log Student's T-test p-value vac_sphe	Student's T-test Difference vac_sphe	Student's T-test Test statistic vac_sphe	Protein IDs	Majority protein IDs	Protein names	Gene names	Fasta headers
22.823881149292	NaN	22.4325485229492	NaN	NaN	23.0245704650879	#VALUE!	#VALUE!	#VALUE!	#VALUE!	#VALUE!	#VALUE!			1	1	1	22.2	22.2	22.2	7.9021	0	6.1542	25.1271130285379	4	0	1	1	0	0	1	23.5421505278167	22.8607730865479	NaN	21.3786716461182	NaN	NaN	20.8357639312744	0	-0.396355628967285	0	A5Z2X5	A5Z2X5	UPF0495 protein YPR010C-A	YPR010C-A	sp|A5Z2X5|YP010_YEAST UPF0495 protein YPR010C-A OS=Saccharomyces cerevisiae (strain ATCC 204508 / S288c) OX=559292 GN=YPR010C-A PE=3 SV=1
NaN	NaN	19.4383335113525	NaN	19.1145668029785	18.5212173461914	#VALUE!	#VALUE!	#VALUE!	#VALUE!	0.593349	1.50875			1	1	1	6.6	6.6	6.6	38.627	0	9.9426	20.90382007715	2	0	0	1	0	1	1	17.0964063254087	NaN	NaN	16.1620178222656	NaN	15.5841693878174	14.1100749969482	0	0.755232810974121	0	O13525	O13525	Ubiquinone biosynthesis protein COQ4, mitochondrial	COQ4	sp|O13525|COQ4_YEAST Ubiquinone biosynthesis protein COQ4, mitochondrial OS=Saccharomyces cerevisiae (strain ATCC 204508 / S288c) OX=559292 GN=COQ4 PE=1 SV=2
22.0188274383545	22.4196720123291	NaN	22.7690467834473	NaN	NaN	-0.400845	0.757415	#VALUE!	#VALUE!	#VALUE!	#VALUE!			2	2	2	9.6	9.6	9.6	30.299	0	3.387	24.4525564697069	5	1	1	0	1	0	1	20.7521356028086	19.9401988983154	18.7192344665527	NaN	18.3254890441895	NaN	NaN	0	-0.575531959533691	0	O13539	O13539	THO complex subunit THP2	THP2	sp|O13539|THP2_YEAST THO complex subunit THP2 OS=Saccharomyces cerevisiae (strain ATCC 204508 / S288c) OX=559292 GN=THP2 PE=1 SV=1
21.2139492034912	NaN	NaN	22.6571578979492	23.0174865722656	NaN	#VALUE!	#VALUE!	#VALUE!	#VALUE!	#VALUE!	#VALUE!			1	1	1	24.4	24.4	24.4	9.7119	0.001296	2.1893	24.3729192468594	3	0	1	0	1	1	0	21.7879567461383	20.2508392333984	NaN	NaN	19.329065322876	20.7094402313232	NaN	0	-0.541440010070801	0	O60200	O60200	Mitochondrial distribution and morphology protein 35	MDM35	sp|O60200|MDM35_YEAST Mitochondrial distribution and morphology protein 35 OS=Saccharomyces cerevisiae (strain ATCC 204508 / S288c) OX=559292 GN=MDM35 PE=1 SV=3
20.7227573394775	NaN	NaN	NaN	NaN	19.1309432983398	#VALUE!	#VALUE!	#VALUE!	#VALUE!	#VALUE!	#VALUE!			1	1	1	8.2	8.2	8.2	17.257	0.0078961	1.6284	22.4434666710403	2	0	1	0	1	0	1	19.8584940526756	19.7596321105957	NaN	NaN	NaN	NaN	15.9421482086182	0	1.5918140411377	0	P00127	P00127	Cytochrome b-c1 complex subunit 6	QCR6	sp|P00127|QCR6_YEAST Cytochrome b-c1 complex subunit 6, mitochondrial OS=Saccharomyces cerevisiae (strain ATCC 204508 / S288c) OX=559292 GN=QCR6 PE=1 SV=2
20.4864025115967	21.4904727935791	NaN	NaN	NaN	21.4047317504883	-1.00407	0.498591	#VALUE!	#VALUE!	#VALUE!	#VALUE!			1	1	1	3.2	3.2	3.2	58.797	0	2.9454	23.1478992595681	2	1	1	0	0	0	1	20.1479303042953	19.1082496643066	18.4904441833496	NaN	NaN	NaN	17.8008880615234	0	-0.961199760437012	0	P00401	P00401	Cytochrome c oxidase subunit 1	COX1	sp|P00401|COX1_YEAST Cytochrome c oxidase subunit 1 OS=Saccharomyces cerevisiae (strain ATCC 204508 / S288c) OX=559292 GN=COX1 PE=1 SV=2
22.1903285980225	23.0429668426514	NaN	22.7753505706787	NaN	22.8324069976807	-0.852638	0.553771	#VALUE!	#VALUE!	#VALUE!	#VALUE!			3	3	3	12	12	12	24.687	0	3.915	24.7209326672879	6	1	1	1	2	1	3	21.5509815799221	19.8236560821533	19.0544395446777	16.5147132873535	19.553524017334	16.4332427978516	19.3067684173584	0	-0.693246205647785	0	P00572	P00572	Thymidylate kinase	CDC8	sp|P00572|KTHY_YEAST Thymidylate kinase OS=Saccharomyces cerevisiae (strain ATCC 204508 / S288c) OX=559292 GN=CDC8 PE=1 SV=2
NaN	NaN	NaN	NaN	21.1359596252441	NaN	#VALUE!	#VALUE!	#VALUE!	#VALUE!	#VALUE!	#VALUE!			1	1	1	6.6	6.6	6.6	29.099	0	3.8253	21.4129191824049	1	0	0	0	0	1	0	19.8279256789859	NaN	NaN	NaN	NaN	19.8279247283936	NaN	0	NaN	0	P00854	P00854	ATP synthase subunit a	ATP6	sp|P00854|ATP6_YEAST ATP synthase subunit a OS=Saccharomyces cerevisiae (strain ATCC 204508 / S288c) OX=559292 GN=ATP6 PE=1 SV=2
20.7509918212891	NaN	NaN	NaN	NaN	NaN	#VALUE!	#VALUE!	#VALUE!	#VALUE!	#VALUE!	#VALUE!			2	2	2	29.1	29.1	29.1	10.062	0.0091209	1.5251	22.5900085797243	2	0	1	0	1	0	0	21.0050460790031	20.7878761291504	NaN	NaN	18.1660461425781	NaN	NaN	0	NaN	0	P01098	P01098	ATPase-stabilizing factor 9 kDa, mitochondrial	STF1	sp|P01098|STF1_YEAST ATPase-stabilizing factor 9 kDa, mitochondrial OS=Saccharomyces cerevisiae (strain ATCC 204508 / S288c) OX=559292 GN=STF1 PE=1 SV=2
25.0320415496826	NaN	NaN	NaN	NaN	NaN	#VALUE!	#VALUE!	#VALUE!	#VALUE!	#VALUE!	#VALUE!			3	3	3	35.8	35.8	35.8	18.642	0	30.015	26.6538979684776	4	0	3	0	0	0	0	23.6539252945762	23.6539249420166	NaN	NaN	NaN	NaN	NaN	0	NaN	0	P01149	P01149	Mating factor alpha-1;Mating factor alpha	MF(ALPHA)1	sp|P01149|MFAL1_YEAST Mating factor alpha-1 OS=Saccharomyces cerevisiae (strain ATCC 204508 / S288c) OX=559292 GN=MF(ALPHA)1 PE=1 SV=1
22.7005157470703	22.5259971618652	22.1265697479248	NaN	22.5020313262939	NaN	0.174519	1.12859	#VALUE!	#VALUE!	#VALUE!	#VALUE!			6	6	6	22.1	22.1	22.1	47.123	0	6.6306	25.518693491196	6	2	5	1	0	1	1	21.0592678747722	20.5581474304199	18.1541748046875	17.1451950073242	NaN	17.6419525146484	NaN	0	-0.0829582214355469	0	P02381	P02381	Ribosomal protein VAR1, mitochondrial	VAR1	sp|P02381|RMAR_YEAST Ribosomal protein VAR1, mitochondrial OS=Saccharomyces cerevisiae (strain ATCC 204508 / S288c) OX=559292 GN=VAR1 PE=1 SV=3
23.7177467346191	NaN	21.0279655456543	NaN	20.9330101013184	NaN	#VALUE!	#VALUE!	#VALUE!	#VALUE!	#VALUE!	#VALUE!			3	3	3	9.3	9.3	9.3	71.735	0	3.1689	25.3307738498252	4	0	2	1	0	2	0	20.9384769386664	20.5837116241455	NaN	17.0464420318604	NaN	18.2073860168457	NaN	0	NaN	0	P05316	P05316	Uracil permease	FUR4	sp|P05316|FUR4_YEAST Uracil permease OS=Saccharomyces cerevisiae (strain ATCC 204508 / S288c) OX=559292 GN=FUR4 PE=3 SV=2
NaN	NaN	24.4373950958252	25.0907936096191	NaN	25.1661472320557	#VALUE!	#VALUE!	-0.653399	0.635781	#VALUE!	#VALUE!			12	1	1	52.8	7.9	7.9	14.234	0.0010398	2.2653	26.2344724768903	3	0	0	1	1	0	1	23.6495465218366	NaN	NaN	22.3835048675537	21.762716293335	NaN	21.9773616790771	0	-0.691075325012207	0	P05743	P05743	60S ribosomal protein L26-A	RPL26A	sp|P05743|RL26A_YEAST 60S ribosomal protein L26-A OS=Saccharomyces cerevisiae (strain ATCC 204508 / S288c) OX=559292 GN=RPL26A PE=1 SV=3
27.1896171569824	31.921459197998	NaN	NaN	NaN	21.9701805114746	-4.73184	0.0376334	#VALUE!	#VALUE!	#VALUE!	#VALUE!			24	24	24	65.8	65.8	65.8	48.671	0	318.76	32.6402429569119	71	23	22	0	0	0	1	28.1808242692608	27.3092136383057	27.0396747589111	NaN	NaN	NaN	14.5372791290283	0	0.243797302246094	0	P06106	P06106	Protein MET17;O-acetylhomoserine sulfhydrylase;O-acetylserine sulfhydrylase	MET17	sp|P06106|CYSD_YEAST Homocysteine/cysteine synthase OS=Saccharomyces cerevisiae (strain ATCC 204508 / S288c) OX=559292 GN=MET17 PE=1 SV=3
NaN	NaN	21.9803276062012	NaN	21.9099464416504	NaN	#VALUE!	#VALUE!	#VALUE!	#VALUE!	#VALUE!	#VALUE!			5	5	5	6.1	6.1	6.1	111.36	0	5.5517	24.8402373924681	5	2	2	1	0	2	1	19.0853739054032	17.4317588806152	17.4054069519043	16.0340461730957	NaN	16.931453704834	13.7485074996948	0	NaN	0	P06701	P06701	Regulatory protein SIR3	SIR3	sp|P06701|SIR3_YEAST Regulatory protein SIR3 OS=Saccharomyces cerevisiae (strain ATCC 204508 / S288c) OX=559292 GN=SIR3 PE=1 SV=6
NaN	NaN	NaN	NaN	20.8832302093506	21.1738357543945	#VALUE!	#VALUE!	#VALUE!	#VALUE!	-0.290606	0.817559			1	1	1	1.9	1.9	1.9	126.37	0	3.6101	21.8950796850053	2	0	0	1	0	1	1	16.1137218210411	NaN	NaN	NaN	NaN	15.3788709640503	14.7886161804199	0	-0.290605545043945	0	P06777	P06777	DNA repair protein RAD1	RAD1	sp|P06777|RAD1_YEAST DNA repair protein RAD1 OS=Saccharomyces cerevisiae (strain ATCC 204508 / S288c) OX=559292 GN=RAD1 PE=1 SV=1
28.5778388977051	24.6876316070557	NaN	NaN	NaN	NaN	3.89021	14.8275	#VALUE!	#VALUE!	#VALUE!	#VALUE!			10	10	10	25.1	25.1	25.1	53.708	0	110.85	30.2348926961837	21	3	10	0	0	0	0	26.427519506267	26.3982601165771	20.7893905639648	NaN	NaN	NaN	NaN	0	3.89020729064941	0	P06783	P06783	Pheromone a factor receptor	STE3	sp|P06783|STE3_YEAST Pheromone a factor receptor OS=Saccharomyces cerevisiae (strain ATCC 204508 / S288c) OX=559292 GN=STE3 PE=1 SV=1
NaN	21.075288772583	20.8584022521973	NaN	NaN	22.8129978179932	#VALUE!	#VALUE!	#VALUE!	#VALUE!	#VALUE!	#VALUE!			1	1	1	4.2	4.2	4.2	87.728	0.0048606	1.8205	23.2251450540247	3	1	0	1	0	0	1	17.8676165904476	NaN	15.7177562713623	16.0319385528564	NaN	NaN	16.8516025543213	0	-1.08574104309082	0	P07261	P07261	Glycolytic genes transcriptional activator GCR1	GCR1	sp|P07261|GCR1_YEAST Glycolytic genes transcriptional activator GCR1 OS=Saccharomyces cerevisiae (strain ATCC 204508 / S288c) OX=559292 GN=GCR1 PE=1 SV=2
22.1344566345215	22.7961616516113	22.8008289337158	NaN	22.5088405609131	NaN	-0.661705	0.632131	#VALUE!	#VALUE!	#VALUE!	#VALUE!			4	4	4	7	7	7	97.681	0.00026364	2.6651	25.4617641931802	3	1	1	1	1	1	3	19.9698642675057	17.7512702941895	17.4528198242188	17.9932479858398	16.3531131744385	17.237154006958	16.9633026123047	0	-0.314786275227863	0	P07271	P07271	ATP-dependent DNA helicase PIF1	PIF1	sp|P07271|PIF1_YEAST ATP-dependent DNA helicase PIF1 OS=Saccharomyces cerevisiae (strain ATCC 204508 / S288c) OX=559292 GN=PIF1 PE=1 SV=2
NaN	NaN	22.712215423584	NaN	22.6696662902832	NaN	#VALUE!	#VALUE!	#VALUE!	#VALUE!	#VALUE!	#VALUE!			2	2	2	6.9	6.9	6.9	50.367	0	7.0115	24.1002908236848	3	0	0	2	0	2	0	20.399891213272	NaN	NaN	19.5172233581543	NaN	19.2720966339111	NaN	0	NaN	0	P07286	P07286	UDP-N-acetylglucosamine--dolichyl-phosphate N-acetylglucosaminephosphotransferase	ALG7	sp|P07286|GPT_YEAST UDP-N-acetylglucosamine--dolichyl-phosphate N-acetylglucosaminephosphotransferase OS=Saccharomyces cerevisiae (strain ATCC 204508 / S288c) OX=559292 GN=ALG7 PE=3 SV=1
NaN	22.3846645355225	NaN	22.8674430847168	NaN	22.7142505645752	#VALUE!	#VALUE!	#VALUE!	#VALUE!	#VALUE!	#VALUE!			1	1	1	4.1	4.1	4.1	86.089	0	3.7339	23.7970915284641	4	1	0	0	1	0	1	18.5875797649687	NaN	17.1752376556396	NaN	16.914852142334	NaN	16.901008605957	0	NaN	0	P07834	P07834	Cell division control protein 4	CDC4	sp|P07834|CDC4_YEAST Cell division control protein 4 OS=Saccharomyces cerevisiae (strain ATCC 204508 / S288c) OX=559292 GN=CDC4 PE=1 SV=2
NaN	NaN	NaN	NaN	NaN	20.7574348449707	#VALUE!	#VALUE!	#VALUE!	#VALUE!	#VALUE!	#VALUE!			2	2	2	5.2	5.2	5.2	52.285	0.00026089	2.3581	20.1536311941017	1	0	0	0	0	0	2	15.8317030992143	NaN	NaN	NaN	NaN	NaN	15.8317031860352	0	NaN	0	P08432	P08432	Ornithine decarboxylase	SPE1	sp|P08432|DCOR_YEAST Ornithine decarboxylase OS=Saccharomyces cerevisiae (strain ATCC 204508 / S288c) OX=559292 GN=SPE1 PE=1 SV=1
NaN	NaN	NaN	22.7019748687744	NaN	NaN	#VALUE!	#VALUE!	#VALUE!	#VALUE!	#VALUE!	#VALUE!			18	2	2	24.5	6.3	6.3	70.546	0.0051112	1.7698	21.9588288015407	2	0	0	0	1	1	0	16.8713518033135	NaN	NaN	NaN	16.8713512420654	NaN	NaN	0	NaN	0	P09435	P09435	Heat shock protein SSA3	SSA3	sp|P09435|HSP73_YEAST Heat shock protein SSA3 OS=Saccharomyces cerevisiae (strain ATCC 204508 / S288c) OX=559292 GN=SSA3 PE=1 SV=3
NaN	NaN	21.5400466918945	NaN	21.1095504760742	NaN	#VALUE!	#VALUE!	#VALUE!	#VALUE!	#VALUE!	#VALUE!			1	1	1	23.7	23.7	23.7	6.873	0	3.2733	22.7690274686499	1	0	0	1	0	1	0	22.7690274686499	NaN	NaN	22.0711040496826	NaN	21.3865337371826	NaN	0	NaN	0	P0C268	P0C268	Uncharacterized protein YBL039W-B	YBL039W-B	sp|P0C268|YB39B_YEAST Uncharacterized protein YBL039W-B OS=Saccharomyces cerevisiae (strain ATCC 204508 / S288c) OX=559292 GN=YBL039W-B PE=4 SV=1
NaN	NaN	21.9523010253906	NaN	21.7971706390381	NaN	#VALUE!	#VALUE!	#VALUE!	#VALUE!	#VALUE!	#VALUE!			18	1	1	55.9	5.5	5.5	49.003	0	3.1144	23.3203091741114	4	0	0	1	0	1	0	19.5130258753877	NaN	NaN	18.9466667175293	NaN	17.8900623321533	NaN	0	NaN	0	P0C2I8;Q6Q5H1	P0C2I8;Q6Q5H1	Transposon Ty1-LR4 Gag polyprotein;Capsid protein;Gag-p4;Transposon Ty1-PR3 Gag polyprotein;Capsid protein;Gag-p4	TY1A-LR4;TY1A-PR3	sp|P0C2I8|YL14A_YEAST Transposon Ty1-LR4 Gag polyprotein OS=Saccharomyces cerevisiae (strain ATCC 204508 / S288c) OX=559292 GN=TY1A-LR4 PE=2 SV=1;sp|Q6Q5H1|YP14A_YEAST Transposon Ty1-PR3 Gag polyprotein OS=Saccharomyces cerevisiae (strain ATCC 204508 / S28
27.434440612793	NaN	22.9102039337158	NaN	22.0444355010986	NaN	#VALUE!	#VALUE!	#VALUE!	#VALUE!	#VALUE!	#VALUE!			11	4	3	25.3	12.4	10	45.165	0	31.132	29.1236394136367	8	0	4	1	0	1	0	25.1236443466779	25.1021747589111	NaN	18.4974384307861	NaN	17.3775501251221	NaN	0	NaN	0	P0CX13;P0CX12	P0CX13;P0CX12	Protein COS3;Protein COS2	COS3;COS2	sp|P0CX13|COS3_YEAST Protein COS3 OS=Saccharomyces cerevisiae (strain ATCC 204508 / S288c) OX=559292 GN=COS3 PE=1 SV=1;sp|P0CX12|COS2_YEAST Protein COS2 OS=Saccharomyces cerevisiae (strain ATCC 204508 / S288c) OX=559292 GN=COS2 PE=1 SV=1
NaN	NaN	19.1080703735352	20.4258308410645	18.2448844909668	NaN	#VALUE!	#VALUE!	-1.31776	0.401157	#VALUE!	#VALUE!			1	1	1	9.1	9.1	9.1	29.155	0.00026157	2.4213	21.0630922057306	1	0	0	1	1	1	0	17.2558031315947	NaN	NaN	16.3327713012695	15.6948471069336	14.3523197174072	NaN	0	-1.74935340881348	0	P10355	P10355	Protein PET122, mitochondrial	PET122	sp|P10355|PT122_YEAST Protein PET122, mitochondrial OS=Saccharomyces cerevisiae (strain ATCC 204508 / S288c) OX=559292 GN=PET122 PE=1 SV=2
NaN	NaN	20.8488101959229	NaN	20.5709857940674	NaN	#VALUE!	#VALUE!	#VALUE!	#VALUE!	#VALUE!	#VALUE!			3	3	3	14	14	14	34.637	0	7.8047	22.4309425143263	6	0	0	1	0	3	2	18.0386404001998	NaN	NaN	16.9875965118408	NaN	16.4556636810303	15.5932159423828	0	NaN	0	P10834	P10834	Protein PET54	PET54	sp|P10834|PET54_YEAST Protein PET54 OS=Saccharomyces cerevisiae (strain ATCC 204508 / S288c) OX=559292 GN=PET54 PE=1 SV=1
21.9498825073242	20.9532623291016	23.3187923431396	NaN	23.7720317840576	NaN	0.99662	1.99532	#VALUE!	#VALUE!	#VALUE!	#VALUE!			5	5	5	11.4	11.4	11.4	51.192	0	3.9549	25.7661028247164	7	2	4	2	0	1	1	21.1222466349417	20.2359619140625	16.6408939361572	18.4879741668701	NaN	19.1403846740723	NaN	0	2.06030654907227	0	P10849	P10849	Mitochondrial transcription factor 2	MTF2	sp|P10849|MTF2_YEAST Mitochondrial transcription factor 2 OS=Saccharomyces cerevisiae (strain ATCC 204508 / S288c) OX=559292 GN=MTF2 PE=1 SV=1
NaN	20.9954166412354	21.9217967987061	NaN	21.3774013519287	NaN	#VALUE!	#VALUE!	#VALUE!	#VALUE!	#VALUE!	#VALUE!			2	2	2	3.6	3.6	3.6	101.92	0	5.6918	23.4795118806145	3	1	0	2	0	1	0	17.807065569086	NaN	13.3363666534424	17.1036968231201	NaN	16.253791809082	NaN	0	0.654182434082031	0	P11325	P11325	Leucine--tRNA ligase, mitochondrial	NAM2	sp|P11325|SYLM_YEAST Leucine--tRNA ligase, mitochondrial OS=Saccharomyces cerevisiae (strain ATCC 204508 / S288c) OX=559292 GN=NAM2 PE=1 SV=1
25.2250499725342	NaN	20.227409362793	NaN	19.7993392944336	NaN	#VALUE!	#VALUE!	#VALUE!	#VALUE!	#VALUE!	#VALUE!			9	9	9	25	25	25	57.779	0	13.193	26.8808700376525	11	0	9	1	0	1	0	22.3573501080277	22.323335647583	NaN	16.2349300384521	NaN	15.5527286529541	NaN	0	NaN	0	P11710	P11710	Nuclear fusion protein FUS1	FUS1	sp|P11710|FUS1_YEAST Nuclear fusion protein FUS1 OS=Saccharomyces cerevisiae (strain ATCC 204508 / S288c) OX=559292 GN=FUS1 PE=1 SV=3
27.1493816375732	23.732105255127	NaN	NaN	21.8787117004395	NaN	3.41728	10.6832	#VALUE!	#VALUE!	#VALUE!	#VALUE!			11	11	11	33.1	33.1	33.1	55.345	0	41.253	28.7262118696673	19	7	11	0	0	1	0	24.1412558665334	24.0267333984375	20.3000583648682	NaN	NaN	16.8819026947021	NaN	0	0.781941413879395	0	P12611	P12611	Growth regulation protein	WHI2	sp|P12611|WHI2_YEAST Growth regulation protein OS=Saccharomyces cerevisiae (strain ATCC 204508 / S288c) OX=559292 GN=WHI2 PE=1 SV=2
24.2886981964111	22.0473003387451	22.347354888916	NaN	NaN	NaN	2.2414	4.72855	#VALUE!	#VALUE!	#VALUE!	#VALUE!			3	3	3	4.2	4.2	4.2	141.07	0	7.7422	26.2153422133868	5	1	3	1	0	1	0	20.6917469263786	20.4905223846436	16.2763061523438	17.1073799133301	NaN	NaN	NaN	0	1.27072620391846	0	P12685;P28584	P12685	High-affinity potassium transport protein	TRK1	sp|P12685|TRK1_YEAST High-affinity potassium transport protein OS=Saccharomyces cerevisiae (strain ATCC 204508 / S288c) OX=559292 GN=TRK1 PE=1 SV=1
22.3699684143066	21.8211975097656	NaN	NaN	NaN	NaN	0.548771	1.46284	#VALUE!	#VALUE!	#VALUE!	#VALUE!			2	2	2	16	16	16	15.52	0	3.4664	24.3778247992137	5	2	2	1	0	1	0	22.0558636146111	21.6563053131104	19.5189151763916	18.2112426757813	NaN	NaN	NaN	0	0.548770904541016	0	P14063	P14063	54S ribosomal protein L31, mitochondrial	MRPL31	sp|P14063|RM31_YEAST 54S ribosomal protein L31, mitochondrial OS=Saccharomyces cerevisiae (strain ATCC 204508 / S288c) OX=559292 GN=MRPL31 PE=1 SV=1
NaN	NaN	NaN	NaN	22.0236740112305	NaN	#VALUE!	#VALUE!	#VALUE!	#VALUE!	#VALUE!	#VALUE!			2	2	2	2.6	2.6	2.6	121.65	0.0090978	1.4855	22.7017844718051	0	0	0	1	1	2	0	16.8191562255295	NaN	NaN	13.6353778839111	13.905481338501	16.4179840087891	NaN	0	NaN	0	P15938	P15938	Pre-mRNA-splicing factor ATP-dependent RNA helicase PRP16	PRP16	sp|P15938|PRP16_YEAST Pre-mRNA-splicing factor ATP-dependent RNA helicase PRP16 OS=Saccharomyces cerevisiae (strain ATCC 204508 / S288c) OX=559292 GN=PRP16 PE=1 SV=2
NaN	NaN	20.7542572021484	NaN	20.0562934875488	NaN	#VALUE!	#VALUE!	#VALUE!	#VALUE!	#VALUE!	#VALUE!			1	1	1	2.2	2.2	2.2	73.113	0	3.1441	21.8863976651926	3	0	0	1	1	1	0	16.9794698545907	NaN	NaN	16.3783798217773	NaN	15.4263305664063	NaN	0	NaN	0	P16522	P16522	Anaphase-promoting complex subunit CDC23	CDC23	sp|P16522|CDC23_YEAST Anaphase-promoting complex subunit CDC23 OS=Saccharomyces cerevisiae (strain ATCC 204508 / S288c) OX=559292 GN=CDC23 PE=1 SV=1
NaN	NaN	20.5724678039551	19.0070610046387	21.3001136779785	NaN	#VALUE!	#VALUE!	1.56541	2.95961	#VALUE!	#VALUE!			1	1	1	4.2	4.2	4.2	30.116	0.0048631	1.8233	22.4416190249253	2	0	0	1	1	1	0	19.119690930038	NaN	NaN	17.781551361084	14.9419641494751	18.2551116943359	NaN	0	1.92922973632813	0	P17261	P17261	Cystine transporter	ERS1	sp|P17261|ERS1_YEAST Cystine transporter OS=Saccharomyces cerevisiae (strain ATCC 204508 / S288c) OX=559292 GN=ERS1 PE=3 SV=1
NaN	NaN	23.1833934783936	NaN	23.1347694396973	NaN	#VALUE!	#VALUE!	#VALUE!	#VALUE!	#VALUE!	#VALUE!			4	4	4	21.6	21.6	21.6	30.113	0	11.492	25.0675137969232	10	0	2	3	0	3	0	21.3670904906681	19.5681304931641	NaN	20.0982837677002	NaN	19.6186466217041	NaN	0	NaN	0	P18410	P18410	Sporulation-specific protein SPO7	SPO7	sp|P18410|SPO7_YEAST Sporulation-specific protein SPO7 OS=Saccharomyces cerevisiae (strain ATCC 204508 / S288c) OX=559292 GN=SPO7 PE=1 SV=1
NaN	NaN	20.4970684051514	20.9614810943604	20.5904884338379	NaN	#VALUE!	#VALUE!	-0.464413	0.724766	#VALUE!	#VALUE!			3	3	3	4.9	4.9	4.9	102.54	0	7.0114	23.3858760892644	9	1	1	1	2	2	1	18.6854811214843	17.1662406921387	16.1308517456055	16.3276748657227	15.5178842544556	16.1669864654541	NaN	0	-0.417702674865723	0	P18480	P18480	SWI/SNF chromatin-remodeling complex subunit SNF5	SNF5	sp|P18480|SNF5_YEAST SWI/SNF chromatin-remodeling complex subunit SNF5 OS=Saccharomyces cerevisiae (strain ATCC 204508 / S288c) OX=559292 GN=SNF5 PE=1 SV=3
27.9359016418457	20.1551151275635	NaN	NaN	NaN	NaN	7.78079	219.913	#VALUE!	#VALUE!	#VALUE!	#VALUE!			6	6	6	16.8	16.8	16.8	65.655	0	68.33	29.5598865123434	7	1	6	0	0	0	0	25.0363245562864	25.0341854095459	15.6316032409668	NaN	NaN	NaN	NaN	0	7.78078651428223	0	P19145	P19145	General amino-acid permease GAP1	GAP1	sp|P19145|GAP1_YEAST General amino-acid permease GAP1 OS=Saccharomyces cerevisiae (strain ATCC 204508 / S288c) OX=559292 GN=GAP1 PE=1 SV=2
25.650806427002	23.1439819335938	23.3746452331543	NaN	23.658182144165	NaN	2.50682	5.68368	#VALUE!	#VALUE!	#VALUE!	#VALUE!			6	6	6	14.6	14.6	14.6	62.055	0	71.534	27.6401696791343	11	3	6	2	0	1	0	23.9397506515663	23.6600341796875	19.7046031951904	20.3314514160156	NaN	19.3353385925293	NaN	0	1.08389600118001	0	P19807	P19807	Choline transport protein	HNM1	sp|P19807|HNM1_YEAST Choline transport protein OS=Saccharomyces cerevisiae (strain ATCC 204508 / S288c) OX=559292 GN=HNM1 PE=1 SV=1
21.9096546173096	NaN	NaN	NaN	NaN	NaN	#VALUE!	#VALUE!	#VALUE!	#VALUE!	#VALUE!	#VALUE!			2	2	2	36.7	36.7	36.7	11.476	0	13.313	23.5314814115113	4	0	1	2	0	1	0	21.9465308092569	21.9465312957764	NaN	NaN	NaN	NaN	NaN	0	NaN	0	P19956	P19956	54S ribosomal protein L44, mitochondrial	MRPL44	sp|P19956|RM44_YEAST 54S ribosomal protein L44, mitochondrial OS=Saccharomyces cerevisiae (strain ATCC 204508 / S288c) OX=559292 GN=MRPL44 PE=1 SV=1
NaN	NaN	NaN	21.1775512695313	NaN	21.862268447876	#VALUE!	#VALUE!	#VALUE!	#VALUE!	#VALUE!	#VALUE!			1	1	1	4	4	4	36.666	0	3.4793	21.904481745843	3	0	0	0	1	1	1	17.9975543988228	NaN	NaN	NaN	16.5274925231934	NaN	17.3515605926514	0	NaN	0	P20133	P20133	Geranylgeranyl transferase type-2 subunit beta	BET2	sp|P20133|PGTB2_YEAST Geranylgeranyl transferase type-2 subunit beta OS=Saccharomyces cerevisiae (strain ATCC 204508 / S288c) OX=559292 GN=BET2 PE=1 SV=3
25.4502296447754	NaN	NaN	NaN	NaN	NaN	#VALUE!	#VALUE!	#VALUE!	#VALUE!	#VALUE!	#VALUE!			4	4	4	10.3	10.3	10.3	70.339	0	41.333	27.0931539794562	4	0	4	1	0	0	0	23.3927041844828	23.3715896606445	NaN	17.2848243713379	NaN	NaN	NaN	0	NaN	0	P20840	P20840	Alpha-agglutinin	SAG1	sp|P20840|SAG1_YEAST Alpha-agglutinin OS=Saccharomyces cerevisiae (strain ATCC 204508 / S288c) OX=559292 GN=SAG1 PE=1 SV=2
NaN	NaN	21.4714965820313	NaN	NaN	NaN	#VALUE!	#VALUE!	#VALUE!	#VALUE!	#VALUE!	#VALUE!			1	1	1	2.4	2.4	2.4	94.571	0	3.4117	22.0025760626357	1	0	0	1	0	0	0	16.4790065528222	NaN	NaN	16.4790058135986	NaN	NaN	NaN	0	NaN	0	P21268	P21268	Cyclin-dependent kinase inhibitor FAR1	FAR1	sp|P21268|FAR1_YEAST Cyclin-dependent kinase inhibitor FAR1 OS=Saccharomyces cerevisiae (strain ATCC 204508 / S288c) OX=559292 GN=FAR1 PE=1 SV=2
NaN	21.1316337585449	NaN	21.7050590515137	NaN	22.1664371490479	#VALUE!	#VALUE!	#VALUE!	#VALUE!	#VALUE!	#VALUE!			2	2	2	6.3	6.3	6.3	48.189	0.0058763	1.7543	23.5901228299751	3	2	1	0	1	0	1	19.5026142897101	17.8615112304688	18.2781677246094	NaN	16.1794624328613	NaN	16.7800788879395	0	NaN	0	P22007	P22007	Protein farnesyltransferase subunit beta	RAM1	sp|P22007|FNTB_YEAST Protein farnesyltransferase subunit beta OS=Saccharomyces cerevisiae (strain ATCC 204508 / S288c) OX=559292 GN=RAM1 PE=1 SV=2
23.4925289154053	NaN	25.2121906280518	NaN	25.1195735931396	NaN	#VALUE!	#VALUE!	#VALUE!	#VALUE!	#VALUE!	#VALUE!			2	2	2	8.2	8.2	8.2	44.559	0	15.921	26.8388197936162	8	0	1	2	0	2	0	23.8388438323236	19.6717967987061	NaN	22.94313621521	NaN	22.5414886474609	NaN	0	NaN	0	P22140	P22140	Choline/ethanolaminephosphotransferase 1	EPT1	sp|P22140|EPT1_YEAST Choline/ethanolaminephosphotransferase 1 OS=Saccharomyces cerevisiae (strain ATCC 204508 / S288c) OX=559292 GN=EPT1 PE=1 SV=2
NaN	NaN	24.0495128631592	24.5332641601563	NaN	24.3135433197021	#VALUE!	#VALUE!	-0.483751	0.715116	#VALUE!	#VALUE!			10	6	6	18.1	13.3	13.3	80.509	0	28.686	27.8594057784463	7	1	3	1	3	0	2	22.9052349435384	22.4675712585449	18.3565559387207	19.7000541687012	19.4082298278809	NaN	17.3946475982666	0	-0.37389087677002	0	P23337	P23337	Glycogen [starch] synthase isoform 1	GSY1	sp|P23337|GYS1_YEAST Glycogen [starch] synthase isoform 1 OS=Saccharomyces cerevisiae (strain ATCC 204508 / S288c) OX=559292 GN=GSY1 PE=1 SV=3
NaN	25.1348094940186	NaN	NaN	NaN	23.6683902740479	#VALUE!	#VALUE!	#VALUE!	#VALUE!	#VALUE!	#VALUE!			4	4	4	7.8	7.8	7.8	58.881	0.0068878	1.703	25.8624951003882	4	2	2	0	0	0	1	21.3389213204642	19.3310565948486	20.6368827819824	NaN	NaN	NaN	18.4677810668945	0	NaN	0	P23796	P23796	tRNA A64-2-O-ribosylphosphate transferase	RIT1	sp|P23796|RIT1_YEAST tRNA A64-2-O-ribosylphosphate transferase OS=Saccharomyces cerevisiae (strain ATCC 204508 / S288c) OX=559292 GN=RIT1 PE=1 SV=3
24.5901222229004	23.951358795166	25.7741203308105	NaN	25.1107616424561	NaN	0.638763	1.55699	#VALUE!	#VALUE!	#VALUE!	#VALUE!			3	3	3	18.3	18.3	18.3	22.595	0	12.337	27.5559619515439	11	1	2	3	0	3	0	24.9710140736459	22.3731307983398	17.7204723358154	23.8001556396484	NaN	23.5905799865723	NaN	0	1.20697593688965	0	P23968	P23968	V-type proton ATPase subunit c	VMA16	sp|P23968|VATO_YEAST V-type proton ATPase subunit c OS=Saccharomyces cerevisiae (strain ATCC 204508 / S288c) OX=559292 GN=VMA16 PE=1 SV=1
22.4747924804688	NaN	23.3176898956299	NaN	22.4916973114014	NaN	#VALUE!	#VALUE!	#VALUE!	#VALUE!	#VALUE!	#VALUE!			6	6	6	8.1	8.1	8.1	117.27	0	11.39	25.4211436158771	8	0	4	4	0	3	0	19.7206884845882	18.9664878845215	NaN	17.7892780303955	NaN	16.9344501495361	NaN	0	NaN	0	P24004	P24004	Peroxisomal ATPase PEX1	PEX1	sp|P24004|PEX1_YEAST Peroxisomal ATPase PEX1 OS=Saccharomyces cerevisiae (strain ATCC 204508 / S288c) OX=559292 GN=PEX1 PE=1 SV=2
26.2816410064697	NaN	26.2753143310547	NaN	26.4367446899414	NaN	#VALUE!	#VALUE!	#VALUE!	#VALUE!	#VALUE!	#VALUE!			12	12	12	36.4	36.4	36.4	52.089	0	60.51	29.0407201484947	30	0	10	6	0	6	0	24.4557576477735	23.9155197143555	NaN	21.8536529541016	NaN	21.6960849761963	NaN	0	NaN	0	P25036	P25036	Subtilisin-like protease 3	YSP3	sp|P25036|YSP3_YEAST Subtilisin-like protease 3 OS=Saccharomyces cerevisiae (strain ATCC 204508 / S288c) OX=559292 GN=YSP3 PE=2 SV=2
NaN	NaN	19.8452453613281	23.7017631530762	NaN	NaN	#VALUE!	#VALUE!	-3.85652	0.0690355	#VALUE!	#VALUE!			3	3	3	13.3	13.3	13.3	41.838	0.0076453	1.6434	24.7989214499146	4	0	2	1	1	0	0	20.991546757328	20.4226512908936	NaN	16.5689353942871	19.1512546539307	NaN	NaN	0	-3.85651779174805	0	P25042	P25042	Repressor ROX1	ROX1	sp|P25042|ROX1_YEAST Repressor ROX1 OS=Saccharomyces cerevisiae (strain ATCC 204508 / S288c) OX=559292 GN=ROX1 PE=1 SV=1
NaN	NaN	24.0960330963135	NaN	23.038402557373	22.9017772674561	#VALUE!	#VALUE!	#VALUE!	#VALUE!	0.136625	1.09933			2	2	2	8	8	8	46.387	0	3.781	25.329337311259	2	0	0	2	1	2	1	21.0073749956322	NaN	NaN	20.2874870300293	14.8044843673706	19.0678119659424	17.9316844940186	0	0.665440559387207	0	P25270	P25270	rRNA methyltransferase 1, mitochondrial	MRM1	sp|P25270|MRM1_YEAST rRNA methyltransferase 1, mitochondrial OS=Saccharomyces cerevisiae (strain ATCC 204508 / S288c) OX=559292 GN=MRM1 PE=1 SV=2
20.5103626251221	NaN	NaN	NaN	NaN	NaN	#VALUE!	#VALUE!	#VALUE!	#VALUE!	#VALUE!	#VALUE!			3	3	3	7.8	7.8	7.8	75.045	0	2.9368	23.2202519597463	3	0	2	1	0	0	0	18.1758711272584	17.0878353118896	NaN	17.2588424682617	NaN	NaN	NaN	0	NaN	0	P25300;P25593	P25300	Bud site selection protein 5	BUD5	sp|P25300|BUD5_YEAST Bud site selection protein 5 OS=Saccharomyces cerevisiae (strain ATCC 204508 / S288c) OX=559292 GN=BUD5 PE=1 SV=2
21.7828884124756	24.3253288269043	20.5686683654785	NaN	NaN	NaN	-2.54244	0.171652	#VALUE!	#VALUE!	#VALUE!	#VALUE!			8	8	8	16.2	16.2	16.2	65.205	0	8.0922	25.1364135551156	13	7	3	1	0	0	2	20.0919724951842	18.6033153533936	19.2554111480713	15.7543916702271	NaN	NaN	15.2244920730591	0	-3.14955043792725	0	P25355	P25355	Copper transport protein 86	CTR86	sp|P25355|CTR86_YEAST Copper transport protein 86 OS=Saccharomyces cerevisiae (strain ATCC 204508 / S288c) OX=559292 GN=CTR86 PE=1 SV=1
20.5763473510742	NaN	20.9802932739258	NaN	20.6496562957764	20.8281898498535	#VALUE!	#VALUE!	#VALUE!	#VALUE!	-0.178534	0.883601			1	1	1	6.7	6.7	6.7	23.338	0	2.7691	23.3936208881206	5	0	1	1	0	1	1	19.9341630860326	18.7388248443604	NaN	18.0519199371338	NaN	17.4672241210938	16.7650012969971	0	-0.0927575429280587	0	P25378	P25378	Rheb-like protein RHB1	RHB1	sp|P25378|RHEB_YEAST Rheb-like protein RHB1 OS=Saccharomyces cerevisiae (strain ATCC 204508 / S288c) OX=559292 GN=RHB1 PE=1 SV=2
NaN	NaN	20.3421268463135	NaN	NaN	NaN	#VALUE!	#VALUE!	#VALUE!	#VALUE!	#VALUE!	#VALUE!			4	4	4	4.2	4.2	4.2	116.47	0	3.1928	22.0516550399967	5	0	1	1	0	2	1	16.270295326472	15.4291124343872	NaN	15.0918073654175	NaN	NaN	NaN	0	NaN	0	P25389	P25389	Probable serine/threonine-protein kinase KCC4	KCC4	sp|P25389|KCC4_YEAST Probable serine/threonine-protein kinase KCC4 OS=Saccharomyces cerevisiae (strain ATCC 204508 / S288c) OX=559292 GN=KCC4 PE=1 SV=3
NaN	NaN	NaN	23.4253444671631	NaN	22.7744464874268	#VALUE!	#VALUE!	#VALUE!	#VALUE!	#VALUE!	#VALUE!			7	7	7	23	23	23	42.963	0	10.516	24.5014241776551	9	4	2	0	1	0	2	20.5014484754723	18.2481307983398	18.8028450012207	NaN	18.6822605133057	NaN	18.1705989837646	0	NaN	0	P25454	P25454	DNA repair protein RAD51	RAD51	sp|P25454|RAD51_YEAST DNA repair protein RAD51 OS=Saccharomyces cerevisiae (strain ATCC 204508 / S288c) OX=559292 GN=RAD51 PE=1 SV=1
22.3879280090332	NaN	23.8977222442627	22.918306350708	22.1276092529297	NaN	#VALUE!	#VALUE!	0.979416	1.97167	#VALUE!	#VALUE!			2	2	2	33.8	33.8	33.8	16.35	0	3.7474	25.7778612880914	3	0	1	2	1	2	0	23.4558830395463	21.8999538421631	NaN	22.5874919891357	14.9470891952515	20.2639617919922	NaN	0	-0.11388651529948	0	P25515	P25515	V-type proton ATPase subunit c	VMA3	sp|P25515|VATL1_YEAST V-type proton ATPase subunit c OS=Saccharomyces cerevisiae (strain ATCC 204508 / S288c) OX=559292 GN=VMA3 PE=1 SV=1
NaN	NaN	19.4355068206787	19.8137187957764	NaN	NaN	#VALUE!	#VALUE!	-0.378212	0.769391	#VALUE!	#VALUE!			3	3	3	11.8	11.8	11.8	44.073	0.0010414	2.303	25.3436726140017	2	0	0	1	2	1	1	20.8842748769544	NaN	NaN	15.5071134567261	14.6111402511597	20.4725875854492	18.6413173675537	0	-0.378211975097656	0	P25559	P25559	Sister chromatid cohesion protein DCC1	DCC1	sp|P25559|DCC1_YEAST Sister chromatid cohesion protein DCC1 OS=Saccharomyces cerevisiae (strain ATCC 204508 / S288c) OX=559292 GN=DCC1 PE=1 SV=2
26.0982837677002	21.7060718536377	26.797981262207	NaN	26.6920547485352	NaN	4.39221	20.9985	#VALUE!	#VALUE!	#VALUE!	#VALUE!			8	8	8	22.7	22.7	22.7	58.843	0	97.429	29.021654517277	24	2	6	7	0	6	0	24.934181087206	23.8490962982178	17.5080413818359	23.1743240356445	NaN	22.7984962463379	NaN	0	4.82336807250977	0	P25568	P25568	Autophagy-related protein 22	ATG22	sp|P25568|ATG22_YEAST Autophagy-related protein 22 OS=Saccharomyces cerevisiae (strain ATCC 204508 / S288c) OX=559292 GN=ATG22 PE=1 SV=1
21.0371799468994	21.9713039398193	NaN	NaN	21.4277744293213	NaN	-0.934124	0.52336	#VALUE!	#VALUE!	#VALUE!	#VALUE!			1	1	1	1.6	1.6	1.6	84.516	0.0010403	2.2726	23.7462215261033	1	1	1	0	0	1	0	18.5367784134053	17.4648323059082	16.9542427062988	NaN	NaN	16.1441402435303	NaN	0	-0.738826751708984	0	P25569	P25569	Glucose-induced degradation protein 7	GID7	sp|P25569|GID7_YEAST Glucose-induced degradation protein 7 OS=Saccharomyces cerevisiae (strain ATCC 204508 / S288c) OX=559292 GN=GID7 PE=1 SV=2
NaN	29.5368251800537	27.2017230987549	30.3770999908447	NaN	NaN	#VALUE!	#VALUE!	-3.17538	0.110692	#VALUE!	#VALUE!			1	1	1	7.6	7.6	7.6	13.36	0.00026144	2.39	30.7731329170547	4	1	0	1	1	0	0	29.1882018643841	NaN	27.9518814086914	26.1478290557861	28.0489521026611	NaN	NaN	0	-2.75523948669434	0	P25572	P25572	Putative uncharacterized protein YCL042W		sp|P25572|YCE2_YEAST Putative uncharacterized protein YCL042W OS=Saccharomyces cerevisiae (strain ATCC 204508 / S288c) OX=559292 GN=YCL042W PE=4 SV=2
29.705020904541	23.4816074371338	21.7789649963379	NaN	21.5280742645264	NaN	6.22341	74.7195	#VALUE!	#VALUE!	#VALUE!	#VALUE!			11	11	11	41.3	41.3	41.3	35.651	0	127.85	31.3378798858621	22	3	11	2	0	1	0	27.3379011471459	27.3273162841797	19.6330547332764	17.9218406677246	NaN	17.4168300628662	NaN	0	0.855745951334637	0	P25577	P25577	Uncharacterized protein YCL049C		sp|P25577|YCE9_YEAST Uncharacterized protein YCL049C OS=Saccharomyces cerevisiae (strain ATCC 204508 / S288c) OX=559292 GN=YCL049C PE=1 SV=2
22.4025993347168	NaN	22.6557388305664	NaN	22.8350887298584	NaN	#VALUE!	#VALUE!	#VALUE!	#VALUE!	#VALUE!	#VALUE!			1	1	1	9.4	9.4	9.4	29.023	0	11.436	25.0885314086471	4	0	1	1	0	1	0	21.7666033137597	20.7025241851807	NaN	19.8648700714111	NaN	19.7901229858398	NaN	0	NaN	0	P25587	P25587	Protein LDB16	LDB16	sp|P25587|LDB16_YEAST Protein LDB16 OS=Saccharomyces cerevisiae (strain ATCC 204508 / S288c) OX=559292 GN=LDB16 PE=1 SV=2
22.0032291412354	NaN	22.2792053222656	NaN	21.7887134552002	NaN	#VALUE!	#VALUE!	#VALUE!	#VALUE!	#VALUE!	#VALUE!			3	3	3	8.3	8.3	8.3	47.843	0	10.225	24.5514510543945	4	0	2	2	0	1	0	19.9664885536733	18.9587230682373	NaN	18.5846099853516	NaN	16.894983291626	NaN	0	NaN	0	P25591	P25591	vacuole-related protein 17	VAC17	sp|P25591|VAC17_YEAST vacuole-related protein 17 OS=Saccharomyces cerevisiae (strain ATCC 204508 / S288c) OX=559292 GN=VAC17 PE=1 SV=2
24.9733810424805	NaN	22.4270839691162	NaN	22.9200706481934	NaN	#VALUE!	#VALUE!	#VALUE!	#VALUE!	#VALUE!	#VALUE!			3	3	3	19.3	19.3	19.3	37.044	0	23.779	26.8868116172609	5	0	3	1	0	1	0	23.7169098680294	23.5428581237793	NaN	19.4554119110107	NaN	19.694299697876	NaN	0	NaN	0	P25619	P25619	30 kDa heat shock protein	HSP30	sp|P25619|HSP30_YEAST 30 kDa heat shock protein OS=Saccharomyces cerevisiae (strain ATCC 204508 / S288c) OX=559292 GN=HSP30 PE=1 SV=1
25.4604835510254	22.0247230529785	20.8935623168945	NaN	21.0410633087158	NaN	3.43576	10.821	#VALUE!	#VALUE!	#VALUE!	#VALUE!			2	2	2	5.5	5.5	5.5	58.256	0.0012957	2.187	27.1693999384195	3	1	2	1	0	1	0	23.2625571323679	23.1584014892578	17.9989318847656	17.7584438323975	NaN	17.7256050109863	NaN	0	0.440313339233398	0	P25621	P25621	Pantothenate transporter FEN2	FEN2	sp|P25621|FEN2_YEAST Pantothenate transporter FEN2 OS=Saccharomyces cerevisiae (strain ATCC 204508 / S288c) OX=559292 GN=FEN2 PE=1 SV=1
NaN	NaN	23.3067474365234	NaN	23.967191696167	NaN	#VALUE!	#VALUE!	#VALUE!	#VALUE!	#VALUE!	#VALUE!			3	3	3	21.2	21.2	21.2	16.38	0.00026151	2.4127	25.3161019571944	2	0	0	3	2	3	1	21.994173862307	NaN	NaN	20.6435928344727	18.7542095184326	20.8352241516113	17.7882595062256	0	NaN	0	P25642	P25642	54S ribosomal protein IMG2, mitochondrial	IMG2	sp|P25642|IMG2_YEAST 54S ribosomal protein IMG2, mitochondrial OS=Saccharomyces cerevisiae (strain ATCC 204508 / S288c) OX=559292 GN=IMG2 PE=1 SV=2
20.886360168457	21.6834182739258	21.0184211730957	NaN	21.4165840148926	NaN	-0.797058	0.575522	#VALUE!	#VALUE!	#VALUE!	#VALUE!			1	1	1	1.4	1.4	1.4	166.86	0.0030856	1.9501	23.8841817006673	2	1	1	1	0	1	0	17.6554328929509	16.1480007171631	15.4272804260254	15.2933282852173	NaN	15.5984010696411	NaN	0	-0.576296488444012	0	P25648	P25648	Mediator of RNA polymerase II transcription subunit 12	SRB8	sp|P25648|SRB8_YEAST Mediator of RNA polymerase II transcription subunit 12 OS=Saccharomyces cerevisiae (strain ATCC 204508 / S288c) OX=559292 GN=SRB8 PE=1 SV=2
22.9188175201416	23.7848663330078	NaN	20.067497253418	NaN	21.0917148590088	-0.866049	0.548647	#VALUE!	#VALUE!	#VALUE!	#VALUE!			7	7	7	8.9	8.9	8.9	109.41	0	6.88	25.3906394691095	9	5	4	0	1	0	2	19.5832884826533	18.9809761047363	17.7901706695557	NaN	13.1969404220581	NaN	14.9681720733643	0	1.27079137166341	0	P25846	P25846	DNA mismatch repair protein MSH1, mitochondrial	MSH1	sp|P25846|MSH1_YEAST DNA mismatch repair protein MSH1, mitochondrial OS=Saccharomyces cerevisiae (strain ATCC 204508 / S288c) OX=559292 GN=MSH1 PE=1 SV=2
NaN	NaN	NaN	NaN	NaN	22.1817417144775	#VALUE!	#VALUE!	#VALUE!	#VALUE!	#VALUE!	#VALUE!			2	2	2	8.3	8.3	8.3	61.223	0.0025733	1.9584	21.5779155846755	3	0	0	0	1	0	2	16.7705606626179	NaN	NaN	NaN	NaN	NaN	16.7705612182617	0	NaN	0	P26370	P26370	Transcriptional activator protein UGA3	UGA3	sp|P26370|UGA3_YEAST Transcriptional activator protein UGA3 OS=Saccharomyces cerevisiae (strain ATCC 204508 / S288c) OX=559292 GN=UGA3 PE=1 SV=1
NaN	NaN	21.3561687469482	NaN	21.9045181274414	21.365062713623	#VALUE!	#VALUE!	#VALUE!	#VALUE!	0.539455	1.45342			1	1	1	4.8	4.8	4.8	36.33	0	3.9604	23.3118824352119	2	0	0	1	0	1	1	19.2243738725645	NaN	NaN	17.7997493743896	NaN	18.0939846038818	16.6738338470459	0	0.265280723571777	0	P27680	P27680	Ubiquinone biosynthesis O-methyltransferase, mitochondrial	COQ3	sp|P27680|COQ3_YEAST Ubiquinone biosynthesis O-methyltransferase, mitochondrial OS=Saccharomyces cerevisiae (strain ATCC 204508 / S288c) OX=559292 GN=COQ3 PE=1 SV=2
21.3257541656494	21.9002132415771	21.1630630493164	NaN	NaN	NaN	-0.574459	0.671538	#VALUE!	#VALUE!	#VALUE!	#VALUE!			2	2	2	6.3	6.3	6.3	55.531	0	4.0693	23.8761459432652	3	1	1	1	0	0	1	19.7886418735361	18.8601474761963	17.8127784729004	17.6066799163818	NaN	NaN	NaN	0	-0.655804634094238	0	P27705	P27705	Regulatory protein MIG1	MIG1	sp|P27705|MIG1_YEAST Regulatory protein MIG1 OS=Saccharomyces cerevisiae (strain ATCC 204508 / S288c) OX=559292 GN=MIG1 PE=1 SV=1
NaN	NaN	15.9633932113647	NaN	16.6126670837402	NaN	#VALUE!	#VALUE!	#VALUE!	#VALUE!	#VALUE!	#VALUE!			2	2	2	3.4	3.4	3.4	113.31	0.0048643	1.825	17.7055648944353	3	0	0	1	1	1	0	11.7747870596012	NaN	NaN	10.5636730194092	NaN	10.9589147567749	NaN	0	NaN	0	P27895	P27895	Kinesin-like protein CIN8	CIN8	sp|P27895|CIN8_YEAST Kinesin-like protein CIN8 OS=Saccharomyces cerevisiae (strain ATCC 204508 / S288c) OX=559292 GN=CIN8 PE=1 SV=3
22.6844234466553	22.9466915130615	NaN	NaN	NaN	NaN	-0.262268	0.833776	#VALUE!	#VALUE!	#VALUE!	#VALUE!			6	6	6	10.9	10.9	10.9	78.377	0	2.8143	24.8295833883909	6	3	4	0	1	1	0	19.6201338936853	19.1950588226318	17.64990234375	NaN	NaN	NaN	NaN	0	-0.26226806640625	0	P28743	P28743	Kinesin-like protein KIP2	KIP2	sp|P28743|KIP2_YEAST Kinesin-like protein KIP2 OS=Saccharomyces cerevisiae (strain ATCC 204508 / S288c) OX=559292 GN=KIP2 PE=1 SV=1
NaN	NaN	20.1798610687256	NaN	NaN	NaN	#VALUE!	#VALUE!	#VALUE!	#VALUE!	#VALUE!	#VALUE!			1	1	1	2.9	2.9	2.9	46.77	0	2.8155	20.7108703195298	1	0	0	1	0	0	0	16.3185957659196	NaN	NaN	16.3185958862305	NaN	NaN	NaN	0	NaN	0	P30775	P30775	Peptide chain release factor 1, mitochondrial	MRF1	sp|P30775|RF1M_YEAST Peptide chain release factor 1, mitochondrial OS=Saccharomyces cerevisiae (strain ATCC 204508 / S288c) OX=559292 GN=MRF1 PE=1 SV=1
22.576623916626	21.991304397583	22.6672859191895	NaN	23.1526718139648	NaN	0.58532	1.50037	#VALUE!	#VALUE!	#VALUE!	#VALUE!			5	5	5	9.3	9.3	9.3	72.565	0	6.376	25.2632379616039	8	1	1	4	0	5	0	20.1757249649523	18.3527679443359	16.1455936431885	18.3946895599365	NaN	18.7225399017334	NaN	0	0.80755615234375	0	P30777	P30777	GPI mannosyltransferase 3	GPI10	sp|P30777|GPI10_YEAST GPI mannosyltransferase 3 OS=Saccharomyces cerevisiae (strain ATCC 204508 / S288c) OX=559292 GN=GPI10 PE=1 SV=2
NaN	NaN	26.0231628417969	NaN	25.8464202880859	NaN	#VALUE!	#VALUE!	#VALUE!	#VALUE!	#VALUE!	#VALUE!			1	1	1	2	2	2	45.576	0.0091232	1.5254	27.3548105652978	2	0	0	1	0	1	0	22.7698547888446	NaN	NaN	21.9692325592041	NaN	21.5384368896484	NaN	0	NaN	0	P31378	P31378	Endonuclease III homolog 1	NTG1	sp|P31378|NTH1_YEAST Endonuclease III homolog 1 OS=Saccharomyces cerevisiae (strain ATCC 204508 / S288c) OX=559292 GN=NTG1 PE=1 SV=1
21.5273113250732	NaN	NaN	22.2762832641602	NaN	NaN	#VALUE!	#VALUE!	#VALUE!	#VALUE!	#VALUE!	#VALUE!			2	2	2	7.3	7.3	7.3	49.21	0	3.8302	23.9331006190478	2	0	2	0	2	0	1	19.5407561741946	19.0258865356445	NaN	NaN	16.9531059265137	NaN	16.6387748718262	0	-0.748971939086914	0	P32047	P32047	Protein MLF3	MLF3	sp|P32047|MLF3_YEAST Protein MLF3 OS=Saccharomyces cerevisiae (strain ATCC 204508 / S288c) OX=559292 GN=MLF3 PE=1 SV=2
27.7087249755859	22.314208984375	22.3131008148193	NaN	23.0840759277344	NaN	5.39452	42.0641	#VALUE!	#VALUE!	#VALUE!	#VALUE!			6	6	6	6.7	6.7	6.7	133.11	0	80.99	29.3863613591574	13	1	6	2	0	2	0	25.6859216410163	25.6397838592529	17.9509429931641	19.0773105621338	NaN	19.7669582366943	NaN	0	2.05442492167155	0	P32334	P32334	Signaling mucin MSB2	MSB2	sp|P32334|MSB2_YEAST Signaling mucin MSB2 OS=Saccharomyces cerevisiae (strain ATCC 204508 / S288c) OX=559292 GN=MSB2 PE=1 SV=1
28.9006099700928	25.5488376617432	NaN	NaN	NaN	NaN	3.35177	10.209	#VALUE!	#VALUE!	#VALUE!	#VALUE!			11	11	11	30.6	30.6	30.6	37.179	0	195.74	30.6090239569044	24	7	11	0	0	0	0	26.6090768115889	26.5852012634277	20.6765899658203	NaN	NaN	NaN	NaN	0	3.35177230834961	0	P32339	P32339	Heme-binding protein HMX1	HMX1	sp|P32339|HMX1_YEAST Heme-binding protein HMX1 OS=Saccharomyces cerevisiae (strain ATCC 204508 / S288c) OX=559292 GN=HMX1 PE=2 SV=3
NaN	NaN	NaN	20.7672500610352	20.4402008056641	20.3623886108398	#VALUE!	#VALUE!	#VALUE!	#VALUE!	0.0778122	1.05542			4	4	4	8.2	8.2	8.2	74.372	0	2.7074	23.7186875521375	6	2	2	0	1	1	1	19.3263899852205	17.7368106842041	18.0093593597412	NaN	15.6318025588989	16.3248844146729	15.3662538528442	0	-0.124618530273438	0	P32389	P32389	Transcriptional activator of sulfur metabolism MET4	MET4	sp|P32389|MET4_YEAST Transcriptional activator of sulfur metabolism MET4 OS=Saccharomyces cerevisiae (strain ATCC 204508 / S288c) OX=559292 GN=MET4 PE=1 SV=2
NaN	NaN	22.2214622497559	22.6997947692871	23.0458030700684	NaN	#VALUE!	#VALUE!	-0.478333	0.717807	#VALUE!	#VALUE!			1	1	1	4.1	4.1	4.1	74.784	0	6.8043	24.2604768219269	7	0	0	1	1	1	0	20.1730426950256	NaN	NaN	17.7695274353027	18.1792774200439	19.3362979888916	NaN	0	-0.066162109375	0	P32432	P32432	Transcription factor SFP1	SFP1	sp|P32432|SFP1_YEAST Transcription factor SFP1 OS=Saccharomyces cerevisiae (strain ATCC 204508 / S288c) OX=559292 GN=SFP1 PE=1 SV=1
20.9134216308594	22.5103149414063	NaN	22.6930027008057	NaN	21.7518081665039	-1.59689	0.330588	#VALUE!	#VALUE!	#VALUE!	#VALUE!			3	3	3	7.8	7.8	7.8	38.225	0	4.4316	24.3598449837167	10	2	2	0	2	0	2	20.5525302662556	19.3991184234619	18.7855167388916	NaN	17.4781684875488	NaN	17.69411277771	0	-1.40495363871257	0	P32452	P32452	Putative prephenate dehydratase	PHA2	sp|P32452|PHA2_YEAST Putative prephenate dehydratase OS=Saccharomyces cerevisiae (strain ATCC 204508 / S288c) OX=559292 GN=PHA2 PE=1 SV=3
21.5709857940674	22.2935886383057	NaN	22.0755176544189	NaN	22.6788921356201	-0.722603	0.606003	#VALUE!	#VALUE!	#VALUE!	#VALUE!			6	6	6	13.8	13.8	13.8	79.281	0	4.3295	24.6741676944153	8	3	2	0	1	2	3	19.3522503775314	17.7811679840088	17.3879337310791	NaN	15.0832300186157	16.8492832183838	16.8694248199463	0	-0.778347015380859	0	P32494	P32494	Chromatin-remodeling complexes subunit NGG1	NGG1	sp|P32494|NGG1_YEAST Chromatin-remodeling complexes subunit NGG1 OS=Saccharomyces cerevisiae (strain ATCC 204508 / S288c) OX=559292 GN=NGG1 PE=1 SV=1
22.7540950775146	22.6679344177246	NaN	NaN	NaN	21.5872402191162	0.0861607	1.06154	#VALUE!	#VALUE!	#VALUE!	#VALUE!			5	5	5	8.8	8.8	8.8	58.32	0	5.5831	24.7306558753982	6	4	3	0	1	0	3	20.2712760767728	19.6069869995117	18.5639476776123	NaN	NaN	NaN	16.2770328521729	0	0.626507759094238	0	P32505	P32505	Nuclear polyadenylated RNA-binding protein NAB2	NAB2	sp|P32505|NAB2_YEAST Nuclear polyadenylated RNA-binding protein NAB2 OS=Saccharomyces cerevisiae (strain ATCC 204508 / S288c) OX=559292 GN=NAB2 PE=1 SV=1
NaN	NaN	21.32008934021	NaN	21.2161426544189	NaN	#VALUE!	#VALUE!	#VALUE!	#VALUE!	#VALUE!	#VALUE!			2	2	2	4.8	4.8	4.8	81.03	0	4.7094	22.7226532962112	3	0	0	2	0	2	0	17.5132186897688	NaN	NaN	17.0264797210693	NaN	15.7091379165649	NaN	0	NaN	0	P32562	P32562	Cell cycle serine/threonine-protein kinase CDC5/MSD2	CDC5	sp|P32562|CDC5_YEAST Cell cycle serine/threonine-protein kinase CDC5/MSD2 OS=Saccharomyces cerevisiae (strain ATCC 204508 / S288c) OX=559292 GN=CDC5 PE=1 SV=1
23.2115306854248	NaN	24.1573066711426	22.9583148956299	24.0773277282715	NaN	#VALUE!	#VALUE!	1.19899	2.29579	#VALUE!	#VALUE!			3	3	3	15.1	15.1	15.1	27.887	0	5.623	26.3044162212468	8	0	2	2	1	2	0	22.7194397938224	20.9713382720947	NaN	21.2431297302246	17.7150497436523	21.0379161834717	NaN	0	0.857073465983074	0	P32584	P32584	Protein-S-isoprenylcysteine O-methyltransferase	STE14	sp|P32584|STE14_YEAST Protein-S-isoprenylcysteine O-methyltransferase OS=Saccharomyces cerevisiae (strain ATCC 204508 / S288c) OX=559292 GN=STE14 PE=1 SV=1
NaN	NaN	NaN	20.1338291168213	NaN	NaN	#VALUE!	#VALUE!	#VALUE!	#VALUE!	#VALUE!	#VALUE!			1	1	1	5	5	5	34.378	0.0093434	1.4757	19.3907063728728	0	0	0	0	1	0	0	15.3907063728728	NaN	NaN	NaN	15.3907060623169	NaN	NaN	0	NaN	0	P32605	P32605	U1 small nuclear ribonucleoprotein A	MUD1	sp|P32605|RU1A_YEAST U1 small nuclear ribonucleoprotein A OS=Saccharomyces cerevisiae (strain ATCC 204508 / S288c) OX=559292 GN=MUD1 PE=1 SV=1
22.207498550415	NaN	22.230842590332	NaN	22.7053108215332	NaN	#VALUE!	#VALUE!	#VALUE!	#VALUE!	#VALUE!	#VALUE!			3	3	3	2.5	2.5	2.5	195.38	0	5.8102	24.7277509800442	6	0	2	3	0	3	0	18.3354688660987	16.9322605133057	NaN	16.544994354248	NaN	16.7483234405518	NaN	0	NaN	0	P32634	P32634	Negative regulator of sporulation PMD1	PMD1	sp|P32634|PMD1_YEAST Negative regulator of sporulation PMD1 OS=Saccharomyces cerevisiae (strain ATCC 204508 / S288c) OX=559292 GN=PMD1 PE=1 SV=1
23.9058227539063	24.4864025115967	NaN	24.4997825622559	NaN	24.3716564178467	-0.58058	0.668695	#VALUE!	#VALUE!	#VALUE!	#VALUE!			6	6	6	10.8	10.8	10.8	81.115	0	5.8255	25.7986495813892	9	3	1	0	4	0	4	20.6287196364085	16.9507160186768	16.5272636413574	NaN	19.5949230194092	NaN	19.2144241333008	0	-0.546791076660156	0	P32775	P32775	1,4-alpha-glucan-branching enzyme	GLC3	sp|P32775|GLGB_YEAST 1,4-alpha-glucan-branching enzyme OS=Saccharomyces cerevisiae (strain ATCC 204508 / S288c) OX=559292 GN=GLC3 PE=1 SV=2
NaN	NaN	22.8197574615479	NaN	22.8765201568604	NaN	#VALUE!	#VALUE!	#VALUE!	#VALUE!	#VALUE!	#VALUE!			3	3	3	13.3	13.3	13.3	30.751	0	3.0978	24.26026144609	5	0	0	3	0	2	0	20.1727986048396	NaN	NaN	19.3174076080322	NaN	19.0120620727539	NaN	0	NaN	0	P32800	P32800	Peroxisomal biogenesis factor 2	PEX2	sp|P32800|PEX2_YEAST Peroxisomal biogenesis factor 2 OS=Saccharomyces cerevisiae (strain ATCC 204508 / S288c) OX=559292 GN=PEX2 PE=1 SV=1
24.0573844909668	NaN	24.8263378143311	NaN	24.5065174102783	21.189001083374	#VALUE!	#VALUE!	#VALUE!	#VALUE!	3.31752	9.96947			10	10	10	23.6	23.6	23.6	72.149	0	17.013	26.9139917961001	20	0	5	7	0	7	1	21.7045521214623	20.4493980407715	NaN	19.9892616271973	NaN	19.8071765899658	14.7532691955566	0	3.27441215515137	0	P32801	P32801	Serine/threonine-protein kinase ELM1	ELM1	sp|P32801|ELM1_YEAST Serine/threonine-protein kinase ELM1 OS=Saccharomyces cerevisiae (strain ATCC 204508 / S288c) OX=559292 GN=ELM1 PE=1 SV=2
27.0558967590332	22.5967559814453	22.2543907165527	NaN	23.4066543579102	NaN	4.45914	21.9956	#VALUE!	#VALUE!	#VALUE!	#VALUE!			6	6	6	12.2	12.2	12.2	41.581	0	47.722	28.772220625266	21	2	6	1	0	3	0	25.1872581245448	25.1064949035645	19.1107482910156	18.6457920074463	NaN	20.0748310089111	NaN	0	1.64222462972005	0	P32804	P32804	Zinc-regulated transporter 1	ZRT1	sp|P32804|ZRT1_YEAST Zinc-regulated transporter 1 OS=Saccharomyces cerevisiae (strain ATCC 204508 / S288c) OX=559292 GN=ZRT1 PE=1 SV=1
22.4081573486328	22.6057357788086	NaN	22.5092506408691	NaN	22.2884159088135	-0.197578	0.872013	#VALUE!	#VALUE!	#VALUE!	#VALUE!			2	2	2	13	13	13	33.994	0	5.1624	25.4962211043465	4	2	2	0	1	0	1	21.6888905678935	21.4012470245361	18.5619373321533	NaN	16.8661689758301	NaN	16.6742477416992	0	-0.0596434275309257	0	P32805	P32805	Zinc finger protein FZF1	FZF1	sp|P32805|FZF1_YEAST Zinc finger protein FZF1 OS=Saccharomyces cerevisiae (strain ATCC 204508 / S288c) OX=559292 GN=FZF1 PE=1 SV=2
NaN	20.2831974029541	NaN	NaN	NaN	NaN	#VALUE!	#VALUE!	#VALUE!	#VALUE!	#VALUE!	#VALUE!			1	1	1	2.6	2.6	2.6	53.814	0.0073961	1.6885	20.283196898427	1	1	0	0	0	0	0	16.1957374490889	NaN	16.1957378387451	NaN	NaN	NaN	NaN	0	NaN	0	P32806	P32806	GTPase-activating protein GYP6	GYP6	sp|P32806|GYP6_YEAST GTPase-activating protein GYP6 OS=Saccharomyces cerevisiae (strain ATCC 204508 / S288c) OX=559292 GN=GYP6 PE=1 SV=2
20.0504589080811	NaN	NaN	NaN	NaN	NaN	#VALUE!	#VALUE!	#VALUE!	#VALUE!	#VALUE!	#VALUE!			1	1	1	2.3	2.3	2.3	77.65	0.0043556	1.8464	21.6722803027233	2	0	1	0	0	0	1	16.917418701495	16.9174194335938	NaN	NaN	NaN	NaN	NaN	0	NaN	0	P32829	P32829	Double-strand break repair protein MRE11	MRE11	sp|P32829|MRE11_YEAST Double-strand break repair protein MRE11 OS=Saccharomyces cerevisiae (strain ATCC 204508 / S288c) OX=559292 GN=MRE11 PE=1 SV=2
NaN	22.589916229248	NaN	NaN	NaN	NaN	#VALUE!	#VALUE!	#VALUE!	#VALUE!	#VALUE!	#VALUE!			2	2	2	4.5	4.5	4.5	71.237	0.0018107	2.103	22.5899171730089	1	2	0	0	0	0	0	17.6830494296222	NaN	17.6830501556396	NaN	NaN	NaN	NaN	0	NaN	0	P32833	P32833	Origin recognition complex subunit 2	ORC2	sp|P32833|ORC2_YEAST Origin recognition complex subunit 2 OS=Saccharomyces cerevisiae (strain ATCC 204508 / S288c) OX=559292 GN=ORC2 PE=1 SV=2
22.7024192810059	NaN	23.2286434173584	21.5158576965332	22.7146053314209	NaN	#VALUE!	#VALUE!	1.71279	3.27793	#VALUE!	#VALUE!			8	8	8	18.4	18.4	18.4	63.367	0	45.085	25.3314574133835	14	1	2	6	2	6	1	20.5241093253261	18.8070335388184	15.2705144882202	18.9451236724854	15.2301330566406	18.8317031860352	NaN	0	1.36603164672852	0	P32893	P32893	Trafficking protein particle complex II-specific subunit 65	TRS65	sp|P32893|TRS65_YEAST Trafficking protein particle complex II-specific subunit 65 OS=Saccharomyces cerevisiae (strain ATCC 204508 / S288c) OX=559292 GN=TRS65 PE=1 SV=1
28.890962600708	24.0811538696289	21.3516998291016	NaN	21.0483989715576	NaN	4.80981	28.0477	#VALUE!	#VALUE!	#VALUE!	#VALUE!			14	14	14	39.3	39.3	39.3	44.807	0	46.682	30.8043203912785	27	6	13	1	0	1	1	26.4823922963912	26.1544895172119	20.6253337860107	16.6837348937988	NaN	16.1264019012451	24.041431427002	0	-0.317466735839844	0	P33300	P33300	Mannosyl phosphorylinositol ceramide synthase SUR1	SUR1	sp|P33300|SUR1_YEAST Mannosyl phosphorylinositol ceramide synthase SUR1 OS=Saccharomyces cerevisiae (strain ATCC 204508 / S288c) OX=559292 GN=SUR1 PE=1 SV=1
NaN	22.5256156921387	22.3241329193115	22.9624881744385	NaN	22.6604042053223	#VALUE!	#VALUE!	-0.638355	0.642445	#VALUE!	#VALUE!			3	3	3	7.2	7.2	7.2	93.737	0	3.721	24.3487459812306	3	1	0	1	1	0	3	19.490737300138	NaN	17.4182319641113	17.5463066101074	17.548791885376	NaN	17.4448375701904	0	-0.392036437988281	0	P33306	P33306	Protein BCK2	BCK2	sp|P33306|BCK2_YEAST Protein BCK2 OS=Saccharomyces cerevisiae (strain ATCC 204508 / S288c) OX=559292 GN=BCK2 PE=1 SV=2
23.6535968780518	23.7535839080811	24.0420150756836	NaN	24.1308479309082	NaN	-0.099987	0.933041	#VALUE!	#VALUE!	#VALUE!	#VALUE!			10	4	4	16.6	7.9	7.9	78.491	0	13.422	26.6418239880103	7	1	3	4	0	3	0	21.3198683368471	19.9479217529297	17.5592136383057	19.6994609832764	NaN	19.0994911193848	NaN	0	0.188569386800129	0	P33329	P33329	Serine/threonine-protein phosphatase PP-Z2	PPZ2	sp|P33329|PPZ2_YEAST Serine/threonine-protein phosphatase PP-Z2 OS=Saccharomyces cerevisiae (strain ATCC 204508 / S288c) OX=559292 GN=PPZ2 PE=1 SV=4
22.3771095275879	22.1237621307373	NaN	NaN	NaN	NaN	0.253347	1.19197	#VALUE!	#VALUE!	#VALUE!	#VALUE!			3	3	3	6.9	6.9	6.9	68.232	0.0081466	1.5966	24.3600459954962	4	2	3	0	0	0	0	19.5020315003502	19.165922164917	17.2354717254639	NaN	NaN	NaN	NaN	0	0.253347396850586	0	P33400	P33400	pH-response transcription factor pacC/RIM101	RIM101	sp|P33400|PACC_YEAST pH-response transcription factor pacC/RIM101 OS=Saccharomyces cerevisiae (strain ATCC 204508 / S288c) OX=559292 GN=RIM101 PE=1 SV=2
23.8949508666992	24.9604911804199	NaN	25.0486392974854	NaN	24.5257587432861	-1.06554	0.477794	#VALUE!	#VALUE!	#VALUE!	#VALUE!			3	3	3	10.2	10.2	10.2	67.855	0	4.0786	26.2192070809965	5	2	1	0	2	0	2	22.7597736156138	18.9309921264648	20.7610931396484	NaN	21.5239181518555	NaN	20.787239074707	0	-0.95001220703125	0	P33417	P33417	Intrastrand cross-link recognition protein	IXR1	sp|P33417|IXR1_YEAST Intrastrand cross-link recognition protein OS=Saccharomyces cerevisiae (strain ATCC 204508 / S288c) OX=559292 GN=IXR1 PE=1 SV=2
22.1239528656006	NaN	20.6991386413574	NaN	20.2298755645752	NaN	#VALUE!	#VALUE!	#VALUE!	#VALUE!	#VALUE!	#VALUE!			3	2	2	6.4	4.7	4.7	50.651	0	4.362	24.2196317696495	4	0	2	1	0	1	0	19.8273520088725	19.6070232391357	NaN	16.3243217468262	NaN	15.6010160446167	NaN	0	NaN	0	P33550	P33550	Probable mannosyltransferase KTR2	KTR2	sp|P33550|KTR2_YEAST Probable mannosyltransferase KTR2 OS=Saccharomyces cerevisiae (strain ATCC 204508 / S288c) OX=559292 GN=KTR2 PE=3 SV=1
NaN	22.0454692840576	21.5239181518555	22.2522850036621	NaN	NaN	#VALUE!	#VALUE!	-0.728367	0.603587	#VALUE!	#VALUE!			2	2	2	3.3	3.3	3.3	77.86	0	4.9567	23.4611396768981	5	2	1	1	1	0	1	19.3737105664329	NaN	18.2033290863037	17.6913204193115	17.3394317626953	NaN	NaN	0	-0.624958992004395	0	P33748	P33748	Zinc finger protein MSN2	MSN2	sp|P33748|MSN2_YEAST Zinc finger protein MSN2 OS=Saccharomyces cerevisiae (strain ATCC 204508 / S288c) OX=559292 GN=MSN2 PE=1 SV=1
22.0039138793945	NaN	22.2987442016602	NaN	22.2303447723389	22.922233581543	#VALUE!	#VALUE!	#VALUE!	#VALUE!	-0.691889	0.619043			2	2	2	15.8	15.8	15.8	20.783	0	12.368	24.7318990422488	9	0	1	2	1	1	2	21.924518231805	20.1384620666504	NaN	20.3518619537354	NaN	19.0861778259277	19.82936668396	0	-0.744565963745117	0	P34232	P34232	mRNA transport regulator MTR2	MTR2	sp|P34232|MTR2_YEAST mRNA transport regulator MTR2 OS=Saccharomyces cerevisiae (strain ATCC 204508 / S288c) OX=559292 GN=MTR2 PE=1 SV=1
22.7691478729248	NaN	27.1141624450684	22.1003074645996	25.757251739502	NaN	#VALUE!	#VALUE!	5.01385	32.3088	#VALUE!	#VALUE!			21	21	21	40.8	40.8	40.8	93.358	0	93.131	28.2152588845648	49	0	4	20	1	15	0	22.6606644774613	19.8422393798828	NaN	21.5637893676758	14.624852180481	21.2906951904297	NaN	0	3.1132132212321	0	P34239	P34239	Protein LST4	LST4	sp|P34239|LST4_YEAST Protein LST4 OS=Saccharomyces cerevisiae (strain ATCC 204508 / S288c) OX=559292 GN=LST4 PE=1 SV=1
23.658073425293	23.7243194580078	NaN	20.0431346893311	NaN	20.2025165557861	-0.066246	0.95512	#VALUE!	#VALUE!	#VALUE!	#VALUE!			6	6	6	11.1	11.1	11.1	78.272	0	7.497	25.6541438847344	11	5	5	0	1	0	2	20.332215789847	19.7917766571045	18.4817199707031	NaN	14.3001384735107	NaN	14.6785449981689	0	2.33474985758464	0	P34243	P34243	DNA polymerase alpha-associated DNA helicase A	HCS1	sp|P34243|HCS1_YEAST DNA polymerase alpha-associated DNA helicase A OS=Saccharomyces cerevisiae (strain ATCC 204508 / S288c) OX=559292 GN=HCS1 PE=1 SV=1
22.6420936584473	NaN	23.4145450592041	NaN	24.1891822814941	NaN	#VALUE!	#VALUE!	#VALUE!	#VALUE!	#VALUE!	#VALUE!			3	3	3	36.3	36.3	36.3	13.521	0	16.785	25.7405713442633	8	0	2	3	0	3	0	23.1556088435421	21.165885925293	NaN	21.4884147644043	NaN	21.9492053985596	NaN	0	NaN	0	P35727	P35727	Biogenesis of lysosome-related organelles complex 1 subunit BLI1	BLI1	sp|P35727|BLI1_YEAST Biogenesis of lysosome-related organelles complex 1 subunit BLI1 OS=Saccharomyces cerevisiae (strain ATCC 204508 / S288c) OX=559292 GN=BLI1 PE=1 SV=1
22.4786720275879	NaN	NaN	23.8633460998535	NaN	23.730863571167	#VALUE!	#VALUE!	#VALUE!	#VALUE!	#VALUE!	#VALUE!			3	2	2	7.7	6	6	52.757	0	16.368	25.3032668160279	8	0	1	0	2	0	1	20.8438351973906	20.0823879241943	NaN	NaN	18.5354118347168	NaN	18.5798683166504	0	-1.31843280792236	0	P35842;P38693;P00635	P35842;P38693	Acid phosphatase PHO11;Acid phosphatase PHO12	PHO11;PHO12	sp|P35842|PPAB_YEAST Acid phosphatase PHO11 OS=Saccharomyces cerevisiae (strain ATCC 204508 / S288c) OX=559292 GN=PHO11 PE=1 SV=1;sp|P38693|PPAC_YEAST Acid phosphatase PHO12 OS=Saccharomyces cerevisiae (strain ATCC 204508 / S288c) OX=559292 GN=PHO12 PE=1 S
NaN	NaN	24.1613864898682	NaN	24.4462585449219	NaN	#VALUE!	#VALUE!	#VALUE!	#VALUE!	#VALUE!	#VALUE!			6	6	6	18.7	18.7	18.7	49.504	0	20.138	25.8523144274398	13	0	0	5	1	5	0	21.4599898601128	NaN	NaN	20.6022281646729	17.7874298095703	20.0247230529785	NaN	0	NaN	0	P35843	P35843	Protein HES1	HES1	sp|P35843|HES1_YEAST Protein HES1 OS=Saccharomyces cerevisiae (strain ATCC 204508 / S288c) OX=559292 GN=HES1 PE=1 SV=1
22.6697521209717	NaN	21.5752391815186	NaN	NaN	NaN	#VALUE!	#VALUE!	#VALUE!	#VALUE!	#VALUE!	#VALUE!			3	2	2	15.9	10.9	10.9	24.647	0	3.0589	24.6943957233237	2	0	2	1	0	0	0	20.5244919776832	20.3758106231689	NaN	17.171724319458	NaN	NaN	NaN	0	NaN	0	P36019	P36019	GTP-binding protein YPT53	YPT53	sp|P36019|YPT53_YEAST GTP-binding protein YPT53 OS=Saccharomyces cerevisiae (strain ATCC 204508 / S288c) OX=559292 GN=YPT53 PE=1 SV=1
NaN	NaN	21.5404720306396	20.7979621887207	21.2231712341309	NaN	#VALUE!	#VALUE!	0.74251	1.67308	#VALUE!	#VALUE!			6	6	6	2.2	2.2	2.2	471.34	0	7.1025	24.8707010960702	9	2	1	2	2	2	0	17.0126900033333	16.5269737243652	13.018217086792	13.4781379699707	13.3279733657837	12.9315872192383	NaN	0	0.583859443664551	0	P36022	P36022	Dynein heavy chain, cytoplasmic	DYN1	sp|P36022|DYHC_YEAST Dynein heavy chain, cytoplasmic OS=Saccharomyces cerevisiae (strain ATCC 204508 / S288c) OX=559292 GN=DYN1 PE=1 SV=1
20.828577041626	NaN	NaN	NaN	NaN	NaN	#VALUE!	#VALUE!	#VALUE!	#VALUE!	#VALUE!	#VALUE!			2	1	1	3.2	2.1	2.1	82.702	0.003341	1.9424	22.4504058117607	1	0	1	0	0	0	0	17.1284777168733	17.1284770965576	NaN	NaN	NaN	NaN	NaN	0	NaN	0	P36026	P36026	Ubiquitin carboxyl-terminal hydrolase 11	UBP11	sp|P36026|UBP11_YEAST Ubiquitin carboxyl-terminal hydrolase 11 OS=Saccharomyces cerevisiae (strain ATCC 204508 / S288c) OX=559292 GN=UBP11 PE=3 SV=1
24.2892608642578	22.1761207580566	24.1644592285156	NaN	24.2540740966797	NaN	2.11314	4.32632	#VALUE!	#VALUE!	#VALUE!	#VALUE!			8	6	6	26	20.1	20.1	48.544	0	35.389	27.0408246423955	13	2	5	3	0	3	1	22.8709080001383	22.3441600799561	17.736083984375	20.0647373199463	NaN	19.9761734008789	NaN	0	2.05981063842773	0	P36034	P36034	Protein COS9	COS9	sp|P36034|COS9_YEAST Protein COS9 OS=Saccharomyces cerevisiae (strain ATCC 204508 / S288c) OX=559292 GN=COS9 PE=3 SV=1
NaN	NaN	23.7353115081787	NaN	23.437967300415	NaN	#VALUE!	#VALUE!	#VALUE!	#VALUE!	#VALUE!	#VALUE!			1	1	1	11.1	11.1	11.1	28.352	0	10.768	25.0167807489508	1	0	0	1	0	1	0	22.2094343265591	NaN	NaN	21.4589900970459	NaN	20.9075660705566	NaN	0	NaN	0	P36039	P36039	ER membrane protein complex subunit 3	EMC3	sp|P36039|EMC3_YEAST ER membrane protein complex subunit 3 OS=Saccharomyces cerevisiae (strain ATCC 204508 / S288c) OX=559292 GN=EMC3 PE=1 SV=3
23.0457515716553	23.6443843841553	NaN	23.3190689086914	NaN	NaN	-0.598633	0.660379	#VALUE!	#VALUE!	#VALUE!	#VALUE!			4	4	4	18.4	18.4	18.4	30.739	0	2.7814	25.8787203879971	7	4	2	0	1	0	0	22.4192864310406	21.9826278686523	20.2965888977051	NaN	17.4326553344727	NaN	NaN	0	-0.435975074768066	0	P36040	P36040	Proteasome assembly chaperone 2	ADD66	sp|P36040|POC2_YEAST Proteasome assembly chaperone 2 OS=Saccharomyces cerevisiae (strain ATCC 204508 / S288c) OX=559292 GN=ADD66 PE=1 SV=1
25.7973384857178	NaN	22.2050247192383	NaN	22.4265480041504	21.0456027984619	#VALUE!	#VALUE!	#VALUE!	#VALUE!	1.38095	2.60439			16	15	15	15.7	15.1	15.1	139.38	0	48.77	27.5552306213509	18	0	14	3	0	3	2	21.8547557900343	21.7510738372803	NaN	16.5881004333496	NaN	17.143404006958	14.2662744522095	0	2.4307009379069	0	P36044	P36044	Protein MNN4	MNN4	sp|P36044|MNN4_YEAST Protein MNN4 OS=Saccharomyces cerevisiae (strain ATCC 204508 / S288c) OX=559292 GN=MNN4 PE=4 SV=2
20.4255237579346	21.0572853088379	NaN	21.2171478271484	NaN	21.3869018554688	-0.631762	0.645388	#VALUE!	#VALUE!	#VALUE!	#VALUE!			2	2	2	13.7	13.7	13.7	24.135	0	4.326	23.1761512302947	4	2	1	0	1	0	1	19.3687963082371	17.8067512512207	18.0458564758301	NaN	16.2715167999268	NaN	16.5805683135986	0	-0.794921239217121	0	P36054	P36054	Calcipressin-like protein	RCN1	sp|P36054|RCN1_YEAST Calcipressin-like protein OS=Saccharomyces cerevisiae (strain ATCC 204508 / S288c) OX=559292 GN=RCN1 PE=1 SV=1
NaN	NaN	21.1511554718018	21.3251495361328	21.1559181213379	NaN	#VALUE!	#VALUE!	-0.173994	0.886385	#VALUE!	#VALUE!			2	2	2	4	4	4	72.387	0.0048569	1.8032	22.926998816521	1	0	0	2	2	1	1	18.2265627165555	NaN	NaN	17.2400455474854	16.0677490234375	16.1103610992432	13.6080236434937	0	-0.171612739562988	0	P36070	P36070	RNA polymerase I-specific transcription initiation factor RRN3	RRN3	sp|P36070|RRN3_YEAST RNA polymerase I-specific transcription initiation factor RRN3 OS=Saccharomyces cerevisiae (strain ATCC 204508 / S288c) OX=559292 GN=RRN3 PE=1 SV=1
NaN	NaN	NaN	NaN	20.6823463439941	NaN	#VALUE!	#VALUE!	#VALUE!	#VALUE!	#VALUE!	#VALUE!			3	3	3	11.6	11.6	11.6	52.087	0	2.886	20.9593595879146	3	0	0	0	0	3	0	16.9593454361454	NaN	NaN	NaN	NaN	16.9593448638916	NaN	0	NaN	0	P36083	P36083	Uncharacterized protein YKL075C	YKL075C	sp|P36083|YKH5_YEAST Uncharacterized protein YKL075C OS=Saccharomyces cerevisiae (strain ATCC 204508 / S288c) OX=559292 GN=YKL075C PE=1 SV=1
24.5710906982422	23.4472045898438	NaN	NaN	NaN	22.1318855285645	1.12389	2.17933	#VALUE!	#VALUE!	#VALUE!	#VALUE!			6	6	6	26.4	26.4	26.4	32.293	0	13.16	26.3594093620907	7	4	5	1	0	0	3	22.8999727162823	22.4859600067139	20.1998825073242	18.4027042388916	NaN	NaN	18.6154003143311	0	1.78154563903809	0	P36103	P36103	Uncharacterized protein YKL023W	YKL023W	sp|P36103|YKC3_YEAST Uncharacterized protein YKL023W OS=Saccharomyces cerevisiae (strain ATCC 204508 / S288c) OX=559292 GN=YKL023W PE=1 SV=2
21.535306930542	NaN	21.0653953552246	21.130880355835	21.4009857177734	NaN	#VALUE!	#VALUE!	-0.065485	0.955624	#VALUE!	#VALUE!			2	2	2	5.7	5.7	5.7	68.879	0	12.166	23.9276861070031	3	0	1	2	1	1	0	19.4682581048181	17.9947395324707	NaN	17.9795818328857	15.3182601928711	17.3304443359375	NaN	0	0.203015645345051	0	P36115	P36115	Increased rDNA silencing protein 4	IRS4	sp|P36115|IRS4_YEAST Increased rDNA silencing protein 4 OS=Saccharomyces cerevisiae (strain ATCC 204508 / S288c) OX=559292 GN=IRS4 PE=1 SV=1
NaN	22.5547790527344	NaN	23.5996875762939	23.0603733062744	23.4451847076416	#VALUE!	#VALUE!	#VALUE!	#VALUE!	-0.384811	0.765879			6	6	6	13.8	13.8	13.8	85.479	0	15.67	24.8297769218329	15	2	1	1	6	4	4	19.4035155537349	NaN	15.6355476379395	NaN	17.8606014251709	17.7791156768799	17.4547481536865	0	-0.139510472615559	0	P36124	P36124	SET domain-containing protein 3	SET3	sp|P36124|SET3_YEAST SET domain-containing protein 3 OS=Saccharomyces cerevisiae (strain ATCC 204508 / S288c) OX=559292 GN=SET3 PE=1 SV=1
22.5668125152588	NaN	20.71875	NaN	21.1273574829102	NaN	#VALUE!	#VALUE!	#VALUE!	#VALUE!	#VALUE!	#VALUE!			2	2	2	6.5	6.5	6.5	50.98	0	3.3403	24.4846832774394	3	0	1	2	0	2	0	20.4846341133698	20.073263168335	NaN	17.164867401123	NaN	17.7280673980713	NaN	0	NaN	0	P36137	P36137	Protein UIP5	UIP5	sp|P36137|UIP5_YEAST Protein UIP5 OS=Saccharomyces cerevisiae (strain ATCC 204508 / S288c) OX=559292 GN=UIP5 PE=1 SV=1
22.5861415863037	NaN	25.7169094085693	NaN	24.2399444580078	NaN	#VALUE!	#VALUE!	#VALUE!	#VALUE!	#VALUE!	#VALUE!			4	4	4	14.1	14.1	14.1	48.756	0	9.9356	26.7884297976439	13	0	2	3	0	3	0	22.3960538742684	18.9351711273193	NaN	21.6376342773438	NaN	20.7433681488037	NaN	0	NaN	0	P36142	P36142	Transmembrane protein 184 homolog YKR051W	YKR051W	sp|P36142|TM184_YEAST Transmembrane protein 184 homolog YKR051W OS=Saccharomyces cerevisiae (strain ATCC 204508 / S288c) OX=559292 GN=YKR051W PE=1 SV=1
NaN	NaN	22.2444953918457	22.7211303710938	NaN	23.1354579925537	#VALUE!	#VALUE!	-0.476635	0.718652	#VALUE!	#VALUE!			1	1	1	2.2	2.2	2.2	59.351	0.0098311	1.4397	23.9427958247474	1	0	0	1	1	0	1	19.0358515464642	NaN	NaN	17.2930221557617	16.9365234375	NaN	17.9400272369385	0	-0.683798789978027	0	P36146	P36146	Protein LAS1	LAS1	sp|P36146|LAS1_YEAST Protein LAS1 OS=Saccharomyces cerevisiae (strain ATCC 204508 / S288c) OX=559292 GN=LAS1 PE=1 SV=1
NaN	NaN	NaN	21.3018436431885	NaN	NaN	#VALUE!	#VALUE!	#VALUE!	#VALUE!	#VALUE!	#VALUE!			2	2	2	6	6	6	68.281	0	2.6909	22.0747660451	2	0	0	0	1	0	1	17.0747268533229	NaN	NaN	NaN	15.558690071106	NaN	16.4540901184082	0	NaN	0	P36158	P36158	Uncharacterized protein YKR078W	YKR078W	sp|P36158|YK58_YEAST Uncharacterized protein YKR078W OS=Saccharomyces cerevisiae (strain ATCC 204508 / S288c) OX=559292 GN=YKR078W PE=1 SV=1
22.3512153625488	21.5040225982666	NaN	NaN	NaN	NaN	0.847193	1.799	#VALUE!	#VALUE!	#VALUE!	#VALUE!			3	3	3	3.4	3.4	3.4	137.49	0.0081321	1.5776	24.3931626091121	3	2	2	0	0	0	0	18.5351842331353	18.4174900054932	14.8612804412842	NaN	NaN	NaN	NaN	0	0.847192764282227	0	P36168	P36168	EST/SMG-like protein 1	ESL2	sp|P36168|ESL2_YEAST EST/SMG-like protein 2 OS=Saccharomyces cerevisiae (strain ATCC 204508 / S288c) OX=559292 GN=ESL2 PE=1 SV=1
20.0224227905273	NaN	NaN	NaN	21.4233703613281	NaN	#VALUE!	#VALUE!	#VALUE!	#VALUE!	#VALUE!	#VALUE!			3	3	3	25.9	25.9	25.9	17.342	0	3.2165	22.9991728703539	4	1	2	1	0	1	0	19.8292581937515	18.4743309020996	17.5259647369385	NaN	NaN	18.5303916931152	NaN	0	NaN	0	P36527	P36527	54S ribosomal protein L28, mitochondrial	MRPL28	sp|P36527|RM28_YEAST 54S ribosomal protein L28, mitochondrial OS=Saccharomyces cerevisiae (strain ATCC 204508 / S288c) OX=559292 GN=MRPL28 PE=1 SV=2
NaN	NaN	20.0989265441895	21.259370803833	NaN	21.1871910095215	#VALUE!	#VALUE!	-1.16044	0.447375	#VALUE!	#VALUE!			3	3	3	24.9	24.9	24.9	19.986	0.0002613	2.3852	25.9573282740944	5	2	1	1	1	0	1	23.149962280401	22.2717037200928	21.7689476013184	17.8225841522217	17.7088680267334	NaN	17.7759704589844	0	-1.12435436248779	0	P36973	P36973	Adenine phosphoribosyltransferase 2	APT2	sp|P36973|APT2_YEAST Adenine phosphoribosyltransferase 2 OS=Saccharomyces cerevisiae (strain ATCC 204508 / S288c) OX=559292 GN=APT2 PE=1 SV=2
NaN	NaN	20.9499187469482	NaN	21.9531192779541	22.2154006958008	#VALUE!	#VALUE!	#VALUE!	#VALUE!	-0.262281	0.833768			1	1	1	3.8	3.8	3.8	85.395	0	3.4757	23.3812619923601	1	0	0	1	0	1	1	18.2937859468113	NaN	NaN	16.5100231170654	NaN	16.9658966064453	16.60964012146	0	-0.763881683349609	0	P38042	P38042	Anaphase-promoting complex subunit CDC27	CDC27	sp|P38042|CDC27_YEAST Anaphase-promoting complex subunit CDC27 OS=Saccharomyces cerevisiae (strain ATCC 204508 / S288c) OX=559292 GN=CDC27 PE=1 SV=2
NaN	NaN	24.1278610229492	NaN	23.95969581604	NaN	#VALUE!	#VALUE!	#VALUE!	#VALUE!	#VALUE!	#VALUE!			5	5	5	3.2	3.2	3.2	273.34	0	5.1015	25.7331670044308	5	0	0	3	0	4	1	18.7219402663157	NaN	NaN	15.7356357574463	NaN	18.0933666229248	16.5826854705811	0	NaN	0	P38111	P38111	Serine/threonine-protein kinase MEC1	MEC1	sp|P38111|ATR_YEAST Serine/threonine-protein kinase MEC1 OS=Saccharomyces cerevisiae (strain ATCC 204508 / S288c) OX=559292 GN=MEC1 PE=1 SV=1
26.5418701171875	NaN	28.7047729492188	NaN	28.57177734375	21.2759418487549	#VALUE!	#VALUE!	#VALUE!	#VALUE!	7.29584	157.132			7	7	7	19.7	19.7	19.7	53.525	0	96.284	30.4023291096432	27	0	4	7	0	7	1	26.7018690588236	24.5594673156738	NaN	25.3637256622314	NaN	25.2939682006836	16.9463806152344	0	6.6635316212972	0	P38142	P38142	Probable metabolite transport protein YBR241C		sp|P38142|YB91_YEAST Probable metabolite transport protein YBR241C OS=Saccharomyces cerevisiae (strain ATCC 204508 / S288c) OX=559292 GN=YBR241C PE=1 SV=1
21.9865550994873	21.7279586791992	NaN	21.7858428955078	NaN	21.3136825561523	0.258596	1.19631	#VALUE!	#VALUE!	#VALUE!	#VALUE!			3	3	3	17.3	17.3	17.3	22.965	0	4.6083	24.2447418491134	4	1	2	0	1	0	2	20.659793863084	19.9925842285156	18.112174987793	NaN	17.5889339447021	NaN	17.0199813842773	0	0.37739372253418	0	P38162	P38162	Mitochondrial intermembrane space cysteine motif-containing protein MIX23	MIX23	sp|P38162|MIX23_YEAST Mitochondrial intermembrane space cysteine motif-containing protein MIX23 OS=Saccharomyces cerevisiae (strain ATCC 204508 / S288c) OX=559292 GN=MIX23 PE=1 SV=1
NaN	22.6214485168457	NaN	NaN	NaN	22.2684803009033	#VALUE!	#VALUE!	#VALUE!	#VALUE!	#VALUE!	#VALUE!			2	2	2	4.5	4.5	4.5	50.655	0	2.7721	24.3492860888847	3	1	1	1	1	1	2	19.76430468781	NaN	16.572566986084	17.5297813415527	17.913158416748	16.6897525787354	17.9389934539795	0	NaN	0	P38193	P38193	Serine/threonine-protein phosphatase 4 regulatory subunit 2	PSY4	sp|P38193|PP4R2_YEAST Serine/threonine-protein phosphatase 4 regulatory subunit 2 OS=Saccharomyces cerevisiae (strain ATCC 204508 / S288c) OX=559292 GN=PSY4 PE=1 SV=1
20.955249786377	NaN	NaN	NaN	NaN	21.5004768371582	#VALUE!	#VALUE!	#VALUE!	#VALUE!	#VALUE!	#VALUE!			3	3	3	2.6	2.6	2.6	174.18	0	3.1687	22.2304614503783	2	0	1	0	0	0	3	15.7875200068093	14.5413389205933	NaN	NaN	NaN	NaN	14.9977970123291	0	-0.54522705078125	0	P38198	P38198	Protein STU1	STU1	sp|P38198|STU1_YEAST Protein STU1 OS=Saccharomyces cerevisiae (strain ATCC 204508 / S288c) OX=559292 GN=STU1 PE=1 SV=1
23.8654251098633	22.9229774475098	NaN	NaN	NaN	NaN	0.942448	1.92179	#VALUE!	#VALUE!	#VALUE!	#VALUE!			1	1	1	10.4	10.4	10.4	12.401	0	5.0294	25.7126659508105	2	1	1	0	0	0	0	23.7126134786782	23.4872627258301	20.9229583740234	NaN	NaN	NaN	NaN	0	0.942447662353516	0	P38202	P38202	UPF0642 protein YBL028C		sp|P38202|YBC8_YEAST UPF0642 protein YBL028C OS=Saccharomyces cerevisiae (strain ATCC 204508 / S288c) OX=559292 GN=YBL028C PE=1 SV=1
21.5346908569336	21.962646484375	24.192195892334	NaN	24.2362251281738	NaN	-0.427956	0.743314	#VALUE!	#VALUE!	#VALUE!	#VALUE!			3	3	3	8.4	8.4	8.4	66.21	0	23.549	25.9223646337922	7	1	1	3	1	2	0	21.1150233234991	17.3189315795898	16.1249904632568	20.1979656219482	NaN	19.668701171875	NaN	0	1.35839080810547	0	P38206	P38206	Oligosaccharide translocation protein RFT1	RFT1	sp|P38206|RFT1_YEAST Oligosaccharide translocation protein RFT1 OS=Saccharomyces cerevisiae (strain ATCC 204508 / S288c) OX=559292 GN=RFT1 PE=1 SV=1
NaN	NaN	22.3010635375977	22.6949157714844	22.1673259735107	NaN	#VALUE!	#VALUE!	-0.393852	0.761095	#VALUE!	#VALUE!			3	3	3	22	22	22	19.938	0	2.8255	24.7083042563234	2	1	0	1	2	1	2	21.386376161436	NaN	19.7007141113281	18.5813407897949	19.4146842956543	18.059757232666	19.0013256072998	0	-0.460721015930176	0	P38218	P38218	ADP-ribose 1-phosphate phosphatase	POA1	sp|P38218|POA1_YEAST ADP-ribose 1-phosphate phosphatase OS=Saccharomyces cerevisiae (strain ATCC 204508 / S288c) OX=559292 GN=POA1 PE=1 SV=1
22.1296863555908	22.4567356109619	NaN	22.8513278961182	NaN	22.4357566833496	-0.327049	0.797165	#VALUE!	#VALUE!	#VALUE!	#VALUE!			4	4	4	14.9	14.9	14.9	62.593	0	7.6654	24.3940135828672	5	1	1	0	3	0	3	19.7501246726125	18.2998790740967	16.7321147918701	NaN	18.1698169708252	NaN	17.2453479766846	0	-0.451587041219074	0	P38222	P38222	Ribosomal lysine N-methyltransferase 3	RKM3	sp|P38222|RKM3_YEAST Ribosomal lysine N-methyltransferase 3 OS=Saccharomyces cerevisiae (strain ATCC 204508 / S288c) OX=559292 GN=RKM3 PE=1 SV=1
23.1112861633301	22.5348320007324	NaN	NaN	NaN	20.242374420166	0.576454	1.49118	#VALUE!	#VALUE!	#VALUE!	#VALUE!			5	5	5	7.1	7.1	7.1	77.286	0.0038481	1.8911	26.651573356279	6	1	4	1	1	1	1	21.8442184342214	20.5193176269531	16.4459838867188	17.4561939239502	20.0120906829834	19.8280811309814	12.2377777099609	0	1.72268295288086	0	P38227	P38227	Quinidine resistance protein 3	QDR3	sp|P38227|QDR3_YEAST Quinidine resistance protein 3 OS=Saccharomyces cerevisiae (strain ATCC 204508 / S288c) OX=559292 GN=QDR3 PE=1 SV=2
NaN	NaN	NaN	NaN	NaN	21.9877014160156	#VALUE!	#VALUE!	#VALUE!	#VALUE!	#VALUE!	#VALUE!			2	2	2	4.7	4.7	4.7	64.251	0.0033419	1.9439	22.7983381053859	1	0	0	1	1	2	1	17.8914277312526	NaN	NaN	16.1063175201416	15.2264499664307	15.3935918807983	16.4769668579102	0	NaN	0	P38228	P38228	Mitochondrial chaperone TCM62	TCM62	sp|P38228|TCM62_YEAST Mitochondrial chaperone TCM62 OS=Saccharomyces cerevisiae (strain ATCC 204508 / S288c) OX=559292 GN=TCM62 PE=1 SV=2
NaN	NaN	NaN	23.4728355407715	21.7893104553223	22.8874206542969	#VALUE!	#VALUE!	#VALUE!	#VALUE!	-1.09811	0.467128			4	4	4	31.7	31.7	31.7	20.596	0	5.0951	23.8119602367493	4	0	0	0	3	1	3	20.4900321418619	NaN	NaN	NaN	19.5930633544922	16.3381443023682	19.1922454833984	0	-1.39081764221191	0	P38239	P38239	Uncharacterized RING finger protein YBR062C		sp|P38239|YBR2_YEAST Uncharacterized RING finger protein YBR062C OS=Saccharomyces cerevisiae (strain ATCC 204508 / S288c) OX=559292 GN=YBR062C PE=1 SV=2
22.6202640533447	NaN	22.2065448760986	NaN	21.6464080810547	NaN	#VALUE!	#VALUE!	#VALUE!	#VALUE!	#VALUE!	#VALUE!			2	2	2	17.5	17.5	17.5	23.548	0	5.7718	24.8770826366112	4	0	1	2	0	1	0	21.0697277145536	20.4348163604736	NaN	18.9302406311035	NaN	18.11598777771	NaN	0	NaN	0	P38243	P38243	Uncharacterized protein YBR071W		sp|P38243|YBS1_YEAST Uncharacterized protein YBR071W OS=Saccharomyces cerevisiae (strain ATCC 204508 / S288c) OX=559292 GN=YBR071W PE=1 SV=1
24.0860214233398	NaN	24.0959529876709	22.6274738311768	25.1523628234863	NaN	#VALUE!	#VALUE!	1.46848	2.7673	#VALUE!	#VALUE!			7	7	7	27.9	27.9	27.9	40.453	0	22.637	26.8664388605162	14	0	4	6	1	7	0	22.6185172428311	20.8741760253906	NaN	20.9502735137939	16.8738765716553	21.17724609375	NaN	0	1.81730524698893	0	P38270	P38270	Autophagy-related protein 14	ATG14	sp|P38270|ATG14_YEAST Autophagy-related protein 14 OS=Saccharomyces cerevisiae (strain ATCC 204508 / S288c) OX=559292 GN=ATG14 PE=1 SV=1
25.7273349761963	NaN	24.8150424957275	NaN	24.9125995635986	NaN	#VALUE!	#VALUE!	#VALUE!	#VALUE!	#VALUE!	#VALUE!			13	13	13	24.8	24.8	24.8	60.468	0	24.323	27.9833213078484	29	0	12	7	1	7	0	23.3394651180737	22.8958930969238	NaN	20.4311466217041	NaN	20.4123516082764	NaN	0	NaN	0	P38277	P38277	Uncharacterized protein YBR138C		sp|P38277|YBY8_YEAST Uncharacterized protein YBR138C OS=Saccharomyces cerevisiae (strain ATCC 204508 / S288c) OX=559292 GN=YBR138C PE=1 SV=2
27.1360416412354	21.1608486175537	NaN	NaN	22.1706924438477	NaN	5.97519	62.9089	#VALUE!	#VALUE!	#VALUE!	#VALUE!			12	12	12	30.6	30.6	30.6	44.381	0	29.547	28.7878073292213	16	2	12	0	0	1	0	24.7878073292213	24.7656726837158	17.2853660583496	NaN	NaN	18.098258972168	NaN	0	3.49251842498779	0	P38287	P38287	Mannosyl phosphorylinositol ceramide synthase CSH1	CSH1	sp|P38287|CSH1_YEAST Mannosyl phosphorylinositol ceramide synthase CSH1 OS=Saccharomyces cerevisiae (strain ATCC 204508 / S288c) OX=559292 GN=CSH1 PE=1 SV=1
22.5173721313477	NaN	24.3576316833496	NaN	24.9411392211914	NaN	#VALUE!	#VALUE!	#VALUE!	#VALUE!	#VALUE!	#VALUE!			5	5	5	16.8	16.8	16.8	30.34	0	50.636	26.4775832570901	23	0	2	4	0	5	0	23.3077200115487	19.5740585327148	NaN	22.1703243255615	NaN	22.2190990447998	NaN	0	NaN	0	P38301	P38301	GCR1-dependent translation factor 1	GDT1	sp|P38301|GDT1_YEAST GCR1-dependent translation factor 1 OS=Saccharomyces cerevisiae (strain ATCC 204508 / S288c) OX=559292 GN=GDT1 PE=1 SV=1
23.4998435974121	NaN	NaN	NaN	22.2449016571045	NaN	#VALUE!	#VALUE!	#VALUE!	#VALUE!	#VALUE!	#VALUE!			4	4	4	31.8	31.8	31.8	24.203	0	5.8767	25.5479556751666	7	0	4	0	0	1	0	21.8475100753043	21.7940406799316	NaN	NaN	NaN	17.0671825408936	NaN	0	NaN	0	P38306	P38306	Uncharacterized protein YBR197C		sp|P38306|YB47_YEAST Uncharacterized protein YBR197C OS=Saccharomyces cerevisiae (strain ATCC 204508 / S288c) OX=559292 GN=YBR197C PE=1 SV=1
23.0873012542725	21.0416641235352	23.1224994659424	NaN	23.8359565734863	NaN	2.04564	4.12856	#VALUE!	#VALUE!	#VALUE!	#VALUE!			3	3	3	9.2	9.2	9.2	16.347	0	8.672	26.0521693431693	8	1	3	2	0	2	0	24.467186107964	23.7299308776855	18.3361663818359	21.8738765716553	NaN	22.2837619781494	NaN	0	2.3069216410319	0	P38312	P38312	ER-derived vesicles protein ERV15	ERV15	sp|P38312|ERV15_YEAST ER-derived vesicles protein ERV15 OS=Saccharomyces cerevisiae (strain ATCC 204508 / S288c) OX=559292 GN=ERV15 PE=1 SV=1
NaN	NaN	NaN	22.8148574829102	NaN	22.477611541748	#VALUE!	#VALUE!	#VALUE!	#VALUE!	#VALUE!	#VALUE!			2	2	2	5.2	5.2	5.2	77.74	0	4.1115	22.9429926441331	3	0	0	0	2	0	1	17.4835323988902	NaN	NaN	NaN	17.117359161377	NaN	15.3262186050415	0	NaN	0	P38315	P38315	YAP1-binding protein 1	YBP1	sp|P38315|YBP1_YEAST YAP1-binding protein 1 OS=Saccharomyces cerevisiae (strain ATCC 204508 / S288c) OX=559292 GN=YBP1 PE=1 SV=1
NaN	21.6691246032715	NaN	NaN	NaN	21.2921581268311	#VALUE!	#VALUE!	#VALUE!	#VALUE!	#VALUE!	#VALUE!			2	2	2	8.3	8.3	8.3	34.343	0	2.7874	22.7394798521777	3	1	0	0	0	1	2	18.5695589711261	NaN	17.4991912841797	NaN	NaN	16.7458324432373	16.5184078216553	0	NaN	0	P38326	P38326	SWR1-complex protein 5	SWC5	sp|P38326|SWC5_YEAST SWR1-complex protein 5 OS=Saccharomyces cerevisiae (strain ATCC 204508 / S288c) OX=559292 GN=SWC5 PE=1 SV=1
22.0059719085693	22.0250949859619	NaN	NaN	NaN	NaN	-0.0191231	0.986832	#VALUE!	#VALUE!	#VALUE!	#VALUE!			2	2	2	12	12	12	19.7	0	3.9055	24.1194946368138	3	1	1	1	0	0	0	21.1195262988177	20.6278285980225	19.025074005127	16.9257869720459	NaN	NaN	NaN	0	-0.0191230773925781	0	P38334	P38334	Trafficking protein particle complex subunit 20	TRS20	sp|P38334|TRS20_YEAST Trafficking protein particle complex subunit 20 OS=Saccharomyces cerevisiae (strain ATCC 204508 / S288c) OX=559292 GN=TRS20 PE=1 SV=1
NaN	25.1935882568359	NaN	NaN	NaN	25.2195949554443	#VALUE!	#VALUE!	#VALUE!	#VALUE!	#VALUE!	#VALUE!			4	4	4	12.6	12.6	12.6	47.976	0	4.4292	26.1851419043919	5	4	0	0	0	0	1	22.0152244664048	NaN	21.9728813171387	NaN	NaN	NaN	16.9030113220215	0	NaN	0	P38347	P38347	Protein-lysine N-methyltransferase EFM2	EFM2	sp|P38347|EFM2_YEAST Protein-lysine N-methyltransferase EFM2 OS=Saccharomyces cerevisiae (strain ATCC 204508 / S288c) OX=559292 GN=EFM2 PE=1 SV=1
NaN	NaN	NaN	NaN	NaN	20.9215793609619	#VALUE!	#VALUE!	#VALUE!	#VALUE!	#VALUE!	#VALUE!			2	2	2	4.2	4.2	4.2	70.495	0.0012943	2.1423	23.2732697332516	1	1	1	0	1	0	1	18.1858239685824	17.6265640258789	15.8084115982056	NaN	NaN	NaN	15.230320930481	0	NaN	0	P38352	P38352	SCF-associated factor 1	SAF1	sp|P38352|SAF1_YEAST SCF-associated factor 1 OS=Saccharomyces cerevisiae (strain ATCC 204508 / S288c) OX=559292 GN=SAF1 PE=1 SV=2
25.9122104644775	23.3201713562012	NaN	NaN	NaN	NaN	2.59204	6.0295	#VALUE!	#VALUE!	#VALUE!	#VALUE!			7	7	7	14.3	14.3	14.3	62.653	0	42.627	27.6979649625339	8	2	7	0	0	0	0	23.6104292326309	23.5819892883301	17.9354305267334	NaN	NaN	NaN	NaN	0	2.59203910827637	0	P38361	P38361	Phosphate permease PHO89	PHO89	sp|P38361|PHO89_YEAST Phosphate permease PHO89 OS=Saccharomyces cerevisiae (strain ATCC 204508 / S288c) OX=559292 GN=PHO89 PE=1 SV=1
19.4996395111084	20.7873191833496	NaN	NaN	NaN	20.5231513977051	-1.28768	0.409609	#VALUE!	#VALUE!	#VALUE!	#VALUE!			2	2	2	6.7	6.7	6.7	36.031	0.0018069	2.073	22.8275691000676	2	1	2	0	0	0	1	18.657632469568	18.2176933288574	16.1877002716064	NaN	NaN	NaN	15.0554943084717	0	-1.15559577941895	0	P38430	P38430	Uncharacterized deoxyribonuclease YMR262W		sp|P38430|YM8C_YEAST Uncharacterized deoxyribonuclease YMR262W OS=Saccharomyces cerevisiae (strain ATCC 204508 / S288c) OX=559292 GN=YMR262W PE=1 SV=3
28.4475040435791	21.019437789917	NaN	NaN	19.1853408813477	NaN	7.42807	172.215	#VALUE!	#VALUE!	#VALUE!	#VALUE!			16	16	16	20.2	20.2	20.2	69.566	0	101.23	30.0525839702855	26	5	16	0	0	1	0	25.9651457437729	25.9514713287354	19.1180191040039	NaN	NaN	15.5961313247681	NaN	0	2.79698467254639	0	P38724	P38724	Siderophore iron transporter ARN2	ARN2	sp|P38724|ARN2_YEAST Siderophore iron transporter ARN2 OS=Saccharomyces cerevisiae (strain ATCC 204508 / S288c) OX=559292 GN=ARN2 PE=3 SV=2
26.8476867675781	20.3588523864746	20.430534362793	NaN	20.9233951568604	NaN	6.48883	89.8119	#VALUE!	#VALUE!	#VALUE!	#VALUE!			10	10	10	20.3	20.3	20.3	70.898	0	41.218	28.463924494613	16	2	10	2	0	3	0	24.1420353646293	24.1045360565186	17.7272033691406	16.745044708252	NaN	17.1699638366699	NaN	0	2.37501970926921	0	P38731	P38731	Siderophore iron transporter ARN1	ARN1	sp|P38731|ARN1_YEAST Siderophore iron transporter ARN1 OS=Saccharomyces cerevisiae (strain ATCC 204508 / S288c) OX=559292 GN=ARN1 PE=1 SV=1
22.4826908111572	NaN	NaN	NaN	NaN	NaN	#VALUE!	#VALUE!	#VALUE!	#VALUE!	#VALUE!	#VALUE!			3	3	3	6.4	6.4	6.4	60.619	0.0091139	1.5181	24.1045360499203	3	0	3	0	0	0	0	19.5809724942448	19.5809726715088	NaN	NaN	NaN	NaN	NaN	0	NaN	0	P38734	P38734	Low-affinity methionine permease	MUP3	sp|P38734|MUP3_YEAST Low-affinity methionine permease OS=Saccharomyces cerevisiae (strain ATCC 204508 / S288c) OX=559292 GN=MUP3 PE=1 SV=1
25.0926494598389	NaN	21.9565620422363	NaN	21.2185096740723	19.6738166809082	#VALUE!	#VALUE!	#VALUE!	#VALUE!	1.54469	2.91742			6	6	6	15	15	15	63.807	0	80.388	26.7668610737042	16	0	6	3	0	1	1	22.7668459126293	22.5760478973389	NaN	19.2999229431152	NaN	17.6775550842285	14.8240633010864	0	3.08209037780762	0	P38739	P38739	Cell wall integrity and stress response component 4	WSC4	sp|P38739|WSC4_YEAST Cell wall integrity and stress response component 4 OS=Saccharomyces cerevisiae (strain ATCC 204508 / S288c) OX=559292 GN=WSC4 PE=3 SV=1
20.3226757049561	NaN	NaN	NaN	NaN	NaN	#VALUE!	#VALUE!	#VALUE!	#VALUE!	#VALUE!	#VALUE!			1	1	1	3.8	3.8	3.8	35.717	0.0095887	1.4559	21.9444947437684	1	0	1	0	0	0	0	18.2440478764766	18.244047164917	NaN	NaN	NaN	NaN	NaN	0	NaN	0	P38740	P38740	Uncharacterized protein YHL026C	YHL026C	sp|P38740|YHC6_YEAST Uncharacterized protein YHL026C OS=Saccharomyces cerevisiae (strain ATCC 204508 / S288c) OX=559292 GN=YHL026C PE=1 SV=2
NaN	20.2472515106201	22.1645984649658	NaN	21.5248737335205	NaN	#VALUE!	#VALUE!	#VALUE!	#VALUE!	#VALUE!	#VALUE!			1	1	1	3.4	3.4	3.4	61.205	0.0088765	1.5332	23.4792651606411	2	1	0	1	0	1	0	19.7787958332677	NaN	16.5468349456787	18.9952087402344	NaN	18.101390838623	NaN	0	1.59748458862305	0	P38745	P38745	Uncharacterized membrane protein YHL071W	YHL017W	sp|P38745|YHB7_YEAST Uncharacterized membrane protein YHL071W OS=Saccharomyces cerevisiae (strain ATCC 204508 / S288c) OX=559292 GN=YHL017W PE=1 SV=1
22.6205997467041	22.9575366973877	NaN	NaN	NaN	21.933406829834	-0.336937	0.79172	#VALUE!	#VALUE!	#VALUE!	#VALUE!			4	4	4	12.3	12.3	12.3	67.503	0	5.6341	24.9102218342328	6	3	2	0	0	0	2	20.2663656444581	19.6045455932617	18.6928882598877	NaN	NaN	NaN	15.2970952987671	0	0.175127983093262	0	P38748	P38748	RING finger protein ETP1	ETP1	sp|P38748|ETP1_YEAST RING finger protein ETP1 OS=Saccharomyces cerevisiae (strain ATCC 204508 / S288c) OX=559292 GN=ETP1 PE=1 SV=1
22.4972629547119	21.7543392181396	NaN	NaN	NaN	NaN	0.742924	1.67356	#VALUE!	#VALUE!	#VALUE!	#VALUE!			3	3	3	7.9	7.9	7.9	75.919	0	4.174	24.483945640419	4	2	3	0	0	0	0	19.3546411033995	19.1771125793457	16.2443084716797	NaN	NaN	NaN	NaN	0	0.742923736572266	0	P38760	P38760	RNA-binding protein MIP6	MIP6	sp|P38760|MIP6_YEAST RNA-binding protein MIP6 OS=Saccharomyces cerevisiae (strain ATCC 204508 / S288c) OX=559292 GN=MIP6 PE=1 SV=1
22.0360050201416	NaN	NaN	NaN	NaN	NaN	#VALUE!	#VALUE!	#VALUE!	#VALUE!	#VALUE!	#VALUE!			1	1	1	2.8	2.8	2.8	64.208	0.0012967	2.1961	23.6578548590448	1	0	1	0	0	0	0	19.4099088144541	19.4099082946777	NaN	NaN	NaN	NaN	NaN	0	NaN	0	P38767	P38767	Ethionine resistance-conferring protein 1	ERC1	sp|P38767|ERC1_YEAST Ethionine resistance-conferring protein 1 OS=Saccharomyces cerevisiae (strain ATCC 204508 / S288c) OX=559292 GN=ERC1 PE=1 SV=1
22.1057186126709	23.7402629852295	NaN	21.086799621582	NaN	21.0409965515137	-1.63454	0.322072	#VALUE!	#VALUE!	#VALUE!	#VALUE!			6	6	6	22.4	22.4	22.4	42.333	0	12.788	24.9249259199365	12	5	2	2	1	0	1	20.7549918600094	19.6873111724854	19.6147708892822	NaN	15.9014329910278	NaN	15.9044227600098	0	0.149698893229168	0	P38772	P38772	Box C/D snoRNA protein 1	BCD1	sp|P38772|BCD1_YEAST Box C/D snoRNA protein 1 OS=Saccharomyces cerevisiae (strain ATCC 204508 / S288c) OX=559292 GN=BCD1 PE=1 SV=1
25.5220813751221	22.802188873291	NaN	NaN	NaN	NaN	2.71989	6.58824	#VALUE!	#VALUE!	#VALUE!	#VALUE!			7	7	7	24.6	24.6	24.6	59.768	0	68.269	27.2692796614525	10	2	7	1	0	0	0	23.9473515665651	23.9079322814941	18.7326107025146	NaN	NaN	NaN	NaN	0	2.71989250183105	0	P38778	P38778	Manganese transporter SMF2	SMF2	sp|P38778|SMF2_YEAST Manganese transporter SMF2 OS=Saccharomyces cerevisiae (strain ATCC 204508 / S288c) OX=559292 GN=SMF2 PE=3 SV=1
NaN	22.07541847229	NaN	21.641565322876	NaN	22.0834922790527	#VALUE!	#VALUE!	#VALUE!	#VALUE!	#VALUE!	#VALUE!			2	2	2	7.5	7.5	7.5	44.887	0.0023202	2.0316	23.2082438858274	3	1	0	0	1	0	2	18.960307440366	NaN	18.0536708831787	NaN	14.9672260284424	NaN	17.6520042419434	0	NaN	0	P38796	P38796	Protein phosphatase methylesterase 1	PPE1	sp|P38796|PPME1_YEAST Protein phosphatase methylesterase 1 OS=Saccharomyces cerevisiae (strain ATCC 204508 / S288c) OX=559292 GN=PPE1 PE=1 SV=1
NaN	NaN	22.2283782958984	NaN	22.4168148040771	NaN	#VALUE!	#VALUE!	#VALUE!	#VALUE!	#VALUE!	#VALUE!			6	6	6	13.6	13.6	13.6	63.33	0	11.291	25.1220649119296	11	4	2	3	0	2	0	20.5985069066162	17.8905963897705	19.4692115783691	18.6205635070801	NaN	17.7198028564453	NaN	0	NaN	0	P38799	P38799	Uncharacterized protein YHR078W	YHR078W	sp|P38799|YHN8_YEAST Uncharacterized protein YHR078W OS=Saccharomyces cerevisiae (strain ATCC 204508 / S288c) OX=559292 GN=YHR078W PE=4 SV=1
NaN	NaN	19.8645057678223	20.3204746246338	20.0972557067871	NaN	#VALUE!	#VALUE!	-0.455969	0.72902	#VALUE!	#VALUE!			2	2	2	8.2	8.2	8.2	32.086	0	3.3271	21.7474308692456	3	0	1	1	1	1	0	17.8405812505608	NaN	NaN	16.4886722564697	15.6704349517822	16.4673347473145	NaN	0	-0.339593887329102	0	P38806	P38806	Chromatin modification-related protein YNG2	YNG2	sp|P38806|YNG2_YEAST Chromatin modification-related protein YNG2 OS=Saccharomyces cerevisiae (strain ATCC 204508 / S288c) OX=559292 GN=YNG2 PE=1 SV=1
NaN	21.0767250061035	NaN	21.8289642333984	NaN	21.3399543762207	#VALUE!	#VALUE!	#VALUE!	#VALUE!	#VALUE!	#VALUE!			2	2	2	6	6	6	50.295	0	4.7777	22.5631152569062	4	2	1	0	2	0	2	17.8081974892354	NaN	16.3293762207031	NaN	16.2732315063477	NaN	16.0525684356689	0	NaN	0	P38826	P38826	Origin recognition complex subunit 6	ORC6	sp|P38826|ORC6_YEAST Origin recognition complex subunit 6 OS=Saccharomyces cerevisiae (strain ATCC 204508 / S288c) OX=559292 GN=ORC6 PE=1 SV=2
NaN	21.0665130615234	NaN	21.6964244842529	NaN	22.3304653167725	#VALUE!	#VALUE!	#VALUE!	#VALUE!	#VALUE!	#VALUE!			1	1	1	6.5	6.5	6.5	25.675	0	2.9352	22.8758085847268	3	1	1	0	1	0	1	20.0684161735171	NaN	18.2591648101807	NaN	18.1459426879883	NaN	18.919282913208	0	NaN	0	P38829	P38829	MIP18 family protein YHR122W	YHR122W	sp|P38829|YHS2_YEAST MIP18 family protein YHR122W OS=Saccharomyces cerevisiae (strain ATCC 204508 / S288c) OX=559292 GN=YHR122W PE=1 SV=1
27.8022422790527	23.1389923095703	NaN	NaN	NaN	NaN	4.66325	25.3383	#VALUE!	#VALUE!	#VALUE!	#VALUE!			7	7	7	37.8	37.8	37.8	17.036	0	71.479	29.4648204212531	10	2	7	0	0	0	0	26.6574460284444	26.6500663757324	19.0353679656982	NaN	NaN	NaN	NaN	0	4.66324996948242	0	P38839	P38839	Putative cyclin-dependent kinase inhibitor SPL2	SPL2	sp|P38839|SPL2_YEAST Putative cyclin-dependent kinase inhibitor SPL2 OS=Saccharomyces cerevisiae (strain ATCC 204508 / S288c) OX=559292 GN=SPL2 PE=1 SV=1
25.6794929504395	NaN	23.3915252685547	20.6961688995361	23.4358081817627	NaN	#VALUE!	#VALUE!	2.69536	6.47714	#VALUE!	#VALUE!			6	6	6	15.6	15.6	15.6	59.818	0	34.016	27.5406734159431	11	0	5	4	1	3	0	23.2927754595629	23.0294818878174	NaN	19.8282051086426	14.645658493042	19.5310382843018	NaN	0	3.47277323404948	0	P38849	P38849	Maintenance of telomere capping protein 6	MTC6	sp|P38849|MTC6_YEAST Maintenance of telomere capping protein 6 OS=Saccharomyces cerevisiae (strain ATCC 204508 / S288c) OX=559292 GN=MTC6 PE=3 SV=1
22.9388904571533	22.6712646484375	23.8943023681641	NaN	22.6686058044434	NaN	0.267626	1.20383	#VALUE!	#VALUE!	#VALUE!	#VALUE!			10	10	10	10.2	10.2	10.2	143.58	0	17.91	26.1087488841581	15	4	7	5	0	5	0	20.0001705967028	19.1290321350098	16.8720741271973	17.7462253570557	NaN	17.0488910675049	NaN	0	0.496001561482746	0	P38851	P38851	Protein YSP1	YSP1	sp|P38851|LAM1_YEAST Membrane-anchored lipid-binding protein LAM1 OS=Saccharomyces cerevisiae (strain ATCC 204508 / S288c) OX=559292 GN=LAM1 PE=1 SV=1
24.5070018768311	22.7360553741455	24.4914894104004	NaN	24.4550685882568	NaN	1.77095	3.41278	#VALUE!	#VALUE!	#VALUE!	#VALUE!			3	3	3	24	24	24	14.555	0	6.292	27.5043824639565	11	2	2	2	2	2	2	24.6970502744533	24.3942108154297	19.5218486785889	21.1325759887695	16.3356170654297	20.8419170379639	17.0504856109619	0	1.74846458435059	0	P38857;P53311	P38857	Mitochondrial pyruvate carrier 2	MPC2	sp|P38857|MPC2_YEAST Mitochondrial pyruvate carrier 2 OS=Saccharomyces cerevisiae (strain ATCC 204508 / S288c) OX=559292 GN=MPC2 PE=1 SV=1
21.5845375061035	22.0805683135986	20.6605777740479	NaN	21.7913799285889	NaN	-0.496031	0.709055	#VALUE!	#VALUE!	#VALUE!	#VALUE!			5	5	5	13.7	13.7	13.7	57.846	0.00026171	2.45	24.6587811130448	7	2	4	2	0	1	0	20.0149521570343	19.5368537902832	17.501293182373	16.4000797271729	NaN	14.7126340866089	NaN	0	-0.735069910685223	0	P38860	P38860	GTPase MTG2, mitochondrial	MTG2	sp|P38860|MTG2_YEAST GTPase MTG2, mitochondrial OS=Saccharomyces cerevisiae (strain ATCC 204508 / S288c) OX=559292 GN=MTG2 PE=1 SV=2
21.5615081787109	23.6937046051025	NaN	22.6175765991211	NaN	22.5251846313477	-2.1322	0.22811	#VALUE!	#VALUE!	#VALUE!	#VALUE!			5	5	5	11.1	11.1	11.1	71.427	0	6.8777	24.8558585208424	9	5	4	0	3	0	3	19.607926256057	17.7606544494629	18.5427227020264	NaN	16.6778297424316	NaN	16.4619903564453	0	-1.38398043314616	0	P38862	P38862	Ubiquitin-like modifier-activating enzyme ATG7	ATG7	sp|P38862|ATG7_YEAST Ubiquitin-like modifier-activating enzyme ATG7 OS=Saccharomyces cerevisiae (strain ATCC 204508 / S288c) OX=559292 GN=ATG7 PE=1 SV=1
24.6248321533203	25.0269870758057	NaN	NaN	NaN	NaN	-0.402155	0.756727	#VALUE!	#VALUE!	#VALUE!	#VALUE!			4	4	4	20.3	20.3	20.3	33.785	0	13.027	26.5081965171248	6	3	3	0	0	0	0	22.4207261182832	21.5561370849609	21.271276473999	NaN	NaN	NaN	NaN	0	-0.402154922485352	0	P38892	P38892	Probable S-adenosylmethionine-dependent methyltransferase CRG1	CRG1	sp|P38892|CRG1_YEAST Probable S-adenosylmethionine-dependent methyltransferase CRG1 OS=Saccharomyces cerevisiae (strain ATCC 204508 / S288c) OX=559292 GN=CRG1 PE=1 SV=1
20.9907169342041	20.8459796905518	NaN	NaN	NaN	NaN	0.144737	1.10553	#VALUE!	#VALUE!	#VALUE!	#VALUE!			1	1	1	6	6	6	31.026	0	2.7816	22.9842800674188	1	1	1	0	0	0	0	19.1769425319423	18.8051776885986	17.0386409759521	NaN	NaN	NaN	NaN	0	0.144737243652344	0	P38921	P38921	Putative mitochondrial carrier protein PET8	PET8	sp|P38921|PET8_YEAST Putative mitochondrial carrier protein PET8 OS=Saccharomyces cerevisiae (strain ATCC 204508 / S288c) OX=559292 GN=PET8 PE=1 SV=1
26.7369899749756	22.3332538604736	20.6940441131592	NaN	NaN	NaN	4.40374	21.1669	#VALUE!	#VALUE!	#VALUE!	#VALUE!			7	7	7	18.2	18.2	18.2	60.873	0	44.439	28.3556928576753	12	4	7	1	0	0	0	24.3556844574352	24.3064002990723	19.2120742797852	16.7922058105469	NaN	NaN	NaN	0	1.38226318359375	0	P38954	P38954	Inositolphosphotransferase 1	IPT1	sp|P38954|IPT1_YEAST Inositolphosphotransferase 1 OS=Saccharomyces cerevisiae (strain ATCC 204508 / S288c) OX=559292 GN=IPT1 PE=1 SV=2
NaN	NaN	21.3971252441406	19.7834396362305	21.8211975097656	NaN	#VALUE!	#VALUE!	1.61369	3.06033	#VALUE!	#VALUE!			2	2	2	27.9	27.9	27.9	13.187	0.0038531	1.929	23.1014615105205	4	0	0	1	1	2	0	20.7795654758791	NaN	NaN	19.2557334899902	16.3678760528564	20.0551013946533	NaN	0	1.82572174072266	0	P38958	P38958	Protein PET100, mitochondrial	PET100	sp|P38958|PT100_YEAST Protein PET100, mitochondrial OS=Saccharomyces cerevisiae (strain ATCC 204508 / S288c) OX=559292 GN=PET100 PE=1 SV=1
26.631591796875	20.9310626983643	NaN	NaN	NaN	NaN	5.70053	52.0032	#VALUE!	#VALUE!	#VALUE!	#VALUE!			12	12	12	12.8	12.8	12.8	65.404	0	25.654	28.2492072931186	15	2	12	0	0	0	0	24.3423166975101	24.3267688751221	17.796838760376	NaN	NaN	NaN	NaN	0	5.70052909851074	0	P38967	P38967	Tryptophan permease	TAT2	sp|P38967|TAT2_YEAST Tryptophan permease OS=Saccharomyces cerevisiae (strain ATCC 204508 / S288c) OX=559292 GN=TAT2 PE=1 SV=1
NaN	NaN	20.6433277130127	NaN	20.7741050720215	NaN	#VALUE!	#VALUE!	#VALUE!	#VALUE!	#VALUE!	#VALUE!			2	2	2	15.1	15.1	15.1	27.296	0	12.544	22.1140701896974	4	0	1	1	0	1	0	18.3067025549342	NaN	NaN	17.3670902252197	NaN	17.2437686920166	NaN	0	NaN	0	P38987	P38987	Protein TEM1	TEM1	sp|P38987|TEM1_YEAST Protein TEM1 OS=Saccharomyces cerevisiae (strain ATCC 204508 / S288c) OX=559292 GN=TEM1 PE=1 SV=1
NaN	NaN	23.0496788024902	NaN	22.6256904602051	NaN	#VALUE!	#VALUE!	#VALUE!	#VALUE!	#VALUE!	#VALUE!			6	6	6	12.9	12.9	12.9	95.421	0	33.198	25.4478674352674	7	1	3	2	0	1	0	20.4478863478797	19.5444965362549	14.7982692718506	18.5807151794434	NaN	17.9026584625244	NaN	0	NaN	0	P39016	P39016	Suppressor protein MPT5	MPT5	sp|P39016|MPT5_YEAST Suppressor protein MPT5 OS=Saccharomyces cerevisiae (strain ATCC 204508 / S288c) OX=559292 GN=MPT5 PE=1 SV=2
NaN	NaN	21.1911716461182	NaN	21.6457042694092	NaN	#VALUE!	#VALUE!	#VALUE!	#VALUE!	#VALUE!	#VALUE!			2	2	2	2.8	2.8	2.8	83.437	0	3.1656	22.8095679672612	3	0	0	2	0	2	0	17.5616757784443	NaN	NaN	16.2398777008057	NaN	16.8245105743408	NaN	0	NaN	0	P39518	P39518	Long-chain-fatty-acid--CoA ligase 2	FAA2	sp|P39518|LCF2_YEAST Long-chain-fatty-acid--CoA ligase 2 OS=Saccharomyces cerevisiae (strain ATCC 204508 / S288c) OX=559292 GN=FAA2 PE=1 SV=1
NaN	NaN	NaN	22.0008583068848	NaN	21.2474822998047	#VALUE!	#VALUE!	#VALUE!	#VALUE!	#VALUE!	#VALUE!			2	2	2	3	3	3	122.49	0.00052151	2.3411	21.9583686286679	3	0	0	0	2	0	1	17.203520069894	NaN	NaN	NaN	16.8557453155518	NaN	14.9804077148438	0	NaN	0	P39520	P39520	Protein IFH1	IFH1	sp|P39520|IFH1_YEAST Protein IFH1 OS=Saccharomyces cerevisiae (strain ATCC 204508 / S288c) OX=559292 GN=IFH1 PE=1 SV=1
NaN	NaN	NaN	20.6217613220215	NaN	21.9362850189209	#VALUE!	#VALUE!	#VALUE!	#VALUE!	#VALUE!	#VALUE!			3	3	3	6.3	6.3	6.3	103.5	0.0073942	1.6816	21.810411596966	2	0	1	0	1	0	2	16.225452234411	NaN	NaN	NaN	12.2992362976074	NaN	16.1272888183594	0	NaN	0	P39521	P39521	Pre-rRNA-processing protein FHL1	FHL1	sp|P39521|FHL1_YEAST Pre-rRNA-processing protein FHL1 OS=Saccharomyces cerevisiae (strain ATCC 204508 / S288c) OX=559292 GN=FHL1 PE=1 SV=1
NaN	21.1296234130859	22.2769641876221	NaN	21.5452880859375	NaN	#VALUE!	#VALUE!	#VALUE!	#VALUE!	#VALUE!	#VALUE!			2	2	2	7.2	7.2	7.2	45.937	0.0010419	2.3201	23.7255684636276	3	1	0	2	0	1	0	19.7256225467766	NaN	16.4470500946045	19.1742134094238	NaN	17.5052528381348	NaN	0	0.781502723693848	0	P39542	P39542	Uncharacterized transporter YJL193W		sp|P39542|YJT3_YEAST Uncharacterized transporter YJL193W OS=Saccharomyces cerevisiae (strain ATCC 204508 / S288c) OX=559292 GN=YJL193W PE=1 SV=1
NaN	NaN	21.1598644256592	NaN	21.2146015167236	NaN	#VALUE!	#VALUE!	#VALUE!	#VALUE!	#VALUE!	#VALUE!			4	4	4	7.6	7.6	7.6	91.282	0	17.917	22.5979161503112	3	0	0	4	0	2	0	17.597907059863	NaN	NaN	16.7278671264648	NaN	16.4551029205322	NaN	0	NaN	0	P39677	P39677	Ribosome-releasing factor 2, mitochondrial	MEF2	sp|P39677|RRF2M_YEAST Ribosome-releasing factor 2, mitochondrial OS=Saccharomyces cerevisiae (strain ATCC 204508 / S288c) OX=559292 GN=MEF2 PE=1 SV=1
21.8311309814453	22.5257110595703	NaN	NaN	NaN	21.794713973999	-0.69458	0.617889	#VALUE!	#VALUE!	#VALUE!	#VALUE!			2	2	2	3.6	3.6	3.6	93.907	0	2.807	24.0571370211022	3	1	1	0	0	0	2	18.8092028954634	17.843282699585	16.9160194396973	NaN	NaN	NaN	16.616979598999	0	-0.329081535339355	0	P39678	P39678	Transcription factor MBP1	MBP1	sp|P39678|MBP1_YEAST Transcription factor MBP1 OS=Saccharomyces cerevisiae (strain ATCC 204508 / S288c) OX=559292 GN=MBP1 PE=1 SV=1
NaN	NaN	NaN	NaN	20.5148944854736	NaN	#VALUE!	#VALUE!	#VALUE!	#VALUE!	#VALUE!	#VALUE!			1	1	1	4.4	4.4	4.4	31.313	0.0048593	1.815	22.6782038097757	2	0	0	1	1	1	0	18.8708703834239	NaN	NaN	NaN	18.4158401489258	16.9844856262207	NaN	0	NaN	0	P39707	P39707	tRNA-splicing endonuclease subunit SEN34	SEN34	sp|P39707|SEN34_YEAST tRNA-splicing endonuclease subunit SEN34 OS=Saccharomyces cerevisiae (strain ATCC 204508 / S288c) OX=559292 GN=SEN34 PE=1 SV=1
NaN	NaN	23.2489585876465	NaN	23.4092464447021	NaN	#VALUE!	#VALUE!	#VALUE!	#VALUE!	#VALUE!	#VALUE!			6	6	6	10	10	10	98.655	0	4.8736	25.3106696350244	9	1	1	4	1	4	1	19.9531904271757	17.6019020080566	15.8744287490845	18.2206230163574	15.9364995956421	18.4880905151367	14.3019247055054	0	NaN	0	P39717	P39717	Guanine nucleotide-binding protein subunit beta 2	GPB2	sp|P39717|GPB2_YEAST Guanine nucleotide-binding protein subunit beta 2 OS=Saccharomyces cerevisiae (strain ATCC 204508 / S288c) OX=559292 GN=GPB2 PE=1 SV=4
23.1694068908691	NaN	25.5569267272949	21.0227603912354	25.6900310516357	NaN	#VALUE!	#VALUE!	4.53417	23.1697	#VALUE!	#VALUE!			6	6	6	43.9	43.9	43.9	19.877	0	17.521	27.3379861891478	12	0	3	5	2	4	0	24.1680611877055	21.6752128601074	NaN	22.99684715271	14.4286870956421	22.7611331939697	NaN	0	3.78269449869792	0	P39718	P39718	Peroxisome assembly protein 22	PEX22	sp|P39718|PEX22_YEAST Peroxisome assembly protein 22 OS=Saccharomyces cerevisiae (strain ATCC 204508 / S288c) OX=559292 GN=PEX22 PE=1 SV=1
NaN	NaN	21.2903022766113	21.9137134552002	21.6296977996826	NaN	#VALUE!	#VALUE!	-0.623411	0.649134	#VALUE!	#VALUE!			1	1	1	7.7	7.7	7.7	29.769	0	3.3865	23.257530565496	2	0	0	1	1	1	0	19.4501842754132	NaN	NaN	17.8522129058838	17.3062572479248	18.2768516540527	NaN	0	-0.453713417053223	0	P39735	P39735	Single-strand annealing weakened protein 1	SAW1	sp|P39735|SAW1_YEAST Single-strand annealing weakened protein 1 OS=Saccharomyces cerevisiae (strain ATCC 204508 / S288c) OX=559292 GN=SAW1 PE=1 SV=1
20.2784404754639	NaN	NaN	NaN	NaN	NaN	#VALUE!	#VALUE!	#VALUE!	#VALUE!	#VALUE!	#VALUE!			3	3	3	4.3	4.3	4.3	92.259	0.0038541	1.9318	21.9003229006405	3	0	3	0	0	0	0	16.7710767402628	16.7710762023926	NaN	NaN	NaN	NaN	NaN	0	NaN	0	P39944	P39944	Ubiquitin carboxyl-terminal hydrolase 5	UBP5	sp|P39944|UBP5_YEAST Ubiquitin carboxyl-terminal hydrolase 5 OS=Saccharomyces cerevisiae (strain ATCC 204508 / S288c) OX=559292 GN=UBP5 PE=1 SV=1
22.5607852935791	21.6414318084717	NaN	NaN	NaN	NaN	0.919353	1.89127	#VALUE!	#VALUE!	#VALUE!	#VALUE!			4	4	4	11.1	11.1	11.1	56.9	0	3.5758	25.3821530032217	4	2	2	1	1	0	0	20.4752624076132	19.2597618103027	16.7643527984619	NaN	19.4549694061279	NaN	NaN	0	0.919353485107422	0	P39946	P39946	Nuclear distribution protein PAC1	PAC1	sp|P39946|LIS1_YEAST Nuclear distribution protein PAC1 OS=Saccharomyces cerevisiae (strain ATCC 204508 / S288c) OX=559292 GN=PAC1 PE=1 SV=2
NaN	NaN	20.8821868896484	NaN	21.1000175476074	NaN	#VALUE!	#VALUE!	#VALUE!	#VALUE!	#VALUE!	#VALUE!			3	3	3	8.1	8.1	8.1	86.243	0	3.9572	23.8272589597879	4	0	1	1	0	2	0	18.8730355089541	18.2288665771484	NaN	15.8461761474609	NaN	16.7986736297607	NaN	0	NaN	0	P39967	P39967	Ubiquitin carboxyl-terminal hydrolase 9	UBP9	sp|P39967|UBP9_YEAST Ubiquitin carboxyl-terminal hydrolase 9 OS=Saccharomyces cerevisiae (strain ATCC 204508 / S288c) OX=559292 GN=UBP9 PE=1 SV=1
18.9567108154297	20.1821670532227	NaN	NaN	NaN	18.1048755645752	-1.22546	0.427662	#VALUE!	#VALUE!	#VALUE!	#VALUE!			2	2	2	11.8	11.8	11.8	31.644	0.0025753	1.978	22.1107611087122	2	1	1	0	1	0	1	18.0232887110488	16.974100112915	15.9158096313477	NaN	16.0405464172363	NaN	13.0447359085083	0	-0.186810493469238	0	P39995	P39995	Chromatin modification-related protein EAF5	EAF5	sp|P39995|EAF5_YEAST Chromatin modification-related protein EAF5 OS=Saccharomyces cerevisiae (strain ATCC 204508 / S288c) OX=559292 GN=EAF5 PE=1 SV=1
22.3498935699463	NaN	22.7025871276855	NaN	22.751522064209	NaN	#VALUE!	#VALUE!	#VALUE!	#VALUE!	#VALUE!	#VALUE!			3	3	3	13.1	13.1	13.1	31.364	0	6.6679	25.0359891043194	11	0	3	3	1	3	0	21.5765784537153	20.4466762542725	NaN	19.7516613006592	NaN	19.6376075744629	NaN	0	NaN	0	P40003	P40003	Biogenesis of lysosome-related organelles complex 1 subunit VAB2	VAB2	sp|P40003|VAB2_YEAST Biogenesis of lysosome-related organelles complex 1 subunit VAB2 OS=Saccharomyces cerevisiae (strain ATCC 204508 / S288c) OX=559292 GN=VAB2 PE=1 SV=1
NaN	NaN	21.8789348602295	NaN	20.8115100860596	NaN	#VALUE!	#VALUE!	#VALUE!	#VALUE!	#VALUE!	#VALUE!			1	1	1	5.3	5.3	5.3	39.266	0.0012947	2.167	22.8955235115141	1	0	0	1	0	1	0	19.4360974398442	NaN	NaN	18.9505443572998	NaN	17.629056930542	NaN	0	NaN	0	P40004	P40004	UDP-N-acetylglucosamine transporter YEA4	YEA4	sp|P40004|YEA4_YEAST UDP-N-acetylglucosamine transporter YEA4 OS=Saccharomyces cerevisiae (strain ATCC 204508 / S288c) OX=559292 GN=YEA4 PE=1 SV=1
NaN	22.4486427307129	20.7397480010986	NaN	NaN	21.6140975952148	#VALUE!	#VALUE!	#VALUE!	#VALUE!	#VALUE!	#VALUE!			3	3	3	17.2	17.2	17.2	25.244	0	4.0085	23.4289254550338	2	2	0	1	0	1	1	19.7285317266152	NaN	18.9820346832275	16.4049587249756	NaN	16.6598281860352	17.2931118011475	0	-1.29162216186523	0	P40014	P40014	Kinetochore protein SPC25	SPC25	sp|P40014|SPC25_YEAST Kinetochore protein SPC25 OS=Saccharomyces cerevisiae (strain ATCC 204508 / S288c) OX=559292 GN=SPC25 PE=1 SV=1
22.6897010803223	NaN	NaN	NaN	NaN	NaN	#VALUE!	#VALUE!	#VALUE!	#VALUE!	#VALUE!	#VALUE!			2	2	2	18.2	18.2	18.2	16.598	0.00026274	2.5703	24.3115360248947	1	0	2	0	0	0	0	21.1416456682274	21.1416454315186	NaN	NaN	NaN	NaN	NaN	0	NaN	0	P40031	P40031	Sporulation-specific protein 73	SPO73	sp|P40031|SPO73_YEAST Sporulation-specific protein 73 OS=Saccharomyces cerevisiae (strain ATCC 204508 / S288c) OX=559292 GN=SPO73 PE=3 SV=1
NaN	NaN	21.6440753936768	21.8106460571289	NaN	NaN	#VALUE!	#VALUE!	-0.166571	0.890958	#VALUE!	#VALUE!			2	2	2	14.8	14.8	14.8	23.197	0	8.8151	23.0581780637682	2	0	1	1	1	0	0	19.3577366937736	17.0795269012451	NaN	18.4746875762939	17.3670902252197	NaN	NaN	0	-0.166570663452148	0	P40052	P40052	Uncharacterized protein YER079W	YER079W	sp|P40052|YEQ9_YEAST Uncharacterized protein YER079W OS=Saccharomyces cerevisiae (strain ATCC 204508 / S288c) OX=559292 GN=YER079W PE=1 SV=1
NaN	NaN	19.8545436859131	NaN	19.5119647979736	NaN	#VALUE!	#VALUE!	#VALUE!	#VALUE!	#VALUE!	#VALUE!			1	1	1	2.5	2.5	2.5	64.793	0	3.7318	21.1178789525227	2	0	0	1	0	1	0	16.5943246039248	NaN	NaN	15.8620319366455	NaN	15.2653589248657	NaN	0	NaN	0	P40085	P40085	Endoplasmic reticulum membrane protein 65	EMP65	sp|P40085|TAPT1_YEAST Endoplasmic reticulum membrane protein 65 OS=Saccharomyces cerevisiae (strain ATCC 204508 / S288c) OX=559292 GN=EMP65 PE=1 SV=1
23.730447769165	24.6472969055176	NaN	25.0512161254883	NaN	25.1487216949463	-0.916849	0.529665	#VALUE!	#VALUE!	#VALUE!	#VALUE!			7	7	7	22.2	22.2	22.2	47.354	0	30.861	26.6790902418646	25	6	4	0	6	0	6	22.2196317696495	20.5754241943359	20.1543731689453	NaN	19.8846778869629	NaN	20.178279876709	0	-1.21863047281901	0	P40087	P40087	DNA damage-inducible protein 1	DDI1	sp|P40087|DDI1_YEAST DNA damage-inducible protein 1 OS=Saccharomyces cerevisiae (strain ATCC 204508 / S288c) OX=559292 GN=DDI1 PE=1 SV=1
22.9766101837158	23.1904640197754	NaN	NaN	NaN	19.7821922302246	-0.213854	0.862231	#VALUE!	#VALUE!	#VALUE!	#VALUE!			2	2	2	10	10	10	36.153	0	3.7775	25.1072528400552	5	2	2	0	0	0	1	21.2998899349352	20.8291969299316	19.4014759063721	NaN	NaN	NaN	14.6796445846558	0	1.49028205871582	0	P40154	P40154	Ino eighty subunit 2	IES2	sp|P40154|IES2_YEAST Ino eighty subunit 2 OS=Saccharomyces cerevisiae (strain ATCC 204508 / S288c) OX=559292 GN=IES2 PE=1 SV=1
NaN	NaN	25.5317497253418	NaN	25.7177982330322	NaN	#VALUE!	#VALUE!	#VALUE!	#VALUE!	#VALUE!	#VALUE!			8	8	8	49.7	49.7	49.7	23.169	0	30.741	27.1098848410256	15	0	1	7	0	8	0	23.3025697608658	18.9912014007568	NaN	22.3278369903564	NaN	22.1206340789795	NaN	0	NaN	0	P40155	P40155	Peroxisomal membrane protein PEX17	PEX17	sp|P40155|PEX17_YEAST Peroxisomal membrane protein PEX17 OS=Saccharomyces cerevisiae (strain ATCC 204508 / S288c) OX=559292 GN=PEX17 PE=1 SV=1
22.1363983154297	NaN	NaN	NaN	NaN	NaN	#VALUE!	#VALUE!	#VALUE!	#VALUE!	#VALUE!	#VALUE!			2	2	2	16.9	16.9	16.9	34.081	0	4.4845	23.7582695801866	2	0	2	0	0	0	0	19.950914658129	19.9509143829346	NaN	NaN	NaN	NaN	NaN	0	NaN	0	P40169	P40169	Uncharacterized plasma membrane protein YNL194C		sp|P40169|YNT4_YEAST Uncharacterized plasma membrane protein YNL194C OS=Saccharomyces cerevisiae (strain ATCC 204508 / S288c) OX=559292 GN=YNL194C PE=1 SV=1
NaN	NaN	20.7294940948486	NaN	19.9896774291992	NaN	#VALUE!	#VALUE!	#VALUE!	#VALUE!	#VALUE!	#VALUE!			1	1	1	1.9	1.9	1.9	61.938	0.0002635	2.6381	21.8475483060634	2	0	0	1	0	1	0	17.2037112312884	NaN	NaN	16.6166915893555	NaN	15.62282371521	NaN	0	NaN	0	P40187	P40187	GSY2-interacting protein PIG2	PIG2	sp|P40187|PIG2_YEAST GSY2-interacting protein PIG2 OS=Saccharomyces cerevisiae (strain ATCC 204508 / S288c) OX=559292 GN=PIG2 PE=1 SV=1
NaN	NaN	21.6353340148926	NaN	21.906831741333	NaN	#VALUE!	#VALUE!	#VALUE!	#VALUE!	#VALUE!	#VALUE!			2	2	2	5.1	5.1	5.1	54.201	0	3.1858	25.4036663705072	2	0	1	1	0	1	0	22.4036923718056	22.0574512481689	NaN	19.166389465332	NaN	19.1837902069092	NaN	0	NaN	0	P40260;P53390	P40260;P53390	Ammonium transporter MEP1;Ammonium transporter MEP3	MEP1;MEP3	sp|P40260|MEP1_YEAST Ammonium transporter MEP1 OS=Saccharomyces cerevisiae (strain ATCC 204508 / S288c) OX=559292 GN=MEP1 PE=1 SV=1;sp|P53390|MEP3_YEAST Ammonium transporter MEP3 OS=Saccharomyces cerevisiae (strain ATCC 204508 / S288c) OX=559292 GN=MEP3 PE
20.938117980957	NaN	21.2112770080566	NaN	21.0095634460449	22.6160736083984	#VALUE!	#VALUE!	#VALUE!	#VALUE!	-1.60651	0.328392			2	2	2	12.9	12.9	12.9	35.887	0	6.914	24.1254979756947	5	0	2	2	0	2	1	20.4250109604706	19.1619682312012	NaN	18.248779296875	NaN	18.0050315856934	17.9124565124512	0	-1.56308746337891	0	P40344	P40344	Autophagy-related protein 3	ATG3	sp|P40344|ATG3_YEAST Autophagy-related protein 3 OS=Saccharomyces cerevisiae (strain ATCC 204508 / S288c) OX=559292 GN=ATG3 PE=1 SV=1
22.2530059814453	22.162202835083	NaN	NaN	NaN	22.0149517059326	0.0908031	1.06496	#VALUE!	#VALUE!	#VALUE!	#VALUE!			6	6	6	18.2	18.2	18.2	51.896	0.00026116	2.3796	24.5581245187045	6	3	2	0	2	0	1	19.9142683289298	19.3612747192383	18.0364952087402	NaN	NaN	NaN	15.4808530807495	0	0.1644287109375	0	P40354	P40354	Protein N-terminal amidase	NTA1	sp|P40354|NTA1_YEAST Protein N-terminal amidase OS=Saccharomyces cerevisiae (strain ATCC 204508 / S288c) OX=559292 GN=NTA1 PE=1 SV=1
24.3144435882568	NaN	NaN	NaN	NaN	NaN	#VALUE!	#VALUE!	#VALUE!	#VALUE!	#VALUE!	#VALUE!			9	9	9	15.2	15.2	15.2	108.43	0	12.941	26.1900121161499	8	0	8	1	0	1	0	20.4351208449888	20.1814384460449	NaN	17.4109649658203	NaN	15.7301254272461	NaN	0	NaN	0	P40355	P40355	Uncharacterized protein YJR061W		sp|P40355|YJ31_YEAST Uncharacterized protein YJR061W OS=Saccharomyces cerevisiae (strain ATCC 204508 / S288c) OX=559292 GN=YJR061W PE=4 SV=2
NaN	NaN	NaN	21.5611343383789	NaN	21.6249332427979	#VALUE!	#VALUE!	#VALUE!	#VALUE!	#VALUE!	#VALUE!			4	4	4	6.6	6.6	6.6	104.26	0	7.3095	21.9201987280092	5	0	0	0	3	0	2	16.4939336097796	NaN	NaN	NaN	15.452112197876	NaN	15.5345764160156	0	NaN	0	P40361	P40361	Inactive deaminase YJL070C		sp|P40361|YJH0_YEAST Inactive deaminase YJL070C OS=Saccharomyces cerevisiae (strain ATCC 204508 / S288c) OX=559292 GN=YJL070C PE=1 SV=1
21.1393985748291	21.3874816894531	NaN	NaN	NaN	20.9502029418945	-0.248083	0.842014	#VALUE!	#VALUE!	#VALUE!	#VALUE!			2	2	2	4.1	4.1	4.1	93.416	0	3.5386	23.8779251409578	4	1	1	1	0	0	1	18.5559596118785	17.4393272399902	16.0655422210693	16.6902980804443	NaN	NaN	15.0244474411011	0	-0.0294437408447266	0	P40433	P40433	6-phosphofructo-2-kinase 1	PFK26	sp|P40433|6P21_YEAST 6-phosphofructo-2-kinase 1 OS=Saccharomyces cerevisiae (strain ATCC 204508 / S288c) OX=559292 GN=PFK26 PE=1 SV=1
28.2566947937012	23.2671375274658	NaN	NaN	NaN	NaN	4.98956	31.7692	#VALUE!	#VALUE!	#VALUE!	#VALUE!			9	9	9	48	48	48	22.84	0	38.762	29.9052659356295	11	3	9	0	0	0	0	26.3203091741114	26.3115882873535	18.9468669891357	NaN	NaN	NaN	NaN	0	4.98955726623535	0	P40451	P40451	Altered inheritance of mitochondria protein 20	AIM20	sp|P40451|AIM20_YEAST Altered inheritance of mitochondria protein 20 OS=Saccharomyces cerevisiae (strain ATCC 204508 / S288c) OX=559292 GN=AIM20 PE=1 SV=1
23.3635921478271	23.6499843597412	22.5551319122314	NaN	NaN	NaN	-0.286392	0.81995	#VALUE!	#VALUE!	#VALUE!	#VALUE!			4	4	4	13.5	13.5	13.5	42.514	0	6.2557	25.5128294192348	6	3	3	1	0	0	0	21.5128233925495	20.6230125427246	20.3249855041504	15.962760925293	NaN	NaN	NaN	0	-0.690622329711914	0	P40481	P40481	Histidine protein methyltransferase 1	HPM1	sp|P40481|HPM1_YEAST Histidine protein methyltransferase 1 OS=Saccharomyces cerevisiae (strain ATCC 204508 / S288c) OX=559292 GN=HPM1 PE=1 SV=1
22.5585689544678	23.8730506896973	NaN	22.9789142608643	NaN	23.3768978118896	-1.31448	0.40207	#VALUE!	#VALUE!	#VALUE!	#VALUE!			7	7	7	13.4	13.4	13.4	59.15	0	8.1853	25.3612180063404	10	4	4	1	2	0	3	20.3612113118396	18.8143768310547	18.867374420166	NaN	17.2703857421875	NaN	17.929084777832	0	-0.851051966349285	0	P40486	P40486	Protein SHQ1	SHQ1	sp|P40486|SHQ1_YEAST Protein SHQ1 OS=Saccharomyces cerevisiae (strain ATCC 204508 / S288c) OX=559292 GN=SHQ1 PE=1 SV=1
20.6427116394043	NaN	NaN	NaN	20.6005039215088	21.5329322814941	#VALUE!	#VALUE!	#VALUE!	#VALUE!	-0.932428	0.523976			3	3	3	7	7	7	59.894	0.0078981	1.6301	23.3424523465198	4	0	2	0	1	1	2	18.4355888791827	17.8923759460449	NaN	NaN	NaN	15.7916975021362	15.7342071533203	0	-0.911324501037598	0	P40492	P40492	Protein FYV10	FYV10	sp|P40492|FYV10_YEAST Protein FYV10 OS=Saccharomyces cerevisiae (strain ATCC 204508 / S288c) OX=559292 GN=FYV10 PE=1 SV=1
NaN	NaN	NaN	NaN	NaN	21.2627010345459	#VALUE!	#VALUE!	#VALUE!	#VALUE!	#VALUE!	#VALUE!			1	1	1	4.5	4.5	4.5	39.401	0.0012974	2.207	20.6588355800591	1	0	0	0	0	0	1	16.7519885565815	NaN	NaN	NaN	NaN	NaN	16.751989364624	0	NaN	0	P40493	P40493	25S rRNA (uridine(2634)-N(3))-methyltransferase	BMT5	sp|P40493|BMT5_YEAST 25S rRNA (uridine(2634)-N(3))-methyltransferase OS=Saccharomyces cerevisiae (strain ATCC 204508 / S288c) OX=559292 GN=BMT5 PE=1 SV=1
21.776195526123	21.9823837280273	22.8780002593994	NaN	24.2719879150391	NaN	-0.206188	0.866824	#VALUE!	#VALUE!	#VALUE!	#VALUE!			4	4	4	9.6	9.6	9.6	56.332	0	9.8682	25.5447465771758	9	1	1	3	0	4	0	21.2228184822884	18.2673721313477	16.8517246246338	19.4820365905762	NaN	20.289176940918	NaN	0	0.993010838826496	0	P40499	P40499	Protein ICE2	ICE2	sp|P40499|ICE2_YEAST Protein ICE2 OS=Saccharomyces cerevisiae (strain ATCC 204508 / S288c) OX=559292 GN=ICE2 PE=1 SV=1
20.7363662719727	20.8615112304688	NaN	21.2459754943848	NaN	21.7153186798096	-0.125145	0.916912	#VALUE!	#VALUE!	#VALUE!	#VALUE!			2	2	2	8.2	8.2	8.2	31.921	0	4.2282	23.6952988188404	4	2	2	0	1	0	1	19.7884347763086	19.0693340301514	17.4257888793945	NaN	16.1754131317139	NaN	16.6851043701172	0	-0.537902196248371	0	P40558	P40558	Cytosolic Fe-S cluster assembly factor CFD1	CFD1	sp|P40558|CFD1_YEAST Cytosolic Fe-S cluster assembly factor CFD1 OS=Saccharomyces cerevisiae (strain ATCC 204508 / S288c) OX=559292 GN=CFD1 PE=1 SV=1
24.3743133544922	24.6158828735352	23.0250949859619	NaN	23.4994792938232	NaN	-0.24157	0.845825	#VALUE!	#VALUE!	#VALUE!	#VALUE!			5	5	5	6.7	6.7	6.7	108.43	0	10.7	27.1287852624342	8	4	3	2	0	2	0	21.5437795047908	21.1582012176514	18.8632068634033	17.3220157623291	NaN	16.2196788787842	NaN	0	-0.982920328776043	0	P40559	P40559	Phosphatidylinositol 4,5-bisphosphate 5-phosphatase INP51	INP51	sp|P40559|INP51_YEAST Phosphatidylinositol 4,5-bisphosphate 5-phosphatase INP51 OS=Saccharomyces cerevisiae (strain ATCC 204508 / S288c) OX=559292 GN=INP51 PE=1 SV=1
23.0984134674072	NaN	25.6805667877197	21.6306324005127	26.6191883087158	NaN	#VALUE!	#VALUE!	4.04993	16.5635	#VALUE!	#VALUE!			6	6	6	28.5	28.5	28.5	27.6	0	30.244	28.0615212535203	17	0	4	5	1	6	0	24.2541457309509	22.1940021514893	NaN	22.6596641540527	16.3074493408203	23.0197448730469	NaN	0	3.50209045410156	0	P40570	P40570	Putative uncharacterized protein YIR014W	YIR014W	sp|P40570|VLD1_YEAST Vacuole localized DSC protein 1 OS=Saccharomyces cerevisiae (strain ATCC 204508 / S288c) OX=559292 GN=VLD1 PE=1 SV=2
21.2476558685303	NaN	23.5274295806885	NaN	23.2007961273193	NaN	#VALUE!	#VALUE!	#VALUE!	#VALUE!	#VALUE!	#VALUE!			4	4	4	6.4	6.4	6.4	138.33	0	23.692	25.025001980161	11	0	1	4	1	4	0	19.0250205731058	15.6137027740479	NaN	18.071798324585	NaN	17.6648368835449	NaN	0	NaN	0	P40851	P40851	Putative protease AXL1	AXL1	sp|P40851|AXL1_YEAST Putative protease AXL1 OS=Saccharomyces cerevisiae (strain ATCC 204508 / S288c) OX=559292 GN=AXL1 PE=1 SV=2
21.0373802185059	NaN	23.4212398529053	NaN	23.3169994354248	21.7424640655518	#VALUE!	#VALUE!	#VALUE!	#VALUE!	1.57454	2.9784			1	1	1	5.1	5.1	5.1	24.51	0.0010425	2.3218	25.1728748874591	4	0	1	1	0	1	1	22.3655161513663	19.8518772125244	NaN	21.144947052002	NaN	20.7866020202637	18.3312759399414	0	0.849409103393555	0	P40857	P40857	Very-long-chain (3R)-3-hydroxyacyl-CoA dehydratase PHS1	PHS1	sp|P40857|HACD_YEAST Very-long-chain (3R)-3-hydroxyacyl-CoA dehydratase PHS1 OS=Saccharomyces cerevisiae (strain ATCC 204508 / S288c) OX=559292 GN=PHS1 PE=1 SV=1
NaN	NaN	22.1854972839355	NaN	22.3997077941895	NaN	#VALUE!	#VALUE!	#VALUE!	#VALUE!	#VALUE!	#VALUE!			41	1	1	34.1	1.5	1.5	174.4	0	19.995	23.6967850390287	1	0	0	1	0	1	0	17.3748357232007	NaN	NaN	16.3946132659912	NaN	16.3547306060791	NaN	0	NaN	0	P40890	P40890	VPS10 homolog 2	VTH2	sp|P40890|VTH2_YEAST VPS10 homolog 2 OS=Saccharomyces cerevisiae (strain ATCC 204508 / S288c) OX=559292 GN=VTH2 PE=1 SV=1
23.7866611480713	NaN	NaN	NaN	20.7995433807373	NaN	#VALUE!	#VALUE!	#VALUE!	#VALUE!	#VALUE!	#VALUE!			1	1	1	0.8	0.8	0.8	188.95	0	5.9404	25.4783704468803	1	0	1	0	0	1	0	20.2304614503783	20.1605415344238	NaN	NaN	NaN	15.8286075592041	NaN	0	NaN	0	P41809	P41809	Signaling mucin HKR1	HKR1	sp|P41809|HKR1_YEAST Signaling mucin HKR1 OS=Saccharomyces cerevisiae (strain ATCC 204508 / S288c) OX=559292 GN=HKR1 PE=1 SV=2
22.8611125946045	23.1056079864502	NaN	NaN	NaN	22.0749626159668	-0.244495	0.844111	#VALUE!	#VALUE!	#VALUE!	#VALUE!			4	4	4	6.2	6.2	6.2	100.39	0	5.1419	25.0496375340213	8	3	1	0	1	1	2	19.6233707022423	18.9484634399414	17.9667415618896	NaN	NaN	NaN	15.4761762619019	0	0.270827293395996	0	P41812	P41812	Ribonucleases P/MRP protein subunit POP1	POP1	sp|P41812|POP1_YEAST Ribonucleases P/MRP protein subunit POP1 OS=Saccharomyces cerevisiae (strain ATCC 204508 / S288c) OX=559292 GN=POP1 PE=1 SV=1
22.7544212341309	23.058723449707	NaN	NaN	NaN	NaN	-0.304302	0.809834	#VALUE!	#VALUE!	#VALUE!	#VALUE!			6	6	6	13.8	13.8	13.8	94.373	0	11.881	24.8743176401531	9	3	2	0	0	1	3	19.5889158903836	18.7512702941895	17.9996471405029	NaN	NaN	15.5385522842407	15.2004384994507	0	-0.304302215576172	0	P41813	P41813	Fork head protein homolog 2	FKH2	sp|P41813|FKH2_YEAST Fork head protein homolog 2 OS=Saccharomyces cerevisiae (strain ATCC 204508 / S288c) OX=559292 GN=FKH2 PE=1 SV=1
28.1177825927734	24.8451290130615	24.9669723510742	NaN	25.0444355010986	NaN	3.27265	9.66422	#VALUE!	#VALUE!	#VALUE!	#VALUE!			18	18	16	30.5	30.5	27	67.364	0	118.51	29.9980614425829	41	6	18	6	0	7	0	25.5386621136906	25.4192485809326	19.6068248748779	20.7858028411865	NaN	20.2715034484863	NaN	0	1.19793446858724	0	P41815	P41815	Valine amino-acid permease	BAP3	sp|P41815|BAP3_YEAST Valine amino-acid permease OS=Saccharomyces cerevisiae (strain ATCC 204508 / S288c) OX=559292 GN=BAP3 PE=1 SV=2
NaN	22.0629272460938	NaN	22.0815753936768	NaN	NaN	#VALUE!	#VALUE!	#VALUE!	#VALUE!	#VALUE!	#VALUE!			3	3	3	8.4	8.4	8.4	44.732	0.0025727	1.9584	22.8823355699173	3	3	0	0	1	0	0	18.9754449743088	NaN	18.6374664306641	NaN	16.7159881591797	NaN	NaN	0	NaN	0	P41910	P41910	Repressor of RNA polymerase III transcription MAF1	MAF1	sp|P41910|MAF1_YEAST Repressor of RNA polymerase III transcription MAF1 OS=Saccharomyces cerevisiae (strain ATCC 204508 / S288c) OX=559292 GN=MAF1 PE=1 SV=1
22.2454814910889	NaN	NaN	NaN	NaN	NaN	#VALUE!	#VALUE!	#VALUE!	#VALUE!	#VALUE!	#VALUE!			2	2	2	15.6	15.6	15.6	26.541	0	4.2713	23.8673111707802	4	0	2	0	0	0	0	20.2824052341351	20.2824058532715	NaN	NaN	NaN	NaN	NaN	0	NaN	0	P41912	P41912	Ras modification protein ERF4	SHR5	sp|P41912|ERFD_YEAST Ras modification protein ERF4 OS=Saccharomyces cerevisiae (strain ATCC 204508 / S288c) OX=559292 GN=SHR5 PE=1 SV=1
21.1925582885742	NaN	22.080924987793	21.1798610687256	22.2046375274658	NaN	#VALUE!	#VALUE!	0.901064	1.86744	#VALUE!	#VALUE!			3	3	3	6.6	6.6	6.6	52.545	0	3.4678	24.2744788247811	4	0	1	3	1	2	0	20.6895305426371	18.417366027832	NaN	19.6019744873047	16.0028591156006	18.8713512420654	NaN	0	0.64617919921875	0	P41930	P41930	Sulfite efflux pump SSU1	SSU1	sp|P41930|SSU1_YEAST Sulfite efflux pump SSU1 OS=Saccharomyces cerevisiae (strain ATCC 204508 / S288c) OX=559292 GN=SSU1 PE=1 SV=5
25.2070217132568	NaN	23.2006015777588	NaN	23.5033664703369	NaN	#VALUE!	#VALUE!	#VALUE!	#VALUE!	#VALUE!	#VALUE!			4	4	4	8	8	8	108.52	0	32.057	27.238268276597	7	0	4	2	0	2	0	22.7146899179008	22.5204696655273	NaN	18.5236301422119	NaN	18.9027156829834	NaN	0	NaN	0	P42835	P42835	Protein EGT2	EGT2	sp|P42835|EGT2_YEAST Protein EGT2 OS=Saccharomyces cerevisiae (strain ATCC 204508 / S288c) OX=559292 GN=EGT2 PE=2 SV=2
27.4957180023193	21.6915340423584	27.19140625	NaN	27.0426006317139	NaN	5.80418	55.8771	#VALUE!	#VALUE!	#VALUE!	#VALUE!			23	23	23	33.4	33.4	33.4	101.74	0	121.36	30.0865132250226	55	2	20	15	1	16	1	24.6270613596678	23.806266784668	16.0417881011963	22.1565341949463	20.5225772857666	21.7613372802734	20.4555320739746	0	5.55170758565267	0	P42837	P42837	Polyphosphoinositide phosphatase	FIG4	sp|P42837|FIG4_YEAST Polyphosphoinositide phosphatase OS=Saccharomyces cerevisiae (strain ATCC 204508 / S288c) OX=559292 GN=FIG4 PE=1 SV=1
NaN	NaN	NaN	NaN	NaN	21.2564945220947	#VALUE!	#VALUE!	#VALUE!	#VALUE!	#VALUE!	#VALUE!			1	1	1	4.3	4.3	4.3	36.977	0.0048581	1.8074	21.3211904447323	0	0	0	0	1	0	1	17.5138355226747	NaN	NaN	NaN	16.0826683044434	NaN	16.8453674316406	0	NaN	0	Q07747;P42884	Q07747;P42884	Probable aryl-alcohol dehydrogenase AAD4;Putative aryl-alcohol dehydrogenase AAD14	AAD4;AAD14	sp|Q07747|AAD4_YEAST Probable aryl-alcohol dehydrogenase AAD4 OS=Saccharomyces cerevisiae (strain ATCC 204508 / S288c) OX=559292 GN=AAD4 PE=2 SV=1;sp|P42884|AAD14_YEAST Putative aryl-alcohol dehydrogenase AAD14 OS=Saccharomyces cerevisiae (strain ATCC 2045
NaN	NaN	NaN	20.8121356964111	20.5434970855713	NaN	#VALUE!	#VALUE!	#VALUE!	#VALUE!	#VALUE!	#VALUE!			1	1	1	5	5	5	46.12	0	3.4079	21.4931146679223	1	0	0	0	1	1	0	16.9696113627736	NaN	NaN	NaN	15.5454769134521	16.2968978881836	NaN	0	-0.268638610839844	0	P43124	P43124	Non-structural maintenance of chromosome element 4	NSE4	sp|P43124|NSE4_YEAST Non-structural maintenance of chromosome element 4 OS=Saccharomyces cerevisiae (strain ATCC 204508 / S288c) OX=559292 GN=NSE4 PE=1 SV=1
NaN	23.3086929321289	20.5448169708252	22.5747776031494	NaN	NaN	#VALUE!	#VALUE!	-2.02996	0.244862	#VALUE!	#VALUE!			4	4	4	10.9	10.9	10.9	58.347	0.00026233	2.5383	23.9420798914577	7	4	1	1	2	0	0	19.0351534898569	NaN	18.5836181640625	14.8473024368286	16.8098945617676	NaN	NaN	0	-2.39691829681396	0	P43132	P43132	COMPASS component BRE2	BRE2	sp|P43132|BRE2_YEAST COMPASS component BRE2 OS=Saccharomyces cerevisiae (strain ATCC 204508 / S288c) OX=559292 GN=BRE2 PE=1 SV=2
22.9566326141357	22.1876125335693	23.3181037902832	NaN	23.9961929321289	NaN	0.76902	1.70411	#VALUE!	#VALUE!	#VALUE!	#VALUE!			5	5	5	11.5	11.5	11.5	57.618	0	10.662	25.7893505583074	7	1	2	5	0	5	0	20.9819657829604	18.4324512481689	15.3206596374512	19.6155261993408	NaN	19.7358856201172	NaN	0	1.23603057861328	0	P43570	P43570	GTPase-activating protein GYP8	GYP8	sp|P43570|GYP8_YEAST GTPase-activating protein GYP8 OS=Saccharomyces cerevisiae (strain ATCC 204508 / S288c) OX=559292 GN=GYP8 PE=1 SV=1
24.0631580352783	25.3897857666016	NaN	23.2389240264893	NaN	24.7455043792725	-1.32663	0.398699	#VALUE!	#VALUE!	#VALUE!	#VALUE!			9	9	9	15.1	15.1	15.1	91.421	0	22.627	26.612033587704	16	6	5	0	3	0	6	21.3266313688418	19.9025554656982	19.2471351623535	NaN	18.2869453430176	NaN	19.4330425262451	0	-0.394913355509441	0	P43573	P43573	Bud site selection protein 27	BUD27	sp|P43573|BUD27_YEAST Bud site selection protein 27 OS=Saccharomyces cerevisiae (strain ATCC 204508 / S288c) OX=559292 GN=BUD27 PE=1 SV=1
NaN	NaN	23.0942783355713	NaN	23.3850860595703	NaN	#VALUE!	#VALUE!	#VALUE!	#VALUE!	#VALUE!	#VALUE!			2	2	2	12.7	12.7	12.7	25.915	0	8.6608	24.6409143528865	5	0	0	2	0	2	0	21.471000380759	NaN	NaN	20.4185409545898	NaN	20.5216197967529	NaN	0	NaN	0	P43592	P43592	Factor arrest protein 7	FAR7	sp|P43592|FAR7_YEAST Factor arrest protein 7 OS=Saccharomyces cerevisiae (strain ATCC 204508 / S288c) OX=559292 GN=FAR7 PE=1 SV=1
NaN	NaN	NaN	21.7479228973389	NaN	21.6487789154053	#VALUE!	#VALUE!	#VALUE!	#VALUE!	#VALUE!	#VALUE!			2	2	2	11.4	11.4	11.4	27.878	0.0081301	1.5762	22.0249935287433	2	0	0	1	1	0	1	18.4400175056507	NaN	NaN	NaN	17.4197959899902	NaN	17.4599590301514	0	NaN	0	P43615	P43615	Increased recombination centers protein 6	IRC6	sp|P43615|IRC6_YEAST Increased recombination centers protein 6 OS=Saccharomyces cerevisiae (strain ATCC 204508 / S288c) OX=559292 GN=IRC6 PE=1 SV=1
24.0223369598389	NaN	NaN	NaN	NaN	NaN	#VALUE!	#VALUE!	#VALUE!	#VALUE!	#VALUE!	#VALUE!			6	6	6	11	11	11	61.293	0	9.6856	25.644191860856	9	0	6	1	0	0	0	21.1206023937142	21.1206016540527	NaN	NaN	NaN	NaN	NaN	0	NaN	0	P46950	P46950	Nitrosoguanidine resistance protein SNG1	SNG1	sp|P46950|SNG1_YEAST Nitrosoguanidine resistance protein SNG1 OS=Saccharomyces cerevisiae (strain ATCC 204508 / S288c) OX=559292 GN=SNG1 PE=1 SV=1
NaN	NaN	22.4353504180908	NaN	22.1718826293945	NaN	#VALUE!	#VALUE!	#VALUE!	#VALUE!	#VALUE!	#VALUE!			2	2	2	9.6	9.6	9.6	32.577	0	6.7737	23.6780963264424	3	0	0	1	0	2	0	20.8707199067571	NaN	NaN	19.4764499664307	NaN	20.1799812316895	NaN	0	NaN	0	P46961	P46961	Phosphatidylinositol N-acetylglucosaminyltransferase GPI2 subunit	GPI2	sp|P46961|GPI2_YEAST Phosphatidylinositol N-acetylglucosaminyltransferase GPI2 subunit OS=Saccharomyces cerevisiae (strain ATCC 204508 / S288c) OX=559292 GN=GPI2 PE=1 SV=2
NaN	NaN	21.5470314025879	NaN	21.3101921081543	NaN	#VALUE!	#VALUE!	#VALUE!	#VALUE!	#VALUE!	#VALUE!			2	2	2	2.2	2.2	2.2	155.06	0.0091093	1.5043	23.2312088734543	1	0	0	1	0	1	1	17.3004598145967	NaN	NaN	16.1473445892334	NaN	15.6564531326294	15.1826267242432	0	NaN	0	P46974	P46974	Respiration factor 2	RSF2	sp|P46974|RSF2_YEAST Respiration factor 2 OS=Saccharomyces cerevisiae (strain ATCC 204508 / S288c) OX=559292 GN=RSF2 PE=1 SV=1
22.6726474761963	NaN	23.9967956542969	NaN	24.7786636352539	NaN	#VALUE!	#VALUE!	#VALUE!	#VALUE!	#VALUE!	#VALUE!			6	6	6	44.5	44.5	44.5	24.945	0	21.356	26.0992877679252	15	0	1	5	0	5	0	23.0992797406666	19.1920757293701	NaN	22.0801773071289	NaN	21.9146251678467	NaN	0	NaN	0	P46993	P46993	Protein ASG7	ASG7	sp|P46993|ASG7_YEAST Protein ASG7 OS=Saccharomyces cerevisiae (strain ATCC 204508 / S288c) OX=559292 GN=ASG7 PE=1 SV=2
22.491720199585	NaN	22.5827236175537	NaN	23.3383769989014	NaN	#VALUE!	#VALUE!	#VALUE!	#VALUE!	#VALUE!	#VALUE!			3	3	3	5	5	5	61.524	0	4.5021	25.017078207466	6	0	1	3	0	3	0	20.6951501125786	18.4949798583984	NaN	19.1409587860107	NaN	19.5168972015381	NaN	0	NaN	0	P46996	P46996	Uncharacterized membrane protein YJL163C		sp|P46996|YJQ3_YEAST Uncharacterized membrane protein YJL163C OS=Saccharomyces cerevisiae (strain ATCC 204508 / S288c) OX=559292 GN=YJL163C PE=1 SV=1
20.6486034393311	24.0765113830566	NaN	NaN	NaN	18.3605461120605	-3.42791	0.0929174	#VALUE!	#VALUE!	#VALUE!	#VALUE!			1	1	1	2.6	2.6	2.6	44.545	0.0091185	1.525	24.8113723414515	4	1	1	0	0	0	1	20.6414767404644	19.6210289001465	19.6563587188721	NaN	NaN	NaN	11.540563583374	0	-0.569925308227539	0	P47011	P47011	Glycogenin-2	GLG2	sp|P47011|GLG2_YEAST Glycogenin-2 OS=Saccharomyces cerevisiae (strain ATCC 204508 / S288c) OX=559292 GN=GLG2 PE=1 SV=1
26.3275737762451	NaN	25.1028156280518	NaN	25.47314453125	23.786262512207	#VALUE!	#VALUE!	#VALUE!	#VALUE!	1.68688	3.2196			11	11	11	18.1	18.1	18.1	84.465	0	36.753	28.4426095815563	26	0	10	7	0	9	1	23.355146740306	22.7044258117676	NaN	20.4744701385498	NaN	21.1383991241455	16.9923629760742	0	1.84824879964193	0	P47014	P47014	Uncharacterized protein YJL132W		sp|P47014|YJN2_YEAST Uncharacterized protein YJL132W OS=Saccharomyces cerevisiae (strain ATCC 204508 / S288c) OX=559292 GN=YJL132W PE=4 SV=1
22.7343826293945	20.4253177642822	NaN	NaN	NaN	NaN	2.30906	4.95562	#VALUE!	#VALUE!	#VALUE!	#VALUE!			4	4	4	12.1	12.1	12.1	45.016	0	2.9028	24.5254003704748	4	1	4	0	0	0	0	20.1330769732964	20.0844650268555	15.2172765731812	NaN	NaN	NaN	NaN	0	2.3090648651123	0	P47049	P47049	UBX domain-containing protein 6	UBX6	sp|P47049|UBX6_YEAST UBX domain-containing protein 6 OS=Saccharomyces cerevisiae (strain ATCC 204508 / S288c) OX=559292 GN=UBX6 PE=1 SV=1
24.4676837921143	NaN	NaN	NaN	NaN	NaN	#VALUE!	#VALUE!	#VALUE!	#VALUE!	#VALUE!	#VALUE!			5	5	5	21.9	21.9	21.9	24.842	0	7.2314	26.0895015594536	7	0	5	0	0	0	0	22.7675734645663	22.7675743103027	NaN	NaN	NaN	NaN	NaN	0	NaN	0	P47055	P47055	Outer spore wall protein 4	LOH1	sp|P47055|LOH1_YEAST Outer spore wall protein 4 OS=Saccharomyces cerevisiae (strain ATCC 204508 / S288c) OX=559292 GN=LOH1 PE=1 SV=1
NaN	NaN	24.0703010559082	NaN	24.3425884246826	22.2940940856934	#VALUE!	#VALUE!	#VALUE!	#VALUE!	2.04849	4.13674			2	2	2	7.7	7.7	7.7	47.166	0	8.9525	25.7662292272259	6	1	1	2	0	2	1	21.4443011323385	NaN	NaN	20.3304653167725	NaN	20.5193176269531	14.9673166275024	0	1.91235065460205	0	P47088	P47088	GPI mannosyltransferase 1	GPI14	sp|P47088|GPI14_YEAST GPI mannosyltransferase 1 OS=Saccharomyces cerevisiae (strain ATCC 204508 / S288c) OX=559292 GN=GPI14 PE=1 SV=2
23.3443508148193	24.7743453979492	NaN	NaN	NaN	NaN	-1.42999	0.371132	#VALUE!	#VALUE!	#VALUE!	#VALUE!			1	1	1	5.1	5.1	5.1	40.309	0	4.9261	25.9473961595654	5	1	1	0	0	0	0	22.040494415836	21.2560329437256	20.7870807647705	NaN	NaN	NaN	NaN	0	-1.42999458312988	0	P47110	P47110	DNA polymerase delta subunit 3	POL32	sp|P47110|DPOD3_YEAST DNA polymerase delta subunit 3 OS=Saccharomyces cerevisiae (strain ATCC 204508 / S288c) OX=559292 GN=POL32 PE=1 SV=1
25.3108081817627	21.721715927124	NaN	NaN	NaN	NaN	3.58909	12.0344	#VALUE!	#VALUE!	#VALUE!	#VALUE!			8	8	8	18.9	18.9	18.9	57.516	0	13.694	26.9878269344629	10	1	8	0	0	0	0	22.0809254988179	22.0511245727539	16.4681301116943	NaN	NaN	NaN	NaN	0	3.58909225463867	0	P47114	P47114	Uncharacterized vacuolar membrane protein YJR054W		sp|P47114|KCH1_YEAST Low affinity K(+) transporter 1 OS=Saccharomyces cerevisiae (strain ATCC 204508 / S288c) OX=559292 GN=KCH1 PE=1 SV=1
NaN	22.9985179901123	NaN	24.1129894256592	NaN	23.5394306182861	#VALUE!	#VALUE!	#VALUE!	#VALUE!	#VALUE!	#VALUE!			3	3	3	4.3	4.3	4.3	74.234	0.008126	1.5687	24.7172760409237	5	2	0	0	1	0	3	19.3953793279604	NaN	17.4991130828857	NaN	16.680305480957	NaN	18.6071853637695	0	NaN	0	P47139	P47139	Uncharacterized protein YJR098C		sp|P47139|YJ68_YEAST Uncharacterized protein YJR098C OS=Saccharomyces cerevisiae (strain ATCC 204508 / S288c) OX=559292 GN=YJR098C PE=1 SV=2
20.7529525756836	21.1940021514893	NaN	NaN	NaN	NaN	-0.44105	0.736599	#VALUE!	#VALUE!	#VALUE!	#VALUE!			1	1	1	5	5	5	23.557	0.0018079	2.0928	22.9019805147136	2	1	1	0	0	0	0	19.4425507368109	18.915376663208	17.7345638275146	NaN	NaN	NaN	NaN	0	-0.441049575805664	0	P47142	P47142	Vacuolar protein-sorting-associated protein 25	VPS25	sp|P47142|VPS25_YEAST Vacuolar protein-sorting-associated protein 25 OS=Saccharomyces cerevisiae (strain ATCC 204508 / S288c) OX=559292 GN=VPS25 PE=1 SV=1
NaN	NaN	23.2347946166992	NaN	23.5967330932617	NaN	#VALUE!	#VALUE!	#VALUE!	#VALUE!	#VALUE!	#VALUE!			4	4	4	6.8	6.8	6.8	80.656	0.0041015	1.8645	24.8385553413962	5	0	0	2	0	3	0	20.5166272465089	NaN	NaN	19.6569690704346	NaN	19.3611259460449	NaN	0	NaN	0	P47144	P47144	Protein ECM27	ECM27	sp|P47144|ECM27_YEAST Protein ECM27 OS=Saccharomyces cerevisiae (strain ATCC 204508 / S288c) OX=559292 GN=ECM27 PE=1 SV=2
NaN	NaN	22.8175144195557	23.5428581237793	23.8204574584961	NaN	#VALUE!	#VALUE!	-0.725344	0.604853	#VALUE!	#VALUE!			3	3	3	3.5	3.5	3.5	80.151	0.0091116	1.5104	24.9919618815513	4	0	1	2	2	1	1	19.9044964461455	16.3602294921875	NaN	18.7675895690918	18.5879821777344	15.7074403762817	11.7572650909424	0	-0.223872184753418	0	P47147	P47147	Phosphoinositide 3-phosphatase	YMR1	sp|P47147|YMR1_YEAST Phosphoinositide 3-phosphatase OS=Saccharomyces cerevisiae (strain ATCC 204508 / S288c) OX=559292 GN=YMR1 PE=1 SV=1
21.3950862884521	20.2434196472168	NaN	19.7463569641113	NaN	21.8737258911133	1.15167	2.2217	#VALUE!	#VALUE!	#VALUE!	#VALUE!			3	3	3	21.4	21.4	21.4	23.639	0	7.1485	23.487630059824	6	1	1	1	2	1	2	19.787127785109	17.8997116088867	15.1587677001953	NaN	16.4113445281982	18.0284233093262	18.0377826690674	0	0.773918787638348	0	P47149	P47149	Kinetochore-associated protein NNF1	NNF1	sp|P47149|NNF1_YEAST Kinetochore-associated protein NNF1 OS=Saccharomyces cerevisiae (strain ATCC 204508 / S288c) OX=559292 GN=NNF1 PE=1 SV=3
NaN	NaN	19.9119300842285	NaN	20.0139980316162	NaN	#VALUE!	#VALUE!	#VALUE!	#VALUE!	#VALUE!	#VALUE!			1	1	1	2.4	2.4	2.4	57.054	0	3.2256	21.3690093936877	2	0	0	1	0	1	0	16.6141059112071	NaN	NaN	15.6881132125854	NaN	15.5361261367798	NaN	0	NaN	0	P47158	P47158	Putative transferase CAF17, mitochondrial	IBA57	sp|P47158|CAF17_YEAST Putative transferase CAF17, mitochondrial OS=Saccharomyces cerevisiae (strain ATCC 204508 / S288c) OX=559292 GN=IBA57 PE=1 SV=1
NaN	23.4911823272705	NaN	NaN	NaN	NaN	#VALUE!	#VALUE!	#VALUE!	#VALUE!	#VALUE!	#VALUE!			3	3	3	5.9	5.9	5.9	72.35	0.0081384	1.5827	23.4911827433317	3	3	0	0	0	0	0	18.6838718686226	NaN	18.6838722229004	NaN	NaN	NaN	NaN	0	NaN	0	P47164	P47164	Cystathionine gamma-synthase	STR2	sp|P47164|MET7_YEAST Cystathionine gamma-synthase OS=Saccharomyces cerevisiae (strain ATCC 204508 / S288c) OX=559292 GN=STR2 PE=1 SV=1
24.8891124725342	NaN	NaN	NaN	NaN	NaN	#VALUE!	#VALUE!	#VALUE!	#VALUE!	#VALUE!	#VALUE!			9	2	0	26.1	5.5	0	45.708	0	4.3559	26.5109599399669	2	0	2	0	0	0	0	22.4234986073376	22.4234981536865	NaN	NaN	NaN	NaN	NaN	0	NaN	0	P47187	P47187	Protein COS5	COS5	sp|P47187|COS5_YEAST Protein COS5 OS=Saccharomyces cerevisiae (strain ATCC 204508 / S288c) OX=559292 GN=COS5 PE=1 SV=1
NaN	NaN	NaN	NaN	24.131477355957	25.3172760009766	#VALUE!	#VALUE!	#VALUE!	#VALUE!	-1.1858	0.439581			4	4	4	50	50	50	16.071	0	9.7787	26.474523031203	8	0	0	3	1	4	3	23.889576002489	NaN	NaN	21.818078994751	21.2567253112793	22.5142688751221	21.6745223999023	0	-1.18579864501953	0	P47822	P47822	Mediator of RNA polymerase II transcription subunit 21	SRB7	sp|P47822|MED21_YEAST Mediator of RNA polymerase II transcription subunit 21 OS=Saccharomyces cerevisiae (strain ATCC 204508 / S288c) OX=559292 GN=SRB7 PE=1 SV=1
NaN	NaN	NaN	19.4716949462891	19.1466884613037	NaN	#VALUE!	#VALUE!	#VALUE!	#VALUE!	#VALUE!	#VALUE!			2	2	2	3.6	3.6	3.6	86.832	0.0010417	2.3142	20.1175619393941	3	0	0	0	1	2	0	14.8321483067602	NaN	NaN	NaN	13.4432029724121	14.1382713317871	NaN	0	-0.325006484985352	0	P47988	P47988	TY1 enhancer activator	TEA1	sp|P47988|TEA1_YEAST TY1 enhancer activator OS=Saccharomyces cerevisiae (strain ATCC 204508 / S288c) OX=559292 GN=TEA1 PE=1 SV=2
NaN	NaN	22.1332969665527	20.6635341644287	22.2390556335449	NaN	#VALUE!	#VALUE!	1.46976	2.76976	#VALUE!	#VALUE!			1	1	1	16.7	16.7	16.7	11.461	0	2.7488	23.7010229653804	3	0	0	1	1	1	0	21.7010864396037	NaN	NaN	20.6643161773682	17.9203872680664	20.5160503387451	NaN	0	1.52264213562012	0	P48232	P48232	Biogenesis of lysosome-related organelles complex 1 subunit SNN1	SNN1	sp|P48232|SNAPN_YEAST Biogenesis of lysosome-related organelles complex 1 subunit SNN1 OS=Saccharomyces cerevisiae (strain ATCC 204508 / S288c) OX=559292 GN=SNN1 PE=1 SV=1
21.6448249816895	22.8113918304443	NaN	NaN	NaN	22.4890270233154	-1.16657	0.44548	#VALUE!	#VALUE!	#VALUE!	#VALUE!			2	2	2	4.3	4.3	4.3	61.603	0	3.1936	24.7326237285176	3	1	1	0	0	0	2	19.6451588172535	18.1024169921875	18.6646976470947	NaN	NaN	NaN	16.9075946807861	0	-1.00538444519043	0	P48525	P48525	Glutamate--tRNA ligase, mitochondrial	MSE1	sp|P48525|SYEM_YEAST Glutamate--tRNA ligase, mitochondrial OS=Saccharomyces cerevisiae (strain ATCC 204508 / S288c) OX=559292 GN=MSE1 PE=1 SV=2
23.0135898590088	NaN	25.4098281860352	NaN	25.7362937927246	NaN	#VALUE!	#VALUE!	#VALUE!	#VALUE!	#VALUE!	#VALUE!			3	3	3	17.5	17.5	17.5	33.645	0	10.576	27.2437254576375	11	0	2	3	0	3	0	24.0737369079464	21.5444869995117	NaN	22.7461795806885	NaN	22.8506031036377	NaN	0	NaN	0	P48558	P48558	Bax inhibitor 1	BXI1	sp|P48558|BXI1_YEAST Bax inhibitor 1 OS=Saccharomyces cerevisiae (strain ATCC 204508 / S288c) OX=559292 GN=BXI1 PE=1 SV=1
23.9271430969238	NaN	NaN	NaN	21.4892482757568	NaN	#VALUE!	#VALUE!	#VALUE!	#VALUE!	#VALUE!	#VALUE!			3	3	3	8.4	8.4	8.4	61.532	0	7.5808	25.6784724830805	4	0	3	0	0	1	0	21.4305342236654	21.3507289886475	NaN	NaN	NaN	17.2145652770996	NaN	0	NaN	0	P48565	P48565	pH-response regulator protein palH/RIM21	RIM21	sp|P48565|PALH_YEAST pH-response regulator protein palH/RIM21 OS=Saccharomyces cerevisiae (strain ATCC 204508 / S288c) OX=559292 GN=RIM21 PE=1 SV=1
NaN	NaN	NaN	20.7924118041992	21.6634464263916	NaN	#VALUE!	#VALUE!	#VALUE!	#VALUE!	#VALUE!	#VALUE!			2	2	2	5.5	5.5	5.5	72.998	0	5.8662	23.5276688532343	3	0	1	0	1	1	0	18.3983679411766	17.6061744689941	NaN	NaN	14.9199810028076	16.811149597168	NaN	0	0.871034622192383	0	P48566	P48566	GTPase-activating protein GYP3	MSB3	sp|P48566|GYP3_YEAST GTPase-activating protein GYP3 OS=Saccharomyces cerevisiae (strain ATCC 204508 / S288c) OX=559292 GN=MSB3 PE=1 SV=1
NaN	NaN	22.5971660614014	NaN	22.6845092773438	NaN	#VALUE!	#VALUE!	#VALUE!	#VALUE!	#VALUE!	#VALUE!			2	2	2	11.2	11.2	11.2	37.047	0	5.0361	24.2441611416677	1	0	0	2	1	2	1	20.5436851215491	NaN	NaN	19.3337440490723	17.3256225585938	19.344274520874	15.2113180160522	0	NaN	0	P48569	P48569	Uncharacterized protein YDL183C		sp|P48569|YD183_YEAST Uncharacterized protein YDL183C OS=Saccharomyces cerevisiae (strain ATCC 204508 / S288c) OX=559292 GN=YDL183C PE=4 SV=1
22.1603870391846	22.5791816711426	NaN	22.1988639831543	NaN	22.4948234558105	-0.418795	0.748049	#VALUE!	#VALUE!	#VALUE!	#VALUE!			3	3	3	31.6	31.6	31.6	23.541	0	5.78	25.0468099423169	6	2	2	0	2	0	1	21.4618391169704	20.939624786377	18.7346973419189	NaN	18.2080535888672	NaN	17.0761890411377	0	-0.26390266418457	0	P49775	P49775	Bis(5-adenosyl)-triphosphatase	HNT2	sp|P49775|HNT2_YEAST Bis(5-adenosyl)-triphosphatase OS=Saccharomyces cerevisiae (strain ATCC 204508 / S288c) OX=559292 GN=HNT2 PE=1 SV=2
22.6286754608154	21.8665370941162	22.459939956665	NaN	22.361665725708	NaN	0.762138	1.696	#VALUE!	#VALUE!	#VALUE!	#VALUE!			6	6	6	4.5	4.5	4.5	234.6	0	10.045	25.3142704020728	8	2	3	5	0	2	0	19.0104789341833	17.8519687652588	14.6834878921509	17.1596546173096	NaN	16.8582973480225	NaN	0	0.616889953613281	0	P50077	P50077	Calcium-channel protein CCH1	CCH1	sp|P50077|CCH1_YEAST Calcium-channel protein CCH1 OS=Saccharomyces cerevisiae (strain ATCC 204508 / S288c) OX=559292 GN=CCH1 PE=1 SV=1
NaN	NaN	NaN	NaN	21.4273662567139	20.9722499847412	#VALUE!	#VALUE!	#VALUE!	#VALUE!	0.455116	1.37089			2	2	2	4.5	4.5	4.5	99.974	0	10.757	22.3254240466632	6	1	0	0	1	1	1	16.7708187245166	NaN	13.3330154418945	NaN	NaN	16.1497268676758	14.8137807846069	0	0.455116271972656	0	P50090	P50090	Kelch repeat-containing protein 2	KEL2	sp|P50090|KEL2_YEAST Kelch repeat-containing protein 2 OS=Saccharomyces cerevisiae (strain ATCC 204508 / S288c) OX=559292 GN=KEL2 PE=1 SV=1
22.400411605835	23.6078357696533	NaN	NaN	NaN	NaN	-1.20742	0.433041	#VALUE!	#VALUE!	#VALUE!	#VALUE!			2	2	2	10.2	10.2	10.2	14.585	0	3.3037	25.012013052759	3	1	2	0	0	0	0	24.0119704129966	23.4540004730225	22.3715648651123	NaN	NaN	NaN	NaN	0	-1.20742416381836	0	P50106	P50106	DNA-directed RNA polymerase I subunit RPA14	RPA14	sp|P50106|RPA14_YEAST DNA-directed RNA polymerase I subunit RPA14 OS=Saccharomyces cerevisiae (strain ATCC 204508 / S288c) OX=559292 GN=RPA14 PE=1 SV=1
NaN	NaN	NaN	NaN	NaN	21.8208084106445	#VALUE!	#VALUE!	#VALUE!	#VALUE!	#VALUE!	#VALUE!			2	2	2	5.5	5.5	5.5	57.805	0.00026192	2.455	22.6312090350138	0	0	1	0	1	0	2	17.8238274635806	16.5891246795654	NaN	NaN	15.500997543335	NaN	16.4096221923828	0	NaN	0	P50264	P50264	Polyamine oxidase FMS1	FMS1	sp|P50264|FMS1_YEAST Polyamine oxidase FMS1 OS=Saccharomyces cerevisiae (strain ATCC 204508 / S288c) OX=559292 GN=FMS1 PE=1 SV=1
NaN	NaN	22.3684501647949	NaN	22.3353271484375	NaN	#VALUE!	#VALUE!	#VALUE!	#VALUE!	#VALUE!	#VALUE!			3	3	3	12.5	12.5	12.5	37.353	0	5.9725	23.804889632239	4	0	0	3	0	2	0	19.9975543988228	NaN	NaN	19.5057182312012	NaN	18.2061462402344	NaN	0	NaN	0	P52919	P52919	NAP1-binding protein	NBP1	sp|P52919|NBP1_YEAST NAP1-binding protein OS=Saccharomyces cerevisiae (strain ATCC 204508 / S288c) OX=559292 GN=NBP1 PE=1 SV=1
20.2474822998047	NaN	NaN	NaN	20.4273662567139	21.8123722076416	#VALUE!	#VALUE!	#VALUE!	#VALUE!	-1.38501	0.382888			1	1	1	12.8	12.8	12.8	28.776	0.0038521	1.9151	22.9556222403985	1	0	1	0	0	1	1	19.6336941455111	18.572338104248	NaN	NaN	NaN	17.5871772766113	17.7907428741455	0	-1.47494792938232	0	P53068	P53068	Anaphase-promoting complex subunit DOC1	DOC1	sp|P53068|APC10_YEAST Anaphase-promoting complex subunit DOC1 OS=Saccharomyces cerevisiae (strain ATCC 204508 / S288c) OX=559292 GN=DOC1 PE=1 SV=2
22.467098236084	22.9926528930664	NaN	NaN	NaN	22.2215805053711	-0.525555	0.694692	#VALUE!	#VALUE!	#VALUE!	#VALUE!			2	2	2	20	20	20	14.102	0	5.637	24.8591332219152	5	2	1	1	0	0	1	22.5372051270278	21.7534427642822	21.1615257263184	NaN	NaN	NaN	17.64990234375	0	-0.140018463134766	0	P53082	P53082	Fe repressor of activation 2	FRA2	sp|P53082|BOL2_YEAST BolA-like protein 2 OS=Saccharomyces cerevisiae (strain ATCC 204508 / S288c) OX=559292 GN=BOL2 PE=1 SV=1
24.4602031707764	NaN	NaN	NaN	NaN	NaN	#VALUE!	#VALUE!	#VALUE!	#VALUE!	#VALUE!	#VALUE!			2	2	2	7.2	7.2	7.2	39.987	0.00026103	2.3652	26.0820876289134	2	0	1	0	0	0	1	21.9121423185491	21.9121417999268	NaN	NaN	NaN	NaN	NaN	0	NaN	0	P53088	P53088	Cytoplasmic tRNA 2-thiolation protein 1	NCS6	sp|P53088|CTU1_YEAST Cytoplasmic tRNA 2-thiolation protein 1 OS=Saccharomyces cerevisiae (strain ATCC 204508 / S288c) OX=559292 GN=NCS6 PE=1 SV=3
NaN	NaN	20.6127033233643	NaN	21.0560283660889	NaN	#VALUE!	#VALUE!	#VALUE!	#VALUE!	#VALUE!	#VALUE!			1	1	1	11.9	11.9	11.9	11.351	0.0002624	2.5383	22.2414432293609	2	0	0	1	0	1	0	19.9195296823899	NaN	NaN	18.8218059539795	NaN	19.0110244750977	NaN	0	NaN	0	P53089	P53089	Uncharacterized protein YGL204C	YGL204C	sp|P53089|YGV4_YEAST Uncharacterized protein YGL204C OS=Saccharomyces cerevisiae (strain ATCC 204508 / S288c) OX=559292 GN=YGL204C PE=4 SV=1
NaN	NaN	21.9484577178955	NaN	NaN	NaN	#VALUE!	#VALUE!	#VALUE!	#VALUE!	#VALUE!	#VALUE!			2	2	2	9.2	9.2	9.2	51.828	0	4.1685	22.8415912198867	2	0	0	1	0	1	0	18.4492776359465	NaN	NaN	18.0871620178223	NaN	16.2776508331299	NaN	0	NaN	0	P53101	P53101	Cystathionine beta-lyase	STR3	sp|P53101|STR3_YEAST Cystathionine beta-lyase OS=Saccharomyces cerevisiae (strain ATCC 204508 / S288c) OX=559292 GN=STR3 PE=1 SV=1
NaN	NaN	18.4508895874023	25.252197265625	18.6321849822998	NaN	#VALUE!	#VALUE!	-6.80131	0.00896608	#VALUE!	#VALUE!			4	4	4	10.5	10.5	10.5	50.296	0	3.3419	26.3476482646618	6	2	0	1	2	1	3	21.8882200248952	NaN	18.1390113830566	15.3058834075928	20.0262107849121	15.414421081543	21.2190399169922	0	-6.71065998077393	0	P53107	P53107	Ran-specific GTPase-activating protein 30	YRB30	sp|P53107|YRB30_YEAST Ran-specific GTPase-activating protein 30 OS=Saccharomyces cerevisiae (strain ATCC 204508 / S288c) OX=559292 GN=YRB30 PE=1 SV=1
NaN	NaN	NaN	24.0277462005615	21.823881149292	23.8457508087158	#VALUE!	#VALUE!	#VALUE!	#VALUE!	-2.02187	0.246239			3	3	3	7.2	7.2	7.2	68.559	0	11.739	24.7017104540953	7	1	0	0	3	1	3	19.8943470726291	NaN	16.9857082366943	NaN	18.5532989501953	16.4282455444336	18.5044784545898	0	-2.11286735534668	0	P53128	P53128	Methylenetetrahydrofolate reductase 2	MET13	sp|P53128|MTHR2_YEAST Methylenetetrahydrofolate reductase 2 OS=Saccharomyces cerevisiae (strain ATCC 204508 / S288c) OX=559292 GN=MET13 PE=1 SV=2
22.0019931793213	22.1478996276855	NaN	NaN	NaN	NaN	-0.145906	0.903811	#VALUE!	#VALUE!	#VALUE!	#VALUE!			2	2	2	6.8	6.8	6.8	30.755	0.0012953	2.1804	24.3781556546311	2	1	2	0	0	0	0	20.4712981403915	20.2872619628906	17.4090595245361	NaN	NaN	NaN	NaN	0	-0.145906448364258	0	P53133	P53133	Uncharacterized protein YGL117W	YGL117W	sp|P53133|YGL7_YEAST Uncharacterized protein YGL117W OS=Saccharomyces cerevisiae (strain ATCC 204508 / S288c) OX=559292 GN=YGL117W PE=1 SV=1
NaN	NaN	20.0611820220947	NaN	NaN	NaN	#VALUE!	#VALUE!	#VALUE!	#VALUE!	#VALUE!	#VALUE!			1	1	1	3.1	3.1	3.1	54.331	0.0091255	1.5256	20.5923146820762	1	0	0	1	0	0	0	16.8917837032183	NaN	NaN	16.8917827606201	NaN	NaN	NaN	0	NaN	0	P53142	P53142	Vacuolar protein sorting-associated protein 73	VPS73	sp|P53142|VPS73_YEAST Vacuolar protein sorting-associated protein 73 OS=Saccharomyces cerevisiae (strain ATCC 204508 / S288c) OX=559292 GN=VPS73 PE=1 SV=1
21.1818027496338	NaN	22.848445892334	NaN	23.0874156951904	NaN	#VALUE!	#VALUE!	#VALUE!	#VALUE!	#VALUE!	#VALUE!			6	6	6	14.7	14.7	14.7	44.585	0	13.764	24.6079488247911	13	0	1	5	0	5	2	19.9640926350164	16.312032699585	NaN	18.5080413818359	NaN	19.1171569824219	NaN	0	NaN	0	P53159	P53159	Monopolar spindle protein 2	MPS2	sp|P53159|MPS2_YEAST Monopolar spindle protein 2 OS=Saccharomyces cerevisiae (strain ATCC 204508 / S288c) OX=559292 GN=MPS2 PE=1 SV=1
23.5595264434814	23.173210144043	22.9294033050537	NaN	20.865140914917	NaN	0.386316	1.30705	#VALUE!	#VALUE!	#VALUE!	#VALUE!			7	7	7	13	13	13	63.057	0	7.4682	25.7265302170349	9	4	5	1	0	1	0	20.6820893245065	19.7467346191406	18.5070362091064	18.5795364379883	NaN	15.2290821075439	NaN	0	-0.721853256225586	0	P53166	P53166	ATP-dependent RNA helicase MRH4, mitochondrial	MRH4	sp|P53166|MRH4_YEAST ATP-dependent RNA helicase MRH4, mitochondrial OS=Saccharomyces cerevisiae (strain ATCC 204508 / S288c) OX=559292 GN=MRH4 PE=1 SV=1
21.6779670715332	22.6053733825684	NaN	22.9961242675781	NaN	22.584903717041	-0.927406	0.525803	#VALUE!	#VALUE!	#VALUE!	#VALUE!			7	7	7	11.2	11.2	11.2	73.101	0	4.6128	25.5033060464401	10	4	2	1	3	1	3	20.4158614048358	18.1644248962402	18.3043422698975	18.2349586486816	16.4446582794189	18.1237373352051	16.5810241699219	0	-1.05083338419596	0	P53169	P53169	YAP1-binding protein 2	YBP2	sp|P53169|YBP2_YEAST YAP1-binding protein 2 OS=Saccharomyces cerevisiae (strain ATCC 204508 / S288c) OX=559292 GN=YBP2 PE=1 SV=1
NaN	NaN	22.6053066253662	NaN	22.4820995330811	NaN	#VALUE!	#VALUE!	#VALUE!	#VALUE!	#VALUE!	#VALUE!			1	1	1	8.4	8.4	8.4	32.959	0.00026226	2.5117	23.9600493183811	1	0	0	1	0	1	0	19.9599962738968	NaN	NaN	19.136360168457	NaN	18.7590618133545	NaN	0	NaN	0	P53171	P53171	Genetic interactor of prohibitin 7, mitochondrial	GEP7	sp|P53171|GEP7_YEAST Genetic interactor of prohibitin 7, mitochondrial OS=Saccharomyces cerevisiae (strain ATCC 204508 / S288c) OX=559292 GN=GEP7 PE=1 SV=1
25.1471309661865	NaN	22.1745071411133	NaN	22.9346122741699	NaN	#VALUE!	#VALUE!	#VALUE!	#VALUE!	#VALUE!	#VALUE!			4	4	4	10.3	10.3	10.3	56.446	0	45.501	26.9967961920998	9	0	4	1	0	2	0	24.1894089512429	24.0298538208008	NaN	19.3400840759277	NaN	20.3527240753174	NaN	0	NaN	0	P53189	P53189	Probable family 17 glucosidase SCW11	SCW11	sp|P53189|SCW11_YEAST Probable family 17 glucosidase SCW11 OS=Saccharomyces cerevisiae (strain ATCC 204508 / S288c) OX=559292 GN=SCW11 PE=1 SV=1
NaN	22.6447372436523	22.1411781311035	NaN	21.3514842987061	NaN	#VALUE!	#VALUE!	#VALUE!	#VALUE!	#VALUE!	#VALUE!			5	5	5	7.5	7.5	7.5	86.114	0	4.571	24.0370790381519	8	4	0	2	0	1	1	18.7516617335185	NaN	17.7254734039307	17.5088157653809	NaN	15.2198495864868	NaN	0	-0.898406028747559	0	P53202	P53202	Cullin-3	CUL3	sp|P53202|CUL3_YEAST Cullin-3 OS=Saccharomyces cerevisiae (strain ATCC 204508 / S288c) OX=559292 GN=CUL3 PE=1 SV=1
21.9000644683838	NaN	21.5863246917725	NaN	NaN	NaN	#VALUE!	#VALUE!	#VALUE!	#VALUE!	#VALUE!	#VALUE!			4	3	3	8.2	8.2	8.2	57.527	0	13.898	24.0936174376731	5	0	3	1	0	0	0	20.634137465135	20.3310127258301	NaN	18.2346305847168	NaN	NaN	NaN	0	NaN	0	P53214	P53214	Protein MTL1	MTL1	sp|P53214|MTL1_YEAST Protein MTL1 OS=Saccharomyces cerevisiae (strain ATCC 204508 / S288c) OX=559292 GN=MTL1 PE=1 SV=1
NaN	NaN	24.6100921630859	NaN	24.0493469238281	NaN	#VALUE!	#VALUE!	#VALUE!	#VALUE!	#VALUE!	#VALUE!			9	9	9	19.5	19.5	19.5	68.164	0	17.453	26.0571990089587	17	2	1	7	0	6	0	21.2498564841528	17.3333301544189	17.96826171875	20.3288230895996	NaN	19.5262317657471	NaN	0	NaN	0	P53248	P53248	Peroxisomal biogenesis factor 8	PEX8	sp|P53248|PEX8_YEAST Peroxisomal biogenesis factor 8 OS=Saccharomyces cerevisiae (strain ATCC 204508 / S288c) OX=559292 GN=PEX8 PE=1 SV=1
23.3011741638184	24.5261173248291	NaN	23.5026378631592	NaN	24.0410957336426	-1.22494	0.427814	#VALUE!	#VALUE!	#VALUE!	#VALUE!			5	5	5	34.8	34.8	34.8	24.069	0	16.692	26.1061347812905	12	4	3	0	3	0	2	22.6466931760819	21.1128616333008	21.5176372528076	NaN	18.9173603057861	NaN	19.6120014190674	0	-0.722109476725262	0	P53251	P53251	Ribosome biogenesis protein SLX9	SLX9	sp|P53251|SLX9_YEAST Ribosome biogenesis protein SLX9 OS=Saccharomyces cerevisiae (strain ATCC 204508 / S288c) OX=559292 GN=SLX9 PE=1 SV=1
NaN	21.7455863952637	NaN	21.9704265594482	NaN	21.7375621795654	#VALUE!	#VALUE!	#VALUE!	#VALUE!	#VALUE!	#VALUE!			1	1	1	3.2	3.2	3.2	58.205	0	3.2786	22.9589703636692	1	1	0	0	1	0	1	18.2040934781054	NaN	16.8638725280762	NaN	16.5704345703125	NaN	16.3816604614258	0	NaN	0	P53255	P53255	CWF19-like protein DRN1	DRN1	sp|P53255|DRN1_YEAST CWF19-like protein DRN1 OS=Saccharomyces cerevisiae (strain ATCC 204508 / S288c) OX=559292 GN=DRN1 PE=1 SV=1
24.5952548980713	23.7214012145996	NaN	NaN	22.2107429504395	NaN	0.873854	1.83255	#VALUE!	#VALUE!	#VALUE!	#VALUE!			3	2	2	9.3	6.5	6.5	67.588	0	32.308	26.5414417028561	6	1	2	0	0	1	0	22.6345363363569	22.3133220672607	19.8861064910889	NaN	NaN	18.335599899292	NaN	0	-0.318402290344238	0	P53283	P53283	Polyamine transporter 2	TPO2	sp|P53283|TPO2_YEAST Polyamine transporter 2 OS=Saccharomyces cerevisiae (strain ATCC 204508 / S288c) OX=559292 GN=TPO2 PE=1 SV=1
23.2692794799805	21.4821739196777	NaN	NaN	20.6358203887939	NaN	1.78711	3.45122	#VALUE!	#VALUE!	#VALUE!	#VALUE!			6	6	6	22.2	22.2	22.2	47.167	0	11.753	25.2930211292171	7	1	5	1	0	1	0	21.2055617972302	21.0226249694824	16.7432041168213	16.6709327697754	NaN	16.1737747192383	NaN	0	0.470376014709473	0	P53286	P53286	Protein BTN2	BTN2	sp|P53286|BTN2_YEAST Protein BTN2 OS=Saccharomyces cerevisiae (strain ATCC 204508 / S288c) OX=559292 GN=BTN2 PE=1 SV=1
NaN	NaN	20.7913799285889	NaN	21.0264129638672	NaN	#VALUE!	#VALUE!	#VALUE!	#VALUE!	#VALUE!	#VALUE!			1	1	1	14.5	14.5	14.5	12.392	0	3.623	22.3129350120874	2	0	0	1	0	1	0	19.7279669734978	NaN	NaN	18.7374725341797	NaN	18.7183990478516	NaN	0	NaN	0	P53305	P53305	Mitochondrial 37S ribosomal protein S27	RSM27	sp|P53305|RT27_YEAST Mitochondrial 37S ribosomal protein S27 OS=Saccharomyces cerevisiae (strain ATCC 204508 / S288c) OX=559292 GN=RSM27 PE=1 SV=1
22.1518058776855	NaN	23.1031913757324	22.6572666168213	23.0267677307129	NaN	#VALUE!	#VALUE!	0.445925	1.36219	#VALUE!	#VALUE!			3	3	3	6.2	6.2	6.2	70.354	0	4.5515	25.3335744044983	5	0	1	3	1	3	0	20.7486187277567	18.844295501709	NaN	19.2876892089844	16.2910442352295	19.1230545043945	NaN	0	0.103321711222332	0	P53306	P53306	Phosphatidylinositol N-acetylglucosaminyltransferase subunit GPI1	GPI1	sp|P53306|GPI1_YEAST Phosphatidylinositol N-acetylglucosaminyltransferase subunit GPI1 OS=Saccharomyces cerevisiae (strain ATCC 204508 / S288c) OX=559292 GN=GPI1 PE=1 SV=1
23.3494892120361	22.4593639373779	NaN	NaN	NaN	NaN	0.890125	1.85334	#VALUE!	#VALUE!	#VALUE!	#VALUE!			1	1	1	12.1	12.1	12.1	26.731	0	3.4292	25.2043383017607	2	1	1	0	0	0	0	21.8824102068733	21.6493492126465	19.1374359130859	NaN	NaN	NaN	NaN	0	0.890125274658203	0	P53314	P53314	2,3-cyclic-nucleotide 3-phosphodiesterase	CPD1	sp|P53314|CPD1_YEAST 2,3-cyclic-nucleotide 3-phosphodiesterase OS=Saccharomyces cerevisiae (strain ATCC 204508 / S288c) OX=559292 GN=CPD1 PE=1 SV=1
22.3038234710693	22.924373626709	NaN	21.7298259735107	NaN	21.3332538604736	-0.62055	0.650423	#VALUE!	#VALUE!	#VALUE!	#VALUE!			1	1	1	6.6	6.6	6.6	22.32	0	3.8244	24.7239554381492	3	1	1	0	1	0	1	21.7239658505474	20.9256420135498	19.9243812561035	NaN	17.9866523742676	NaN	17.7293949127197	0	0.308005650838215	0	P53317	P53317	Nucleolar protein 19	NOP19	sp|P53317|NOP19_YEAST Nucleolar protein 19 OS=Saccharomyces cerevisiae (strain ATCC 204508 / S288c) OX=559292 GN=NOP19 PE=1 SV=1
NaN	20.4280815124512	20.874927520752	20.1367111206055	NaN	20.3270702362061	#VALUE!	#VALUE!	0.738216	1.66811	#VALUE!	#VALUE!			2	2	2	4.9	4.9	4.9	67.293	0	5.5155	22.3587456240063	4	1	0	1	1	0	2	17.6038581218428	NaN	15.473991394043	16.3259372711182	14.5909376144409	NaN	15.5161304473877	0	0.577639897664387	0	P53333	P53333	Pre-mRNA-splicing factor CWC22	CWC22	sp|P53333|CWC22_YEAST Pre-mRNA-splicing factor CWC22 OS=Saccharomyces cerevisiae (strain ATCC 204508 / S288c) OX=559292 GN=CWC22 PE=1 SV=1
23.1981754302979	NaN	22.1431407928467	NaN	21.7333889007568	NaN	#VALUE!	#VALUE!	#VALUE!	#VALUE!	#VALUE!	#VALUE!			4	4	4	10.4	10.4	10.4	65.347	0	20.047	25.5020011402866	6	0	4	1	0	1	0	22.0425664856078	21.8716602325439	NaN	17.8810062408447	NaN	17.8799304962158	NaN	0	NaN	0	P53389	P53389	Protein HOL1	HOL1	sp|P53389|HOL1_YEAST Protein HOL1 OS=Saccharomyces cerevisiae (strain ATCC 204508 / S288c) OX=559292 GN=HOL1 PE=1 SV=1
24.8263854980469	NaN	26.1033153533936	NaN	26.0914402008057	NaN	#VALUE!	#VALUE!	#VALUE!	#VALUE!	#VALUE!	#VALUE!			9	9	9	17.1	17.1	17.1	83.383	0	57.533	28.07709318856	19	0	6	8	0	5	0	23.7552160407916	22.0120220184326	NaN	22.6902561187744	NaN	21.5921783447266	NaN	0	NaN	0	P53394	P53394	Putative sulfate transporter YPR003C		sp|P53394|SULX_YEAST Putative sulfate transporter YPR003C OS=Saccharomyces cerevisiae (strain ATCC 204508 / S288c) OX=559292 GN=YPR003C PE=1 SV=1
NaN	NaN	19.9725303649902	20.6507949829102	NaN	NaN	#VALUE!	#VALUE!	-0.678265	0.624917	#VALUE!	#VALUE!			1	1	1	1.4	1.4	1.4	98.225	0.00026219	2.4878	21.2361380186579	2	0	0	1	1	0	1	15.8785538901944	NaN	NaN	15.1459722518921	14.550085067749	NaN	NaN	0	-0.678264617919922	0	P53540	P53540	Spindle pole body component SPC98	SPC98	sp|P53540|SPC98_YEAST Spindle pole body component SPC98 OS=Saccharomyces cerevisiae (strain ATCC 204508 / S288c) OX=559292 GN=SPC98 PE=1 SV=1
22.4949951171875	23.5011806488037	NaN	NaN	NaN	NaN	-1.00619	0.497861	#VALUE!	#VALUE!	#VALUE!	#VALUE!			2	2	2	13.6	13.6	13.6	24.859	0	3.2845	24.9427958247474	3	2	2	0	0	0	0	21.4833552591364	20.8935623168945	19.9080638885498	NaN	NaN	NaN	NaN	0	-1.00618553161621	0	P53615	P53615	Carbonic anhydrase	NCE103	sp|P53615|CAN_YEAST Carbonic anhydrase OS=Saccharomyces cerevisiae (strain ATCC 204508 / S288c) OX=559292 GN=NCE103 PE=1 SV=1
NaN	NaN	20.280481338501	21.1646595001221	20.3491649627686	NaN	#VALUE!	#VALUE!	-0.884178	0.541796	#VALUE!	#VALUE!			2	2	2	4	4	4	57.701	0	3.0113	23.4100227227402	3	0	1	1	1	1	1	18.7661988916336	17.9233512878418	NaN	16.1888790130615	15.7118549346924	16.0721950531006	NaN	0	-0.849836349487305	0	P53685	P53685	NAD-dependent protein deacetylase HST1	HST1	sp|P53685|HST1_YEAST NAD-dependent protein deacetylase HST1 OS=Saccharomyces cerevisiae (strain ATCC 204508 / S288c) OX=559292 GN=HST1 PE=1 SV=1
22.358585357666	23.5367069244385	NaN	NaN	NaN	22.4222412109375	-1.17812	0.441927	#VALUE!	#VALUE!	#VALUE!	#VALUE!			5	5	5	19.9	19.9	19.9	39.979	0	4.2576	25.1029355449404	5	4	2	0	1	0	1	21.0154967243865	19.7702865600586	19.8114624023438	NaN	17.6474437713623	NaN	16.6110820770264	0	-0.620888710021973	0	P53686	P53686	NAD-dependent protein deacetylase HST2	HST2	sp|P53686|HST2_YEAST NAD-dependent protein deacetylase HST2 OS=Saccharomyces cerevisiae (strain ATCC 204508 / S288c) OX=559292 GN=HST2 PE=1 SV=1
22.5874004364014	21.9889144897461	NaN	NaN	NaN	22.6102046966553	0.598486	1.51413	#VALUE!	#VALUE!	#VALUE!	#VALUE!			2	2	2	18	18	18	16.283	0	4.7209	25.4440799206786	5	1	2	1	0	1	1	22.2741517588239	21.7321472167969	19.0178623199463	18.9496040344238	NaN	18.6534748077393	17.0857620239258	0	0.287840843200684	0	P53724	P53724	54S ribosomal protein L50, mitochondrial	MRPL50	sp|P53724|RM50_YEAST 54S ribosomal protein L50, mitochondrial OS=Saccharomyces cerevisiae (strain ATCC 204508 / S288c) OX=559292 GN=MRPL50 PE=1 SV=1
22.4119110107422	22.6302757263184	NaN	NaN	NaN	NaN	-0.218365	0.859539	#VALUE!	#VALUE!	#VALUE!	#VALUE!			1	1	1	10.8	10.8	10.8	21.142	0	3.5958	24.4963735076131	3	1	1	0	0	0	0	21.4963369322973	21.0337562561035	19.6302661895752	NaN	NaN	NaN	NaN	0	-0.218364715576172	0	P53725	P53725	M-phase phosphoprotein 6 homolog	MPP6	sp|P53725|MPP6_YEAST M-phase phosphoprotein 6 homolog OS=Saccharomyces cerevisiae (strain ATCC 204508 / S288c) OX=559292 GN=MPP6 PE=1 SV=1
21.5972805023193	NaN	22.2681369781494	NaN	21.2815570831299	NaN	#VALUE!	#VALUE!	#VALUE!	#VALUE!	#VALUE!	#VALUE!			2	2	2	5.5	5.5	5.5	67.46	0	6.3771	24.3107043006108	4	0	1	2	0	1	0	20.3106349686051	19.2986259460449	NaN	19.1469860076904	NaN	16.1975631713867	NaN	0	NaN	0	P53735	P53735	Protein ZRG17	ZRG17	sp|P53735|ZRG17_YEAST Protein ZRG17 OS=Saccharomyces cerevisiae (strain ATCC 204508 / S288c) OX=559292 GN=ZRG17 PE=1 SV=1
23.9118690490723	20.8747024536133	22.2568683624268	NaN	22.5643482208252	NaN	3.03717	8.20877	#VALUE!	#VALUE!	#VALUE!	#VALUE!			5	5	5	13.7	13.7	13.7	44.542	0	10.521	25.9998524313387	9	1	4	3	0	2	0	21.9998610313252	21.5895748138428	15.8207025527954	19.2784404754639	NaN	18.3930969238281	NaN	0	2.03632609049479	0	P53740	P53740	Uncharacterized protein YNR048W		sp|P53740|YN8S_YEAST Probable phospholipid translocase non-catalytic subunit CRF1 OS=Saccharomyces cerevisiae (strain ATCC 204508 / S288c) OX=559292 GN=YNR048W PE=1 SV=1
23.7990703582764	NaN	21.5376319885254	NaN	NaN	NaN	#VALUE!	#VALUE!	#VALUE!	#VALUE!	#VALUE!	#VALUE!			4	4	4	8.6	8.6	8.6	68.081	0	4.5709	25.5969613403661	6	0	4	1	0	0	0	20.7390059287431	20.6470222473145	NaN	16.7210731506348	NaN	NaN	NaN	0	NaN	0	P53745	P53745	Probable alpha-1,3-mannosyltransferase MNT4	MNT4	sp|P53745|MNT4_YEAST Probable alpha-1,3-mannosyltransferase MNT4 OS=Saccharomyces cerevisiae (strain ATCC 204508 / S288c) OX=559292 GN=MNT4 PE=3 SV=1
26.7988471984863	25.2823123931885	NaN	NaN	NaN	NaN	1.51653	2.86103	#VALUE!	#VALUE!	#VALUE!	#VALUE!			7	7	7	11.7	11.7	11.7	82.014	0	21.546	28.5770468787486	14	6	6	0	0	0	0	23.4071723140088	23.2527465820313	20.1066131591797	NaN	NaN	NaN	NaN	0	1.51653480529785	0	P53746	P53746	Ferric reductase transmembrane component 4	FRE4	sp|P53746|FRE4_YEAST Ferric reductase transmembrane component 4 OS=Saccharomyces cerevisiae (strain ATCC 204508 / S288c) OX=559292 GN=FRE4 PE=2 SV=1
28.2863025665283	23.5417957305908	22.1254348754883	NaN	NaN	NaN	4.74451	26.8064	#VALUE!	#VALUE!	#VALUE!	#VALUE!			5	5	5	32	32	32	24.317	0	12.097	29.9383154017648	9	2	5	1	0	0	0	26.4788332991362	26.4536247253418	19.912691116333	19.2726898193359	NaN	NaN	NaN	0	1.66407299041748	0	P53747	P53747	Uncharacterized vacuolar membrane protein YNR061C		sp|P53747|YN8Z_YEAST Uncharacterized vacuolar membrane protein YNR061C OS=Saccharomyces cerevisiae (strain ATCC 204508 / S288c) OX=559292 GN=YNR061C PE=1 SV=1
28.2121067047119	23.6693630218506	NaN	NaN	23.046817779541	NaN	4.54274	23.3078	#VALUE!	#VALUE!	#VALUE!	#VALUE!			12	5	0	34.1	17.8	0	45.288	0	21.507	29.8796437278153	12	2	5	1	0	3	0	25.7097245684143	25.6797885894775	19.1683235168457	NaN	NaN	19.0369510650635	NaN	0	1.96009922027588	0	P53822	P53822	Protein COS1	COS1	sp|P53822|COS1_YEAST Protein COS1 OS=Saccharomyces cerevisiae (strain ATCC 204508 / S288c) OX=559292 GN=COS1 PE=1 SV=1
NaN	NaN	NaN	23.0714473724365	21.5723743438721	23.4765491485596	#VALUE!	#VALUE!	#VALUE!	#VALUE!	-1.90417	0.267169			1	1	1	9.2	9.2	9.2	22.611	0	3.132	23.9955028750783	3	0	0	0	1	1	1	20.8255519954659	NaN	NaN	NaN	19.1583728790283	18.6794452667236	19.7027778625488	0	-1.70162391662598	0	P53833	P53833	Ribonucleases P/MRP protein subunit POP3	POP3	sp|P53833|POP3_YEAST Ribonucleases P/MRP protein subunit POP3 OS=Saccharomyces cerevisiae (strain ATCC 204508 / S288c) OX=559292 GN=POP3 PE=1 SV=1
NaN	NaN	28.3888263702393	28.2209873199463	NaN	NaN	#VALUE!	#VALUE!	0.167839	1.12337	#VALUE!	#VALUE!			3	3	3	3.6	3.6	3.6	141.12	0.002574	1.9666	29.9560156933648	6	1	0	2	1	1	1	23.9337309904748	NaN	14.5572843551636	23.8094100952148	14.7715930938721	NaN	20.2773056030273	0	0.167839050292969	0	P53840	P53840	Topoisomerase 1-associated factor 1	TOF1	sp|P53840|TOF1_YEAST Topoisomerase 1-associated factor 1 OS=Saccharomyces cerevisiae (strain ATCC 204508 / S288c) OX=559292 GN=TOF1 PE=1 SV=1
NaN	NaN	NaN	19.7897090911865	19.8371200561523	19.3785018920898	#VALUE!	#VALUE!	#VALUE!	#VALUE!	0.458618	1.37422			2	2	2	1.8	1.8	1.8	178.41	0	3.1748	23.2142455914217	5	0	1	1	1	1	1	16.8567173063676	16.501293182373	NaN	NaN	12.6890153884888	13.7565565109253	12.4171142578125	0	0.25301456451416	0	P53855	P53855	Autophagy-related protein 2	ATG2	sp|P53855|ATG2_YEAST Autophagy-related protein 2 OS=Saccharomyces cerevisiae (strain ATCC 204508 / S288c) OX=559292 GN=ATG2 PE=1 SV=1
20.5014476776123	21.6753425598145	20.4702053070068	NaN	NaN	NaN	-1.17389	0.443223	#VALUE!	#VALUE!	#VALUE!	#VALUE!			4	4	4	8.8	8.8	8.8	63.917	0	3.3923	23.2840446283745	5	2	1	1	1	0	1	18.8245734600849	16.6805801391602	17.5487174987793	16.4004955291748	14.3941278457642	NaN	15.8593168258667	0	-1.18951606750488	0	P53870	P53870	Uncharacterized protein YNL193W		sp|P53870|YNT3_YEAST Uncharacterized protein YNL193W OS=Saccharomyces cerevisiae (strain ATCC 204508 / S288c) OX=559292 GN=YNL193W PE=4 SV=2
NaN	21.6246643066406	NaN	NaN	NaN	22.1850433349609	#VALUE!	#VALUE!	#VALUE!	#VALUE!	#VALUE!	#VALUE!			3	3	3	11.5	11.5	11.5	40.18	0.0058733	1.73	23.4142878041309	3	2	1	0	0	0	1	19.4143136147067	17.9282169342041	18.4231643676758	NaN	NaN	NaN	16.5774002075195	0	NaN	0	P53871	P53871	Probable glutamine amidotransferase DUG3	DUG3	sp|P53871|DUG3_YEAST Probable glutamine amidotransferase DUG3 OS=Saccharomyces cerevisiae (strain ATCC 204508 / S288c) OX=559292 GN=DUG3 PE=1 SV=1
21.7353744506836	22.6922359466553	NaN	NaN	NaN	21.5846290588379	-0.956861	0.515176	#VALUE!	#VALUE!	#VALUE!	#VALUE!			4	4	4	14.6	14.6	14.6	34.897	0	43.346	24.2025459482337	8	2	3	1	0	0	2	19.8806178533463	18.9281024932861	18.5562973022461	NaN	NaN	NaN	16.3059196472168	0	-0.403058052062988	0	P53881	P53881	54S ribosomal protein L22, mitochondrial	MRPL22	sp|P53881|RM22_YEAST 54S ribosomal protein L22, mitochondrial OS=Saccharomyces cerevisiae (strain ATCC 204508 / S288c) OX=559292 GN=MRPL22 PE=1 SV=2
20.0511245727539	20.2906398773193	NaN	NaN	NaN	19.9370403289795	-0.239515	0.84703	#VALUE!	#VALUE!	#VALUE!	#VALUE!			2	2	2	11.5	11.5	11.5	46.225	0	6.5296	23.9892787631448	4	1	1	1	2	2	1	19.4043058664573	17.1589641571045	15.6771965026855	17.1426048278809	15.63685131073	18.0573253631592	14.704984664917	0	-0.0627155303955078	0	P53901	P53901	Ingression protein 1	INN1	sp|P53901|INN1_YEAST Ingression protein 1 OS=Saccharomyces cerevisiae (strain ATCC 204508 / S288c) OX=559292 GN=INN1 PE=1 SV=1
20.2508392333984	NaN	20.4631366729736	NaN	20.4351215362549	NaN	#VALUE!	#VALUE!	#VALUE!	#VALUE!	#VALUE!	#VALUE!			2	2	2	2.8	2.8	2.8	73.801	0	6.4866	22.8663869768029	5	0	1	1	0	2	0	18.6184500297564	17.6247806549072	NaN	16.7462253570557	NaN	16.464147567749	NaN	0	NaN	0	P53918	P53918	Uncharacterized transporter ESBP6	ESBP6	sp|P53918|ESBP6_YEAST Uncharacterized transporter ESBP6 OS=Saccharomyces cerevisiae (strain ATCC 204508 / S288c) OX=559292 GN=ESBP6 PE=1 SV=1
23.1195430755615	23.6930675506592	NaN	21.808723449707	NaN	22.5126304626465	-0.573524	0.671973	#VALUE!	#VALUE!	#VALUE!	#VALUE!			5	5	5	26.4	26.4	26.4	22.472	0	3.3697	25.6427881262185	8	4	4	0	1	0	2	21.9423484080774	21.3505687713623	19.7358531951904	NaN	16.1794815063477	NaN	18.6402244567871	0	0.448069254557293	0	P53949	P53949	Tyrosine-protein phosphatase-like protein OCA2	OCA2	sp|P53949|OCA2_YEAST Tyrosine-protein phosphatase-like protein OCA2 OS=Saccharomyces cerevisiae (strain ATCC 204508 / S288c) OX=559292 GN=OCA2 PE=1 SV=1
NaN	NaN	20.5282173156738	NaN	20.6028614044189	NaN	#VALUE!	#VALUE!	#VALUE!	#VALUE!	#VALUE!	#VALUE!			2	2	2	17.4	17.4	17.4	19.35	0.00026137	2.3858	23.2769649447154	4	0	2	1	0	1	0	20.4696100226578	19.7209720611572	NaN	18.251880645752	NaN	18.0724773406982	NaN	0	NaN	0	P53956	P53956	Uncharacterized endoplasmic reticulum membrane protein YNL046W		sp|P53956|YNE6_YEAST Uncharacterized endoplasmic reticulum membrane protein YNL046W OS=Saccharomyces cerevisiae (strain ATCC 204508 / S288c) OX=559292 GN=YNL046W PE=1 SV=1
22.1454448699951	21.3221263885498	NaN	NaN	22.6843814849854	NaN	0.823318	1.76947	#VALUE!	#VALUE!	#VALUE!	#VALUE!			2	2	2	12.2	12.2	12.2	26.816	0	10.732	25.0551520021007	6	2	2	1	0	1	0	21.2478301860837	20.8329086303711	18.0628681182861	NaN	NaN	18.4107990264893	NaN	0	1.09278678894043	0	P53961	P53961	Phosphatidylinositol N-acetylglucosaminyltransferase subunit GPI15	GPI15	sp|P53961|GPI15_YEAST Phosphatidylinositol N-acetylglucosaminyltransferase subunit GPI15 OS=Saccharomyces cerevisiae (strain ATCC 204508 / S288c) OX=559292 GN=GPI15 PE=3 SV=2
26.0392780303955	22.1935806274414	NaN	NaN	21.3900032043457	NaN	3.8457	14.3771	#VALUE!	#VALUE!	#VALUE!	#VALUE!			7	7	7	18.2	18.2	18.2	61.727	0	26.742	27.6538296509665	8	1	7	0	0	1	0	23.068891744922	22.9799957275391	18.5210247039795	NaN	NaN	17.1907501220703	NaN	0	1.5210599899292	0	P53966	P53966	Probable mannosyltransferase KTR5	KTR5	sp|P53966|KTR5_YEAST Probable mannosyltransferase KTR5 OS=Saccharomyces cerevisiae (strain ATCC 204508 / S288c) OX=559292 GN=KTR5 PE=1 SV=1
NaN	NaN	19.9412021636963	20.40207862854	20.0556316375732	NaN	#VALUE!	#VALUE!	-0.460876	0.726545	#VALUE!	#VALUE!			4	4	4	9.5	9.5	9.5	60.705	0	3.6155	22.2266450275982	4	1	0	2	2	1	1	17.2266567859352	NaN	15.710241317749	15.0017604827881	15.1504220962524	14.9003477096558	NaN	0	-0.403661727905273	0	P54791	P54791	Origin recognition complex subunit 4	ORC4	sp|P54791|ORC4_YEAST Origin recognition complex subunit 4 OS=Saccharomyces cerevisiae (strain ATCC 204508 / S288c) OX=559292 GN=ORC4 PE=1 SV=1
NaN	NaN	NaN	21.4061336517334	NaN	21.1841659545898	#VALUE!	#VALUE!	#VALUE!	#VALUE!	#VALUE!	#VALUE!			2	2	2	24.5	24.5	24.5	10.848	0.0012963	2.1934	25.9849840564101	3	0	0	1	1	1	1	22.9849927454859	NaN	NaN	21.6697750091553	17.6629600524902	22.1212348937988	17.5803470611572	0	NaN	0	P69850	P69850	DASH complex subunit DAD3	DAD3	sp|P69850|DAD3_YEAST DASH complex subunit DAD3 OS=Saccharomyces cerevisiae (strain ATCC 204508 / S288c) OX=559292 GN=DAD3 PE=1 SV=1
NaN	NaN	NaN	NaN	NaN	20.8290405273438	#VALUE!	#VALUE!	#VALUE!	#VALUE!	#VALUE!	#VALUE!			1	1	1	15.9	15.9	15.9	8.0881	0.0093458	1.4779	20.2251744802659	2	0	0	0	1	0	1	17.9032463853785	NaN	NaN	NaN	NaN	NaN	17.9032459259033	0	NaN	0	P69852	P69852	DASH complex subunit HSK3	HSK3	sp|P69852|HSK3_YEAST DASH complex subunit HSK3 OS=Saccharomyces cerevisiae (strain ATCC 204508 / S288c) OX=559292 GN=HSK3 PE=1 SV=1
23.0680389404297	NaN	NaN	NaN	NaN	NaN	#VALUE!	#VALUE!	#VALUE!	#VALUE!	#VALUE!	#VALUE!			2	2	2	43.6	43.6	43.6	6.1384	0	20.005	24.6899250522641	4	0	2	0	0	0	0	24.6899250522641	24.6899242401123	NaN	NaN	NaN	NaN	NaN	0	NaN	0	P87284	P87284	Plasma membrane proteolipid 3	PMP3	sp|P87284|PMP3_YEAST Plasma membrane proteolipid 3 OS=Saccharomyces cerevisiae (strain ATCC 204508 / S288c) OX=559292 GN=PMP3 PE=1 SV=1
NaN	NaN	NaN	25.7178516387939	NaN	NaN	#VALUE!	#VALUE!	#VALUE!	#VALUE!	#VALUE!	#VALUE!			1	1	1	1.5	1.5	1.5	69.069	0.00026316	2.6091	24.9746943083676	1	0	0	0	1	0	0	19.6892916519405	NaN	NaN	NaN	19.6892910003662	NaN	NaN	0	NaN	0	Q01649	Q01649	Spindle pole body-associated protein CIK1	CIK1	sp|Q01649|CIK1_YEAST Spindle pole body-associated protein CIK1 OS=Saccharomyces cerevisiae (strain ATCC 204508 / S288c) OX=559292 GN=CIK1 PE=1 SV=1
24.7742958068848	NaN	24.2751178741455	NaN	23.5294570922852	NaN	#VALUE!	#VALUE!	#VALUE!	#VALUE!	#VALUE!	#VALUE!			12	12	12	16.7	16.7	16.7	129.98	0	22.396	26.9434666896937	16	0	8	6	1	4	0	21.1105699684234	20.4693126678467	NaN	18.8713817596436	12.907078742981	18.3111457824707	NaN	0	NaN	0	Q01846	Q01846	Structural protein MDM1	MDM1	sp|Q01846|MDM1_YEAST Structural protein MDM1 OS=Saccharomyces cerevisiae (strain ATCC 204508 / S288c) OX=559292 GN=MDM1 PE=1 SV=3
NaN	NaN	23.4113159179688	22.2419376373291	22.7064075469971	NaN	#VALUE!	#VALUE!	1.16938	2.24915	#VALUE!	#VALUE!			4	4	4	6	6	6	98.702	0	6.1271	24.9364743988016	6	1	0	3	1	2	0	19.155114685277	NaN	15.3101511001587	18.4565544128418	14.2982778549194	17.3171653747559	NaN	0	0.816924095153809	0	Q02207	Q02207	Peroxisomal hydratase-dehydrogenase-epimerase;2-enoyl-CoA hydratase;(3R)-3-hydroxyacyl-CoA dehydrogenase	FOX2	sp|Q02207|FOX2_YEAST Peroxisomal hydratase-dehydrogenase-epimerase OS=Saccharomyces cerevisiae (strain ATCC 204508 / S288c) OX=559292 GN=FOX2 PE=2 SV=1
21.4300746917725	NaN	21.397855758667	20.2105045318604	20.8363037109375	NaN	#VALUE!	#VALUE!	1.18735	2.27734	#VALUE!	#VALUE!			3	3	3	7	7	7	86.365	0	7.3317	23.6674156413504	5	0	1	1	2	3	0	18.538105552639	17.3314075469971	NaN	15.8651294708252	14.7972059249878	16.9609298706055	NaN	0	1.0109068552653	0	Q02208	Q02208	Topoisomerase 1-associated factor 2	TOF2	sp|Q02208|TOF2_YEAST Topoisomerase 1-associated factor 2 OS=Saccharomyces cerevisiae (strain ATCC 204508 / S288c) OX=559292 GN=TOF2 PE=1 SV=1
21.7971305847168	NaN	NaN	NaN	NaN	NaN	#VALUE!	#VALUE!	#VALUE!	#VALUE!	#VALUE!	#VALUE!			3	3	3	8.9	8.9	8.9	42.782	0	3.98	23.7101976952197	3	0	2	1	0	0	0	19.71021451465	19.4189929962158	NaN	17.2584743499756	NaN	NaN	NaN	0	NaN	0	Q02732	Q02732	Central kinetochore subunit CTF19	CTF19	sp|Q02732|CENPP_YEAST Inner kinetochore subunit CTF19 OS=Saccharomyces cerevisiae (strain ATCC 204508 / S288c) OX=559292 GN=CTF19 PE=1 SV=1
22.5342864990234	22.1396808624268	NaN	NaN	NaN	22.2773342132568	0.394606	1.31458	#VALUE!	#VALUE!	#VALUE!	#VALUE!			3	3	3	8.6	8.6	8.6	44.636	0	3.5853	24.7127184210344	4	3	3	0	0	0	2	20.3203642692993	19.8076324462891	18.0600738525391	NaN	NaN	NaN	16.8529434204102	0	0.325778961181641	0	Q02775	Q02775	Pre-mRNA-splicing factor SLU7	SLU7	sp|Q02775|SLU7_YEAST Pre-mRNA-splicing factor SLU7 OS=Saccharomyces cerevisiae (strain ATCC 204508 / S288c) OX=559292 GN=SLU7 PE=1 SV=1
NaN	NaN	21.5008659362793	NaN	21.1640453338623	20.0202522277832	#VALUE!	#VALUE!	#VALUE!	#VALUE!	1.14379	2.20961			2	2	2	7.6	7.6	7.6	56.919	0	8.3179	22.9014466025672	3	0	0	1	0	2	1	18.2010326640349	NaN	NaN	17.3314933776855	NaN	16.740571975708	14.7160158157349	0	1.3122034072876	0	Q02863	Q02863	Ubiquitin carboxyl-terminal hydrolase 16	UBP16	sp|Q02863|UBP16_YEAST Ubiquitin carboxyl-terminal hydrolase 16 OS=Saccharomyces cerevisiae (strain ATCC 204508 / S288c) OX=559292 GN=UBP16 PE=1 SV=1
NaN	22.5639533996582	20.8923034667969	21.462438583374	NaN	20.7079257965088	#VALUE!	#VALUE!	-0.570135	0.673554	#VALUE!	#VALUE!			2	2	2	25	25	25	18.435	0	3.0304	23.301174639356	3	2	0	1	2	0	1	20.301174639356	NaN	19.1114864349365	17.463077545166	18.876127243042	NaN	15.9594812393188	0	-0.685802459716797	0	Q02864	Q02864	Uncharacterized protein YPL071C	YPL071C	sp|Q02864|YP071_YEAST Uncharacterized protein YPL071C OS=Saccharomyces cerevisiae (strain ATCC 204508 / S288c) OX=559292 GN=YPL071C PE=1 SV=1
22.4177169799805	23.4560089111328	NaN	NaN	NaN	23.5198936462402	-1.03829	0.486904	#VALUE!	#VALUE!	#VALUE!	#VALUE!			5	5	5	12.9	12.9	12.9	58.534	0	4.0971	25.3334037945194	10	5	5	0	0	0	2	20.3792006593137	19.3177165985107	19.1700859069824	NaN	NaN	NaN	16.8783149719238	0	-1.07023429870605	0	Q02939	Q02939	RNA polymerase II transcription factor B subunit 2	TFB2	sp|Q02939|TFB2_YEAST General transcription and DNA repair factor IIH subunit TFB2 OS=Saccharomyces cerevisiae (strain ATCC 204508 / S288c) OX=559292 GN=TFB2 PE=1 SV=1
24.7603015899658	NaN	25.1455383300781	18.6108303070068	24.8465156555176	NaN	#VALUE!	#VALUE!	6.53471	92.7135	#VALUE!	#VALUE!			13	12	12	25.9	24.6	24.6	97.692	0	47.022	27.4042187972975	25	0	9	8	1	8	0	21.9123250885552	20.8606014251709	NaN	20.3079700469971	12.1399984359741	19.4978675842285	NaN	0	6.30662155151367	0	Q03002	Q03002	Fatty acyl-CoA synthetase and RNA processing-associated kinase 1	FRK1	sp|Q03002|FRK1_YEAST Fatty acyl-CoA synthetase and RNA processing-associated kinase 1 OS=Saccharomyces cerevisiae (strain ATCC 204508 / S288c) OX=559292 GN=FRK1 PE=1 SV=1
NaN	NaN	19.6095142364502	20.7838878631592	NaN	21.2622413635254	#VALUE!	#VALUE!	-1.17437	0.443076	#VALUE!	#VALUE!			1	1	1	3.5	3.5	3.5	38.585	0.0018088	2.098	21.8911532762365	3	0	0	1	1	0	1	17.8036644703219	NaN	NaN	16.0530986785889	15.9532413482666	NaN	16.5709381103516	0	-1.41355037689209	0	Q03049	Q03049	Putative uncharacterized oxidoreductase YDR541C	YDR541C	sp|Q03049|YD541_YEAST Putative uncharacterized oxidoreductase YDR541C OS=Saccharomyces cerevisiae (strain ATCC 204508 / S288c) OX=559292 GN=YDR541C PE=3 SV=2
24.9605350494385	25.391918182373	NaN	NaN	NaN	NaN	-0.431383	0.741551	#VALUE!	#VALUE!	#VALUE!	#VALUE!			5	5	5	29	29	29	24.906	0	28.325	27.1565349343245	15	5	5	0	0	0	0	23.5716110078213	23.1017665863037	21.7243824005127	NaN	NaN	NaN	NaN	0	-0.43138313293457	0	Q03144	Q03144	Pyridoxal 5-phosphate synthase subunit SNO1	SNO1	sp|Q03144|SNO1_YEAST Pyridoxal 5-phosphate synthase subunit SNO1 OS=Saccharomyces cerevisiae (strain ATCC 204508 / S288c) OX=559292 GN=SNO1 PE=1 SV=1
22.2832527160645	NaN	NaN	NaN	NaN	NaN	#VALUE!	#VALUE!	#VALUE!	#VALUE!	#VALUE!	#VALUE!			1	1	1	4.2	4.2	4.2	34.63	0.0086251	1.5361	23.9050880090092	1	0	1	0	0	0	0	21.0977698219869	21.097770690918	NaN	NaN	NaN	NaN	NaN	0	NaN	0	Q03193	Q03193	Uncharacterized membrane protein YDR090C	YDR090C	sp|Q03193|YD090_YEAST Uncharacterized membrane protein YDR090C OS=Saccharomyces cerevisiae (strain ATCC 204508 / S288c) OX=559292 GN=YDR090C PE=1 SV=1
NaN	NaN	25.5002994537354	25.1605415344238	25.597843170166	NaN	#VALUE!	#VALUE!	0.339758	1.26554	#VALUE!	#VALUE!			4	4	4	6.5	6.5	6.5	100.47	0	4.0842	27.2260055237011	5	0	2	1	2	1	0	21.6410356707123	19.1306400299072	NaN	16.115795135498	19.4606189727783	20.8605270385742	NaN	0	0.388529777526855	0	Q03306	Q03306	Serine/threonine-protein kinase PKH3	PKH3	sp|Q03306|PKH3_YEAST Serine/threonine-protein kinase PKH3 OS=Saccharomyces cerevisiae (strain ATCC 204508 / S288c) OX=559292 GN=PKH3 PE=1 SV=1
21.3805751800537	NaN	22.0695972442627	NaN	22.4040298461914	NaN	#VALUE!	#VALUE!	#VALUE!	#VALUE!	#VALUE!	#VALUE!			5	5	5	13.9	13.9	13.9	57.542	0	6.7781	24.5852018807104	9	1	2	2	1	2	1	19.8303418909433	18.6523895263672	NaN	16.9567394256592	14.9496898651123	18.1957092285156	15.8997106552124	0	NaN	0	Q03327	Q03327	Mitochondrial fusion and transport protein UGO1	UGO1	sp|Q03327|UGO1_YEAST Mitochondrial fusion and transport protein UGO1 OS=Saccharomyces cerevisiae (strain ATCC 204508 / S288c) OX=559292 GN=UGO1 PE=1 SV=3
NaN	NaN	21.0469341278076	NaN	21.3854808807373	21.4071731567383	#VALUE!	#VALUE!	#VALUE!	#VALUE!	-0.0216923	0.985077			2	2	2	7.7	7.7	7.7	55.87	0	7.0979	23.1029355449404	4	0	0	2	0	1	2	18.4590793551657	NaN	NaN	17.6044368743896	NaN	16.7250728607178	15.6868009567261	0	-0.19096565246582	0	Q03338	Q03338	U4/U6 small nuclear ribonucleoprotein PRP3	PRP3	sp|Q03338|PRP3_YEAST U4/U6 small nuclear ribonucleoprotein PRP3 OS=Saccharomyces cerevisiae (strain ATCC 204508 / S288c) OX=559292 GN=PRP3 PE=1 SV=1
23.3079986572266	NaN	24.0598621368408	NaN	23.6483402252197	NaN	#VALUE!	#VALUE!	#VALUE!	#VALUE!	#VALUE!	#VALUE!			6	6	6	20.2	20.2	20.2	63.542	0	21.005	25.981547772032	9	0	2	4	0	5	0	21.0746354017022	19.4131355285645	NaN	19.6019744873047	NaN	19.4468574523926	NaN	0	NaN	0	Q03370	Q03370	Peroxisomal membrane protein PEX29	PEX29	sp|Q03370|PEX29_YEAST Peroxisomal membrane protein PEX29 OS=Saccharomyces cerevisiae (strain ATCC 204508 / S288c) OX=559292 GN=PEX29 PE=1 SV=1
NaN	NaN	19.972110748291	20.3698616027832	19.9075946807861	NaN	#VALUE!	#VALUE!	-0.397751	0.759041	#VALUE!	#VALUE!			2	2	2	13.3	13.3	13.3	36.879	0	19.374	21.7336790486941	3	0	0	2	1	1	0	18.0332186454186	NaN	NaN	16.8027191162109	15.9262495040894	16.4841156005859	NaN	0	-0.430008888244629	0	Q03373	Q03373	Down-regulator of invasive growth 2	DIG2	sp|Q03373|DIG2_YEAST Down-regulator of invasive growth 2 OS=Saccharomyces cerevisiae (strain ATCC 204508 / S288c) OX=559292 GN=DIG2 PE=1 SV=1
22.5937519073486	22.4775371551514	22.3857173919678	NaN	23.0057830810547	NaN	0.116215	1.08389	#VALUE!	#VALUE!	#VALUE!	#VALUE!			4	4	4	11.1	11.1	11.1	54.106	0	8.8098	25.1616178346177	9	2	2	3	0	3	0	20.2547656775635	18.0484657287598	16.8037281036377	18.4518547058105	NaN	18.9516258239746	NaN	0	0.184213638305664	0	Q03508	Q03508	Uncharacterized protein YMR265C		sp|Q03508|YM8F_YEAST Uncharacterized protein YMR265C OS=Saccharomyces cerevisiae (strain ATCC 204508 / S288c) OX=559292 GN=YMR265C PE=4 SV=1
23.2768230438232	21.4508590698242	NaN	NaN	NaN	NaN	1.82596	3.54544	#VALUE!	#VALUE!	#VALUE!	#VALUE!			4	4	4	25.1	25.1	25.1	23.949	0	12.782	25.0848064418336	4	2	4	0	0	0	0	21.7628783469462	21.6719341278076	17.729793548584	NaN	NaN	NaN	NaN	0	1.82596397399902	0	Q03525	Q03525	Protein TMA23	TMA23	sp|Q03525|TMA23_YEAST Protein TMA23 OS=Saccharomyces cerevisiae (strain ATCC 204508 / S288c) OX=559292 GN=TMA23 PE=1 SV=2
NaN	NaN	22.6517810821533	21.8943767547607	22.6996898651123	NaN	#VALUE!	#VALUE!	0.757404	1.69045	#VALUE!	#VALUE!			4	4	4	15.3	15.3	15.3	38.023	0	10.705	24.7996132477964	8	1	2	3	1	3	0	20.992238564688	18.7954750061035	16.3255519866943	19.4943561553955	16.0066337585449	19.5057773590088	NaN	0	0.78135871887207	0	Q03703	Q03703	Uncharacterized protein YML037C	YML037C	sp|Q03703|YMD7_YEAST Uncharacterized protein YML037C OS=Saccharomyces cerevisiae (strain ATCC 204508 / S288c) OX=559292 GN=YML037C PE=1 SV=1
NaN	NaN	19.9312648773193	NaN	20.5511226654053	NaN	#VALUE!	#VALUE!	#VALUE!	#VALUE!	#VALUE!	#VALUE!			2	2	2	4.4	4.4	4.4	65.144	0	3.4932	21.6567425686915	3	0	0	2	0	2	0	16.6123789942437	NaN	NaN	15.4179182052612	NaN	15.7836885452271	NaN	0	NaN	0	Q03776	Q03776	U1 small nuclear ribonucleoprotein component PRP42	PRP42	sp|Q03776|PRP42_YEAST U1 small nuclear ribonucleoprotein component PRP42 OS=Saccharomyces cerevisiae (strain ATCC 204508 / S288c) OX=559292 GN=PRP42 PE=1 SV=1
NaN	NaN	23.3175525665283	NaN	23.6660079956055	NaN	#VALUE!	#VALUE!	#VALUE!	#VALUE!	#VALUE!	#VALUE!			3	3	3	8.8	8.8	8.8	60.043	0	9.7365	24.9025602299821	5	0	0	3	0	3	0	20.3789890739147	NaN	NaN	19.4003086090088	NaN	19.357349395752	NaN	0	NaN	0	Q03795	Q03795	Uncharacterized membrane protein YMR155W		sp|Q03795|YM30_YEAST Uncharacterized membrane protein YMR155W OS=Saccharomyces cerevisiae (strain ATCC 204508 / S288c) OX=559292 GN=YMR155W PE=1 SV=1
21.4529209136963	NaN	21.427417755127	NaN	21.587423324585	NaN	#VALUE!	#VALUE!	#VALUE!	#VALUE!	#VALUE!	#VALUE!			3	3	3	4.1	4.1	4.1	81.466	0.00104	2.2653	23.8868813727689	4	0	1	2	0	3	0	18.6774168464853	17.5303153991699	NaN	16.4945125579834	NaN	17.0701217651367	NaN	0	NaN	0	Q03824	Q03824	Inheritance of peroxisomes protein 2	INP2	sp|Q03824|INP2_YEAST Inheritance of peroxisomes protein 2 OS=Saccharomyces cerevisiae (strain ATCC 204508 / S288c) OX=559292 GN=INP2 PE=1 SV=1
21.4833545684814	NaN	20.5781002044678	NaN	NaN	NaN	#VALUE!	#VALUE!	#VALUE!	#VALUE!	#VALUE!	#VALUE!			2	2	2	7.6	7.6	7.6	53.729	0	6.0534	23.4279030827413	2	0	2	1	0	0	0	18.620599296509	18.2978649139404	NaN	16.3017997741699	NaN	NaN	NaN	0	NaN	0	Q03983	Q03983	Uncharacterized protein YDR179W-A		sp|Q03983|YD179_YEAST Uncharacterized protein YDR179W-A OS=Saccharomyces cerevisiae (strain ATCC 204508 / S288c) OX=559292 GN=YDR179W-A PE=1 SV=2
NaN	NaN	NaN	21.3448925018311	NaN	22.6644458770752	#VALUE!	#VALUE!	#VALUE!	#VALUE!	#VALUE!	#VALUE!			3	3	3	2.1	2.1	2.1	171.1	0	4.3048	27.0246427512388	3	1	1	0	1	0	2	20.7578424735448	20.6473731994629	15.7003316879272	NaN	14.3349714279175	NaN	15.7938318252563	0	NaN	0	Q04002	Q04002	Sister chromatid cohesion protein 2	SCC2	sp|Q04002|SCC2_YEAST Sister chromatid cohesion protein 2 OS=Saccharomyces cerevisiae (strain ATCC 204508 / S288c) OX=559292 GN=SCC2 PE=1 SV=1
NaN	NaN	NaN	21.2747497558594	NaN	24.6728191375732	#VALUE!	#VALUE!	#VALUE!	#VALUE!	#VALUE!	#VALUE!			6	6	6	9.5	9.5	9.5	98.33	0	3.8253	24.4509217588607	7	1	1	0	5	0	2	19.2029942454171	16.2071285247803	14.7632122039795	NaN	16.0812339782715	NaN	18.7163581848145	0	NaN	0	Q04007	Q04007	Uncharacterized protein YDR186C	YDR186C	sp|Q04007|SND1_YEAST SRP-independent targeting protein 1 OS=Saccharomyces cerevisiae (strain ATCC 204508 / S288c) OX=559292 GN=SND1 PE=1 SV=1
NaN	21.2661933898926	NaN	NaN	NaN	20.5479259490967	#VALUE!	#VALUE!	#VALUE!	#VALUE!	#VALUE!	#VALUE!			1	1	1	3.7	3.7	3.7	39.354	0.0038471	1.8823	21.7516045318697	1	1	0	0	0	0	1	17.5036239005786	NaN	17.0182437896729	NaN	NaN	NaN	15.6961526870728	0	NaN	0	Q04087	Q04087	Monopolin complex subunit LRS4	LRS4	sp|Q04087|LRS4_YEAST Monopolin complex subunit LRS4 OS=Saccharomyces cerevisiae (strain ATCC 204508 / S288c) OX=559292 GN=LRS4 PE=1 SV=1
NaN	NaN	22.8582706451416	NaN	23.2201042175293	NaN	#VALUE!	#VALUE!	#VALUE!	#VALUE!	#VALUE!	#VALUE!			2	2	2	9.3	9.3	9.3	70.147	0	10.05	24.5056700774136	5	0	0	2	0	1	0	20.598779481805	NaN	NaN	20.1240158081055	NaN	18.7643852233887	NaN	0	NaN	0	Q04121	Q04121	Endosomal/prevacuolar sodium/hydrogen exchanger	NHX1	sp|Q04121|NHX1_YEAST Endosomal/prevacuolar sodium/hydrogen exchanger OS=Saccharomyces cerevisiae (strain ATCC 204508 / S288c) OX=559292 GN=NHX1 PE=1 SV=1
25.0044460296631	NaN	24.9845924377441	NaN	25.2889804840088	NaN	#VALUE!	#VALUE!	#VALUE!	#VALUE!	#VALUE!	#VALUE!			6	6	6	15.3	15.3	15.3	61.508	0	19.287	27.4951843349539	11	0	3	5	0	5	0	23.1028554730635	21.9020175933838	NaN	21.2745208740234	NaN	21.2837047576904	NaN	0	NaN	0	Q04162	Q04162	Probable metabolite transport protein YDR387C	YDR387C	sp|Q04162|YD387_YEAST Probable metabolite transport protein YDR387C OS=Saccharomyces cerevisiae (strain ATCC 204508 / S288c) OX=559292 GN=YDR387C PE=1 SV=1
NaN	NaN	21.0410633087158	NaN	21.1540641784668	NaN	#VALUE!	#VALUE!	#VALUE!	#VALUE!	#VALUE!	#VALUE!			2	2	2	6.1	6.1	6.1	39.186	0.0081404	1.5878	24.12675865959	2	0	0	1	1	1	0	20.0392564386385	NaN	NaN	17.4846343994141	19.4731826782227	17.3436012268066	NaN	0	NaN	0	Q04216	Q04216	Defect at low temperature protein 1	DLT1	sp|Q04216|DLT1_YEAST Defect at low temperature protein 1 OS=Saccharomyces cerevisiae (strain ATCC 204508 / S288c) OX=559292 GN=DLT1 PE=1 SV=1
22.3659439086914	NaN	23.3070259094238	21.2558040618896	23.881010055542	NaN	#VALUE!	#VALUE!	2.05122	4.14457	#VALUE!	#VALUE!			5	5	5	16.3	16.3	16.3	45.992	0	3.8225	25.7097771457223	6	0	2	4	1	4	0	21.0093584579678	19.1458930969238	NaN	19.0206871032715	14.1158561706543	19.9039821624756	NaN	0	1.92885589599609	0	Q04370	Q04370	Peroxisome assembly protein 12	PEX12	sp|Q04370|PEX12_YEAST Peroxisome assembly protein 12 OS=Saccharomyces cerevisiae (strain ATCC 204508 / S288c) OX=559292 GN=PEX12 PE=1 SV=1
20.85178565979	21.136209487915	22.3900547027588	NaN	21.7722129821777	NaN	-0.284424	0.821069	#VALUE!	#VALUE!	#VALUE!	#VALUE!			3	3	3	13.9	13.9	13.9	31.586	0	3.3469	24.1763034373994	3	1	2	2	0	2	0	20.5913104965419	18.1151752471924	17.0620250701904	19.1845169067383	NaN	19.103364944458	NaN	0	0.535141626993816	0	Q04396	Q04396	Lipid phosphate phosphatase 1	LPP1	sp|Q04396|LPP1_YEAST Lipid phosphate phosphatase 1 OS=Saccharomyces cerevisiae (strain ATCC 204508 / S288c) OX=559292 GN=LPP1 PE=1 SV=1
20.8971118927002	19.8335571289063	NaN	NaN	NaN	NaN	1.06355	2.09008	#VALUE!	#VALUE!	#VALUE!	#VALUE!			1	1	1	7	7	7	21.071	0	2.8549	22.7274393940581	2	1	1	0	0	0	0	19.4055112991707	19.1970539093018	16.5116291046143	NaN	NaN	NaN	NaN	0	1.06355476379395	0	Q04406	Q04406	Early meiotic induction protein 1	EMI1	sp|Q04406|EMI1_YEAST Early meiotic induction protein 1 OS=Saccharomyces cerevisiae (strain ATCC 204508 / S288c) OX=559292 GN=EMI1 PE=3 SV=1
21.7169933319092	NaN	22.0158710479736	NaN	21.5500431060791	NaN	#VALUE!	#VALUE!	#VALUE!	#VALUE!	#VALUE!	#VALUE!			1	1	1	4.3	4.3	4.3	47.578	0	5.2659	24.2860912549222	5	0	1	1	0	1	0	20.038184898312	19.090913772583	NaN	18.2989845275879	NaN	17.5790958404541	NaN	0	NaN	0	Q04429	Q04429	Protein HLR1	HLR1	sp|Q04429|HLR1_YEAST Protein HLR1 OS=Saccharomyces cerevisiae (strain ATCC 204508 / S288c) OX=559292 GN=HLR1 PE=1 SV=1
NaN	NaN	NaN	21.4616889953613	NaN	22.1808319091797	#VALUE!	#VALUE!	#VALUE!	#VALUE!	#VALUE!	#VALUE!			2	2	2	12.7	12.7	12.7	24.603	0.0081239	1.551	22.2234667653709	1	0	0	0	1	0	2	19.0535388178462	NaN	NaN	NaN	17.1397113800049	NaN	18.6085948944092	0	NaN	0	Q04477	Q04477	Kinetochore protein SPC24	SPC24	sp|Q04477|SPC24_YEAST Kinetochore protein SPC24 OS=Saccharomyces cerevisiae (strain ATCC 204508 / S288c) OX=559292 GN=SPC24 PE=1 SV=1
20.2971496582031	21.2043075561523	NaN	NaN	NaN	NaN	-0.907158	0.533235	#VALUE!	#VALUE!	#VALUE!	#VALUE!			3	3	3	7.6	7.6	7.6	76.859	0.001299	2.2349	22.6054867523535	3	2	2	0	0	0	0	17.8506263784616	17.1641807556152	16.4494228363037	NaN	NaN	NaN	NaN	0	-0.907157897949219	0	Q04511	Q04511	Ubiquitin ligase complex F-box protein UFO1	UFO1	sp|Q04511|UFO1_YEAST Ubiquitin ligase complex F-box protein UFO1 OS=Saccharomyces cerevisiae (strain ATCC 204508 / S288c) OX=559292 GN=UFO1 PE=1 SV=1
NaN	NaN	NaN	20.3294811248779	20.6603164672852	NaN	#VALUE!	#VALUE!	#VALUE!	#VALUE!	#VALUE!	#VALUE!			1	1	1	13.3	13.3	13.3	14.89	0	6.5819	21.4144684684654	2	0	0	0	1	1	0	18.8295059677442	NaN	NaN	NaN	17.0012989044189	18.3523368835449	NaN	0	0.330835342407227	0	Q04675	Q04675	tRNA-splicing endonuclease subunit SEN15	SEN15	sp|Q04675|SEN15_YEAST tRNA-splicing endonuclease subunit SEN15 OS=Saccharomyces cerevisiae (strain ATCC 204508 / S288c) OX=559292 GN=SEN15 PE=1 SV=2
23.3654632568359	NaN	NaN	NaN	NaN	NaN	#VALUE!	#VALUE!	#VALUE!	#VALUE!	#VALUE!	#VALUE!			2	2	2	20.1	20.1	20.1	26.696	0	11.423	24.9873715827866	2	0	2	0	0	0	0	21.9873542332139	21.9873542785645	NaN	NaN	NaN	NaN	NaN	0	NaN	0	Q04734	Q04734	pH-response regulator protein palI/RIM9	RIM9	sp|Q04734|PALI_YEAST pH-response regulator protein palI/RIM9 OS=Saccharomyces cerevisiae (strain ATCC 204508 / S288c) OX=559292 GN=RIM9 PE=1 SV=1
NaN	21.3174419403076	NaN	NaN	NaN	NaN	#VALUE!	#VALUE!	#VALUE!	#VALUE!	#VALUE!	#VALUE!			2	2	2	6.9	6.9	6.9	39.431	0.0095863	1.4546	21.3174413211037	2	1	0	0	0	0	1	17.1474831957582	NaN	17.1474838256836	NaN	NaN	NaN	NaN	0	NaN	0	Q04740	Q04740	Ribonuclease H	RNH1	sp|Q04740|RNH1_YEAST Ribonuclease H OS=Saccharomyces cerevisiae (strain ATCC 204508 / S288c) OX=559292 GN=RNH1 PE=1 SV=2
NaN	NaN	NaN	20.889928817749	NaN	19.8064517974854	#VALUE!	#VALUE!	#VALUE!	#VALUE!	#VALUE!	#VALUE!			2	2	2	3.3	3.3	3.3	104.75	0	2.959	20.7505826918139	3	0	0	0	1	1	1	15.0781508077346	NaN	NaN	NaN	14.4743394851685	NaN	13.5301628112793	0	NaN	0	Q04748	Q04748	Protein SOV1, mitochondrial	SOV1	sp|Q04748|SOV1_YEAST Protein SOV1, mitochondrial OS=Saccharomyces cerevisiae (strain ATCC 204508 / S288c) OX=559292 GN=SOV1 PE=1 SV=1
21.7365303039551	NaN	NaN	NaN	NaN	NaN	#VALUE!	#VALUE!	#VALUE!	#VALUE!	#VALUE!	#VALUE!			1	1	1	3.5	3.5	3.5	47.139	0.0030864	1.9514	23.3583700409376	2	0	1	0	0	0	0	19.0364419460502	19.0364418029785	NaN	NaN	NaN	NaN	NaN	0	NaN	0	Q04749	Q04749	Target of rapamycin complex 2 subunit AVO2	AVO2	sp|Q04749|AVO2_YEAST Target of rapamycin complex 2 subunit AVO2 OS=Saccharomyces cerevisiae (strain ATCC 204508 / S288c) OX=559292 GN=AVO2 PE=1 SV=1
NaN	NaN	20.9027156829834	NaN	NaN	NaN	#VALUE!	#VALUE!	#VALUE!	#VALUE!	#VALUE!	#VALUE!			2	2	2	7	7	7	46.658	0	11.249	22.5929533455039	3	0	2	1	0	0	0	18.3450326733522	17.4883270263672	NaN	17.1858234405518	NaN	NaN	NaN	0	NaN	0	Q04835	Q04835	Uncharacterized membrane protein YMR253C		sp|Q04835|YM87_YEAST Uncharacterized membrane protein YMR253C OS=Saccharomyces cerevisiae (strain ATCC 204508 / S288c) OX=559292 GN=YMR253C PE=1 SV=1
23.6097526550293	20.5151844024658	NaN	NaN	NaN	NaN	3.09457	8.54197	#VALUE!	#VALUE!	#VALUE!	#VALUE!			6	5	5	15.2	13.5	13.5	47.413	0	4.5317	25.3447902865507	4	1	5	0	0	0	0	20.8853180404423	20.862419128418	14.8986015319824	NaN	NaN	NaN	NaN	0	3.09456825256348	0	Q04925	Q04925	SVF1-like protein YDR222W	YDR222W	sp|Q04925|YDR22_YEAST SVF1-like protein YDR222W OS=Saccharomyces cerevisiae (strain ATCC 204508 / S288c) OX=559292 GN=YDR222W PE=1 SV=1
NaN	23.9967098236084	23.0060062408447	23.5999145507813	NaN	NaN	#VALUE!	#VALUE!	-0.593908	0.662546	#VALUE!	#VALUE!			2	2	2	22	22	22	24.533	0.00026123	2.3848	25.2821365350202	2	1	1	1	1	0	0	23.2822072501657	20.55055809021	21.8889999389648	21.2315158843994	21.1450099945068	NaN	NaN	0	-0.792305946350098	0	Q05015	Q05015	Family of serine hydrolases 2	FSH2	sp|Q05015|FSH2_YEAST Family of serine hydrolases 2 OS=Saccharomyces cerevisiae (strain ATCC 204508 / S288c) OX=559292 GN=FSH2 PE=1 SV=1
20.5842609405518	21.1504745483398	NaN	NaN	NaN	NaN	-0.566214	0.675387	#VALUE!	#VALUE!	#VALUE!	#VALUE!			2	2	2	5.3	5.3	5.3	67.555	0	3.7878	22.7727768773135	2	1	2	0	0	0	0	18.3133613641378	17.7466850280762	16.6909809112549	NaN	NaN	NaN	NaN	0	-0.566213607788086	0	Q05021	Q05021	Transcription initiation factor TFIID subunit 7	TAF7	sp|Q05021|TAF7_YEAST Transcription initiation factor TFIID subunit 7 OS=Saccharomyces cerevisiae (strain ATCC 204508 / S288c) OX=559292 GN=TAF7 PE=1 SV=1
NaN	22.1178798675537	NaN	22.3493270874023	NaN	21.9342346191406	#VALUE!	#VALUE!	#VALUE!	#VALUE!	#VALUE!	#VALUE!			3	3	3	13.7	13.7	13.7	26.47	0	4.6171	23.2209161534144	6	1	0	0	3	0	2	19.3140255578059	NaN	17.5894470214844	NaN	17.9415740966797	NaN	17.629768371582	0	NaN	0	Q05024	Q05024	Protein TRI1	TRI1	sp|Q05024|TRI1_YEAST Protein TRI1 OS=Saccharomyces cerevisiae (strain ATCC 204508 / S288c) OX=559292 GN=TRI1 PE=1 SV=1
NaN	NaN	22.5170364379883	23.8036098480225	23.3678646087646	NaN	#VALUE!	#VALUE!	-1.28657	0.409923	#VALUE!	#VALUE!			2	2	2	4.2	4.2	4.2	123.55	0	4.2556	24.8211881262313	2	0	0	2	1	1	0	18.8438965221251	NaN	NaN	17.1546211242676	17.2321968078613	17.3808498382568	NaN	0	-0.861159324645996	0	Q05549	Q05549	Putative ATP-dependent helicase HRQ1	HRQ1	sp|Q05549|HRQ1_YEAST ATP-dependent helicase HRQ1 OS=Saccharomyces cerevisiae (strain ATCC 204508 / S288c) OX=559292 GN=HRQ1 PE=1 SV=1
24.6306209564209	NaN	NaN	NaN	NaN	NaN	#VALUE!	#VALUE!	#VALUE!	#VALUE!	#VALUE!	#VALUE!			2	2	2	27.9	27.9	27.9	11.887	0	14.484	26.2524503309652	5	0	2	0	0	0	0	24.6674697833593	24.6674690246582	NaN	NaN	NaN	NaN	NaN	0	NaN	0	Q05637	Q05637	Phosphate metabolism protein 6	PHM6	sp|Q05637|PHM6_YEAST Phosphate metabolism protein 6 OS=Saccharomyces cerevisiae (strain ATCC 204508 / S288c) OX=559292 GN=PHM6 PE=1 SV=1
24.9362487792969	NaN	24.2843265533447	NaN	24.7930278778076	21.1494808197021	#VALUE!	#VALUE!	#VALUE!	#VALUE!	3.64355	12.4973			10	10	10	43.8	43.8	43.8	25.975	0	35.459	27.109187429646	13	0	5	7	0	7	2	23.5242049979307	22.2930850982666	NaN	21.8465919494629	NaN	21.5134506225586	17.2926635742188	0	3.52172025044759	0	Q05789	Q05789	Autophagy-related protein 38	ATG38	sp|Q05789|ATG38_YEAST Autophagy-related protein 38 OS=Saccharomyces cerevisiae (strain ATCC 204508 / S288c) OX=559292 GN=ATG38 PE=1 SV=2
24.5661029815674	NaN	NaN	NaN	21.5528583526611	NaN	#VALUE!	#VALUE!	#VALUE!	#VALUE!	#VALUE!	#VALUE!			5	5	5	16.8	16.8	16.8	47.355	0	11.924	26.2585372809121	6	0	4	0	0	2	0	21.9366091860247	21.869327545166	NaN	NaN	NaN	17.4808540344238	NaN	0	NaN	0	Q05790	Q05790	Probable glycosidase CRR1	CRR1	sp|Q05790|CRR1_YEAST Probable glycosidase CRR1 OS=Saccharomyces cerevisiae (strain ATCC 204508 / S288c) OX=559292 GN=CRR1 PE=2 SV=1
22.2183322906494	23.5749626159668	NaN	23.3168621063232	NaN	23.2445678710938	-1.35663	0.390493	#VALUE!	#VALUE!	#VALUE!	#VALUE!			3	3	3	10.8	10.8	10.8	41.851	0	5.3553	25.0928113276667	8	2	2	0	3	0	3	20.7004939048879	18.9789943695068	18.710147857666	NaN	18.2728023529053	NaN	18.7528057098389	0	-1.16046524047852	0	Q05791	Q05791	Cell division cycle protein 123	CDC123	sp|Q05791|CD123_YEAST Cell division cycle protein 123 OS=Saccharomyces cerevisiae (strain ATCC 204508 / S288c) OX=559292 GN=CDC123 PE=1 SV=1
NaN	NaN	21.2141857147217	22.1149272918701	NaN	22.3521595001221	#VALUE!	#VALUE!	-0.900742	0.535611	#VALUE!	#VALUE!			1	1	1	21.9	21.9	21.9	11.239	0	10.131	23.2172223130869	2	0	0	1	1	0	1	20.6322746065826	NaN	NaN	19.1602458953857	18.7868251800537	NaN	19.1633453369141	0	-1.01935768127441	0	Q05809	Q05809	Cytochrome oxidase assembly factor 4	COA4	sp|Q05809|COA4_YEAST Cytochrome oxidase assembly factor 4 OS=Saccharomyces cerevisiae (strain ATCC 204508 / S288c) OX=559292 GN=COA4 PE=1 SV=2
NaN	NaN	20.4351215362549	NaN	20.1223735809326	NaN	#VALUE!	#VALUE!	#VALUE!	#VALUE!	#VALUE!	#VALUE!			1	1	1	1.9	1.9	1.9	151.28	0	7.8427	21.710449966087	1	0	0	1	0	1	0	15.9825257277866	NaN	NaN	15.2382555007935	NaN	14.6714859008789	NaN	0	NaN	0	Q05854	Q05854	Uncharacterized transcriptional regulatory protein YLR278C		sp|Q05854|YL278_YEAST Uncharacterized transcriptional regulatory protein YLR278C OS=Saccharomyces cerevisiae (strain ATCC 204508 / S288c) OX=559292 GN=YLR278C PE=1 SV=1
NaN	NaN	NaN	22.917179107666	NaN	22.3457584381104	#VALUE!	#VALUE!	#VALUE!	#VALUE!	#VALUE!	#VALUE!			3	3	3	24.2	24.2	24.2	36.574	0	9.6111	23.8022291960035	6	0	0	1	2	1	2	19.5542740671321	NaN	NaN	17.3587036132813	17.9608726501465	17.3646984100342	17.4407062530518	0	NaN	0	Q05867	Q05867	Uncharacterized protein YLR283W, mitochondrial	YLR283W	sp|Q05867|YL283_YEAST Uncharacterized protein YLR283W, mitochondrial OS=Saccharomyces cerevisiae (strain ATCC 204508 / S288c) OX=559292 GN=YLR283W PE=1 SV=1
26.3362846374512	NaN	NaN	NaN	NaN	NaN	#VALUE!	#VALUE!	#VALUE!	#VALUE!	#VALUE!	#VALUE!			4	4	4	33.3	33.3	33.3	13.947	0	48.737	27.9581473394519	6	0	4	0	0	0	0	25.3731848387307	25.3731842041016	NaN	NaN	NaN	NaN	NaN	0	NaN	0	Q05899	Q05899	Uncharacterized vacuolar protein YLR297W	YLR297W	sp|Q05899|YL297_YEAST Uncharacterized vacuolar protein YLR297W OS=Saccharomyces cerevisiae (strain ATCC 204508 / S288c) OX=559292 GN=YLR297W PE=1 SV=1
NaN	NaN	NaN	NaN	23.7535839080811	NaN	#VALUE!	#VALUE!	#VALUE!	#VALUE!	#VALUE!	#VALUE!			4	4	4	18.9	18.9	18.9	32.59	0	5.7714	26.834727380444	2	1	3	1	0	2	1	23.5127992855567	21.7024402618408	18.3521633148193	22.5798034667969	NaN	20.708683013916	17.8679180145264	0	NaN	0	Q06058	Q06058	Seipin FLD1	FLD1	sp|Q06058|SEI1_YEAST Seipin OS=Saccharomyces cerevisiae (strain ATCC 204508 / S288c) OX=559292 GN=SEI1 PE=1 SV=1
22.42746925354	NaN	23.2688522338867	NaN	22.7068500518799	NaN	#VALUE!	#VALUE!	#VALUE!	#VALUE!	#VALUE!	#VALUE!			1	1	1	3.5	3.5	3.5	41.696	0.0010422	2.3211	25.4575121416114	5	0	1	1	1	1	0	21.2095533166239	20.1703548431396	NaN	19.6841125488281	NaN	18.6193466186523	NaN	0	NaN	0	Q06063	Q06063	tRNA-dihydrouridine(20a/20b) synthase [NAD(P)+]	DUS4	sp|Q06063|DUS4_YEAST tRNA-dihydrouridine(20a/20b) synthase [NAD(P)+] OS=Saccharomyces cerevisiae (strain ATCC 204508 / S288c) OX=559292 GN=DUS4 PE=1 SV=1
NaN	NaN	23.4234218597412	21.8377285003662	25.01051902771	NaN	#VALUE!	#VALUE!	1.58569	3.00152	#VALUE!	#VALUE!			2	2	2	19.7	19.7	19.7	14.549	0	5.8329	26.0472053067032	8	0	0	2	1	2	0	23.047201145537	NaN	NaN	21.6628379821777	16.5283164978027	22.3247108459473	NaN	0	2.37924194335938	0	Q06071	Q06071	Biogenesis of lysosome-related organelles complex 1 subunit BLS1	BLS1	sp|Q06071|BL1S1_YEAST Biogenesis of lysosome-related organelles complex 1 subunit BLS1 OS=Saccharomyces cerevisiae (strain ATCC 204508 / S288c) OX=559292 GN=BLS1 PE=1 SV=1
23.1695919036865	23.3841648101807	NaN	NaN	NaN	NaN	-0.214573	0.861801	#VALUE!	#VALUE!	#VALUE!	#VALUE!			3	3	3	14.3	14.3	14.3	17.731	0	8.1397	25.1816964122161	6	2	2	0	0	1	0	23.1816964122161	22.6420936584473	21.5014972686768	NaN	NaN	NaN	NaN	0	-0.214572906494141	0	Q06089	Q06089	Uncharacterized mitochondrial outer membrane protein YPR098C	YPR098C	sp|Q06089|YP098_YEAST Uncharacterized mitochondrial outer membrane protein YPR098C OS=Saccharomyces cerevisiae (strain ATCC 204508 / S288c) OX=559292 GN=YPR098C PE=1 SV=2
20.6046733856201	NaN	20.9448528289795	NaN	21.4200325012207	NaN	#VALUE!	#VALUE!	#VALUE!	#VALUE!	#VALUE!	#VALUE!			2	2	2	10.5	10.5	10.5	32.71	0	10.646	23.420083578282	4	0	2	1	0	1	0	20.2501457231203	19.0565853118896	NaN	18.3059902191162	NaN	18.5270729064941	NaN	0	NaN	0	Q06104	Q06104	Uncharacterized membrane protein YPR109W	YPR109W	sp|Q06104|GLD1_YEAST Golgi/endosome-localized DSC protein 1 OS=Saccharomyces cerevisiae (strain ATCC 204508 / S288c) OX=559292 GN=GLD1 PE=1 SV=1
NaN	NaN	21.9647617340088	NaN	22.1643218994141	21.8821125030518	#VALUE!	#VALUE!	#VALUE!	#VALUE!	0.282209	1.21606			4	4	4	1.4	1.4	1.4	285.9	0.0093482	1.4815	26.3991578176762	6	2	2	1	0	1	1	19.3011299731834	18.3904972076416	17.6026992797852	15.3977746963501	NaN	15.3432550430298	14.1802196502686	0	0.182429313659668	0	Q06116	Q06116	Uncharacterized protein YPR117W	YPR117W	sp|Q06116|YP117_YEAST Uncharacterized protein YPR117W OS=Saccharomyces cerevisiae (strain ATCC 204508 / S288c) OX=559292 GN=YPR117W PE=1 SV=1
NaN	NaN	NaN	21.5041675567627	NaN	20.897777557373	#VALUE!	#VALUE!	#VALUE!	#VALUE!	#VALUE!	#VALUE!			3	3	3	7.7	7.7	7.7	58.385	0.0023196	2.0138	22.5846285864287	3	2	0	0	1	0	1	17.8297227350861	NaN	16.8671340942383	NaN	16.0061283111572	NaN	15.5390682220459	0	NaN	0	Q06137	Q06137	Putative 6-phosphofructo-2-kinase/fructose-2,6-bisphosphatase YLR345W;6-phosphofructo-2-kinase;Fructose-2,6-bisphosphatase	YLR345W	sp|Q06137|YL345_YEAST Putative 6-phosphofructo-2-kinase/fructose-2,6-bisphosphatase YLR345W OS=Saccharomyces cerevisiae (strain ATCC 204508 / S288c) OX=559292 GN=YLR345W PE=1 SV=1
24.4198913574219	22.9030284881592	NaN	NaN	21.0820636749268	NaN	1.51686	2.86168	#VALUE!	#VALUE!	#VALUE!	#VALUE!			9	9	9	14.6	14.6	14.6	77.565	0	5.9761	26.1992728966894	10	4	7	0	1	2	0	21.0699898797444	20.7573547363281	17.9968376159668	NaN	15.7906541824341	16.7556438446045	NaN	0	-0.152050971984863	0	Q06147	Q06147	Sphingoid long chain base kinase 5	LCB5	sp|Q06147|LCB5_YEAST Sphingoid long chain base kinase 5 OS=Saccharomyces cerevisiae (strain ATCC 204508 / S288c) OX=559292 GN=LCB5 PE=1 SV=1
NaN	NaN	NaN	21.5286464691162	NaN	21.3987445831299	#VALUE!	#VALUE!	#VALUE!	#VALUE!	#VALUE!	#VALUE!			2	2	2	21.6	21.6	21.6	17.862	0	3.8617	23.4469530299611	4	0	0	1	1	1	1	20.2770784935755	NaN	NaN	19.004674911499	17.6156158447266	18.3821182250977	17.6249961853027	0	NaN	0	Q06162	Q06162	Central kinetochore subunit NKP2	NKP2	sp|Q06162|NKP2_YEAST Inner kinetochore subunit NKP2 OS=Saccharomyces cerevisiae (strain ATCC 204508 / S288c) OX=559292 GN=NKP2 PE=1 SV=1
26.6401691436768	22.6906185150146	24.8604125976563	NaN	25.1961803436279	NaN	3.94955	15.4502	#VALUE!	#VALUE!	#VALUE!	#VALUE!			7	7	7	30.8	30.8	30.8	27.423	0	39.515	28.5002087647434	15	2	6	2	0	3	0	25.3302609645267	24.7319507598877	18.139310836792	22.6783103942871	NaN	22.8035507202148	NaN	0	2.874968846639	0	Q06170	Q06170	Uncharacterized membrane protein YLR326W	YLR326W	sp|Q06170|YL326_YEAST Uncharacterized membrane protein YLR326W OS=Saccharomyces cerevisiae (strain ATCC 204508 / S288c) OX=559292 GN=YLR326W PE=1 SV=1
20.6770210266113	NaN	NaN	NaN	NaN	NaN	#VALUE!	#VALUE!	#VALUE!	#VALUE!	#VALUE!	#VALUE!			1	1	1	2.5	2.5	2.5	50.327	0.0081487	1.6088	22.2988837154765	1	0	1	0	0	0	0	18.2114320582988	18.2114315032959	NaN	NaN	NaN	NaN	NaN	0	NaN	0	Q06200	Q06200	Protein ECM7	ECM7	sp|Q06200|ECM7_YEAST Protein ECM7 OS=Saccharomyces cerevisiae (strain ATCC 204508 / S288c) OX=559292 GN=ECM7 PE=1 SV=1
NaN	NaN	21.4542770385742	21.5973243713379	NaN	21.4697589874268	#VALUE!	#VALUE!	-0.143047	0.905604	#VALUE!	#VALUE!			2	2	2	16.6	16.6	16.6	17.908	0.0038511	1.9044	23.2853152900379	4	0	0	2	1	0	1	20.2853435142564	NaN	NaN	19.9582977294922	16.9779052734375	NaN	16.9895935058594	0	-0.0792646408081055	0	Q06213	Q06213	Mediator of RNA polymerase II transcription subunit 10	NUT2	sp|Q06213|MED10_YEAST Mediator of RNA polymerase II transcription subunit 10 OS=Saccharomyces cerevisiae (strain ATCC 204508 / S288c) OX=559292 GN=NUT2 PE=1 SV=1
NaN	NaN	21.3178272247314	NaN	21.0175361633301	NaN	#VALUE!	#VALUE!	#VALUE!	#VALUE!	#VALUE!	#VALUE!			3	3	3	5.7	5.7	5.7	112.5	0	3.099	23.0754517289129	4	1	0	2	2	1	0	17.1927744030992	NaN	14.9443922042847	15.9662580490112	13.381272315979	15.4118089675903	NaN	0	NaN	0	Q06337	Q06337	Chromatin modification-related protein EAF1	EAF1	sp|Q06337|EAF1_YEAST Chromatin modification-related protein EAF1 OS=Saccharomyces cerevisiae (strain ATCC 204508 / S288c) OX=559292 GN=EAF1 PE=1 SV=2
NaN	NaN	22.0413303375244	NaN	22.5157127380371	22.8178844451904	#VALUE!	#VALUE!	#VALUE!	#VALUE!	-0.302172	0.811031			3	3	3	9.1	9.1	9.1	48.656	0	12.866	24.3503656979644	6	0	0	3	0	3	1	19.4434818473728	NaN	NaN	18.6087741851807	NaN	17.8355331420898	16.2750873565674	0	-0.539362907409668	0	Q06410	Q06410	Autophagy-related protein 17	ATG17	sp|Q06410|ATG17_YEAST Autophagy-related protein 17 OS=Saccharomyces cerevisiae (strain ATCC 204508 / S288c) OX=559292 GN=ATG17 PE=1 SV=1
22.6046943664551	NaN	23.1087207794189	NaN	23.5489845275879	NaN	#VALUE!	#VALUE!	#VALUE!	#VALUE!	#VALUE!	#VALUE!			2	2	2	8	8	8	36.677	0	6.9285	25.2731985786541	4	0	1	2	0	2	0	21.0252639495577	18.5551738739014	NaN	19.6675415039063	NaN	19.8054141998291	NaN	0	NaN	0	Q06417	Q06417	Uncharacterized oxidoreductase TDA5	TDA5	sp|Q06417|TDA5_YEAST Uncharacterized oxidoreductase TDA5 OS=Saccharomyces cerevisiae (strain ATCC 204508 / S288c) OX=559292 GN=TDA5 PE=1 SV=1
NaN	20.2366638183594	20.9761734008789	21.9824886322021	NaN	21.9393749237061	#VALUE!	#VALUE!	-1.00632	0.497816	#VALUE!	#VALUE!			2	2	2	5.5	5.5	5.5	93.122	0.0018097	2.1005	23.0451690630561	2	1	0	1	2	0	1	17.652844973002	NaN	14.8176832199097	15.4815158843994	16.3226509094238	NaN	15.5949077606201	0	-0.410002390543621	0	Q06479	Q06479	F-box protein YLR352W	YLR352W	sp|Q06479|YL352_YEAST F-box protein YLR352W OS=Saccharomyces cerevisiae (strain ATCC 204508 / S288c) OX=559292 GN=YLR352W PE=1 SV=1
23.3134059906006	23.1645660400391	NaN	NaN	NaN	NaN	0.14884	1.10868	#VALUE!	#VALUE!	#VALUE!	#VALUE!			3	3	3	12.9	12.9	12.9	30.653	0	6.7027	25.2025085838464	5	3	3	0	0	0	0	22.0326134739913	21.5600624084473	20.1925582885742	NaN	NaN	NaN	NaN	0	0.148839950561523	0	Q06543	Q06543	GPN-loop GTPase 3	GPN3	sp|Q06543|GPN3_YEAST GPN-loop GTPase 3 OS=Saccharomyces cerevisiae (strain ATCC 204508 / S288c) OX=559292 GN=GPN3 PE=1 SV=1
23.7185821533203	NaN	NaN	NaN	NaN	NaN	#VALUE!	#VALUE!	#VALUE!	#VALUE!	#VALUE!	#VALUE!			4	4	4	15.3	15.3	15.3	41.098	0	8.0809	25.3404502290993	4	0	4	0	0	0	0	21.2529772004877	21.2529773712158	NaN	NaN	NaN	NaN	NaN	0	NaN	0	Q06551	Q06551	Palmitoyltransferase ERF2	ERF2	sp|Q06551|ERFB_YEAST Palmitoyltransferase ERF2 OS=Saccharomyces cerevisiae (strain ATCC 204508 / S288c) OX=559292 GN=ERF2 PE=1 SV=1
20.5782833099365	23.108434677124	NaN	21.0426006317139	NaN	21.9767665863037	-2.53015	0.173121	#VALUE!	#VALUE!	#VALUE!	#VALUE!			7	7	7	17.7	17.7	17.7	75.462	0	7.1761	24.3490160603329	10	5	2	0	3	1	1	19.1791072620291	17.2186393737793	18.2741241455078	NaN	14.2145471572876	15.832667350769	15.5108880996704	0	-1.46431732177734	0	Q06623	Q06623	HDA1 complex subunit 3	HDA3	sp|Q06623|HDA3_YEAST HDA1 complex subunit 3 OS=Saccharomyces cerevisiae (strain ATCC 204508 / S288c) OX=559292 GN=HDA3 PE=1 SV=1
22.1501026153564	NaN	22.8454437255859	20.7642555236816	22.7794456481934	NaN	#VALUE!	#VALUE!	2.08119	4.23156	#VALUE!	#VALUE!			3	3	3	10.1	10.1	10.1	32.675	0	9.9828	24.9606238419847	8	0	2	3	1	2	0	20.9606326790226	19.1620674133301	NaN	19.5801811218262	15.4111795425415	19.25732421875	NaN	0	1.82740847269694	0	Q06651	Q06651	E3 ubiquitin-protein ligase PIB1	PIB1	sp|Q06651|PIB1_YEAST E3 ubiquitin-protein ligase PIB1 OS=Saccharomyces cerevisiae (strain ATCC 204508 / S288c) OX=559292 GN=PIB1 PE=1 SV=1
20.1157855987549	21.6630554199219	NaN	NaN	NaN	NaN	-1.54727	0.342157	#VALUE!	#VALUE!	#VALUE!	#VALUE!			2	2	2	8.8	8.8	8.8	31.707	0.0068895	1.7121	22.7008325259529	3	2	1	0	0	0	0	19.000390691677	18.0371932983398	17.96262550354	NaN	NaN	NaN	NaN	0	-1.54726982116699	0	Q06688	Q06688	SRR1-like protein BER1	BER1	sp|Q06688|SRR1L_YEAST SRR1-like protein BER1 OS=Saccharomyces cerevisiae (strain ATCC 204508 / S288c) OX=559292 GN=BER1 PE=1 SV=1
22.2896842956543	22.0051498413086	NaN	NaN	NaN	21.9598197937012	0.284534	1.21802	#VALUE!	#VALUE!	#VALUE!	#VALUE!			4	4	4	14	14	14	64.017	0	6.6819	24.9382705271931	5	1	3	1	0	1	2	19.9841235787583	19.3126964569092	16.4744510650635	16.8134059906006	NaN	16.5208187103271	16.3856601715088	0	0.307199478149414	0	Q06696	Q06696	Vacuolar protein-sorting-associated protein 36	VPS36	sp|Q06696|VPS36_YEAST Vacuolar protein-sorting-associated protein 36 OS=Saccharomyces cerevisiae (strain ATCC 204508 / S288c) OX=559292 GN=VPS36 PE=1 SV=1
NaN	NaN	NaN	NaN	19.6811637878418	NaN	#VALUE!	#VALUE!	#VALUE!	#VALUE!	#VALUE!	#VALUE!			2	2	2	7.8	7.8	7.8	64.958	0	5.7783	23.0991512984541	2	0	1	0	0	1	0	18.5755909479953	18.4019966125488	NaN	NaN	NaN	15.4345626831055	NaN	0	NaN	0	Q06820	Q06820	Mitochondrial distribution and morphology protein 36	MDM36	sp|Q06820|MDM36_YEAST Mitochondrial distribution and morphology protein 36 OS=Saccharomyces cerevisiae (strain ATCC 204508 / S288c) OX=559292 GN=MDM36 PE=1 SV=1
NaN	NaN	23.8690071105957	NaN	24.0495128631592	NaN	#VALUE!	#VALUE!	#VALUE!	#VALUE!	#VALUE!	#VALUE!			4	4	4	5.5	5.5	5.5	137.58	0	10.065	25.4434477004003	6	0	1	3	0	3	0	19.743006717541	15.7029571533203	NaN	18.5638732910156	NaN	18.7360515594482	NaN	0	NaN	0	Q06836	Q06836	Arf guanine nucleotide exchange factor SYT1	SYT1	sp|Q06836|SYT1_YEAST Arf guanine nucleotide exchange factor SYT1 OS=Saccharomyces cerevisiae (strain ATCC 204508 / S288c) OX=559292 GN=SYT1 PE=1 SV=1
27.3934574127197	NaN	27.6956443786621	NaN	27.4032440185547	21.0159721374512	#VALUE!	#VALUE!	#VALUE!	#VALUE!	6.38727	83.7067			7	7	7	14.8	14.8	14.8	53.565	0	67.091	29.8334310365071	35	0	6	6	0	6	2	25.9265329006083	24.3938827514648	NaN	24.6392040252686	NaN	23.8824100494385	17.0913524627686	0	6.481476465861	0	Q07376	Q07376	Probable transporter MCH1	MCH1	sp|Q07376|MCH1_YEAST Probable transporter MCH1 OS=Saccharomyces cerevisiae (strain ATCC 204508 / S288c) OX=559292 GN=MCH1 PE=1 SV=1
NaN	NaN	23.0639476776123	23.2952995300293	23.3361988067627	NaN	#VALUE!	#VALUE!	-0.231352	0.851836	#VALUE!	#VALUE!			3	3	3	3.5	3.5	3.5	113.89	0.0038501	1.9039	25.8255374387913	4	2	0	1	1	1	1	20.1251510944058	NaN	18.9968376159668	17.8945693969727	16.8517246246338	17.912748336792	13.5170545578003	0	-0.0952262878417969	0	Q07454	Q07454	UPF0592 protein YDL073W	YDL073W	sp|Q07454|YD073_YEAST UPF0592 protein YDL073W OS=Saccharomyces cerevisiae (strain ATCC 204508 / S288c) OX=559292 GN=YDL073W PE=1 SV=1
21.9840183258057	22.5855922698975	NaN	22.7068729400635	NaN	22.4825191497803	-0.601574	0.659035	#VALUE!	#VALUE!	#VALUE!	#VALUE!			2	2	2	9.9	9.9	9.9	40.64	0	10.765	24.6286195261123	7	1	1	0	1	0	2	20.6286306498216	19.4679794311523	18.450647354126	NaN	17.8205909729004	NaN	18.2243976593018	0	-0.607643127441406	0	Q07532	Q07532	RNA polymerase II nuclear localization protein IWR1	IWR1	sp|Q07532|IWR1_YEAST RNA polymerase II nuclear localization protein IWR1 OS=Saccharomyces cerevisiae (strain ATCC 204508 / S288c) OX=559292 GN=IWR1 PE=1 SV=2
28.0351715087891	23.0584754943848	28.0872974395752	NaN	28.6262741088867	NaN	4.9767	31.4873	#VALUE!	#VALUE!	#VALUE!	#VALUE!			3	3	3	35	35	35	15.673	0	57.806	30.7348924883657	26	1	3	3	0	3	0	28.149962280401	27.0969772338867	20.4336948394775	26.054386138916	NaN	26.3098030090332	NaN	0	5.19110552469889	0	Q07549	Q07549	Protein SNA4	SNA4	sp|Q07549|SNA4_YEAST Protein SNA4 OS=Saccharomyces cerevisiae (strain ATCC 204508 / S288c) OX=559292 GN=SNA4 PE=1 SV=1
21.9952449798584	NaN	23.0230140686035	NaN	23.2622699737549	NaN	#VALUE!	#VALUE!	#VALUE!	#VALUE!	#VALUE!	#VALUE!			7	7	7	17.2	17.2	17.2	69.37	0	17.308	25.1335944139335	14	0	3	4	0	5	0	20.0892590829062	18.5146446228027	NaN	18.3118991851807	NaN	18.6645927429199	NaN	0	NaN	0	Q07622	Q07622	Activator of C kinase protein 1	ACK1	sp|Q07622|ACK1_YEAST Activator of C kinase protein 1 OS=Saccharomyces cerevisiae (strain ATCC 204508 / S288c) OX=559292 GN=ACK1 PE=1 SV=1
NaN	NaN	18.7395820617676	19.5052337646484	19.4783668518066	NaN	#VALUE!	#VALUE!	-0.765652	0.588188	#VALUE!	#VALUE!			3	3	3	4.9	4.9	4.9	113.61	0.0010409	2.2746	21.1134344171502	3	0	0	2	1	2	0	15.1134573098241	NaN	NaN	14.2646627426147	11.9012441635132	13.5436363220215	NaN	0	-0.396259307861328	0	Q07653	Q07653	Protein HBT1	HBT1	sp|Q07653|HBT1_YEAST Protein HBT1 OS=Saccharomyces cerevisiae (strain ATCC 204508 / S288c) OX=559292 GN=HBT1 PE=1 SV=1
25.9150409698486	NaN	NaN	NaN	NaN	NaN	#VALUE!	#VALUE!	#VALUE!	#VALUE!	#VALUE!	#VALUE!			9	4	4	23.2	11.5	11.5	45.679	0	5.7477	27.5368999211085	3	0	4	0	0	0	0	23.4494741228541	23.4494743347168	NaN	NaN	NaN	NaN	NaN	0	NaN	0	Q07788	Q07788	Protein COS7	COS7	sp|Q07788|COS7_YEAST Protein COS7 OS=Saccharomyces cerevisiae (strain ATCC 204508 / S288c) OX=559292 GN=COS7 PE=1 SV=1
NaN	NaN	19.4093494415283	20.507848739624	NaN	20.2837619781494	#VALUE!	#VALUE!	-1.0985	0.467002	#VALUE!	#VALUE!			1	1	1	3	3	3	50.095	0	3.275	21.3841112922478	2	0	0	1	1	0	1	17.1362101349346	NaN	NaN	15.692479133606	15.5168085098267	NaN	15.4320526123047	0	-0.986455917358398	0	Q07794	Q07794	Histone acetyltransferase RTT109	RTT109	sp|Q07794|RT109_YEAST Histone acetyltransferase RTT109 OS=Saccharomyces cerevisiae (strain ATCC 204508 / S288c) OX=559292 GN=RTT109 PE=1 SV=1
22.440149307251	22.000617980957	NaN	NaN	NaN	NaN	0.439531	1.35616	#VALUE!	#VALUE!	#VALUE!	#VALUE!			5	5	5	9.3	9.3	9.3	72.257	0	5.1965	24.7310185763998	6	2	4	0	1	1	1	19.9236553650518	19.620885848999	16.4756393432617	NaN	14.5063076019287	15.1495485305786	15.1952953338623	0	0.439531326293945	0	Q07845	Q07845	Polynucleotide 5-hydroxyl-kinase GRC3	GRC3	sp|Q07845|GRC3_YEAST Polynucleotide 5-hydroxyl-kinase GRC3 OS=Saccharomyces cerevisiae (strain ATCC 204508 / S288c) OX=559292 GN=GRC3 PE=1 SV=1
NaN	NaN	NaN	NaN	NaN	20.5702457427979	#VALUE!	#VALUE!	#VALUE!	#VALUE!	#VALUE!	#VALUE!			1	1	1	6.3	6.3	6.3	21.28	0	3.3331	19.9664885536733	1	0	0	0	0	0	1	16.644560458786	NaN	NaN	NaN	NaN	NaN	16.6445598602295	0	NaN	0	Q07923	Q07923	NAD(P)H-dependent FMN reductase LOT6	LOT6	sp|Q07923|LOT6_YEAST NAD(P)H-dependent FMN reductase LOT6 OS=Saccharomyces cerevisiae (strain ATCC 204508 / S288c) OX=559292 GN=LOT6 PE=1 SV=1
NaN	NaN	20.2982692718506	23.491060256958	NaN	21.9265823364258	#VALUE!	#VALUE!	-3.19279	0.109364	#VALUE!	#VALUE!			2	2	2	14.5	14.5	14.5	20.06	0	3.8904	23.7358286849589	5	0	0	1	2	0	2	20.5658830291806	NaN	NaN	17.0720062255859	20.0928764343262	NaN	18.1758708953857	0	-2.41055202484131	0	Q07951	Q07951	Proteasome chaperone 3	IRC25	sp|Q07951|POC3_YEAST Proteasome chaperone 3 OS=Saccharomyces cerevisiae (strain ATCC 204508 / S288c) OX=559292 GN=IRC25 PE=1 SV=1
22.0184879302979	NaN	NaN	NaN	NaN	NaN	#VALUE!	#VALUE!	#VALUE!	#VALUE!	#VALUE!	#VALUE!			2	2	2	11.8	11.8	11.8	23.378	0.00026337	2.6214	23.6403076106838	2	0	2	0	0	0	0	20.4704046770656	20.4704055786133	NaN	NaN	NaN	NaN	NaN	0	NaN	0	Q07986	Q07986	Uncharacterized protein YLR036C	YLR036C	sp|Q07986|YL036_YEAST Uncharacterized protein YLR036C OS=Saccharomyces cerevisiae (strain ATCC 204508 / S288c) OX=559292 GN=YLR036C PE=1 SV=1
20.1057186126709	NaN	NaN	NaN	NaN	NaN	#VALUE!	#VALUE!	#VALUE!	#VALUE!	#VALUE!	#VALUE!			1	1	1	5.8	5.8	5.8	24.462	0.00026302	2.5992	21.7275848092261	1	0	1	0	0	0	0	19.1426056903704	19.1426048278809	NaN	NaN	NaN	NaN	NaN	0	NaN	0	Q07988	Q07988	Cell wall protein YLR040C	YLR040C	sp|Q07988|AFB1_YEAST A-factor barrier protein 1 OS=Saccharomyces cerevisiae (strain ATCC 204508 / S288c) OX=559292 GN=AFB1 PE=2 SV=1
25.4079818725586	NaN	NaN	NaN	NaN	NaN	#VALUE!	#VALUE!	#VALUE!	#VALUE!	#VALUE!	#VALUE!			7	7	7	11.1	11.1	11.1	75.076	0	12.948	27.0298112493278	9	0	6	0	0	1	0	22.3293989065444	22.3293991088867	NaN	NaN	NaN	NaN	NaN	0	NaN	0	Q08108	Q08108	Lysophospholipase 3	PLB3	sp|Q08108|PLB3_YEAST Lysophospholipase 3 OS=Saccharomyces cerevisiae (strain ATCC 204508 / S288c) OX=559292 GN=PLB3 PE=3 SV=1
NaN	NaN	NaN	22.0942306518555	NaN	21.0189628601074	#VALUE!	#VALUE!	#VALUE!	#VALUE!	#VALUE!	#VALUE!			2	2	2	13	13	13	27.166	0.0038491	1.8982	21.9877705653836	3	0	0	0	1	0	2	18.5283320088612	NaN	NaN	NaN	17.3434295654297	NaN	17.6922073364258	0	NaN	0	Q08202	Q08202	Protein OPI10	OPI10	sp|Q08202|OPI10_YEAST Protein OPI10 OS=Saccharomyces cerevisiae (strain ATCC 204508 / S288c) OX=559292 GN=OPI10 PE=1 SV=1
NaN	NaN	21.258508682251	NaN	21.2765674591064	NaN	#VALUE!	#VALUE!	#VALUE!	#VALUE!	#VALUE!	#VALUE!			4	4	4	4.2	4.2	4.2	126.04	0	7.0104	24.7983282161574	9	1	1	2	1	2	0	18.9654742973488	18.2932472229004	14.128960609436	15.9566707611084	15.7509689331055	15.7206182479858	NaN	0	NaN	0	Q08204	Q08204	Structural maintenance of chromosomes protein 5	SMC5	sp|Q08204|SMC5_YEAST Structural maintenance of chromosomes protein 5 OS=Saccharomyces cerevisiae (strain ATCC 204508 / S288c) OX=559292 GN=SMC5 PE=1 SV=1
22.280366897583	NaN	23.9731616973877	NaN	23.8134288787842	NaN	#VALUE!	#VALUE!	#VALUE!	#VALUE!	#VALUE!	#VALUE!			2	2	2	9.7	9.7	9.7	84.351	0	5.3465	25.6969441861349	7	0	1	2	0	2	0	20.5269767471808	18.1494693756104	NaN	19.4134464263916	NaN	18.9934139251709	NaN	0	NaN	0	Q08206	Q08206	Uncharacterized protein YOL036W	YOL036W	sp|Q08206|YO036_YEAST Uncharacterized protein YOL036W OS=Saccharomyces cerevisiae (strain ATCC 204508 / S288c) OX=559292 GN=YOL036W PE=1 SV=1
NaN	NaN	23.9080238342285	NaN	23.7983779907227	NaN	#VALUE!	#VALUE!	#VALUE!	#VALUE!	#VALUE!	#VALUE!			4	4	4	17	17	17	43.676	0	10.129	25.2808630693267	6	0	0	4	0	3	0	21.0329497116792	NaN	NaN	20.3203639984131	NaN	19.673677444458	NaN	0	NaN	0	Q08215	Q08215	Peroxisomal membrane protein PEX15	PEX15	sp|Q08215|PEX15_YEAST Peroxisomal membrane protein PEX15 OS=Saccharomyces cerevisiae (strain ATCC 204508 / S288c) OX=559292 GN=PEX15 PE=1 SV=1
NaN	NaN	NaN	NaN	20.3822650909424	NaN	#VALUE!	#VALUE!	#VALUE!	#VALUE!	#VALUE!	#VALUE!			1	1	1	2.9	2.9	2.9	109.71	0.008128	1.5696	20.6591841202651	2	0	0	0	0	1	0	15.3738167507927	NaN	NaN	NaN	NaN	15.3738164901733	NaN	0	NaN	0	Q08226	Q08226	Protein CRT10	CRT10	sp|Q08226|CRT10_YEAST Protein CRT10 OS=Saccharomyces cerevisiae (strain ATCC 204508 / S288c) OX=559292 GN=CRT10 PE=1 SV=1
NaN	NaN	20.7657947540283	20.5102653503418	20.87184715271	NaN	#VALUE!	#VALUE!	0.255529	1.19377	#VALUE!	#VALUE!			2	2	2	13	13	13	19.042	0	9.8308	24.4448698066202	5	1	1	2	1	2	1	21.1229417117328	19.9635276794434	18.4288997650146	17.9456958770752	16.245943069458	17.9890956878662	18.278621673584	0	0.308555603027344	0	Q08230	Q08230	Succinate dehydrogenase assembly factor 2, mitochondrial	SDH5	sp|Q08230|SDHF2_YEAST Succinate dehydrogenase assembly factor 2, mitochondrial OS=Saccharomyces cerevisiae (strain ATCC 204508 / S288c) OX=559292 GN=SDH5 PE=1 SV=1
21.8632507324219	NaN	22.0390892028809	NaN	21.9053993225098	NaN	#VALUE!	#VALUE!	#VALUE!	#VALUE!	#VALUE!	#VALUE!			3	3	3	13.6	13.6	13.6	52.677	0	9.8796	24.4630124153042	7	0	2	3	0	3	0	19.8191718214739	18.9767322540283	NaN	17.4093914031982	NaN	17.8427314758301	NaN	0	NaN	0	Q08231	Q08231	Nuclear mRNA export protein THP1	THP1	sp|Q08231|THP1_YEAST Nuclear mRNA export protein THP1 OS=Saccharomyces cerevisiae (strain ATCC 204508 / S288c) OX=559292 GN=THP1 PE=1 SV=1
23.4691123962402	20.6009578704834	NaN	NaN	NaN	18.054838180542	2.86815	7.30131	#VALUE!	#VALUE!	#VALUE!	#VALUE!			6	6	6	3.9	3.9	3.9	145.07	0	7.0597	24.943645534339	7	4	6	0	0	0	1	19.1107483668141	18.9012432098389	16.194429397583	NaN	NaN	NaN	10.5797872543335	0	4.14121437072754	0	Q08234	Q08234	Uncharacterized ABC transporter ATP-binding protein/permease YOL075C		sp|Q08234|YO075_YEAST Uncharacterized ABC transporter ATP-binding protein/permease YOL075C OS=Saccharomyces cerevisiae (strain ATCC 204508 / S288c) OX=559292 GN=YOL075C PE=1 SV=3
23.5720729827881	NaN	24.0096664428711	NaN	23.6522846221924	23.7477588653564	#VALUE!	#VALUE!	#VALUE!	#VALUE!	-0.0954742	0.935965			11	11	11	12.1	12.1	12.1	131.38	0	15.717	26.5016367696811	18	0	6	7	0	8	1	20.570893358495	19.3657245635986	NaN	18.9443225860596	NaN	18.2339286804199	16.0807552337646	0	-0.00308418273925781	0	Q08236	Q08236	Target of rapamycin complex 2 subunit AVO1	AVO1	sp|Q08236|AVO1_YEAST Target of rapamycin complex 2 subunit AVO1 OS=Saccharomyces cerevisiae (strain ATCC 204508 / S288c) OX=559292 GN=AVO1 PE=1 SV=1
NaN	NaN	21.3274536132813	NaN	21.6740493774414	20.2084827423096	#VALUE!	#VALUE!	#VALUE!	#VALUE!	1.46557	2.76172			1	1	1	2.2	2.2	2.2	54.706	0	5.0705	23.0449190191413	3	0	0	1	0	1	1	18.585490734708	NaN	NaN	17.3990783691406	NaN	17.4915409088135	15.1452550888062	0	1.29226875305176	0	Q08268	Q08268	Probable transporter MCH4	MCH4	sp|Q08268|MCH4_YEAST Probable transporter MCH4 OS=Saccharomyces cerevisiae (strain ATCC 204508 / S288c) OX=559292 GN=MCH4 PE=1 SV=1
23.0813159942627	22.3657302856445	NaN	NaN	NaN	21.395923614502	0.715586	1.64215	#VALUE!	#VALUE!	#VALUE!	#VALUE!			4	4	4	11.3	11.3	11.3	55.084	0	7.9931	25.2895779413276	7	2	4	1	0	0	1	21.5891171171139	21.4164791107178	18.0334873199463	NaN	NaN	NaN	16.4163684844971	0	1.20048904418945	0	Q08280	Q08280	Bypass of stop codon protein 6	BSC6	sp|Q08280|BSC6_YEAST Bypass of stop codon protein 6 OS=Saccharomyces cerevisiae (strain ATCC 204508 / S288c) OX=559292 GN=BSC6 PE=1 SV=1
NaN	NaN	22.444580078125	NaN	22.2352027893066	NaN	#VALUE!	#VALUE!	#VALUE!	#VALUE!	#VALUE!	#VALUE!			3	3	3	3.2	3.2	3.2	157.75	0	14.839	23.799860238097	7	0	0	3	0	3	1	18.0719022437332	NaN	NaN	17.6044368743896	NaN	16.218620300293	NaN	0	NaN	0	Q08409	Q08409	ATP-dependent permease AUS1	AUS1	sp|Q08409|AUS1_YEAST ATP-dependent permease AUS1 OS=Saccharomyces cerevisiae (strain ATCC 204508 / S288c) OX=559292 GN=AUS1 PE=3 SV=1
22.6401309967041	NaN	NaN	NaN	22.0641460418701	NaN	#VALUE!	#VALUE!	#VALUE!	#VALUE!	#VALUE!	#VALUE!			2	2	2	25.5	25.5	25.5	18.092	0	15.254	24.7820679830823	2	0	2	0	0	1	0	21.9747030596379	21.8110790252686	NaN	NaN	NaN	18.7532615661621	NaN	0	NaN	0	Q08416	Q08416	Increased recombination centers protein 23	IRC23	sp|Q08416|IRC23_YEAST Increased recombination centers protein 23 OS=Saccharomyces cerevisiae (strain ATCC 204508 / S288c) OX=559292 GN=IRC23 PE=1 SV=1
NaN	NaN	21.3832149505615	NaN	21.6372375488281	NaN	#VALUE!	#VALUE!	#VALUE!	#VALUE!	#VALUE!	#VALUE!			2	2	2	5	5	5	43.186	0.0015528	2.1327	22.9142062733696	3	0	0	2	0	1	0	19.5922781784822	NaN	NaN	18.5923328399658	NaN	18.5922603607178	NaN	0	NaN	0	Q08417	Q08417	Sphingoid long-chain base transporter RSB1	RSB1	sp|Q08417|RSB1_YEAST Sphingoid long-chain base transporter RSB1 OS=Saccharomyces cerevisiae (strain ATCC 204508 / S288c) OX=559292 GN=RSB1 PE=1 SV=3
22.3302478790283	NaN	NaN	NaN	NaN	NaN	#VALUE!	#VALUE!	#VALUE!	#VALUE!	#VALUE!	#VALUE!			4	3	3	8	5.4	5.4	67.193	0.00026185	2.4528	24.1807104726045	4	0	2	1	0	0	0	19.7883710481034	19.5597724914551	NaN	17.0177001953125	NaN	NaN	NaN	0	NaN	0	Q08485	Q08485	Nicotinamide riboside transporter 1	NRT1	sp|Q08485|NRT1_YEAST Nicotinamide riboside transporter 1 OS=Saccharomyces cerevisiae (strain ATCC 204508 / S288c) OX=559292 GN=NRT1 PE=1 SV=1
20.6144123077393	20.2056217193604	NaN	NaN	NaN	NaN	0.408791	1.32757	#VALUE!	#VALUE!	#VALUE!	#VALUE!			2	2	2	3.4	3.4	3.4	63.853	0.0010406	2.2744	22.5520846026917	3	1	2	0	0	0	0	17.5520986783832	17.2362194061279	15.2055644989014	NaN	NaN	NaN	NaN	0	0.408790588378906	0	Q08622	Q08622	Genetic interactor of prohibitins 3, mitochondrial	GEP3	sp|Q08622|GEP3_YEAST Genetic interactor of prohibitins 3, mitochondrial OS=Saccharomyces cerevisiae (strain ATCC 204508 / S288c) OX=559292 GN=GEP3 PE=1 SV=1
NaN	22.1936702728271	NaN	22.2019176483154	21.4805469512939	23.0389709472656	#VALUE!	#VALUE!	#VALUE!	#VALUE!	-1.55842	0.339522			4	4	4	26.1	26.1	26.1	35.209	0	3.77	23.9383154017648	5	2	0	0	3	2	3	20.130942530046	NaN	17.6805801391602	NaN	18.2181186676025	17.9094123840332	18.562047958374	0	-0.997639338175457	0	Q08634	Q08634	Uncharacterized protein YOR238W	YOR238W	sp|Q08634|YO238_YEAST Uncharacterized protein YOR238W OS=Saccharomyces cerevisiae (strain ATCC 204508 / S288c) OX=559292 GN=YOR238W PE=1 SV=2
NaN	23.490816116333	NaN	23.3425884246826	NaN	23.4454383850098	#VALUE!	#VALUE!	#VALUE!	#VALUE!	#VALUE!	#VALUE!			5	5	5	22.2	22.2	22.2	39.724	0	5.7612	25.1682907760741	6	3	1	1	2	1	3	21.0808279348238	18.5384845733643	19.5868835449219	17.2886142730713	18.2305545806885	16.9760055541992	18.7897243499756	0	NaN	0	Q08726	Q08726	GPN-loop GTPase 2	GPN2	sp|Q08726|GPN2_YEAST GPN-loop GTPase 2 OS=Saccharomyces cerevisiae (strain ATCC 204508 / S288c) OX=559292 GN=GPN2 PE=1 SV=1
NaN	NaN	NaN	NaN	19.6858749389648	NaN	#VALUE!	#VALUE!	#VALUE!	#VALUE!	#VALUE!	#VALUE!			1	1	1	7	7	7	27.966	0	2.7808	19.9628225947947	1	0	0	0	0	1	0	16.262406876665	NaN	NaN	NaN	NaN	16.2624073028564	NaN	0	NaN	0	Q08774	Q08774	Required for respiratory growth protein 7, mitochondrial	RRG7	sp|Q08774|RRG7_YEAST Required for respiratory growth protein 7, mitochondrial OS=Saccharomyces cerevisiae (strain ATCC 204508 / S288c) OX=559292 GN=RRG7 PE=1 SV=1
22.1553001403809	NaN	NaN	NaN	NaN	NaN	#VALUE!	#VALUE!	#VALUE!	#VALUE!	#VALUE!	#VALUE!			1	1	1	2.5	2.5	2.5	57.582	0	3.7769	23.777158978172	2	0	1	0	0	0	0	19.9698642675057	19.9698638916016	NaN	NaN	NaN	NaN	NaN	0	NaN	0	Q08777	Q08777	Riboflavin transporter MCH5	MCH5	sp|Q08777|MCH5_YEAST Riboflavin transporter MCH5 OS=Saccharomyces cerevisiae (strain ATCC 204508 / S288c) OX=559292 GN=MCH5 PE=1 SV=2
22.7462215423584	NaN	NaN	NaN	NaN	NaN	#VALUE!	#VALUE!	#VALUE!	#VALUE!	#VALUE!	#VALUE!			4	4	4	9.5	9.5	9.5	80.291	0	3.0153	24.3680635868671	5	0	4	0	0	0	0	19.1586195491213	19.158618927002	NaN	NaN	NaN	NaN	NaN	0	NaN	0	Q08908	Q08908	Ferric reductase transmembrane component 5	FRE5	sp|Q08908|FRE5_YEAST Ferric reductase transmembrane component 5 OS=Saccharomyces cerevisiae (strain ATCC 204508 / S288c) OX=559292 GN=FRE5 PE=2 SV=1
28.0277042388916	22.5714721679688	25.2051963806152	NaN	25.1998157501221	NaN	5.45623	43.9025	#VALUE!	#VALUE!	#VALUE!	#VALUE!			16	16	16	32.2	32.2	32.2	70.22	0	30.483	29.8158612161768	26	2	15	7	0	6	1	24.9578817475806	24.7644081115723	16.8795108795166	21.2248802185059	NaN	20.5154724121094	14.2477788925171	0	3.57276662190755	0	Q08912;Q08989;Q08990	Q08912;Q08989	Uncharacterized protein YOR389W;Uncharacterized protein YPL277C	YOR389W;YPL277C	sp|Q08912|YO389_YEAST Uncharacterized protein YOR389W OS=Saccharomyces cerevisiae (strain ATCC 204508 / S288c) OX=559292 GN=YOR389W PE=1 SV=1;sp|Q08989|YP277_YEAST Uncharacterized protein YPL277C OS=Saccharomyces cerevisiae (strain ATCC 204508 / S288c) OX=
NaN	NaN	24.1950531005859	22.8504886627197	23.6951923370361	NaN	#VALUE!	#VALUE!	1.34456	2.53954	#VALUE!	#VALUE!			3	3	3	11.4	11.4	11.4	41.032	0	27.241	26.1368828768637	3	0	2	1	1	1	0	21.9669461442382	20.3637790679932	NaN	20.3883743286133	17.4789600372314	20.1884593963623	NaN	0	1.09463405609131	0	Q08930	Q08930	Uncharacterized protein YPL191C	YPL191C	sp|Q08930|YP191_YEAST Ubiquitin carboxyl-terminal hydrolase MIY1 OS=Saccharomyces cerevisiae (strain ATCC 204508 / S288c) OX=559292 GN=YPL191C PE=1 SV=1
22.3636455535889	22.2459754943848	NaN	NaN	NaN	NaN	0.11767	1.08498	#VALUE!	#VALUE!	#VALUE!	#VALUE!			5	5	5	8.7	8.7	8.7	78.312	0	3.7391	24.304520667236	6	3	4	0	0	0	0	18.9826204233354	18.548038482666	17.0397109985352	NaN	NaN	NaN	NaN	0	0.117670059204102	0	Q08968	Q08968	UPF0061 protein FMP40	FMP40	sp|Q08968|SELO_YEAST Protein adenylyltransferase SelO, mitochondrial OS=Saccharomyces cerevisiae (strain ATCC 204508 / S288c) OX=559292 GN=FMP40 PE=1 SV=1
21.7582893371582	22.4232158660889	22.1961345672607	NaN	NaN	NaN	-0.664927	0.630721	#VALUE!	#VALUE!	#VALUE!	#VALUE!			2	2	2	6	6	6	52.434	0.0002633	2.6115	24.6357212196907	3	1	2	1	0	0	0	20.2434204005112	19.461540222168	17.8263740539551	18.1302890777588	NaN	NaN	NaN	0	-0.446003913879395	0	Q08970	Q08970	Mitochondrial metal transporter 2	MMT2	sp|Q08970|MMT2_YEAST Mitochondrial metal transporter 2 OS=Saccharomyces cerevisiae (strain ATCC 204508 / S288c) OX=559292 GN=MMT2 PE=3 SV=2
23.4230365753174	NaN	21.3244895935059	NaN	21.656436920166	NaN	#VALUE!	#VALUE!	#VALUE!	#VALUE!	#VALUE!	#VALUE!			3	3	3	23.8	23.8	23.8	22.197	0	8.1036	25.4186689821487	6	0	3	2	0	2	0	22.0967408872613	21.89404296875	NaN	17.9458675384521	NaN	18.3556098937988	NaN	0	NaN	0	Q08974	Q08974	Uncharacterized membrane protein YPL257W	YPL257W	sp|Q08974|YP257_YEAST Uncharacterized membrane protein YPL257W OS=Saccharomyces cerevisiae (strain ATCC 204508 / S288c) OX=559292 GN=YPL257W PE=1 SV=1
NaN	NaN	23.1583385467529	NaN	23.7820682525635	21.740406036377	#VALUE!	#VALUE!	#VALUE!	#VALUE!	2.04166	4.1172			3	3	3	7.7	7.7	7.7	62.782	0	8.8751	24.9894953287427	8	1	1	2	1	2	1	20.7415591532994	NaN	NaN	19.4414577484131	NaN	19.811149597168	16.8886947631836	0	1.72979736328125	0	Q12001	Q12001	Dolichyl pyrophosphate Man9GlcNAc2 alpha-1,3-glucosyltransferase	ALG6	sp|Q12001|ALG6_YEAST Dolichyl pyrophosphate Man9GlcNAc2 alpha-1,3-glucosyltransferase OS=Saccharomyces cerevisiae (strain ATCC 204508 / S288c) OX=559292 GN=ALG6 PE=1 SV=1
25.3832416534424	NaN	26.7182960510254	NaN	26.8168983459473	21.040060043335	#VALUE!	#VALUE!	#VALUE!	#VALUE!	5.77684	54.8279			9	9	9	24.5	24.5	24.5	40.748	0	45.992	28.769322634253	32	0	5	8	0	9	1	24.5213919676499	23.0502109527588	NaN	22.9879951477051	NaN	22.7455043792725	15.4275751113892	0	5.26608530680339	0	Q12003	Q12003	Serine/threonine-protein kinase ENV7	ENV7	sp|Q12003|ENV7_YEAST Serine/threonine-protein kinase ENV7 OS=Saccharomyces cerevisiae (strain ATCC 204508 / S288c) OX=559292 GN=ENV7 PE=1 SV=1
NaN	NaN	26.1405544281006	23.0482330322266	25.0078716278076	NaN	#VALUE!	#VALUE!	3.09232	8.52867	#VALUE!	#VALUE!			4	4	4	29.3	29.3	29.3	31.346	0	22.094	27.3353475532745	14	0	1	3	2	3	0	24.0134194583871	20.5473613739014	NaN	23.2419967651367	18.1679077148438	22.3062191009521	NaN	0	2.52597999572754	0	Q12042	Q12042	Vacuolar membrane protein YPL162C	YPL162C	sp|Q12042|YP162_YEAST Vacuolar membrane protein YPL162C OS=Saccharomyces cerevisiae (strain ATCC 204508 / S288c) OX=559292 GN=YPL162C PE=1 SV=1
26.2978916168213	NaN	26.6166667938232	24.3091087341309	26.8589916229248	NaN	#VALUE!	#VALUE!	2.30756	4.95044	#VALUE!	#VALUE!			18	18	18	30.2	30.2	30.2	84.715	0	68.258	28.8440388046325	47	0	11	16	1	16	0	23.8440268285314	21.310302734375	NaN	22.6979942321777	14.9736528396606	22.4225234985352	NaN	0	2.28207461039225	0	Q12043	Q12043	Lipase 5	TGL5	sp|Q12043|TGL5_YEAST Triacylglycerol lipase 5 OS=Saccharomyces cerevisiae (strain ATCC 204508 / S288c) OX=559292 GN=TGL5 PE=1 SV=1
20.2974853515625	NaN	NaN	NaN	NaN	18.8877143859863	#VALUE!	#VALUE!	#VALUE!	#VALUE!	#VALUE!	#VALUE!			2	2	2	7.4	7.4	7.4	38.43	0	4.2203	23.9544689714343	2	1	1	0	0	1	1	19.7845102451812	17.7494373321533	17.9060096740723	NaN	NaN	18.6779670715332	14.1139860153198	0	1.40977096557617	0	Q12046	Q12046	Pre-mRNA-splicing factor CWC2	CWC2	sp|Q12046|CWC2_YEAST Pre-mRNA-splicing factor CWC2 OS=Saccharomyces cerevisiae (strain ATCC 204508 / S288c) OX=559292 GN=CWC2 PE=1 SV=1
20.1568431854248	21.6939601898193	NaN	NaN	NaN	21.7136001586914	-1.53712	0.344573	#VALUE!	#VALUE!	#VALUE!	#VALUE!			3	3	3	11.6	11.6	11.6	38.651	0	2.9697	23.3894254797379	4	1	1	0	2	1	2	19.2194663405864	17.1050281524658	16.7894058227539	NaN	17.3614463806152	NaN	17.5188369750977	0	-1.54693698883057	0	Q12051	Q12051	Geranylgeranyl pyrophosphate synthase	BTS1	sp|Q12051|GGPPS_YEAST Geranylgeranyl pyrophosphate synthase OS=Saccharomyces cerevisiae (strain ATCC 204508 / S288c) OX=559292 GN=BTS1 PE=1 SV=1
NaN	25.9622135162354	NaN	26.8427810668945	NaN	25.8932609558105	#VALUE!	#VALUE!	#VALUE!	#VALUE!	#VALUE!	#VALUE!			2	2	2	5.7	5.7	5.7	52.373	0	8.7342	27.872381333351	3	2	0	0	1	0	1	23.2874305756535	NaN	23.2649917602539	NaN	16.6178398132324	NaN	15.8076066970825	0	NaN	0	Q12104	Q12104	Transcriptional protein SWT1	SWT1	sp|Q12104|SWT1_YEAST Transcriptional protein SWT1 OS=Saccharomyces cerevisiae (strain ATCC 204508 / S288c) OX=559292 GN=SWT1 PE=1 SV=1
NaN	NaN	NaN	NaN	24.0285892486572	NaN	#VALUE!	#VALUE!	#VALUE!	#VALUE!	#VALUE!	#VALUE!			61	3	0	47.2	3.2	0	199	0	3.9903	25.0231837854346	4	0	2	0	0	1	0	18.7943650949387	17.4428939819336	NaN	NaN	NaN	18.0767631530762	NaN	0	NaN	0	Q12112	Q12112	Transposon Ty1-NL1 Gag-Pol polyprotein;Capsid protein;Ty1 protease;Integrase;Reverse transcriptase/ribonuclease H	TY1B-NL1	sp|Q12112|YN11B_YEAST Transposon Ty1-NL1 Gag-Pol polyprotein OS=Saccharomyces cerevisiae (strain ATCC 204508 / S288c) OX=559292 GN=TY1B-NL1 PE=3 SV=1
23.3784866333008	21.8426074981689	24.5941162109375	NaN	24.5957107543945	NaN	1.53588	2.89965	#VALUE!	#VALUE!	#VALUE!	#VALUE!			3	3	3	10.1	10.1	10.1	52.23	0	18.28	26.688858561703	11	2	2	2	0	2	1	22.7819679660944	21.1994037628174	18.1103401184082	21.1757850646973	NaN	20.9323616027832	17.2037105560303	0	2.34683036804199	0	Q12116	Q12116	Membrane protein TMS1	TMS1	sp|Q12116|TMS1_YEAST Membrane protein TMS1 OS=Saccharomyces cerevisiae (strain ATCC 204508 / S288c) OX=559292 GN=TMS1 PE=1 SV=1
25.1959552764893	NaN	22.9910793304443	NaN	23.1587867736816	NaN	#VALUE!	#VALUE!	#VALUE!	#VALUE!	#VALUE!	#VALUE!			2	2	2	11.8	11.8	11.8	40.751	0	37.833	27.1129693310635	6	0	2	1	0	1	0	23.4124799153719	23.1880512237549	NaN	19.7153854370117	NaN	19.5129871368408	NaN	0	NaN	0	Q12121	Q12121	Uncharacterized protein YDL211C		sp|Q12121|YD211_YEAST Uncharacterized protein YDL211C OS=Saccharomyces cerevisiae (strain ATCC 204508 / S288c) OX=559292 GN=YDL211C PE=1 SV=1
21.869815826416	21.4657802581787	22.6611652374268	NaN	23.9469051361084	NaN	0.404036	1.3232	#VALUE!	#VALUE!	#VALUE!	#VALUE!			2	2	2	5.9	5.9	5.9	32.637	0.00026281	2.5883	25.3341202208879	6	1	2	2	0	2	0	21.6336941455111	19.0876293182373	16.0330352783203	20.0692024230957	NaN	20.5446281433105	NaN	0	1.36018180847168	0	Q12144	Q12144	Pore and endoplasmic reticulum protein of 33 kDa	PER33	sp|Q12144|PER33_YEAST Pore and endoplasmic reticulum protein of 33 kDa OS=Saccharomyces cerevisiae (strain ATCC 204508 / S288c) OX=559292 GN=PER33 PE=1 SV=1
NaN	NaN	NaN	20.3522930145264	20.251070022583	21.0606536865234	#VALUE!	#VALUE!	#VALUE!	#VALUE!	-0.809584	0.570546			1	1	1	4.6	4.6	4.6	21.952	0.0012977	2.2158	21.8388053701995	4	0	0	1	1	1	1	18.838828447597	NaN	NaN	NaN	16.6091785430908	17.5280265808105	17.4568347930908	0	-0.455403327941895	0	Q12146	Q12146	DNA replication complex GINS protein PSF3	PSF3	sp|Q12146|PSF3_YEAST DNA replication complex GINS protein PSF3 OS=Saccharomyces cerevisiae (strain ATCC 204508 / S288c) OX=559292 GN=PSF3 PE=1 SV=2
22.0145778656006	20.7267532348633	22.0666103363037	NaN	22.2551116943359	NaN	1.28782	2.4416	#VALUE!	#VALUE!	#VALUE!	#VALUE!			5	5	5	2.1	2.1	2.1	338.25	0	5.7246	24.9276409005845	8	1	2	3	1	3	0	17.8295988720217	16.4221801757813	12.6394309997559	15.6056823730469	15.1774978637695	15.6612768173218	NaN	0	1.38534673055013	0	Q12150	Q12150	Protein CSF1	CSF1	sp|Q12150|CSF1_YEAST Protein CSF1 OS=Saccharomyces cerevisiae (strain ATCC 204508 / S288c) OX=559292 GN=CSF1 PE=3 SV=1
20.2121677398682	22.1684894561768	NaN	NaN	NaN	NaN	-1.95632	0.257685	#VALUE!	#VALUE!	#VALUE!	#VALUE!			11	2	2	32.5	7.5	7.5	51.855	0.00026371	2.6728	23.3204469081362	5	1	2	1	0	0	0	18.735456861662	18.0981559753418	17.2497978210449	NaN	NaN	NaN	NaN	0	-1.95632171630859	0	Q12153	Q12153	Ribosome biogenesis protein SSF2	SSF2	sp|Q12153|SSF2_YEAST Ribosome biogenesis protein SSF2 OS=Saccharomyces cerevisiae (strain ATCC 204508 / S288c) OX=559292 GN=SSF2 PE=1 SV=1
NaN	NaN	21.8035297393799	NaN	22.3143196105957	NaN	#VALUE!	#VALUE!	#VALUE!	#VALUE!	#VALUE!	#VALUE!			2	2	2	5	5	5	54.893	0	2.926	23.5611583333993	1	0	0	2	1	2	1	19.1688630573405	NaN	NaN	18.4093074798584	13.4650564193726	17.7482585906982	13.2534637451172	0	NaN	0	Q12194	Q12194	Uncharacterized protein YPL066W		sp|Q12194|RGL1_YEAST RHO1 GEF localizing protein 1 OS=Saccharomyces cerevisiae (strain ATCC 204508 / S288c) OX=559292 GN=RGL1 PE=1 SV=1
NaN	NaN	21.5169162750244	21.3519706726074	NaN	22.4640846252441	#VALUE!	#VALUE!	0.164946	1.12112	#VALUE!	#VALUE!			81	1	0	58.1	1.4	0	198.61	0	5.0092	23.2542178314552	1	0	0	1	1	0	1	17.0643428026005	NaN	NaN	16.0093250274658	14.4052076339722	NaN	15.5920190811157	0	-0.391111373901367	0	Q12273	Q12273	Transposon Ty1-OL Gag-Pol polyprotein;Capsid protein;Ty1 protease;Integrase;Reverse transcriptase/ribonuclease H	TY1B-OL	sp|Q12273|YO11B_YEAST Transposon Ty1-OL Gag-Pol polyprotein OS=Saccharomyces cerevisiae (strain ATCC 204508 / S288c) OX=559292 GN=TY1B-OL PE=3 SV=1
27.8669109344482	NaN	27.3548107147217	NaN	28.3552722930908	28.0588397979736	#VALUE!	#VALUE!	#VALUE!	#VALUE!	0.296432	1.2281			7	7	7	27.6	27.6	27.6	22.141	0	14.518	29.5855958884206	17	0	7	2	0	4	3	26.4156744683731	23.7704200744629	NaN	20.7197532653809	NaN	21.2705345153809	26.0803604125977	0	-0.199841817220051	0	Q12284	Q12284	FAD-linked sulfhydryl oxidase ERV2	ERV2	sp|Q12284|ERV2_YEAST FAD-linked sulfhydryl oxidase ERV2 OS=Saccharomyces cerevisiae (strain ATCC 204508 / S288c) OX=559292 GN=ERV2 PE=1 SV=1
NaN	NaN	21.3922595977783	NaN	21.4797096252441	21.6831188201904	#VALUE!	#VALUE!	#VALUE!	#VALUE!	-0.203409	0.868496			2	2	2	6	6	6	82.444	0	2.8099	23.3121595035901	2	0	0	2	0	1	1	18.2246800397375	NaN	NaN	17.3612747192383	NaN	16.4030113220215	15.6466150283813	0	-0.247134208679199	0	Q12309	Q12309	Pre-mRNA-splicing factor CLF1	CLF1	sp|Q12309|CLF1_YEAST Pre-mRNA-splicing factor CLF1 OS=Saccharomyces cerevisiae (strain ATCC 204508 / S288c) OX=559292 GN=CLF1 PE=1 SV=1
NaN	NaN	24.4648818969727	25.4349174499512	NaN	25.5636920928955	#VALUE!	#VALUE!	-0.970036	0.510493	#VALUE!	#VALUE!			3	3	3	25.1	25.1	25.1	34.863	0	39.037	26.4498833846493	4	1	1	1	2	1	1	22.3624158218095	17.7993068695068	16.2017593383789	20.1996440887451	20.3847961425781	NaN	21.2623558044434	0	-1.03442287445068	0	Q12326	Q12326	Phosphoglycerate mutase 3	GPM3	sp|Q12326|PMG3_YEAST Phosphoglycerate mutase 3 OS=Saccharomyces cerevisiae (strain ATCC 204508 / S288c) OX=559292 GN=GPM3 PE=1 SV=1
20.9822444915771	22.0633220672607	NaN	NaN	NaN	21.1440753936768	-1.08108	0.472676	#VALUE!	#VALUE!	#VALUE!	#VALUE!			3	3	3	19.3	19.3	19.3	21.864	0	4.8676	23.8599388923431	6	1	3	0	0	0	1	20.6900423181093	20.1538791656494	18.5714855194092	NaN	NaN	NaN	17.0483589172363	0	-0.621454238891602	0	Q12328	Q12328	Mitochondrial import inner membrane translocase subunit TIM22	TIM22	sp|Q12328|TIM22_YEAST Mitochondrial import inner membrane translocase subunit TIM22 OS=Saccharomyces cerevisiae (strain ATCC 204508 / S288c) OX=559292 GN=TIM22 PE=1 SV=1
27.3760871887207	25.4066219329834	NaN	NaN	NaN	NaN	1.96947	3.91623	#VALUE!	#VALUE!	#VALUE!	#VALUE!			14	14	14	30	30	30	70.905	0	47.796	29.237447916103	16	6	13	0	0	0	1	24.3305345260428	24.2839736938477	19.314489364624	NaN	NaN	NaN	14.1733646392822	0	1.9694652557373	0	Q12333	Q12333	Ferric/cupric reductase transmembrane component 7	FRE7	sp|Q12333|FRE7_YEAST Ferric/cupric reductase transmembrane component 7 OS=Saccharomyces cerevisiae (strain ATCC 204508 / S288c) OX=559292 GN=FRE7 PE=1 SV=2
NaN	NaN	21.8854675292969	NaN	22.0445690155029	22.5901908874512	#VALUE!	#VALUE!	#VALUE!	#VALUE!	-0.545622	0.685096			4	4	4	28.4	28.4	28.4	28.242	0	20.658	24.7077252095402	10	2	2	1	1	1	1	21.3857971146529	18.7075538635254	19.3075923919678	19.0946025848389	17.3208713531494	18.9996204376221	18.6644535064697	0	-0.62517261505127	0	Q12345	Q12345	Ino eighty subunit 3	IES3	sp|Q12345|IES3_YEAST Ino eighty subunit 3 OS=Saccharomyces cerevisiae (strain ATCC 204508 / S288c) OX=559292 GN=IES3 PE=1 SV=1
23.7637500762939	NaN	22.6824321746826	NaN	22.6884212493896	NaN	#VALUE!	#VALUE!	#VALUE!	#VALUE!	#VALUE!	#VALUE!			3	3	3	8.2	8.2	8.2	64.217	0	4.1272	26.0568270418621	3	1	3	2	0	3	0	21.9693724675893	21.6201515197754	16.7393856048584	18.6339950561523	NaN	18.4835720062256	NaN	0	NaN	0	Q12372	Q12372	S-methylmethionine permease 1	MMP1	sp|Q12372|MMP1_YEAST S-methylmethionine permease 1 OS=Saccharomyces cerevisiae (strain ATCC 204508 / S288c) OX=559292 GN=MMP1 PE=1 SV=1
22.7225704193115	22.6411018371582	NaN	NaN	NaN	NaN	0.0814686	1.05809	#VALUE!	#VALUE!	#VALUE!	#VALUE!			3	3	3	11.3	11.3	11.3	31.519	0	7.9161	24.912370777439	4	1	3	0	0	0	0	21.211931059298	20.9770812988281	18.4771022796631	NaN	NaN	NaN	NaN	0	0.0814685821533203	0	Q12375	Q12375	Mitochondrial ornithine transporter 1	ORT1	sp|Q12375|ORT1_YEAST Mitochondrial ornithine transporter 1 OS=Saccharomyces cerevisiae (strain ATCC 204508 / S288c) OX=559292 GN=ORT1 PE=1 SV=2
NaN	NaN	NaN	22.5450057983398	NaN	22.3388118743896	#VALUE!	#VALUE!	#VALUE!	#VALUE!	#VALUE!	#VALUE!			3	3	3	10.9	10.9	10.9	54.094	0	3.1855	23.4577626095011	5	2	0	0	1	0	2	18.6504627845442	NaN	17.2534961700439	NaN	16.9944648742676	NaN	16.9276390075684	0	NaN	0	Q12383	Q12383	tRNA:m(4)X modification enzyme TRM13	TRM13	sp|Q12383|TRM13_YEAST tRNA:m(4)X modification enzyme TRM13 OS=Saccharomyces cerevisiae (strain ATCC 204508 / S288c) OX=559292 GN=TRM13 PE=1 SV=1
23.7787628173828	NaN	NaN	NaN	NaN	NaN	#VALUE!	#VALUE!	#VALUE!	#VALUE!	#VALUE!	#VALUE!			10	1	0	39.1	2.7	0	49.308	0.0048668	1.833	25.4006079508813	1	0	1	0	0	0	0	21.5932725712259	21.5932731628418	NaN	NaN	NaN	NaN	NaN	0	NaN	0	Q12391	Q12391	Transposon Ty1-NL1 Gag polyprotein;Capsid protein;Gag-p4	TY1A-NL1	sp|Q12391|YN11A_YEAST Transposon Ty1-NL1 Gag polyprotein OS=Saccharomyces cerevisiae (strain ATCC 204508 / S288c) OX=559292 GN=TY1A-NL1 PE=2 SV=1
21.7457904815674	22.123477935791	20.0614452362061	NaN	NaN	NaN	-0.377687	0.76967	#VALUE!	#VALUE!	#VALUE!	#VALUE!			3	3	3	8.4	8.4	8.4	50.7	0	3.5213	24.080746626455	4	3	3	1	0	0	0	19.2227477428713	18.7003593444824	17.2951774597168	14.6113128662109	NaN	NaN	NaN	0	-1.2198600769043	0	Q12417	Q12417	Pre-mRNA-splicing factor PRP46	PRP46	sp|Q12417|PRP46_YEAST Pre-mRNA-splicing factor PRP46 OS=Saccharomyces cerevisiae (strain ATCC 204508 / S288c) OX=559292 GN=PRP46 PE=1 SV=1
22.8812713623047	NaN	23.0236415863037	NaN	22.6550388336182	NaN	#VALUE!	#VALUE!	#VALUE!	#VALUE!	#VALUE!	#VALUE!			4	4	4	17.3	17.3	17.3	56.356	0	25.522	25.0691950447985	9	0	2	4	0	4	0	20.4842407404864	18.3585739135742	NaN	19.3646984100342	NaN	18.7973766326904	NaN	0	NaN	0	Q12418	Q12418	Protein GIS3	GIS3	sp|Q12418|GIS3_YEAST Protein GIS3 OS=Saccharomyces cerevisiae (strain ATCC 204508 / S288c) OX=559292 GN=GIS3 PE=1 SV=1
NaN	NaN	NaN	NaN	20.6862850189209	NaN	#VALUE!	#VALUE!	#VALUE!	#VALUE!	#VALUE!	#VALUE!			4	4	4	22.4	22.4	22.4	22.191	0	5.5825	22.5043854949845	6	0	1	3	0	2	0	19.1824574000971	18.5751113891602	NaN	NaN	NaN	17.6413173675537	NaN	0	NaN	0	Q12421	Q12421	Autophagy-related protein 31	ATG31	sp|Q12421|ATG31_YEAST Autophagy-related protein 31 OS=Saccharomyces cerevisiae (strain ATCC 204508 / S288c) OX=559292 GN=ATG31 PE=1 SV=1
24.8758182525635	NaN	25.7484760284424	NaN	26.0694618225098	NaN	#VALUE!	#VALUE!	#VALUE!	#VALUE!	#VALUE!	#VALUE!			10	10	10	22.3	22.3	22.3	85.982	0	68.75	27.8019949412245	17	0	4	6	0	8	0	23.2170151781201	20.8396892547607	NaN	21.9563140869141	NaN	21.8592758178711	NaN	0	NaN	0	Q12424	Q12424	Putative cation exchanger YDL206W		sp|Q12424|YD206_YEAST Putative cation exchanger YDL206W OS=Saccharomyces cerevisiae (strain ATCC 204508 / S288c) OX=559292 GN=YDL206W PE=1 SV=1
20.6185398101807	21.2749767303467	22.4709758758545	NaN	22.4364185333252	NaN	-0.656437	0.634443	#VALUE!	#VALUE!	#VALUE!	#VALUE!			2	2	2	16.8	16.8	16.8	20.876	0	2.9587	24.3888345207434	5	1	1	1	0	2	0	21.066906425856	18.5784320831299	17.6130275726318	19.3400630950928	NaN	19.8440494537354	NaN	0	0.567001342773438	0	Q12425	Q12425	Iron-sulfur assembly protein 2	ISA2	sp|Q12425|ISA2_YEAST Iron-sulfur assembly protein 2 OS=Saccharomyces cerevisiae (strain ATCC 204508 / S288c) OX=559292 GN=ISA2 PE=1 SV=1
NaN	22.2497978210449	NaN	22.7578620910645	21.9030838012695	23.0404949188232	#VALUE!	#VALUE!	#VALUE!	#VALUE!	-1.13741	0.454575			3	3	3	13.8	13.8	13.8	56.263	0	19.226	24.1017339999048	9	1	0	0	3	1	3	19.5168003479878	NaN	16.9414596557617	NaN	17.7876853942871	16.8717136383057	18.0851917266846	0	-0.779634475708008	0	Q12427	Q12427	Protein STB3	STB3	sp|Q12427|STB3_YEAST Protein STB3 OS=Saccharomyces cerevisiae (strain ATCC 204508 / S288c) OX=559292 GN=STB3 PE=1 SV=1
23.907657623291	23.771427154541	NaN	NaN	NaN	NaN	0.13623	1.09903	#VALUE!	#VALUE!	#VALUE!	#VALUE!			5	5	5	14.1	14.1	14.1	57.683	0	5.7672	25.8999588914716	10	4	5	0	0	0	0	20.9457810141363	20.5691318511963	18.8239212036133	NaN	NaN	NaN	NaN	0	0.13623046875	0	Q12428	Q12428	Probable 2-methylcitrate dehydratase	PDH1	sp|Q12428|PRPD_YEAST Probable 2-methylcitrate dehydratase OS=Saccharomyces cerevisiae (strain ATCC 204508 / S288c) OX=559292 GN=PDH1 PE=1 SV=1
23.8188991546631	NaN	NaN	NaN	NaN	21.350622177124	#VALUE!	#VALUE!	#VALUE!	#VALUE!	#VALUE!	#VALUE!			6	6	6	23.7	23.7	23.7	46.362	0	13.831	25.8427328240894	8	0	5	1	0	1	1	22.0353683124818	21.8028202056885	NaN	17.9109935760498	NaN	18.4350185394287	15.2521848678589	0	2.46827697753906	0	Q12436	Q12436	Zinc-regulated transporter 2	ZRT2	sp|Q12436|ZRT2_YEAST Zinc-regulated transporter 2 OS=Saccharomyces cerevisiae (strain ATCC 204508 / S288c) OX=559292 GN=ZRT2 PE=1 SV=1
21.0080585479736	NaN	NaN	NaN	NaN	NaN	#VALUE!	#VALUE!	#VALUE!	#VALUE!	#VALUE!	#VALUE!			2	2	2	3.4	3.4	3.4	75.33	0.0095935	1.464	22.6298981908051	1	0	2	0	0	0	0	17.4204537162668	17.4204540252686	NaN	NaN	NaN	NaN	NaN	0	NaN	0	Q12469	Q12469	Serine/threonine-protein kinase SKM1	SKM1	sp|Q12469|SKM1_YEAST Serine/threonine-protein kinase SKM1 OS=Saccharomyces cerevisiae (strain ATCC 204508 / S288c) OX=559292 GN=SKM1 PE=1 SV=1
NaN	NaN	NaN	21.9639511108398	NaN	22.0298862457275	#VALUE!	#VALUE!	#VALUE!	#VALUE!	#VALUE!	#VALUE!			1	1	1	3.5	3.5	3.5	45.317	0.0091001	1.4858	22.3270701447092	2	0	0	0	1	0	1	18.3270701447092	NaN	NaN	NaN	17.2208137512207	NaN	17.4260349273682	0	NaN	0	Q12471	Q12471	6-phosphofructo-2-kinase 2	PFK27	sp|Q12471|6P22_YEAST 6-phosphofructo-2-kinase 2 OS=Saccharomyces cerevisiae (strain ATCC 204508 / S288c) OX=559292 GN=PFK27 PE=1 SV=1
22.2599449157715	23.1414279937744	NaN	23.4296913146973	NaN	23.131067276001	-0.881483	0.542809	#VALUE!	#VALUE!	#VALUE!	#VALUE!			3	3	3	7.1	7.1	7.1	57.288	0	8.6618	25.3303635561741	12	2	2	0	2	0	2	21.0084696568814	19.8119640350342	19.5618438720703	NaN	17.7605895996094	NaN	17.5583915710449	0	-0.974117279052734	0	Q12504	Q12504	Ribosomal lysine N-methyltransferase 4	RKM4	sp|Q12504|RKM4_YEAST Ribosomal lysine N-methyltransferase 4 OS=Saccharomyces cerevisiae (strain ATCC 204508 / S288c) OX=559292 GN=RKM4 PE=1 SV=1
NaN	NaN	NaN	20.3302478790283	NaN	20.8456745147705	#VALUE!	#VALUE!	#VALUE!	#VALUE!	#VALUE!	#VALUE!			3	3	3	10.3	10.3	10.3	50.043	0	2.9869	23.3336085240731	6	2	1	0	1	0	1	18.9412597113153	18.1579780578613	16.8030967712402	NaN	15.1947565078735	NaN	15.8495025634766	0	NaN	0	Q12509	Q12509	Actin-like protein ARP6	ARP6	sp|Q12509|ARP6_YEAST Actin-like protein ARP6 OS=Saccharomyces cerevisiae (strain ATCC 204508 / S288c) OX=559292 GN=ARP6 PE=1 SV=1
NaN	NaN	NaN	22.1374931335449	NaN	22.0666427612305	#VALUE!	#VALUE!	#VALUE!	#VALUE!	#VALUE!	#VALUE!			3	3	3	6.5	6.5	6.5	59.155	0	4.5175	23.9522485519962	3	1	2	1	1	0	1	19.1448722973424	18.0035514831543	16.2557849884033	15.1734819412231	16.5870018005371	NaN	16.6555023193359	0	NaN	0	Q12510	Q12510	DNA damage-binding protein CMR1	CMR1	sp|Q12510|CMR1_YEAST DNA damage-binding protein CMR1 OS=Saccharomyces cerevisiae (strain ATCC 204508 / S288c) OX=559292 GN=CMR1 PE=1 SV=1
23.6323413848877	20.9096183776855	22.4994297027588	NaN	22.8016376495361	NaN	2.72272	6.60118	#VALUE!	#VALUE!	#VALUE!	#VALUE!			6	6	6	14.4	14.4	14.4	49.58	0	12.104	25.7749997432705	12	1	4	5	0	3	0	21.2514754759922	20.5052337646484	14.9297666549683	19.4343681335449	NaN	18.0341873168945	NaN	0	2.06818453470866	0	Q12516	Q12516	Regulator of phospholipase D SRF1	SRF1	sp|Q12516|SRF1_YEAST Regulator of phospholipase D SRF1 OS=Saccharomyces cerevisiae (strain ATCC 204508 / S288c) OX=559292 GN=SRF1 PE=1 SV=1
21.2805366516113	NaN	22.3500289916992	NaN	NaN	NaN	#VALUE!	#VALUE!	#VALUE!	#VALUE!	#VALUE!	#VALUE!			2	2	2	7.3	7.3	7.3	57.323	0	5.2952	23.8018346397202	4	0	1	2	0	0	0	19.2782588722386	18.0088119506836	NaN	18.5052146911621	NaN	NaN	NaN	0	NaN	0	Q12523	Q12523	WD repeat-containing protein YPL247C	YPL247C	sp|Q12523|YP247_YEAST WD repeat-containing protein YPL247C OS=Saccharomyces cerevisiae (strain ATCC 204508 / S288c) OX=559292 GN=YPL247C PE=1 SV=1
NaN	NaN	NaN	21.4457168579102	NaN	20.9740028381348	#VALUE!	#VALUE!	#VALUE!	#VALUE!	#VALUE!	#VALUE!			1	1	1	5.2	5.2	5.2	36.714	0	2.884	21.5459486168804	3	0	0	0	1	0	1	17.458438655681	NaN	NaN	NaN	16.6151123046875	NaN	16.2827091217041	0	NaN	0	Q12525	Q12525	Homocysteine S-methyltransferase 1	MHT1	sp|Q12525|MHT1_YEAST Homocysteine S-methyltransferase 1 OS=Saccharomyces cerevisiae (strain ATCC 204508 / S288c) OX=559292 GN=MHT1 PE=1 SV=1
25.7976856231689	24.435998916626	25.1974563598633	NaN	25.1084098815918	NaN	1.36169	2.56985	#VALUE!	#VALUE!	#VALUE!	#VALUE!			19	19	19	19.6	19.6	19.6	135.02	0	36.624	28.2499306071643	25	6	16	7	1	6	1	22.3919441885308	21.4533729553223	17.2861785888672	20.038854598999	17.6130275726318	19.9667701721191	17.3744106292725	0	0.931851704915363	0	Q12527	Q12527	Autophagy-related protein 11	ATG11	sp|Q12527|ATG11_YEAST Autophagy-related protein 11 OS=Saccharomyces cerevisiae (strain ATCC 204508 / S288c) OX=559292 GN=ATG11 PE=1 SV=1
22.7103233337402	22.0235061645508	NaN	NaN	NaN	NaN	0.686817	1.60973	#VALUE!	#VALUE!	#VALUE!	#VALUE!			1	1	1	9.4	9.4	9.4	9.7376	0.0095911	1.4597	24.5974160905797	2	1	1	0	0	0	0	23.0124649567776	22.7472057342529	20.4385757446289	NaN	NaN	NaN	NaN	0	0.686817169189453	0	Q3E747	Q3E747	Uncharacterized protein YLR363W-A	YLR363W-A	sp|Q3E747|YL363_YEAST Uncharacterized protein YLR363W-A OS=Saccharomyces cerevisiae (strain ATCC 204508 / S288c) OX=559292 GN=YLR363W-A PE=1 SV=1
21.6545162200928	21.5592212677002	NaN	NaN	NaN	NaN	0.095295	1.06828	#VALUE!	#VALUE!	#VALUE!	#VALUE!			1	1	1	40.3	40.3	40.3	7.0548	0	6.4426	23.6594890238874	3	1	1	0	0	0	0	22.6594672471941	22.2763404846191	20.559268951416	NaN	NaN	NaN	NaN	0	0.0952949523925781	0	Q3E752	Q3E752	Uncharacterized protein YPR036W-A	YPR036W-A	sp|Q3E752|SPO24_YEAST Sporulation protein 24 OS=Saccharomyces cerevisiae (strain ATCC 204508 / S288c) OX=559292 GN=SPO24 PE=1 SV=1
NaN	NaN	22.938549041748	NaN	22.8820190429688	21.5874691009521	#VALUE!	#VALUE!	#VALUE!	#VALUE!	1.29455	2.453			1	1	1	10.8	10.8	10.8	13.741	0	13.009	24.4585763299614	4	0	0	1	0	1	1	21.8736138292402	NaN	NaN	20.8846473693848	NaN	20.5740394592285	18.39870262146	0	1.32281494140625	0	Q3E776	Q3E776	Uncharacterized protein YBR255C-A	YBR255C-A	sp|Q3E776|YB255_YEAST Uncharacterized protein YBR255C-A OS=Saccharomyces cerevisiae (strain ATCC 204508 / S288c) OX=559292 GN=YBR255C-A PE=4 SV=1
NaN	NaN	NaN	21.0831031799316	NaN	21.5076065063477	#VALUE!	#VALUE!	#VALUE!	#VALUE!	#VALUE!	#VALUE!			2	2	2	27.1	27.1	27.1	9.7348	0.0002611	2.3711	21.666744111578	3	0	0	0	1	0	2	19.0817642769183	NaN	NaN	NaN	17.2438621520996	NaN	18.6084136962891	0	NaN	0	Q3E784	Q3E784	SCOCO-like protein 1	SLO1	sp|Q3E784|SLO1_YEAST SCOCO-like protein 1 OS=Saccharomyces cerevisiae (strain ATCC 204508 / S288c) OX=559292 GN=SLO1 PE=1 SV=1
22.7686233520508	NaN	24.6768589019775	22.9931545257568	24.6676330566406	NaN	#VALUE!	#VALUE!	1.6837	3.21252	#VALUE!	#VALUE!			1	1	1	12.5	12.5	12.5	9.5791	0.00026247	2.5553	27.1188216549065	7	0	1	1	1	1	0	26.1187820579574	24.0016994476318	NaN	24.7872085571289	20.9590759277344	24.5800342559814	NaN	0	1.04455057779948	0	Q3E790	Q3E790	Serine palmitoyltransferase-regulating protein TSC3	TSC3	sp|Q3E790|TSC3_YEAST Serine palmitoyltransferase-regulating protein TSC3 OS=Saccharomyces cerevisiae (strain ATCC 204508 / S288c) OX=559292 GN=TSC3 PE=1 SV=1
21.2234077453613	21.5210914611816	NaN	NaN	NaN	NaN	-0.297684	0.813558	#VALUE!	#VALUE!	#VALUE!	#VALUE!			2	2	2	35.1	35.1	35.1	7.7407	0.00026082	2.3559	23.1581849889585	3	2	1	0	0	0	0	20.573207075899	19.8779850006104	19.1863555908203	NaN	NaN	NaN	NaN	0	-0.297683715820313	0	Q3E7A3	Q3E7A3	Uncharacterized protein YJL133C-A	YJL133C-A	sp|Q3E7A3|YJ133_YEAST Uncharacterized protein YJL133C-A OS=Saccharomyces cerevisiae (strain ATCC 204508 / S288c) OX=559292 GN=YJL133C-A PE=1 SV=1
NaN	NaN	23.6426219940186	23.0908908843994	24.0020446777344	NaN	#VALUE!	#VALUE!	0.551731	1.46584	#VALUE!	#VALUE!			2	2	2	12.8	12.8	12.8	12.947	0	7.6739	25.444585497499	8	0	1	2	1	2	1	22.859616678161	NaN	NaN	21.6361312866211	19.4900722503662	21.7856044769287	NaN	0	0.731442451477051	0	Q3E7A4	Q3E7A4	COX assembly mitochondrial protein 2	CMC2	sp|Q3E7A4|COXM2_YEAST COX assembly mitochondrial protein 2 OS=Saccharomyces cerevisiae (strain ATCC 204508 / S288c) OX=559292 GN=CMC2 PE=1 SV=1
NaN	NaN	22.7797260284424	21.8203792572021	23.1423931121826	NaN	#VALUE!	#VALUE!	0.959347	1.94443	#VALUE!	#VALUE!			2	2	2	10.1	10.1	10.1	11.811	0	3.194	24.5234872986999	5	0	0	2	2	2	0	21.9385128332995	NaN	NaN	20.703706741333	18.2841014862061	20.92600440979	NaN	0	1.14068031311035	0	Q3E7A7	Q3E7A7	Uncharacterized protein YKL018C-A	YKL018C-A	sp|Q3E7A7|YK018_YEAST Uncharacterized protein YKL018C-A OS=Saccharomyces cerevisiae (strain ATCC 204508 / S288c) OX=559292 GN=YKL018C-A PE=1 SV=1
NaN	NaN	22.5460662841797	21.7575988769531	22.7048053741455	NaN	#VALUE!	#VALUE!	0.788467	1.72724	#VALUE!	#VALUE!			1	1	1	25.9	25.9	25.9	9.8814	0.001298	2.2261	24.2686373693705	1	0	0	1	1	1	0	22.268651645635	NaN	NaN	21.4103851318359	18.5592136383057	20.8418407440186	NaN	0	0.867836952209473	0	Q3E7B2	Q3E7B2	Cytochrome c oxidase assembly factor 3, mitochondrial	COA3	sp|Q3E7B2|COA3_YEAST Cytochrome c oxidase assembly factor 3, mitochondrial OS=Saccharomyces cerevisiae (strain ATCC 204508 / S288c) OX=559292 GN=COA3 PE=1 SV=1
NaN	NaN	NaN	21.8222484588623	21.9321098327637	21.8026638031006	#VALUE!	#VALUE!	#VALUE!	#VALUE!	0.129446	1.09387			1	1	1	27.8	27.8	27.8	8.2324	0	3.561	23.4182829423549	1	0	0	0	1	1	1	21.4182829423549	NaN	NaN	NaN	19.4041595458984	20.6385631561279	18.8614196777344	0	0.119653701782227	0	Q3E7C1	Q3E7C1	RNA polymerase II transcription factor B subunit 5	TFB5	sp|Q3E7C1|TFB5_YEAST General transcription and DNA repair factor IIH subunit TFB5 OS=Saccharomyces cerevisiae (strain ATCC 204508 / S288c) OX=559292 GN=TFB5 PE=1 SV=1
22.5104103088379	22.2701072692871	NaN	22.6701641082764	NaN	22.5097103118896	0.240303	1.18124	#VALUE!	#VALUE!	#VALUE!	#VALUE!			3	3	3	50	50	50	10.781	0	6.3391	24.8705129757099	8	1	2	0	2	0	3	22.0631909764862	21.3304119110107	18.6279544830322	NaN	19.0592555999756	NaN	19.5984344482422	0	0.0270830790201835	0	Q3E841	Q3E841	Uncharacterized protein YNR034W-A	YNR034W-A	sp|Q3E841|YN034_YEAST Uncharacterized protein YNR034W-A OS=Saccharomyces cerevisiae (strain ATCC 204508 / S288c) OX=559292 GN=YNR034W-A PE=1 SV=1
21.8733882904053	NaN	NaN	NaN	NaN	21.5467967987061	#VALUE!	#VALUE!	#VALUE!	#VALUE!	#VALUE!	#VALUE!			74	2	0	52.7	2	0	198.53	0	4.8206	23.1749786974103	4	0	1	0	0	0	2	16.9655588459491	16.3697166442871	NaN	NaN	NaN	NaN	15.4020462036133	0	0.326591491699219	0	Q92393	Q92393	Transposon Ty1-OR Gag-Pol polyprotein;Capsid protein;Ty1 protease;Integrase;Reverse transcriptase/ribonuclease H	TY1B-OR	sp|Q92393|YO12B_YEAST Transposon Ty1-OR Gag-Pol polyprotein OS=Saccharomyces cerevisiae (strain ATCC 204508 / S288c) OX=559292 GN=TY1B-OR PE=3 SV=1
NaN	NaN	21.1205387115479	NaN	20.9604911804199	NaN	#VALUE!	#VALUE!	#VALUE!	#VALUE!	#VALUE!	#VALUE!			4	4	4	6.7	6.7	6.7	102.25	0	13.663	24.751543241872	4	2	3	1	0	1	0	19.1969334488483	18.6555728912354	15.995457649231	16.0969829559326	NaN	15.6828298568726	NaN	0	NaN	0	Q99222	Q99222	ARF3-interacting protein 1	AFI1	sp|Q99222|AFI1_YEAST ARF3-interacting protein 1 OS=Saccharomyces cerevisiae (strain ATCC 204508 / S288c) OX=559292 GN=AFI1 PE=1 SV=1
22.9531021118164	NaN	NaN	NaN	NaN	NaN	#VALUE!	#VALUE!	#VALUE!	#VALUE!	#VALUE!	#VALUE!			4	4	4	8.6	8.6	8.6	71.729	0	3.4473	24.5749630228041	5	0	3	1	0	1	0	19.9899543403245	19.989953994751	NaN	NaN	NaN	NaN	NaN	0	NaN	0	Q99234	Q99234	Protein DFG16	DFG16	sp|Q99234|DFG16_YEAST Protein DFG16 OS=Saccharomyces cerevisiae (strain ATCC 204508 / S288c) OX=559292 GN=DFG16 PE=1 SV=1
22.2596015930176	NaN	23.3808650970459	21.5725135803223	23.3540706634521	NaN	#VALUE!	#VALUE!	1.80835	3.50242	#VALUE!	#VALUE!			2	2	2	4.6	4.6	4.6	68.014	0	16.369	25.4983228488423	7	0	2	2	1	2	0	20.640329678508	19.1558055877686	NaN	19.0566120147705	15.6313190460205	18.7933502197266	NaN	0	1.42566553751628	0	Q99252	Q99252	Protein ECM3	ECM3	sp|Q99252|ECM3_YEAST Protein ECM3 OS=Saccharomyces cerevisiae (strain ATCC 204508 / S288c) OX=559292 GN=ECM3 PE=1 SV=1
22.2082138061523	22.421573638916	NaN	NaN	NaN	NaN	-0.21336	0.862526	#VALUE!	#VALUE!	#VALUE!	#VALUE!			2	2	2	7.5	7.5	7.5	34.007	0	4.0816	24.2689228678211	4	2	2	0	0	0	0	20.1814386161467	19.6966114044189	18.3726272583008	NaN	NaN	NaN	NaN	0	-0.213359832763672	0	Q99297	Q99297	Mitochondrial 2-oxodicarboxylate carrier 2	ODC2	sp|Q99297|ODC2_YEAST Mitochondrial 2-oxodicarboxylate carrier 2 OS=Saccharomyces cerevisiae (strain ATCC 204508 / S288c) OX=559292 GN=ODC2 PE=1 SV=1
24.6664409637451	21.7400360107422	NaN	NaN	NaN	NaN	2.9264	7.60214	#VALUE!	#VALUE!	#VALUE!	#VALUE!			2	2	2	7.1	7.1	7.1	36.607	0	7.0397	26.4137230822226	2	1	2	0	0	0	0	23.0917949873352	23.0656585693359	17.2924842834473	NaN	NaN	NaN	NaN	0	2.92640495300293	0	Q99393	Q99393	ADIPOR-like receptor IZH4	IZH4	sp|Q99393|IZH4_YEAST ADIPOR-like receptor IZH4 OS=Saccharomyces cerevisiae (strain ATCC 204508 / S288c) OX=559292 GN=IZH4 PE=1 SV=1
24.881477355957	25.7337093353271	NaN	24.4966773986816	NaN	24.3603134155273	-0.852232	0.553927	#VALUE!	#VALUE!	#VALUE!	#VALUE!			4	4	4	39.7	39.7	39.7	14.395	0	21.37	27.5425195696014	16	3	3	0	2	0	4	24.5425048097423	23.7857646942139	22.6759452819824	NaN	19.5143165588379	NaN	21.2672805786133	0	0.0179106394449882	0	Q9P305	Q9P305	mRNA stability protein IGO2	IGO2	sp|Q9P305|IGO2_YEAST mRNA stability protein IGO2 OS=Saccharomyces cerevisiae (strain ATCC 204508 / S288c) OX=559292 GN=IGO2 PE=1 SV=3
29.5480995178223	28.167200088501	28.3435878753662	29.2348690032959	28.5119018554688	29.0030841827393	1.3809	2.60431	-0.891281	0.539135	-0.491182	0.711442			9	9	9	82.7	82.7	82.7	15.413	0	171.29	32.0217140779448	124	9	9	9	9	9	9	29.2143558470257	28.2975845336914	25.1682529449463	26.1534271240234	25.665843963623	26.0429763793945	25.7951850891113	0.000341844310028435	-0.000521341959636601	-0.00104908812113839	Q12305	Q12305	Thiosulfate sulfurtransferase RDL1, mitochondrial	RDL1	sp|Q12305|RDL1_YEAST Thiosulfate:glutathione sulfurtransferase OS=Saccharomyces cerevisiae (strain ATCC 204508 / S288c) OX=559292 GN=RDL1 PE=1 SV=1
28.114559173584	28.0913887023926	27.2174339294434	27.3138904571533	27.3428249359131	27.2728424072266	0.0231705	1.01619	-0.0964565	0.935327	0.0699825	1.0497			28	28	25	70.9	70.9	66.6	49.804	0	113.86	30.718736538144	130	22	22	18	16	19	18	26.0748599377354	24.9391670227051	23.5120754241943	23.1616477966309	21.8362636566162	23.0752239227295	22.129056930542	0.000928404488628848	-0.0011011759440116	-0.00284726749901514	P38755	P38755	Oxysterol-binding protein homolog 7	OSH7	sp|P38755|OSH7_YEAST Oxysterol-binding protein homolog 7 OS=Saccharomyces cerevisiae (strain ATCC 204508 / S288c) OX=559292 GN=OSH7 PE=1 SV=1
25.0960731506348	24.6605777740479	24.1496524810791	24.6449337005615	24.6149845123291	24.5513343811035	0.435495	1.35238	-0.495281	0.709423	0.0636501	1.04511			6	6	6	34.6	34.6	34.6	27.689	0	16.96	27.8604718093131	17	4	5	3	4	3	3	24.0530813655812	23.2439289093018	21.1718826293945	20.0286407470703	20.2339744567871	20.9531192779541	19.5672588348389	0.00152645269887942	0.00128809611002367	0.00467817812364569	P53915	P53915	Nicotinamide riboside kinase	NRK1	sp|P53915|NRK1_YEAST Nicotinamide riboside kinase OS=Saccharomyces cerevisiae (strain ATCC 204508 / S288c) OX=559292 GN=NRK1 PE=1 SV=1
27.3673629760742	27.4573249816895	26.1754093170166	26.1936454772949	26.3212051391602	26.222526550293	-0.089962	0.939547	-0.0182362	0.987439	0.0986786	1.07079			15	15	15	37.1	37.1	37.1	53.337	0	69.367	29.9159870281253	58	14	12	9	6	8	9	25.2720952333939	24.1626930236816	22.8024272918701	22.4757823944092	20.3744316101074	22.3970470428467	20.7046356201172	0.00184727903412161	-0.00317319234212476	-0.00565934946181142	P11914	P11914	Mitochondrial-processing peptidase subunit alpha	MAS2	sp|P11914|MPPA_YEAST Mitochondrial-processing peptidase subunit alpha OS=Saccharomyces cerevisiae (strain ATCC 204508 / S288c) OX=559292 GN=MAS2 PE=1 SV=1
26.0475788116455	25.5929183959961	25.5360260009766	25.6502323150635	25.7124290466309	26.0493259429932	0.45466	1.37046	-0.114206	0.92389	-0.336897	0.791742			11	11	11	33.9	33.9	33.9	55.923	0	131.66	28.7134855800982	48	7	7	7	6	7	8	23.9060978818081	22.4340267181396	20.5221939086914	21.5057182312012	20.3110790252686	21.2458591461182	20.765552520752	0.00186409445774346	0.00118573506673059	0.00571075564077965	Q08229	Q08229	Protein NBA1	NBA1	sp|Q08229|NBA1_YEAST Protein NBA1 OS=Saccharomyces cerevisiae (strain ATCC 204508 / S288c) OX=559292 GN=NBA1 PE=1 SV=1
21.937650680542	21.6832027435303	22.6558475494385	22.876407623291	22.6051921844482	22.6478137969971	0.254448	1.19288	-0.22056	0.858232	-0.0426216	0.970889			4	4	4	9.2	9.2	9.2	74.747	0	9.186	25.1821891294648	8	2	1	2	3	3	2	19.9343070891311	17.7662963867188	15.6315469741821	17.1352081298828	17.2779407501221	18.2959384918213	16.6588535308838	0.00219690423987843	-0.00291124979654711	-0.00672777809515454	P39682	P39682	Pre-mRNA-processing factor 39	PRP39	sp|P39682|PRP39_YEAST Pre-mRNA-processing factor 39 OS=Saccharomyces cerevisiae (strain ATCC 204508 / S288c) OX=559292 GN=PRP39 PE=1 SV=1
27.1089878082275	27.3734340667725	25.5605163574219	25.6356925964355	25.482837677002	25.1154117584229	-0.264446	0.832518	-0.0751762	0.949226	0.367426	1.29005			19	19	19	38	38	38	65.292	0	124.41	29.7901091221035	75	17	18	9	8	7	6	25.1462373919909	24.5676136016846	22.870813369751	20.9454956054688	19.3964462280273	20.3141803741455	19.1601715087891	0.00350788810090471	0.00926780700683594	0.0107264942199538	P32891	P32891	D-lactate dehydrogenase [cytochrome] 1, mitochondrial	DLD1	sp|P32891|DLD1_YEAST D-lactate dehydrogenase [cytochrome] 1, mitochondrial OS=Saccharomyces cerevisiae (strain ATCC 204508 / S288c) OX=559292 GN=DLD1 PE=1 SV=2
23.2326736450195	23.1410217285156	23.1233673095703	23.5514507293701	23.6888046264648	23.3605155944824	0.0916519	1.06559	-0.428083	0.743249	0.328289	1.25552			3	3	3	28	28	28	21.639	0	16.299	26.1912930048981	8	1	1	2	3	3	2	22.7318576206079	20.8873271942139	19.2234306335449	20.1731643676758	19.6920700073242	20.7314014434814	19.2964096069336	0.00423284381476444	-0.00271415710449219	-0.0129326373261132	P27882	P27882	Mitochondrial FAD-linked sulfhydryl oxidase ERV1	ERV1	sp|P27882|ERV1_YEAST Mitochondrial FAD-linked sulfhydryl oxidase ERV1 OS=Saccharomyces cerevisiae (strain ATCC 204508 / S288c) OX=559292 GN=ERV1 PE=1 SV=2
21.5853157043457	22.2135639190674	21.7720108032227	21.259313583374	21.9244823455811	21.7970924377441	-0.628248	0.646962	0.512697	1.42672	0.12739	1.09232			2	2	2	14.5	14.5	14.5	27.112	0	10.862	24.7492429853272	8	1	2	1	1	2	1	21.1642907160866	19.4474620819092	18.4538650512695	18.543327331543	16.7564258575439	19.2097206115723	17.4335536956787	0.00440756894992037	0.00394630432128906	0.0134638114304176	P40449	P40449	Uncharacterized protein YIL161W	YIL161W	sp|P40449|YIQ1_YEAST Uncharacterized protein YIL161W OS=Saccharomyces cerevisiae (strain ATCC 204508 / S288c) OX=559292 GN=YIL161W PE=1 SV=1
21.9083347320557	23.5202541351318	26.4700756072998	25.6328411102295	26.8711471557617	26.003246307373	-1.61192	0.327163	0.837234	1.78662	0.867901	1.82501			15	15	15	49	49	49	39.083	0	50.039	28.5839116480644	46	5	5	14	13	14	9	24.3359948913287	20.7126350402832	19.2281837463379	22.8448314666748	20.8203411102295	22.8876438140869	20.6963386535645	0.00575694632623653	0.0310719807942732	0.0175589768754272	P21560	P21560	Protein CBP3, mitochondrial	CBP3	sp|P21560|CBP3_YEAST Protein CBP3, mitochondrial OS=Saccharomyces cerevisiae (strain ATCC 204508 / S288c) OX=559292 GN=CBP3 PE=1 SV=1
22.6765041351318	22.4800548553467	23.0250282287598	23.4854202270508	23.7159671783447	23.478401184082	0.196449	1.14587	-0.460392	0.726789	0.237566	1.179			5	5	5	46.8	46.8	46.8	21.751	0	31.828	25.9445170846361	20	1	2	4	4	5	5	22.9445304889907	20.5290756225586	18.316370010376	20.6837177276611	19.9357471466064	21.2149562835693	20.0838165283203	0.00637385808622896	-0.00879224141438684	-0.0194270979166591	P25651	P25651	Monopolin complex subunit CSM1	CSM1	sp|P25651|CSM1_YEAST Monopolin complex subunit CSM1 OS=Saccharomyces cerevisiae (strain ATCC 204508 / S288c) OX=559292 GN=CSM1 PE=1 SV=1
28.1725025177002	28.3647785186768	27.2402725219727	27.2971038818359	27.3646106719971	27.0825347900391	-0.192276	0.875224	-0.0568314	0.961373	0.282076	1.21594			20	20	20	61.7	61.7	61.7	33.215	0	91.573	30.7112058575691	75	17	16	16	15	13	13	26.5413235314966	25.4181861877441	24.2993583679199	23.2979602813721	22.8485984802246	22.8536529541016	22.6833744049072	0.00732767478360569	0.0109895070393868	0.02231037950783	P38988	P38988	Mitochondrial GTP/GDP carrier protein 1	GGC1	sp|P38988|GGC1_YEAST Mitochondrial GTP/GDP carrier protein 1 OS=Saccharomyces cerevisiae (strain ATCC 204508 / S288c) OX=559292 GN=GGC1 PE=1 SV=1
22.3064975738525	NaN	22.9822101593018	23.1173725128174	23.1913681030273	22.5154972076416	#VALUE!	#VALUE!	-0.135162	0.910567	0.675871	1.59756			3	3	3	13.1	13.1	13.1	29.958	0	5.7877	25.6207279270555	11	0	2	3	2	3	1	22.0357710187066	20.3316688537598	NaN	20.1692543029785	18.4083137512207	20.2342090606689	17.7451095581055	0.00803500176732155	0.0102570851643868	0.0249402550754042	Q05779	Q05779	Ubiquinone biosynthesis protein COQ9, mitochondrial	COQ9	sp|Q05779|COQ9_YEAST Ubiquinone biosynthesis protein COQ9, mitochondrial OS=Saccharomyces cerevisiae (strain ATCC 204508 / S288c) OX=559292 GN=COQ9 PE=1 SV=1
27.3549785614014	27.326717376709	27.1926288604736	27.3232841491699	27.4015350341797	27.304084777832	0.0282612	1.01978	-0.130655	0.913416	0.0974503	1.06988			16	16	16	59.5	59.5	59.5	42.066	0	64.308	30.2563116798186	79	12	11	12	13	13	13	26.008384166375	24.4454383850098	23.1329669952393	23.6102046966553	22.3840312957764	23.4382209777832	22.4706287384033	0.00850694699939556	-0.00164794921875	-0.0258667671362576	P38071	P38071	Enoyl-[acyl-carrier protein] reductase [NADPH, B-specific], mitochondrial	ETR1	sp|P38071|ETR1_YEAST Enoyl-[acyl-carrier-protein] reductase, mitochondrial OS=Saccharomyces cerevisiae (strain ATCC 204508 / S288c) OX=559292 GN=ETR1 PE=1 SV=3
24.3634586334229	24.2648487091064	22.843297958374	22.8010063171387	22.5904655456543	22.7928695678711	0.0986099	1.07074	0.0422916	1.02975	-0.202404	0.869101			9	9	9	21.6	21.6	21.6	59.818	0	15.715	26.5548355488448	19	6	7	3	3	4	3	21.8544133917793	20.8579483032227	19.5962886810303	17.9784088134766	16.6088905334473	18.0068416595459	18.8634185791016	0.00913081507875705	-0.0205008188883475	-0.0277444551994423	P42073	P42073	RNA end formation protein 2	REF2	sp|P42073|REF2_YEAST RNA end formation protein 2 OS=Saccharomyces cerevisiae (strain ATCC 204508 / S288c) OX=559292 GN=REF2 PE=1 SV=2
25.4138355255127	25.2317657470703	25.1337909698486	25.1986541748047	24.9351253509521	25.0650081634521	0.18207	1.13451	-0.0648632	0.956036	-0.129883	0.913906			10	10	10	23.3	23.3	23.3	57.025	0	14.464	28.2979782169836	29	7	9	4	6	6	8	23.439997221856	22.4468269348145	20.5460433959961	20.3302478790283	19.640064239502	20.123384475708	19.7046356201172	0.00940417513495791	-0.00422541300455848	-0.0285663896043241	P25382	P25382	Ribosome assembly protein 4	RSA4	sp|P25382|NLE1_YEAST Ribosome assembly protein 4 OS=Saccharomyces cerevisiae (strain ATCC 204508 / S288c) OX=559292 GN=RSA4 PE=1 SV=3
21.2552852630615	21.2288780212402	22.696382522583	23.2781009674072	23.2199573516846	22.7379550933838	0.0264072	1.01847	-0.581718	0.668167	0.482002	1.39668			2	2	2	25.6	25.6	25.6	9.1794	0.00026096	2.365	25.3059125583627	5	1	2	2	2	2	2	22.7209431015252	20.3280563354492	18.1187782287598	20.5723743438721	19.9771518707275	20.7268371582031	19.9108028411865	0.00947429623259827	-0.024436314900715	-0.0287771490325791	Q9URQ5	Q9URQ5	High temperature lethal protein 1	HTL1	sp|Q9URQ5|HTL1_YEAST High temperature lethal protein 1 OS=Saccharomyces cerevisiae (strain ATCC 204508 / S288c) OX=559292 GN=HTL1 PE=1 SV=1
22.7997817993164	22.4596900939941	22.0427665710449	21.9965553283691	21.8012828826904	NaN	0.340092	1.26584	0.0462112	1.03255	#VALUE!	#VALUE!			4	4	4	24.3	24.3	24.3	16.123	0	6.9122	25.5032453792951	7	1	3	2	1	2	0	22.3333082441177	21.6641845703125	19.197244644165	19.6305694580078	16.958553314209	18.6833915710449	NaN	0.010270003494986	-0.0135122934977225	-0.0317987079704175	Q06090	Q06090	54S ribosomal protein L51, mitochondrial	MRPL51	sp|Q06090|RM51_YEAST 54S ribosomal protein L51, mitochondrial OS=Saccharomyces cerevisiae (strain ATCC 204508 / S288c) OX=559292 GN=MRPL51 PE=1 SV=1
26.6010208129883	27.4837760925293	27.6000995635986	27.2418174743652	27.6510944366455	27.1599063873291	-0.882755	0.542331	0.358282	1.2819	0.491188	1.4056			30	30	30	25.3	25.3	25.3	188.57	0	153.42	30.2613649075449	82	18	17	23	19	19	20	24.1116368444922	22.3073863983154	21.3430500030518	22.114387512207	20.1650886535645	21.4629878997803	20.6712436676025	0.0102873440945254	-0.0110950469970703	-0.0312185220657894	P52593	P52593	Nucleoporin NUP188	NUP188	sp|P52593|NU188_YEAST Nucleoporin NUP188 OS=Saccharomyces cerevisiae (strain ATCC 204508 / S288c) OX=559292 GN=NUP188 PE=1 SV=1
20.940055847168	20.4100742340088	24.1995544433594	24.5338001251221	23.5468673706055	23.5887508392334	0.529982	1.44391	-0.334246	0.793199	-0.0418835	0.971386			2	2	2	34.8	34.8	34.8	7.7286	0	6.3034	26.1596945999488	7	2	2	1	1	1	1	23.8377857501046	20.7467346191406	19.3497047424316	22.3485164642334	21.4086246490479	21.441822052002	20.6028614044189	0.0105924593621994	0.0512841542561837	0.0321335846681288	Q3E7Z5	Q3E7Z5	Uncharacterized protein YIL002W-A	YIL002W-A	sp|Q3E7Z5|YI002_YEAST Uncharacterized protein YIL002W-A OS=Saccharomyces cerevisiae (strain ATCC 204508 / S288c) OX=559292 GN=YIL002W-A PE=1 SV=1
25.720775604248	25.5807247161865	25.0405521392822	25.1698970794678	25.0750846862793	25.1118354797363	0.140051	1.10194	-0.129345	0.914246	-0.0367508	0.974848			10	10	10	27.3	27.3	27.3	26.901	0	21.826	28.4225397491825	36	9	8	4	4	4	5	25.6151808171826	24.5936603546143	23.1042804718018	22.4499530792236	21.3757591247559	22.1480846405029	21.9179801940918	0.0107639873203205	-0.00868161519368726	-0.0326477418039345	P40007	P40007	Nucleolar protein 16	NOP16	sp|P40007|NOP16_YEAST Nucleolar protein 16 OS=Saccharomyces cerevisiae (strain ATCC 204508 / S288c) OX=559292 GN=NOP16 PE=1 SV=1
30.5218753814697	30.7474327087402	29.4656372070313	29.247013092041	29.4609413146973	29.3939075469971	-0.225557	0.855265	0.218624	1.16362	0.0670338	1.04756			12	12	12	76.4	76.4	76.4	25.774	0	193.26	33.1263715843254	91	12	12	11	11	10	10	29.6669553522195	28.6873912811279	27.2426357269287	26.5719299316406	24.8720169067383	26.2740516662598	25.5668869018555	0.011128448980867	0.0200335184733085	0.0337395821197361	P00447	P00447	Superoxide dismutase [Mn], mitochondrial	SOD2	sp|P00447|SODM_YEAST Superoxide dismutase [Mn], mitochondrial OS=Saccharomyces cerevisiae (strain ATCC 204508 / S288c) OX=559292 GN=SOD2 PE=1 SV=1
25.1580772399902	24.8525772094727	24.3052864074707	24.5186328887939	24.632396697998	NaN	0.3055	1.23585	-0.213346	0.862534	#VALUE!	#VALUE!			4	4	4	8.9	8.9	8.9	57.708	0	4.5598	27.1080908158731	8	1	2	2	2	3	0	23.0205920713546	20.0873184204102	17.5559215545654	21.0227603912354	21.1189556121826	21.4142627716064	NaN	0.0122149151707134	0.0129817326863595	0.0377399162432523	P06784	P06784	Serine/threonine-protein kinase STE7	STE7	sp|P06784|STE7_YEAST Serine/threonine-protein kinase STE7 OS=Saccharomyces cerevisiae (strain ATCC 204508 / S288c) OX=559292 GN=STE7 PE=1 SV=1
22.1082420349121	22.387113571167	24.4970436096191	23.6844234466553	24.2992897033691	24.7187919616699	-0.278872	0.824235	0.81262	1.7564	-0.419502	0.747683			80	1	0	55.7	1.2	0	198.57	0	19.478	26.5768667332728	9	1	1	1	1	1	1	20.4069647917068	16.5688610076904	16.6444187164307	18.8607845306396	16.7749423980713	18.4076900482178	17.95849609375	0.0123279230648171	0.0380821228027344	0.0373268201691492	Q12414;P0C2I5	Q12414;P0C2I5	Transposon Ty1-PL Gag-Pol polyprotein;Capsid protein;Ty1 protease;Integrase;Reverse transcriptase/ribonuclease H;Transposon Ty1-LR2 Gag-Pol polyprotein;Capsid protein;Ty1 protease;Integrase;Reverse transcriptase/ribonuclease H	TY1B-PL;TY1B-LR2	sp|Q12414|YP11B_YEAST Transposon Ty1-PL Gag-Pol polyprotein OS=Saccharomyces cerevisiae (strain ATCC 204508 / S288c) OX=559292 GN=TY1B-PL PE=3 SV=1;sp|P0C2I5|YL12B_YEAST Transposon Ty1-LR2 Gag-Pol polyprotein OS=Saccharomyces cerevisiae (strain ATCC 204508
27.93994140625	28.52760887146	26.5339488983154	26.0339965820313	26.4730377197266	26.4915351867676	-0.587667	0.665418	0.499952	1.41417	-0.0184975	0.98726			10	10	10	36.9	36.9	36.9	34.184	0	167.61	30.5101299592715	37	9	9	2	5	5	7	26.7027939057151	25.7812671661377	24.9535369873047	22.2102966308594	21.1068687438965	22.8541088104248	22.0610160827637	0.0129454315113945	-0.0354042053222656	-0.0391699578701539	Q04013	Q04013	Citrate/oxoglutarate carrier protein	YHM2	sp|Q04013|YHM2_YEAST Citrate/oxoglutarate carrier protein OS=Saccharomyces cerevisiae (strain ATCC 204508 / S288c) OX=559292 GN=YHM2 PE=1 SV=1
22.2653350830078	22.4123764038086	23.2847499847412	23.1014766693115	22.6653137207031	NaN	-0.147041	0.903101	0.183273	1.13546	#VALUE!	#VALUE!			3	3	3	9.6	9.6	9.6	49.654	0	5.0978	25.7516964619845	4	2	3	2	1	1	0	21.4297683670971	20.2798004150391	18.3007717132568	19.5307331085205	17.652494430542	18.0183525085449	NaN	0.0129715050071464	-0.0184602737426758	-0.0400443886106677	P53752;P25606	P53752	Uncharacterized membrane glycoprotein YNR066C		sp|P53752|YN95_YEAST Uncharacterized membrane glycoprotein YNR066C OS=Saccharomyces cerevisiae (strain ATCC 204508 / S288c) OX=559292 GN=YNR066C PE=4 SV=1
25.8717823028564	26.6328411102295	24.6669826507568	24.5742702484131	24.7994651794434	24.2421264648438	-0.761059	0.590063	0.0927124	1.06637	0.557339	1.47155			10	10	10	55.8	55.8	55.8	23.365	0	49.814	28.5908866460426	27	8	7	6	4	5	4	25.2689585511553	24.1912174224854	23.3194828033447	22.1481781005859	20.1423320770264	21.9616222381592	19.8087310791016	0.0145952825018677	-0.0370025634765625	-0.0440824268162238	P08067	P08067	Cytochrome b-c1 complex subunit Rieske, mitochondrial	RIP1	sp|P08067|UCRI_YEAST Cytochrome b-c1 complex subunit Rieske, mitochondrial OS=Saccharomyces cerevisiae (strain ATCC 204508 / S288c) OX=559292 GN=RIP1 PE=1 SV=1
25.300651550293	25.9178428649902	25.9201393127441	25.7345638275146	25.9868507385254	25.5224704742432	-0.617191	0.651939	0.185575	1.13727	0.46438	1.37972			21	21	19	28.5	28.5	26.2	93.275	0	48.148	28.7825992070981	63	13	17	14	11	14	9	23.2280259766954	21.6771926879883	20.1774291992188	21.086540222168	19.2096729278564	20.865140914917	19.0495300292969	0.0146688145790481	0.0109214782714844	0.0443009659254569	P40341	P40341	Mitochondrial respiratory chain complexes assembly protein YTA12	YTA12	sp|P40341|YTA12_YEAST Mitochondrial respiratory chain complexes assembly protein YTA12 OS=Saccharomyces cerevisiae (strain ATCC 204508 / S288c) OX=559292 GN=YTA12 PE=1 SV=2
22.720630645752	22.8114318847656	22.2325706481934	21.9644451141357	22.1572437286377	NaN	-0.0908012	0.939001	0.268126	1.20424	#VALUE!	#VALUE!			8	8	8	7.7	7.7	7.7	161.6	0	8.8945	25.6600877541765	13	5	5	2	1	4	0	19.7293618445023	19.0834541320801	17.0833759307861	16.1656131744385	12.4226169586182	16.5483703613281	NaN	0.0148301592026982	-0.0177901585896798	-0.0456898173824081	P38904	P38904	Protein SPP41	SPP41	sp|P38904|SPP41_YEAST Protein SPP41 OS=Saccharomyces cerevisiae (strain ATCC 204508 / S288c) OX=559292 GN=SPP41 PE=1 SV=2
22.8729000091553	23.0167045593262	23.6599235534668	23.6587257385254	23.5911502838135	23.4911823272705	-0.143805	0.905129	0.00119781	1.00083	0.099968	1.07175			5	5	5	34	34	34	23.424	0	14.034	26.1270342874047	17	3	1	3	4	4	4	22.6676105430741	19.9645156860352	19.4334297180176	20.8777751922607	19.8621768951416	20.4393882751465	19.263801574707	0.0148629658304609	-0.0142129262288435	-0.0448778230692673	Q03201	Q03201	37S ribosomal protein S10, mitochondrial	RSM10	sp|Q03201|RT10_YEAST 37S ribosomal protein S10, mitochondrial OS=Saccharomyces cerevisiae (strain ATCC 204508 / S288c) OX=559292 GN=RSM10 PE=1 SV=1
25.6825504302979	26.1985988616943	26.9219570159912	26.5539722442627	26.9442481994629	26.8580417633057	-0.516048	0.699285	0.367985	1.29055	0.0862064	1.06158			18	18	18	59.4	59.4	59.4	38.203	0	100.96	29.5015760322988	72	10	15	14	12	13	11	25.1092472209762	23.0926342010498	21.6847019195557	23.3150653839111	21.4552307128906	22.8611125946045	21.4918441772461	0.014898001752442	-0.0206190745035819	-0.0449818954036435	P38629	P38629	Replication factor C subunit 3	RFC3	sp|P38629|RFC3_YEAST Replication factor C subunit 3 OS=Saccharomyces cerevisiae (strain ATCC 204508 / S288c) OX=559292 GN=RFC3 PE=1 SV=1
24.9229774475098	24.5580654144287	23.9771862030029	24.4077548980713	24.2027702331543	24.1793441772461	0.364912	1.2878	-0.430569	0.741969	0.0234261	1.01637			7	7	7	18.9	18.9	18.9	57.556	0	24.57	27.751939027221	15	4	6	2	2	3	3	23.8450803450551	23.1537094116211	20.6472854614258	20.3211345672607	19.2808208465576	20.4648323059082	19.4177570343018	0.0152563256581766	-0.014076868693035	-0.0460458306975522	Q08831	Q08831	Protein VTS1	VTS1	sp|Q08831|VTS1_YEAST RNA-binding protein VTS1 OS=Saccharomyces cerevisiae (strain ATCC 204508 / S288c) OX=559292 GN=VTS1 PE=1 SV=1
23.9312973022461	22.8274917602539	23.1851940155029	24.0990867614746	23.8534812927246	23.9764881134033	1.10381	2.14921	-0.913893	0.530751	-0.123007	0.918272			6	6	6	25.1	25.1	25.1	40.471	0	4.8705	26.355247577535	9	3	2	5	6	6	5	21.7702783545511	18.9269733428955	17.2770328521729	19.6267433166504	19.0949897766113	20.0075798034668	18.9201850891113	0.0157596542048975	0.0223019917805978	0.0475389421344603	P12887	P12887	Uracil-DNA glycosylase	UNG1	sp|P12887|UNG_YEAST Uracil-DNA glycosylase OS=Saccharomyces cerevisiae (strain ATCC 204508 / S288c) OX=559292 GN=UNG1 PE=1 SV=1
26.1664524078369	26.4515514373779	26.1098251342773	25.796968460083	25.4973793029785	25.4729290008545	-0.285099	0.820685	0.312857	1.24216	0.0244503	1.01709			8	8	8	6.6	6.6	6.6	211.11	0	10.047	28.1230720013577	14	1	2	5	3	5	4	21.5995060973031	16.7230739593506	14.8108224868774	16.528636932373	19.7100963592529	19.4013080596924	20.412971496582	0.0160851923477187	0.0174026489257813	0.0485037918547367	P0CX14;P0CX15;P53819;P0CX22;P0CX21;P0CX20;P40889;P40434;P40105;O13559;Q03099;Q99208;Q07888;Q3E7X8;Q08995;Q3E7Y5;P38899;P43538;O13556;Q7M4S9;P38721;P38900;P38722;Q08993;P39971;P0CX17;P0CX16;P43540	P0CX14;P0CX15;P53819;P0CX22;P0CX21;P0CX20;P40889;P40434;P40105;O13559;Q03099;Q99208;Q07888;Q3E7X8;Q08995;Q3E7Y5;P38899	Y element ATP-dependent helicase protein 1 copy 3;Y element ATP-dependent helicase protein 1 copy 7;Y element ATP-dependent helicase protein 1 copy 6;Y element ATP-dependent helicase protein 1 copy 8;Y element ATP-dependent helicase protein 1 copy 5;Y element ATP-dependent helicase protein 1 copy 1;Y element ATP-dependent helicase YJL225C;Y element ATP-dependent helicase YIL177C;Y element ATP-dep…	YRF1-3;YRF1-7;YRF1-6;YRF1-8;YRF1-5;YRF1-1;YIL177C;YRF1-2;YRF1-4;YEL077C;YPR204W;YBL111C;YHR218W	sp|P0CX14|YRF13_YEAST Y element ATP-dependent helicase protein 1 copy 3 OS=Saccharomyces cerevisiae (strain ATCC 204508 / S288c) OX=559292 GN=YRF1-3 PE=2 SV=1;sp|P0CX15|YRF17_YEAST Y element ATP-dependent helicase protein 1 copy 7 OS=Saccharomyces cerevi
24.0122261047363	23.8410530090332	23.5518035888672	23.9079322814941	24.3674640655518	24.2211074829102	0.171173	1.12597	-0.356129	0.781258	0.146357	1.10677			8	8	8	18.5	18.5	18.5	75.946	0	19.232	26.896660194115	19	3	6	5	3	4	4	21.7674118180629	20.2844409942627	17.635591506958	19.267463684082	17.771785736084	19.1872272491455	19.2814311981201	0.0161902380599459	-0.0128663380940779	-0.0488149903851763	Q12033	Q12033	pH-response regulator protein palA/RIM20	RIM20	sp|Q12033|PALA_YEAST pH-response regulator protein palA/RIM20 OS=Saccharomyces cerevisiae (strain ATCC 204508 / S288c) OX=559292 GN=RIM20 PE=1 SV=1
23.9305763244629	23.8998432159424	24.0912780761719	24.2708492279053	24.326150894165	24.2040405273438	0.0307331	1.02153	-0.179571	0.882965	0.12211	1.08833			6	6	6	22.6	22.6	22.6	37.393	0	15.97	26.9757440819634	35	6	5	6	5	6	6	22.8058343840697	20.8535385131836	19.5959053039551	20.5209484100342	19.3774433135986	20.7323951721191	19.4526195526123	0.0182867172783166	-0.00890922546386719	-0.0550113848547724	Q03976	Q03976	37S ribosomal protein S24, mitochondrial	RSM24	sp|Q03976|RT24_YEAST 37S ribosomal protein S24, mitochondrial OS=Saccharomyces cerevisiae (strain ATCC 204508 / S288c) OX=559292 GN=RSM24 PE=1 SV=1
25.0616760253906	25.1723022460938	25.3762016296387	25.3541049957275	25.4293727874756	25.3197231292725	-0.110626	0.926186	0.0220966	1.01543	0.10965	1.07897			16	16	16	34.5	34.5	34.5	69.633	0	39.547	28.4484504601454	47	9	10	10	8	8	11	23.4040563407869	22.4007244110107	20.038854598999	20.6570911407471	19.3234462738037	20.4003086090088	19.595287322998	0.0183461757271613	0.00704002380371094	0.0551867225487967	Q08822	Q08822	Probable electron transfer flavoprotein-ubiquinone oxidoreductase, mitochondrial	CIR2	sp|Q08822|ETFD_YEAST Probable electron transfer flavoprotein-ubiquinone oxidoreductase, mitochondrial OS=Saccharomyces cerevisiae (strain ATCC 204508 / S288c) OX=559292 GN=CIR2 PE=1 SV=1
24.5956535339355	24.8719711303711	24.0971584320068	24.3757057189941	24.6197490692139	24.1130695343018	-0.276318	0.825696	-0.278547	0.824421	0.50668	1.42078			7	7	7	23.8	23.8	23.8	44.924	0	23.183	27.8063040694008	19	5	7	6	5	5	6	23.6363298934154	22.8845539093018	20.240629196167	20.6451759338379	19.1770153045654	20.2947959899902	19.036657333374	0.0190700135112418	-0.0160617828369141	-0.0573195038396712	P48412	P48412	Nonsense-mediated mRNA decay protein 3	UPF3	sp|P48412|UPF3_YEAST Nonsense-mediated mRNA decay protein 3 OS=Saccharomyces cerevisiae (strain ATCC 204508 / S288c) OX=559292 GN=UPF3 PE=1 SV=1
25.7101459503174	25.7300853729248	23.7987728118896	25.397216796875	24.1630001068115	22.7398300170898	-0.0199394	0.986274	-1.59844	0.330233	1.42317	2.68174			9	9	9	24.2	24.2	24.2	50.481	0	19.598	28.1345249479818	20	7	7	3	4	2	2	24.0471012739479	23.1598014831543	22.4376888275146	19.3355560302734	19.9983806610107	18.8536758422852	16.590425491333	0.0194608993494589	-0.0650711059570313	-0.0584699024814481	P36080	P36080	Ribosomal RNA-processing protein 14	RRP14	sp|P36080|RRP14_YEAST Ribosomal RNA-processing protein 14 OS=Saccharomyces cerevisiae (strain ATCC 204508 / S288c) OX=559292 GN=RRP14 PE=1 SV=1
27.4109439849854	25.7639007568359	24.1866912841797	25.1926097869873	24.3496913909912	25.178129196167	1.64704	3.13191	-1.00592	0.497953	-0.828438	0.563139			19	19	19	49.6	49.6	49.6	51.16	0	139.5	29.4743102742771	56	16	19	3	7	7	9	24.9507367123945	24.6505870819092	21.6332950592041	18.7440910339355	19.1395111083984	19.5567455291748	20.0023708343506	0.0194912345770174	-0.0624376932779924	-0.0585591414608278	P38753	P38753	Class E vacuolar protein-sorting machinery protein HSE1	HSE1	sp|P38753|HSE1_YEAST Class E vacuolar protein-sorting machinery protein HSE1 OS=Saccharomyces cerevisiae (strain ATCC 204508 / S288c) OX=559292 GN=HSE1 PE=1 SV=1
27.9656524658203	28.1590404510498	27.543478012085	27.6975002288818	27.7249450683594	27.4222984313965	-0.193388	0.87455	-0.154022	0.898741	0.302647	1.23341			18	18	18	44.6	44.6	44.6	66.421	0	163.31	30.7814427631198	98	15	16	14	14	13	14	26.0265646412577	24.6504230499268	23.1948127746582	23.6206436157227	22.1037368774414	23.1231632232666	22.4872627258301	0.020097507477058	-0.0149211883544922	-0.0603414678331418	P52893	P52893	Probable alanine aminotransferase, mitochondrial	ALT1	sp|P52893|ALAM_YEAST Probable alanine aminotransferase, mitochondrial OS=Saccharomyces cerevisiae (strain ATCC 204508 / S288c) OX=559292 GN=ALT1 PE=1 SV=1
28.0151538848877	27.8801116943359	27.0153141021729	27.0800952911377	27.0744934082031	27.2207584381104	0.135042	1.09812	-0.0647812	0.95609	-0.146265	0.903587			9	9	9	47.9	47.9	47.9	29.495	0	84.77	30.6352991473803	63	8	8	7	8	6	8	26.7284518025637	25.8137226104736	24.1110000610352	23.5321960449219	22.2981567382813	23.2516345977783	22.6994132995605	0.0207434554615527	-0.0253346761067696	-0.0622379587034364	P34227	P34227	Mitochondrial peroxiredoxin PRX1	PRX1	sp|P34227|PRX1_YEAST Peroxiredoxin PRX1, mitochondrial OS=Saccharomyces cerevisiae (strain ATCC 204508 / S288c) OX=559292 GN=PRX1 PE=1 SV=1
28.1826248168945	26.6408596038818	24.4782772064209	25.1136646270752	24.7840671539307	25.4515190124512	1.54177	2.91151	-0.635387	0.643768	-0.667452	0.629618			31	31	31	33.4	33.4	33.4	138.01	0	170.06	30.0608515862691	80	20	30	9	8	9	12	24.1301412989847	23.8140163421631	20.8190937042236	18.1159381866455	18.559362411499	18.3372993469238	19.5381813049316	0.0208331158113025	0.0796419779459647	0.0625009987804147	Q02979	Q02979	Glycerophosphodiester phosphodiesterase GDE1	GDE1	sp|Q02979|GDE1_YEAST Glycerophosphocholine phosphodiesterase GDE1 OS=Saccharomyces cerevisiae (strain ATCC 204508 / S288c) OX=559292 GN=GDE1 PE=1 SV=1
28.2067623138428	27.9987335205078	26.0560207366943	26.3615856170654	26.1632308959961	26.2377586364746	0.208029	1.15511	-0.305565	0.809125	-0.0745277	0.949653			74	74	74	24.7	24.7	24.7	433.17	0	157.9	30.498193482016	147	57	62	21	23	25	20	22.7500305970988	22.0788745880127	20.3729457855225	18.7828960418701	17.6889324188232	18.4537448883057	17.9013614654541	0.0212291472857679	-0.0573546091715507	-0.0636622672124651	P38811	P38811	Transcription-associated protein 1	TRA1	sp|P38811|TRA1_YEAST Transcription-associated protein 1 OS=Saccharomyces cerevisiae (strain ATCC 204508 / S288c) OX=559292 GN=TRA1 PE=1 SV=1
25.4974098205566	24.6949806213379	22.5939102172852	23.9983463287354	23.6204204559326	23.2015151977539	0.802429	1.74404	-1.40444	0.377766	0.418905	1.33691			6	6	6	24.7	24.7	24.7	41.215	0	9.8833	27.4191674640474	10	5	6	1	3	2	2	22.9597663919255	22.1448230743408	20.6375904083252	17.5019931793213	18.9810600280762	19.379581451416	18.9435787200928	0.021352677703889	-0.061033884684246	-0.0640242960959444	Q03430	Q03430	37S ribosomal protein RSM28, mitochondrial	RSM28	sp|Q03430|RSM28_YEAST 37S ribosomal protein RSM28, mitochondrial OS=Saccharomyces cerevisiae (strain ATCC 204508 / S288c) OX=559292 GN=RSM28 PE=1 SV=2
26.2350940704346	26.1709480285645	25.6603870391846	25.8073978424072	25.8423004150391	25.8002796173096	0.064146	1.04547	-0.147011	0.90312	0.0420208	1.02955			11	11	11	45.2	45.2	45.2	39.406	0	50.933	28.962952737128	34	5	9	9	9	8	8	24.8754898958777	23.4930171966553	21.2277030944824	22.7374591827393	21.2453956604004	22.2017688751221	21.0790061950684	0.0217197452411902	-0.0136146545410156	-0.0650995104258276	P36151	P36151	Uncharacterized protein YKR070W	YKR070W	sp|P36151|YK50_YEAST Uncharacterized protein YKR070W OS=Saccharomyces cerevisiae (strain ATCC 204508 / S288c) OX=559292 GN=YKR070W PE=1 SV=1
21.810920715332	21.6083316802979	21.6401081085205	22.3352718353271	22.2015590667725	21.7630405426025	0.202589	1.15076	-0.695164	0.617639	0.438519	1.35521			3	3	3	8.7	8.7	8.7	55.588	0	9.5126	24.9831146889021	13	2	2	2	2	3	3	20.2282315369161	19.0026454925537	15.1275510787964	16.958438873291	16.6069107055664	18.1888198852539	17.1081981658936	0.0217372960363192	-0.0180187225341797	-0.0651508997992864	Q06668	Q06668	Methyltransferase OMS1, mitochondrial	OMS1	sp|Q06668|OMS1_YEAST Methyltransferase OMS1, mitochondrial OS=Saccharomyces cerevisiae (strain ATCC 204508 / S288c) OX=559292 GN=OMS1 PE=1 SV=1
25.0715293884277	25.55739402771	25.280969619751	25.0614700317383	25.4217529296875	25.1186637878418	-0.485865	0.714069	0.2195	1.16433	0.303089	1.23378			2	2	2	19.8	19.8	19.8	11.312	0	4.2759	28.2196502315379	16	2	2	2	2	2	2	25.6346969616724	24.0205574035645	23.0398921966553	23.2233047485352	21.6633605957031	23.1503963470459	21.942813873291	0.0218684915441614	0.0122413635253906	0.0655349861070736	Q06405	Q06405	ATP synthase subunit f, mitochondrial	ATP17	sp|Q06405|ATPK_YEAST ATP synthase subunit f, mitochondrial OS=Saccharomyces cerevisiae (strain ATCC 204508 / S288c) OX=559292 GN=ATP17 PE=1 SV=1
27.6267967224121	28.0406150817871	27.4967079162598	27.4578723907471	27.6082305908203	27.2792339324951	-0.413818	0.750634	0.0388355	1.02728	0.328997	1.25614			22	22	22	31.2	31.2	31.2	75.105	0	80.916	30.6065552487823	114	18	17	14	13	13	15	25.7991685586696	24.4553813934326	23.5048217773438	22.9860000610352	21.9923076629639	22.76291847229	21.8889255523682	0.0219126203387196	-0.0153287251790388	-0.0656641536413883	Q04373	Q04373	Pumilio homology domain family member 6	PUF6	sp|Q04373|PUF6_YEAST Pumilio homology domain family member 6 OS=Saccharomyces cerevisiae (strain ATCC 204508 / S288c) OX=559292 GN=PUF6 PE=1 SV=1
27.1253395080566	27.3106861114502	26.3716239929199	26.3849716186523	26.7579898834229	26.4867095947266	-0.185347	0.879438	-0.0133476	0.990791	0.27128	1.20688			12	12	12	39.8	39.8	39.8	39.598	0	36.882	29.7447404940031	58	7	10	5	7	7	6	26.1597715785813	24.7118263244629	24.4076900482178	22.815502166748	22.2648487091064	23.0251617431641	22.0276622772217	0.0221236801393584	0.0241953531901018	0.0662817753712955	P36160	P36160	Ribosome biogenesis protein RPF2	RPF2	sp|P36160|RPF2_YEAST Ribosome biogenesis protein RPF2 OS=Saccharomyces cerevisiae (strain ATCC 204508 / S288c) OX=559292 GN=RPF2 PE=1 SV=1
24.2755451202393	24.6965198516846	25.5193843841553	25.4037322998047	25.6119766235352	25.4044780731201	-0.420975	0.74692	0.115652	1.08346	0.207499	1.15468			9	9	9	43.2	43.2	43.2	44.536	0	59.648	28.010306478506	36	5	5	5	4	5	5	23.4867712032025	21.2007217407227	20.3026256561279	21.3402805328369	19.8801689147949	21.4695606231689	20.5426464080811	0.0221584570838075	-0.0326080322265625	-0.0663835169418664	P36046	P36046	Mitochondrial intermembrane space import and assembly protein 40	MIA40	sp|P36046|MIA40_YEAST Mitochondrial intermembrane space import and assembly protein 40 OS=Saccharomyces cerevisiae (strain ATCC 204508 / S288c) OX=559292 GN=MIA40 PE=1 SV=2
29.8532314300537	30.0123863220215	23.9550018310547	23.9436893463135	24.1708145141602	24.5680770874023	-0.159155	0.89555	0.0113125	1.00787	-0.397263	0.759298			39	39	39	54.3	54.3	54.3	94.868	0	221.66	31.8232763392263	113	36	32	7	4	8	7	26.2085862381578	25.6444110870361	24.2185974121094	20.2784404754639	19.9888458251953	19.9347381591797	21.1092319488525	0.0222320872351686	-0.18170166015625	-0.0665989013281957	Q01217	Q01217	Protein ARG5,6, mitochondrial;N-acetyl-gamma-glutamyl-phosphate reductase;Acetylglutamate kinase	ARG5,6	sp|Q01217|ARG56_YEAST Protein ARG5,6, mitochondrial OS=Saccharomyces cerevisiae (strain ATCC 204508 / S288c) OX=559292 GN=ARG5,6 PE=1 SV=1
25.2298603057861	25.582592010498	25.2663879394531	25.3704929351807	25.3727855682373	24.9538478851318	-0.352732	0.7831	-0.104105	0.930382	0.418938	1.33694			10	10	10	39.5	39.5	39.5	39.172	0	26.403	28.4279829816719	45	7	10	7	6	7	8	24.3405520987549	23.1384773254395	21.5462779998779	21.7535648345947	20.1054630279541	21.6238174438477	20.0047035217285	0.022244161353545	-0.012633005777996	-0.06663421766286	Q99288	Q99288	Broad-range acid phosphatase DET1	DET1	sp|Q99288|DET1_YEAST Broad-range acid phosphatase DET1 OS=Saccharomyces cerevisiae (strain ATCC 204508 / S288c) OX=559292 GN=DET1 PE=1 SV=1
22.9383163452148	24.171501159668	24.4029502868652	23.1570739746094	24.4347896575928	24.3231983184814	-1.23318	0.425377	1.24588	2.37163	0.111591	1.08042			2	2	2	12.7	12.7	12.7	16.745	0	7.1725	27.0604393287893	10	2	2	2	1	1	1	24.0604393287893	22.2692222595215	21.5766716003418	22.44846534729	18.698392868042	21.0103149414063	20.0038795471191	0.0225108780073579	0.0414276123046875	0.0674141298785202	Q07648	Q07648	D-tyrosyl-tRNA(Tyr) deacylase	DTD1	sp|Q07648|DTD_YEAST D-aminoacyl-tRNA deacylase OS=Saccharomyces cerevisiae (strain ATCC 204508 / S288c) OX=559292 GN=DTD1 PE=1 SV=1
27.0570335388184	27.255298614502	26.4569797515869	26.2367000579834	26.2763977050781	26.2126178741455	-0.198265	0.871598	0.22028	1.16496	0.0637798	1.0452			28	28	28	36.7	36.7	36.7	129.46	0	85.481	29.7784379298734	98	18	20	16	19	18	18	24.0505096420477	22.9406108856201	21.2140674591064	21.357458114624	19.9211292266846	21.0757446289063	19.9350261688232	0.0229199638379189	0.0285981496175118	0.068609516281962	P22276	P22276	DNA-directed RNA polymerase III subunit RPC2	RET1	sp|P22276|RPC2_YEAST DNA-directed RNA polymerase III subunit RPC2 OS=Saccharomyces cerevisiae (strain ATCC 204508 / S288c) OX=559292 GN=RET1 PE=1 SV=2
22.0566577911377	22.4760284423828	22.0918102264404	21.7386341094971	21.9340190887451	21.9154281616211	-0.419371	0.747751	0.353176	1.27737	0.0185909	1.01297			4	4	4	11.1	11.1	11.1	54.367	0	7.1472	25.1051757550813	11	2	2	3	1	2	3	20.4613395515231	18.9894828796387	17.6214218139648	18.5226345062256	15.7905015945435	17.390287399292	16.8302173614502	0.0233250796535537	-0.015867869059246	-0.0697923132587156	Q02883	Q02883	N-acyl-phosphatidylethanolamine-hydrolyzing phospholipase D, mitochondrial	FMP30	sp|Q02883|FMP30_YEAST N-acyl-phosphatidylethanolamine-hydrolyzing phospholipase D, mitochondrial OS=Saccharomyces cerevisiae (strain ATCC 204508 / S288c) OX=559292 GN=FMP30 PE=1 SV=1
27.8854732513428	28.1065444946289	28.9722137451172	29.0007762908936	28.9741039276123	28.6301345825195	-0.221071	0.857928	-0.0285625	0.980397	0.343969	1.26924			11	11	11	35.1	35.1	35.1	26.066	0	163.51	31.7041305825811	92	9	11	10	9	10	9	28.0037279766802	26.4933834075928	24.8126449584961	25.9687099456787	24.1538314819336	25.4666576385498	23.787956237793	0.0235800836678387	0.0314451853434221	0.0705363327900355	P38523	P38523	GrpE protein homolog, mitochondrial	MGE1	sp|P38523|GRPE_YEAST GrpE protein homolog, mitochondrial OS=Saccharomyces cerevisiae (strain ATCC 204508 / S288c) OX=559292 GN=MGE1 PE=1 SV=1
29.1181526184082	28.704906463623	26.6812362670898	25.3742790222168	25.5510406494141	26.9630069732666	0.413246	1.33168	1.30696	2.47419	-1.41197	0.375799			18	18	18	65.3	65.3	65.3	39.301	0	153.44	31.3198011662197	49	16	17	7	3	4	6	26.9978730713324	26.5472202301025	24.7528190612793	21.9924468994141	18.9711570739746	20.2624702453613	20.7319812774658	0.024103587603937	0.102745691935223	0.0720625333481429	P25379	P25379	Catabolic L-serine/threonine dehydratase;L-serine dehydratase;L-threonine dehydratase	CHA1	sp|P25379|STDH_YEAST Catabolic L-serine/threonine dehydratase OS=Saccharomyces cerevisiae (strain ATCC 204508 / S288c) OX=559292 GN=CHA1 PE=1 SV=2
29.6275100708008	29.8304882049561	28.1466655731201	27.7766189575195	27.8913974761963	28.2374935150146	-0.202978	0.868755	0.370047	1.29239	-0.346096	0.78671			34	34	34	66.4	66.4	66.4	75.15	0	323.31	32.206383483775	150	26	29	21	20	20	19	27.1620213883684	26.4702777862549	24.7473487854004	23.5083332061768	21.9112644195557	23.0134696960449	22.1606330871582	0.0242077225083332	-0.0596758524576835	-0.0723659292248506	P49367	P49367	Homoaconitase, mitochondrial	LYS4	sp|P49367|LYS4_YEAST Homoaconitase, mitochondrial OS=Saccharomyces cerevisiae (strain ATCC 204508 / S288c) OX=559292 GN=LYS4 PE=1 SV=1
24.7366027832031	23.8089199066162	23.721715927124	24.3883094787598	24.2697086334229	24.4531211853027	0.927683	1.90222	-0.666594	0.629992	-0.183413	0.880618			11	11	11	22.1	22.1	22.1	87.325	0	17.63	27.5080151240074	19	2	8	6	2	3	5	22.1505046906599	21.1525802612305	19.5089702606201	18.9998683929443	16.5216770172119	18.7681713104248	18.9700050354004	0.0242139619338374	0.0258922576904297	0.0723841056748912	Q08817	Q08817	Leucine-rich repeat-containing protein SOG2	SOG2	sp|Q08817|SOG2_YEAST Leucine-rich repeat-containing protein SOG2 OS=Saccharomyces cerevisiae (strain ATCC 204508 / S288c) OX=559292 GN=SOG2 PE=1 SV=1
23.2947387695313	22.5124378204346	23.1897106170654	22.9309921264648	23.3273162841797	24.5007553100586	0.782301	1.71987	0.258718	1.19642	-1.17344	0.443363			7	7	7	19.4	19.4	19.4	69.323	0	13.336	26.3220642987172	15	2	4	5	3	4	1	21.1521461759151	19.4322891235352	16.6508827209473	19.0456695556641	17.4946689605713	18.6528453826904	18.5434017181396	0.0243442580842107	-0.0441398620605469	-0.0727636264883932	P35056	P35056	Peroxisomal targeting signal receptor	PEX5	sp|P35056|PEX5_YEAST Peroxisomal targeting signal receptor OS=Saccharomyces cerevisiae (strain ATCC 204508 / S288c) OX=559292 GN=PEX5 PE=1 SV=1
22.7045097351074	23.8373050689697	22.394458770752	NaN	22.3017883300781	21.2426071166992	-1.1328	0.456031	#VALUE!	#VALUE!	1.05918	2.08375			4	4	4	5	5	5	101.33	0	5.8544	25.5187235020138	8	3	2	2	0	2	2	20.3488405146677	18.360631942749	18.1167507171631	18.4518947601318	NaN	18.2118129730225	15.6760396957397	0.0244468389470158	-0.0730371475219727	-0.0745518911975571	P38781;P38780	P38781;P38780	Chromatin structure-remodeling complex protein RSC30;Uncharacterized protein YHR054C	RSC30;YHR054C	sp|P38781|RSC30_YEAST Chromatin structure-remodeling complex protein RSC30 OS=Saccharomyces cerevisiae (strain ATCC 204508 / S288c) OX=559292 GN=RSC30 PE=1 SV=2;sp|P38780|YHL4_YEAST Uncharacterized protein YHR054C OS=Saccharomyces cerevisiae (strain ATCC 2
24.5698738098145	24.6921615600586	26.1125717163086	26.4526672363281	26.9119358062744	26.255334854126	-0.122288	0.91873	-0.340096	0.789989	0.656601	1.57636			3	3	3	62.1	62.1	62.1	14.128	0	62.743	28.8361730874954	21	2	2	2	2	2	2	25.8361730874953	23.2497844696045	21.7552356719971	23.7393360137939	22.6137142181396	24.2477874755859	22.5280265808105	0.0244882732109093	0.0647392272949219	0.0731829900862925	Q12349	Q12349	ATP synthase subunit H, mitochondrial	ATP14	sp|Q12349|ATP14_YEAST ATP synthase subunit H, mitochondrial OS=Saccharomyces cerevisiae (strain ATCC 204508 / S288c) OX=559292 GN=ATP14 PE=1 SV=1
23.8301639556885	24.2044124603271	24.100772857666	24.3525905609131	24.3877830505371	23.8130378723145	-0.374249	0.771507	-0.251818	0.839838	0.574745	1.48941			9	9	9	36.1	36.1	36.1	43.015	0	22.845	26.9246767908796	20	3	4	6	6	5	5	22.6767198320683	20.330904006958	18.8034439086914	20.8023090362549	19.7707710266113	20.7112903594971	18.8973789215088	0.0251636919968705	-0.0171070098876953	-0.075148131075556	P04803	P04803	Tryptophan--tRNA ligase, mitochondrial	MSW1	sp|P04803|SYWM_YEAST Tryptophan--tRNA ligase, mitochondrial OS=Saccharomyces cerevisiae (strain ATCC 204508 / S288c) OX=559292 GN=MSW1 PE=1 SV=2
23.482837677002	23.1077156066895	NaN	21.7880363464355	21.4865016937256	22.7680587768555	0.375122	1.29695	#VALUE!	#VALUE!	-1.28156	0.411351			8	8	8	17	17	17	76.67	0	5.3554	25.8640550008154	11	5	5	0	1	2	4	21.1636152826743	20.6313858032227	18.6883525848389	NaN	14.8509197235107	16.9609298706055	17.1472835540771	0.0254380364398295	-0.0699338912963867	-0.0774946589813149	Q12753	Q12753	Transcriptional activator HAA1	HAA1	sp|Q12753|HAA1_YEAST Transcriptional activator HAA1 OS=Saccharomyces cerevisiae (strain ATCC 204508 / S288c) OX=559292 GN=HAA1 PE=1 SV=1
24.2322044372559	24.0598621368408	23.612455368042	23.655891418457	23.1438884735107	23.3601131439209	0.172342	1.12689	-0.0434361	0.970341	-0.216225	0.860815			5	5	5	32.7	32.7	32.7	24.058	0	16.693	26.6044181709784	13	3	4	1	2	2	2	22.9040406671009	21.260347366333	20.8038845062256	20.2109813690186	19.4262599945068	19.8881015777588	19.236686706543	0.0260284009427934	-0.0291061401367188	-0.0776600863858596	P40099	P40099	5-formyltetrahydrofolate cyclo-ligase	FAU1	sp|P40099|FTHC_YEAST 5-formyltetrahydrofolate cyclo-ligase OS=Saccharomyces cerevisiae (strain ATCC 204508 / S288c) OX=559292 GN=FAU1 PE=1 SV=1
23.1166896820068	NaN	25.1419582366943	24.7326755523682	25.7507266998291	24.770923614502	#VALUE!	#VALUE!	0.409283	1.32803	0.979803	1.9722			8	8	8	43.5	43.5	43.5	34.888	0	21.382	27.3282589678492	22	0	3	7	6	7	6	23.2408029757668	18.8260955810547	NaN	21.8343753814697	19.2105522155762	21.5616016387939	20.9361782073975	0.0262079684374705	-0.0820080439249686	-0.0797764939126059	P38072	P38072	Protein SCO2, mitochondrial	SCO2	sp|P38072|SCO2_YEAST Protein SCO2, mitochondrial OS=Saccharomyces cerevisiae (strain ATCC 204508 / S288c) OX=559292 GN=SCO2 PE=1 SV=1
32.2624855041504	32.2199745178223	32.8745956420898	32.8662910461426	32.9220809936523	32.8998947143555	0.042511	1.0299	0.0083046	1.00577	0.0221863	1.0155			45	45	45	71.9	71.9	71.9	60.751	0	323.31	35.5620916703665	405	39	38	41	43	41	39	30.5621087338195	28.6134395599365	27.2509689331055	28.4943447113037	27.0867919921875	28.2840538024902	27.3184661865234	0.0266081386347771	0.0243339538574219	0.079341750221039	P19882	P19882	Heat shock protein 60, mitochondrial	HSP60	sp|P19882|HSP60_YEAST Heat shock protein 60, mitochondrial OS=Saccharomyces cerevisiae (strain ATCC 204508 / S288c) OX=559292 GN=HSP60 PE=1 SV=1
21.3731575012207	20.5922241210938	NaN	21.6779670715332	21.5511684417725	21.9825916290283	0.780933	1.71824	#VALUE!	#VALUE!	-0.431423	0.74153			2	2	2	14.6	14.6	14.6	18.912	0	9.4667	24.4020403587479	6	2	2	1	1	1	1	21.0801122638605	20.3139591217041	18.2627925872803	NaN	17.1154289245605	18.0087013244629	17.5592880249023	0.0266946548902545	0.0445686976114921	0.0812170768510398	P36116	P36116	Vacuolar protein sorting-associated protein 51	VPS51	sp|P36116|VPS51_YEAST Vacuolar protein sorting-associated protein 51 OS=Saccharomyces cerevisiae (strain ATCC 204508 / S288c) OX=559292 GN=VPS51 PE=1 SV=1
27.826265335083	28.0790786743164	27.7637615203857	27.7622413635254	28.0211505889893	27.7376346588135	-0.252813	0.839258	0.00152016	1.00105	0.283516	1.21716			82	82	82	50.7	50.7	50.7	218.45	0	323.31	30.9402772991601	274	56	61	44	44	50	44	24.2820658164083	23.0377159118652	21.5321712493896	21.509105682373	20.2108612060547	21.6351566314697	20.3118553161621	0.0267826043910588	0.010740915934246	0.0798474438889061	Q02455	Q02455	Protein MLP1	MLP1	sp|Q02455|MLP1_YEAST Protein MLP1 OS=Saccharomyces cerevisiae (strain ATCC 204508 / S288c) OX=559292 GN=MLP1 PE=1 SV=2
22.8997325897217	22.5739231109619	23.5594081878662	23.9775352478027	24.1600017547607	24.2198524475098	0.325809	1.25337	-0.418127	0.748396	-0.0598507	0.959363			10	10	10	11.3	11.3	11.3	128.13	0	23.157	26.5951978281389	18	3	5	6	3	6	1	20.7877973675432	18.5098209381104	16.7197360992432	18.7695922851563	17.1406097412109	19.3085479736328	16.4318408966064	0.0270551897611111	-0.0507227579752616	-0.0806371843785157	Q03660	Q03660	Trafficking protein particle complex II-specific subunit 130	TRS130	sp|Q03660|TR130_YEAST Trafficking protein particle complex II-specific subunit 130 OS=Saccharomyces cerevisiae (strain ATCC 204508 / S288c) OX=559292 GN=TRS130 PE=1 SV=1
22.5016670227051	NaN	24.1772155761719	23.1621551513672	24.0626640319824	23.8743648529053	#VALUE!	#VALUE!	1.01506	2.02099	0.188299	1.13942			3	3	3	16.7	16.7	16.7	42.852	0	15.419	26.2864085748489	8	0	1	2	1	3	1	21.8941175922472	18.0082092285156	NaN	20.8019924163818	18.2102909088135	20.371244430542	17.1553115844727	0.0274325062744158	0.0622555414835624	0.0833984547340081	Q06648	Q06648	GTPase-interacting component 2	GIC2	sp|Q06648|GIC2_YEAST GTPase-interacting component 2 OS=Saccharomyces cerevisiae (strain ATCC 204508 / S288c) OX=559292 GN=GIC2 PE=1 SV=1
28.1130199432373	28.2006015777588	28.9022216796875	28.904691696167	29.2012805938721	29.0088386535645	-0.0875816	0.941099	-0.00247002	0.998289	0.192442	1.1427			10	10	10	71.1	71.1	71.1	15.386	0	146.27	31.5716327053657	54	8	8	10	10	9	10	28.7642687427043	26.5583724975586	25.1266403198242	26.8149452209473	25.2758293151855	26.5860614776611	25.863748550415	0.0278114793492584	0.0341300964355469	0.0828260598618113	P32445	P32445	Single-stranded DNA-binding protein RIM1, mitochondrial	RIM1	sp|P32445|RIM1_YEAST Single-stranded DNA-binding protein RIM1, mitochondrial OS=Saccharomyces cerevisiae (strain ATCC 204508 / S288c) OX=559292 GN=RIM1 PE=1 SV=1
21.2334480285645	20.9998950958252	22.1238899230957	21.749641418457	22.0431346893311	22.5190773010254	0.233553	1.17573	0.374249	1.29616	-0.475943	0.718997			2	2	2	22.9	22.9	22.9	15.02	0	7.3279	24.6520659398065	7	1	1	2	1	2	1	22.0671034390854	19.6794967651367	17.0174827575684	20.4744701385498	18.8010139465332	19.8097057342529	19.1679573059082	0.0282505094439903	0.0439529418945313	0.0840951920355131	P28778	P28778	37S ribosomal protein MRP17, mitochondrial	MRP17	sp|P28778|RT06_YEAST 37S ribosomal protein MRP17, mitochondrial OS=Saccharomyces cerevisiae (strain ATCC 204508 / S288c) OX=559292 GN=MRP17 PE=1 SV=1
22.5928840637207	23.5292186737061	23.2485256195068	NaN	23.889575958252	22.8644981384277	-0.936335	0.522559	#VALUE!	#VALUE!	1.02508	2.03507			2	2	2	27.7	27.7	27.7	14.995	0	20.765	25.9636694124912	5	1	1	2	0	2	2	23.378751003243	19.769495010376	19.0839729309082	22.1218681335449	NaN	21.9662075042725	19.6023540496826	0.0283768555873945	0.0468034744262695	0.086185689784171	P53157	P53157	Mitochondrial pyruvate carrier 1	MPC1	sp|P53157|MPC1_YEAST Mitochondrial pyruvate carrier 1 OS=Saccharomyces cerevisiae (strain ATCC 204508 / S288c) OX=559292 GN=MPC1 PE=1 SV=1
28.1087894439697	28.3638591766357	26.4913959503174	26.5867767333984	26.6130180358887	26.4665336608887	-0.25507	0.837947	-0.0953808	0.936025	0.146484	1.10687			27	27	27	48.4	48.4	48.4	62.773	0	145.59	30.6861220756438	105	22	24	9	11	11	11	25.6861087142016	24.9625225067139	23.6475715637207	21.4090385437012	20.290189743042	21.4121437072754	20.303295135498	0.0284062715008666	-0.0679887135823556	-0.084545195512816	P40215;Q07500	P40215	External NADH-ubiquinone oxidoreductase 1, mitochondrial	NDE1	sp|P40215|NDH1_YEAST External NADH-ubiquinone oxidoreductase 1, mitochondrial OS=Saccharomyces cerevisiae (strain ATCC 204508 / S288c) OX=559292 GN=NDE1 PE=1 SV=1
25.259973526001	25.1115570068359	23.4194412231445	23.3289604187012	23.7190017700195	NaN	0.148417	1.10835	0.0904808	1.06472	#VALUE!	#VALUE!			7	7	7	20.2	20.2	20.2	54.381	0	21.029	27.6822420625303	19	5	6	3	1	3	0	24.3603139676429	23.8111763000488	21.9362144470215	20.2654495239258	18.2100048065186	20.2431888580322	NaN	0.0290597450246537	-0.0874532063802071	-0.0881980085369778	P54785	P54785	Transcriptional activator/repressor MOT3	MOT3	sp|P54785|MOT3_YEAST Transcriptional activator/repressor MOT3 OS=Saccharomyces cerevisiae (strain ATCC 204508 / S288c) OX=559292 GN=MOT3 PE=1 SV=1
24.53249168396	23.9795436859131	22.3566246032715	23.0320415496826	22.7224235534668	22.387113571167	0.552948	1.46708	-0.675417	0.626151	0.33531	1.26165			6	6	6	11.6	11.6	11.6	73.86	0	11.948	26.7023976153567	16	5	5	2	2	1	2	21.7023553379595	20.9522666931152	19.4384136199951	17.7816791534424	17.3941440582275	17.554723739624	16.3386669158936	0.0292268006964348	0.0709470113118513	0.0869134326955982	P03874	P03874	Cytochrome B pre-mRNA-processing protein 2	CBP2	sp|P03874|CBP2_YEAST Cytochrome B pre-mRNA-processing protein 2 OS=Saccharomyces cerevisiae (strain ATCC 204508 / S288c) OX=559292 GN=CBP2 PE=1 SV=2
22.7783832550049	22.8864345550537	23.1555938720703	22.8143672943115	23.5276679992676	23.6677398681641	-0.108051	0.92784	0.341227	1.26683	-0.140072	0.907474			7	7	7	16.3	16.3	16.3	69.064	0	13.964	26.5857749472685	15	4	3	4	2	5	3	21.4983350239464	20.4438457489014	18.5883483886719	18.5771045684814	16.1763095855713	18.8981761932373	17.5221366882324	0.0299695308087609	0.0310344696044922	0.0890537916708792	P33203	P33203	Pre-mRNA-processing protein PRP40	PRP40	sp|P33203|PRP40_YEAST Pre-mRNA-processing protein PRP40 OS=Saccharomyces cerevisiae (strain ATCC 204508 / S288c) OX=559292 GN=PRP40 PE=1 SV=1
24.2133407592773	24.0095806121826	23.7206726074219	24.2125244140625	24.126916885376	23.8866958618164	0.20376	1.1517	-0.491852	0.711112	0.240221	1.18117			6	6	6	24.2	24.2	24.2	34.47	0	10.301	27.0116932238183	24	5	4	5	4	4	4	23.3111895313799	21.899585723877	20.4662284851074	20.7372741699219	19.665548324585	20.6154899597168	19.7164573669434	0.0299758996273741	-0.0159568786621094	-0.089072131341453	P25368	P25368	Ribosomal RNA-processing protein 7	RRP7	sp|P25368|RRP7_YEAST Ribosomal RNA-processing protein 7 OS=Saccharomyces cerevisiae (strain ATCC 204508 / S288c) OX=559292 GN=RRP7 PE=1 SV=1
23.2948799133301	23.583366394043	22.8353595733643	22.9471015930176	22.9190349578857	22.4185657501221	-0.288486	0.818761	-0.111742	0.92547	0.500469	1.41467			8	8	7	13.3	13.3	11.7	85.299	0	13.23	26.0762472034613	19	5	5	5	4	5	5	20.9469947729338	19.5917491912842	18.4312686920166	18.2495670318604	16.9050102233887	18.2765789031982	16.9422626495361	0.0308197002313905	0.0334135691324882	0.0914998984174486	P40328	P40328	Probable 26S protease subunit YTA6	YTA6	sp|P40328|TBP6_YEAST Probable 26S proteasome subunit YTA6 OS=Saccharomyces cerevisiae (strain ATCC 204508 / S288c) OX=559292 GN=YTA6 PE=1 SV=2
31.4709205627441	31.5289688110352	29.1095104217529	28.9422931671143	29.2416820526123	29.0366134643555	-0.0580482	0.960563	0.167217	1.12289	0.205069	1.15274			25	25	25	59.6	59.6	59.6	40.068	0	323.31	33.7274053102578	182	24	25	18	19	19	19	29.2679412301097	28.5461673736572	27.1283912658691	25.2874660491943	23.7388210296631	25.0901470184326	24.0263957977295	0.0308968305850664	0.104745864868164	0.0917216144591405	P40495	P40495	Homoisocitrate dehydrogenase, mitochondrial	LYS12	sp|P40495|LYS12_YEAST Homoisocitrate dehydrogenase, mitochondrial OS=Saccharomyces cerevisiae (strain ATCC 204508 / S288c) OX=559292 GN=LYS12 PE=1 SV=1
23.3154792785645	22.8613967895508	24.2160091400146	24.7467346191406	24.2490177154541	24.3623886108398	0.454082	1.36991	-0.530725	0.692207	-0.113371	0.924426			5	5	5	11	11	11	70.191	0	12.494	27.0945640417419	19	1	3	4	4	3	3	22.5096377815965	18.5808620452881	14.857349395752	21.8221321105957	17.2379016876221	20.5673694610596	17.0249671936035	0.0328160167704626	-0.0633379618326835	-0.0972276132319345	Q02100	Q02100	CRE-binding bZIP protein SKO1	SKO1	sp|Q02100|SKO1_YEAST CRE-binding bZIP protein SKO1 OS=Saccharomyces cerevisiae (strain ATCC 204508 / S288c) OX=559292 GN=SKO1 PE=1 SV=1
23.8744583129883	23.8388442993164	24.9950275421143	25.225564956665	25.1802940368652	25.1632690429688	0.035614	1.02499	-0.230537	0.852317	0.017025	1.01187			6	6	6	36	36	36	18.751	0	25.358	27.5679031717664	32	3	3	6	5	6	6	24.3979346625799	21.7753105163574	20.1831359863281	22.5462779998779	21.3898448944092	22.5253524780273	21.2046070098877	0.0328655717555181	-0.0592994689941406	-0.0973695084023676	P06704	P06704	Cell division control protein 31	CDC31	sp|P06704|CDC31_YEAST Cell division control protein 31 OS=Saccharomyces cerevisiae (strain ATCC 204508 / S288c) OX=559292 GN=CDC31 PE=1 SV=2
27.7805042266846	28.139949798584	28.7859077453613	28.4519519805908	28.8843975067139	28.738956451416	-0.359446	0.779464	0.333956	1.26046	0.145441	1.10607			14	14	14	48.6	48.6	48.6	42.038	0	185.47	31.4080616466658	62	10	10	10	7	9	7	27.5011963657157	25.6374626159668	24.3851528167725	25.489896774292	23.6626434326172	25.0821685791016	24.2490177154541	0.0344098400693608	0.0399837493896484	0.101784483273036	P23644	P23644	Mitochondrial import receptor subunit TOM40	TOM40	sp|P23644|TOM40_YEAST Mitochondrial import receptor subunit TOM40 OS=Saccharomyces cerevisiae (strain ATCC 204508 / S288c) OX=559292 GN=TOM40 PE=1 SV=1
28.633602142334	27.8896579742432	27.5596122741699	28.0375823974609	27.6551952362061	28.0275993347168	0.743944	1.67475	-0.47797	0.717987	-0.372404	0.772494			70	70	70	52	52	52	163.14	0	323.31	31.3472047191772	238	49	60	31	33	36	41	24.9549126455285	24.2781715393066	21.6610565185547	21.5462779998779	20.5631847381592	21.2782707214355	20.7014255523682	0.0346225331896573	-0.0354766845703125	-0.102391522686753	P23201	P23201	Protein SPA2	SPA2	sp|P23201|SPA2_YEAST Protein SPA2 OS=Saccharomyces cerevisiae (strain ATCC 204508 / S288c) OX=559292 GN=SPA2 PE=1 SV=1
24.8347034454346	25.1727981567383	24.6514644622803	24.5346908569336	25.3928031921387	25.2796230316162	-0.338095	0.791085	0.116774	1.08431	0.11318	1.08161			5	5	5	24.5	24.5	24.5	24.656	0	25.456	27.914733204435	18	4	2	3	3	4	5	24.4553186907238	22.7306976318359	21.5569801330566	21.8639698028564	20.1387119293213	22.2996940612793	21.4287967681885	0.0379627156290702	-0.0360469818115234	-0.11189202310209	Q05942	Q05942	Ribosome assembly protein 3	RSA3	sp|Q05942|RSA3_YEAST Ribosome assembly protein 3 OS=Saccharomyces cerevisiae (strain ATCC 204508 / S288c) OX=559292 GN=RSA3 PE=1 SV=1
30.5316677093506	30.508903503418	30.8918609619141	30.9894256591797	31.0021591186523	30.8586807250977	0.0227642	1.0159	-0.0975647	0.934609	0.143478	1.10457			25	25	25	67.5	67.5	67.5	44.67	0	323.31	33.7334789722212	311	22	22	24	24	24	25	29.7334708910052	28.1173858642578	26.6704711914063	27.3961544036865	26.2347106933594	27.2160453796387	26.3088130950928	0.0384936860531634	0.0228926340738909	0.113396672582958	P25491	P25491	Mitochondrial protein import protein MAS5	YDJ1	sp|P25491|MAS5_YEAST Mitochondrial protein import protein MAS5 OS=Saccharomyces cerevisiae (strain ATCC 204508 / S288c) OX=559292 GN=YDJ1 PE=1 SV=1
21.7441082000732	21.3925724029541	21.7730579376221	21.443998336792	20.7009162902832	21.259428024292	0.351536	1.27592	0.32906	1.25619	-0.558512	0.679002			1	1	1	3.6	3.6	3.6	41.289	0.0018111	2.1141	24.5255198532726	4	1	1	1	1	1	1	20.066052390835	18.8644161224365	16.9644317626953	18.0027275085449	16.1993274688721	16.3191432952881	16.1540660858154	0.0387127146236952	0.0406945546468123	0.114016906885581	P07266	P07266	Mitochondrial RNA-splicing protein MRS1	MRS1	sp|P07266|MRS1_YEAST Mitochondrial RNA-splicing protein MRS1 OS=Saccharomyces cerevisiae (strain ATCC 204508 / S288c) OX=559292 GN=MRS1 PE=1 SV=2
28.1251926422119	28.3809642791748	28.0225276947021	28.1030464172363	28.3999080657959	28.0093460083008	-0.255772	0.837539	-0.0805187	0.945718	0.390562	1.3109			15	15	15	62.9	62.9	62.9	35.032	0	215.21	31.1785466289389	116	10	11	12	12	13	11	27.3711917068813	25.8165321350098	24.2875003814697	25.1321830749512	23.4267520904541	24.9732055664063	23.6363296508789	0.0387395511828743	0.0180905659993478	0.114092883572397	P53598	P53598	Succinyl-CoA ligase [ADP-forming] subunit alpha, mitochondrial	LSC1	sp|P53598|SUCA_YEAST Succinate--CoA ligase [ADP-forming] subunit alpha, mitochondrial OS=Saccharomyces cerevisiae (strain ATCC 204508 / S288c) OX=559292 GN=LSC1 PE=1 SV=1
21.6407260894775	23.3528594970703	25.6475982666016	24.7946643829346	26.1514930725098	24.7746486663818	-1.71213	0.305208	0.852934	1.80617	1.37684	2.597			8	8	8	36.2	36.2	36.2	21.229	0	45.707	27.6941831480787	27	3	2	6	6	6	6	24.524264790087	20.0236415863037	20.2974853515625	22.891227722168	21.1649036407471	23.1694221496582	21.0757446289063	0.0389432518268728	0.172548294067383	0.114669451961225	Q12032	Q12032	Altered inheritance of mitochondria protein 41, mitochondrial	AIM41	sp|Q12032|AIM41_YEAST Altered inheritance of mitochondria protein 41, mitochondrial OS=Saccharomyces cerevisiae (strain ATCC 204508 / S288c) OX=559292 GN=AIM41 PE=1 SV=1
27.2916698455811	27.5219306945801	27.5979709625244	27.6118927001953	27.9074745178223	27.7281913757324	-0.230261	0.852481	-0.0139217	0.990397	0.179283	1.13232			31	31	31	34.8	34.8	34.8	128.53	0	107.71	30.5479336185885	121	22	21	23	19	22	19	24.570684941808	22.8846664428711	21.53297996521	22.349515914917	20.4311466217041	22.0695304870605	21.5070266723633	0.0391875340554207	-0.0216331481933594	-0.115360591359975	P47035	P47035	Nucleolar protein NET1	NET1	sp|P47035|NET1_YEAST Nucleolar protein NET1 OS=Saccharomyces cerevisiae (strain ATCC 204508 / S288c) OX=559292 GN=NET1 PE=1 SV=1
22.8797950744629	23.6047859191895	23.5965061187744	23.2707061767578	23.7611141204834	23.2596874237061	-0.724991	0.605001	0.3258	1.25336	0.501427	1.41561			7	7	7	39.7	39.7	39.7	26.959	0	11.97	26.2657077481624	13	4	4	2	3	3	4	22.5652555127815	20.5685768127441	19.7761154174805	20.3390846252441	18.7567195892334	20.2767372131348	19.4448375701904	0.0394826555698327	0.0340785980224609	0.116195141787149	P50945	P50945	MICOS complex subunit MIC27	MIC27	sp|P50945|MIC27_YEAST MICOS complex subunit MIC27 OS=Saccharomyces cerevisiae (strain ATCC 204508 / S288c) OX=559292 GN=MIC27 PE=1 SV=1
23.9933452606201	24.7884540557861	23.8066596984863	23.3330631256104	23.8835296630859	23.3928356170654	-0.795109	0.5763	0.473597	1.38857	0.490694	1.40512			6	6	6	29.1	29.1	29.1	26.406	0	7.5891	26.9904261905509	10	4	3	4	2	3	3	23.2899648312808	21.654821395874	21.2549953460693	20.7920150756836	17.6628913879395	20.9196166992188	18.7642879486084	0.0400653696281037	0.0563939412434884	0.117841583954647	P38771	P38771	Ribosome-recycling factor, mitochondrial	RRF1	sp|P38771|RRF1_YEAST Ribosome-recycling factor, mitochondrial OS=Saccharomyces cerevisiae (strain ATCC 204508 / S288c) OX=559292 GN=RRF1 PE=1 SV=1
22.80544090271	22.7588176727295	23.6159381866455	24.0899047851563	24.0554008483887	23.8215293884277	0.0466232	1.03284	-0.473967	0.719982	0.233871	1.17599			5	5	5	17.2	17.2	17.2	39.445	0	7.6484	26.3327552925324	9	2	3	3	3	4	3	22.0108271976451	19.6401538848877	17.8864936828613	19.5328464508057	19.1358337402344	20.323335647583	18.9878749847412	0.0400862249847803	-0.0644906361897775	-0.117900476578808	Q02950	Q02950	37S ribosomal protein MRP51, mitochondrial	MRP51	sp|Q02950|RT51_YEAST 37S ribosomal protein MRP51, mitochondrial OS=Saccharomyces cerevisiae (strain ATCC 204508 / S288c) OX=559292 GN=MRP51 PE=1 SV=1
30.6884574890137	30.7331161499023	28.2494792938232	27.9653224945068	28.2081108093262	28.0095062255859	-0.0446587	0.969519	0.284157	1.2177	0.198605	1.14759			35	35	35	49.9	49.9	49.9	86.582	0	323.31	32.9539884016687	201	31	35	21	21	23	21	27.9095925483632	27.2744426727295	25.7111434936523	23.7735424041748	22.1957454681396	23.3887691497803	22.1743850708008	0.0404169670037257	0.146034240722656	0.118834136251025	P39533	P39533	Homocitrate dehydratase, mitochondrial	ACO2	sp|P39533|ACON2_YEAST Homocitrate dehydratase, mitochondrial OS=Saccharomyces cerevisiae (strain ATCC 204508 / S288c) OX=559292 GN=ACO2 PE=1 SV=1
21.4187984466553	NaN	22.261754989624	22.025297164917	22.5115203857422	21.9990692138672	#VALUE!	#VALUE!	0.236458	1.1781	0.512451	1.42647			3	3	3	8.3	8.3	8.3	53.719	0	5.632	24.7717800019816	8	0	1	3	1	1	1	20.248177753652	18.4387588500977	NaN	18.5095119476318	16.680305480957	18.1865978240967	16.7933502197266	0.0404731035785037	0.0518414179484061	0.121443064538257	Q12049	Q12049	Protein THP3	THP3	sp|Q12049|THP3_YEAST Protein THP3 OS=Saccharomyces cerevisiae (strain ATCC 204508 / S288c) OX=559292 GN=THP3 PE=1 SV=1
28.6684436798096	29.1700687408447	28.4635353088379	28.2364902496338	28.4954128265381	28.3311672210693	-0.501625	0.706311	0.227045	1.17044	0.164246	1.12058			18	18	18	76.8	76.8	76.8	32.812	0	132.71	31.7509892792558	82	12	12	15	16	13	13	27.7509812955307	26.7400817871094	25.3458728790283	24.6136360168457	23.357027053833	24.3910007476807	23.6021823883057	0.0412591203059162	-0.0367781321207659	-0.121208847209033	P23641	P23641	Mitochondrial phosphate carrier protein;Mitochondrial phosphate carrier protein, N-terminally processed	MIR1	sp|P23641|MPCP_YEAST Mitochondrial phosphate carrier protein OS=Saccharomyces cerevisiae (strain ATCC 204508 / S288c) OX=559292 GN=MIR1 PE=1 SV=1
26.31369972229	25.3307399749756	23.3357906341553	23.9798927307129	23.9825057983398	23.9508247375488	0.98296	1.97652	-0.644102	0.639891	0.0316811	1.0222			9	9	9	24.3	24.3	24.3	60.798	0	25.413	28.0689183886819	21	6	8	3	4	2	3	23.1620482879386	22.1477432250977	21.9267997741699	17.7703018188477	16.9298362731934	18.1863079071045	16.6896152496338	0.0415385201341171	0.123512903849285	0.121995871418562	P36119	P36119	Uncharacterized protein YKR023W	YKR023W	sp|P36119|RQT4_YEAST RQC trigger complex subunit RQT4 OS=Saccharomyces cerevisiae (strain ATCC 204508 / S288c) OX=559292 GN=RQT4 PE=1 SV=1
23.6673069000244	23.8399963378906	22.946102142334	22.9906635284424	23.5510997772217	23.2084522247314	-0.172689	0.887187	-0.0445614	0.969585	0.342648	1.26808			3	3	3	23	23	23	18.387	0	12.301	26.5247878657755	11	2	3	3	2	3	2	23.2028597708882	22.0542736053467	20.4292068481445	20.2141857147217	18.734167098999	20.6242637634277	19.2402324676514	0.0420154899364851	0.0417989095052071	0.12333846644649	P40858	P40858	54S ribosomal protein L49, mitochondrial	MRPL49	sp|P40858|RN49_YEAST 54S ribosomal protein L49, mitochondrial OS=Saccharomyces cerevisiae (strain ATCC 204508 / S288c) OX=559292 GN=MRPL49 PE=1 SV=2
23.0789737701416	22.6515617370605	26.7289714813232	26.4944362640381	26.1905765533447	26.2173767089844	0.427412	1.34482	0.234535	1.17653	-0.0268002	0.981595			9	9	9	20.5	20.5	20.5	79.715	0	45.664	28.5810762533182	30	1	2	8	8	9	7	23.4517393458191	18.4520969390869	15.8768043518066	22.2725296020508	20.3379955291748	21.6275177001953	20.4405040740967	0.042947474347672	0.211715698242188	0.125958404299008	P11972	P11972	Protein SST2	SST2	sp|P11972|SST2_YEAST Protein SST2 OS=Saccharomyces cerevisiae (strain ATCC 204508 / S288c) OX=559292 GN=SST2 PE=1 SV=2
23.3322429656982	24.099889755249	24.1241569519043	23.7165966033936	24.3598442077637	24.1275463104248	-0.767647	0.587375	0.40756	1.32644	0.232298	1.1747			12	12	12	17.1	17.1	17.1	119.92	0	21.351	26.8979298166178	27	7	5	8	7	9	6	21.283196898427	19.3831729888916	18.9659538269043	18.9549808502197	17.0439891815186	18.9229145050049	17.7199363708496	0.0429839267556585	-0.0425961812337228	-0.126060784589852	P39104	P39104	Phosphatidylinositol 4-kinase PIK1	PIK1	sp|P39104|PIK1_YEAST Phosphatidylinositol 4-kinase PIK1 OS=Saccharomyces cerevisiae (strain ATCC 204508 / S288c) OX=559292 GN=PIK1 PE=1 SV=1
NaN	NaN	22.6537933349609	22.750337600708	23.040828704834	22.8887767791748	#VALUE!	#VALUE!	-0.0965443	0.935271	0.152052	1.11115			4	4	4	17.2	17.2	17.2	56.741	0	11.304	25.0835491204831	12	1	1	2	1	3	3	20.1294339606779	16.5036869049072	16.1277732849121	18.0889225006104	15.5158843994141	18.7213726043701	17.776741027832	0.0433775831284815	0.0277538299560547	0.135038832949411	P27697	P27697	Atypical kinase COQ8, mitochondrial	COQ8	sp|P27697|COQ8_YEAST Atypical kinase COQ8, mitochondrial OS=Saccharomyces cerevisiae (strain ATCC 204508 / S288c) OX=559292 GN=COQ8 PE=1 SV=1
NaN	NaN	23.5321960449219	22.8031158447266	22.1819534301758	22.7235488891602	#VALUE!	#VALUE!	0.72908	1.65758	-0.541595	0.687011			3	3	3	11	11	11	56.472	0	18.017	25.6125117343682	7	1	1	1	1	1	2	20.9121057617692	19.0079364776611	17.6566200256348	19.3627738952637	17.3595600128174	17.7584438323975	17.4193019866943	0.0445750135423284	0.0937423706054688	0.13861217562645	P53923	P53923	Cytoplasmic tRNA 2-thiolation protein 2	NCS2	sp|P53923|CTU2_YEAST Cytoplasmic tRNA 2-thiolation protein 2 OS=Saccharomyces cerevisiae (strain ATCC 204508 / S288c) OX=559292 GN=NCS2 PE=1 SV=1
23.9744758605957	23.1133232116699	NaN	22.7813472747803	22.4606399536133	23.5066394805908	0.861153	1.81649	#VALUE!	#VALUE!	-1.046	0.484309			6	6	6	8.4	8.4	8.4	123.91	0.00026178	2.4525	25.7421659088705	6	4	1	0	2	2	2	19.8841705191084	18.4223442077637	16.5149765014648	NaN	12.2086915969849	17.5473613739014	18.3165016174316	0.0448150557054744	0.0837879180908203	0.133905971352405	P38827	P38827	Histone-lysine N-methyltransferase, H3 lysine-4 specific	SET1	sp|P38827|SET1_YEAST Histone-lysine N-methyltransferase, H3 lysine-4 specific OS=Saccharomyces cerevisiae (strain ATCC 204508 / S288c) OX=559292 GN=SET1 PE=1 SV=1
24.1583862304688	24.8550510406494	24.7462730407715	24.0354022979736	25.1125526428223	24.9672355651855	-0.696665	0.616997	0.710871	1.63679	0.145317	1.10597			16	16	16	26.4	26.4	26.4	113.58	0	26.851	27.68458469806	35	10	10	7	4	7	7	22.0407619469632	20.3242149353027	19.4004325866699	19.7900276184082	17.1389122009277	19.7499771118164	18.5243968963623	0.0449265733914293	0.0531743367513045	0.131506895710018	P20676	P20676	Nucleoporin NUP1	NUP1	sp|P20676|NUP1_YEAST Nucleoporin NUP1 OS=Saccharomyces cerevisiae (strain ATCC 204508 / S288c) OX=559292 GN=NUP1 PE=1 SV=1
25.3407897949219	25.0418071746826	24.5218105316162	24.6087951660156	24.4812984466553	24.5667419433594	0.298983	1.23028	-0.0869846	0.941488	-0.0854435	0.942495			5	5	5	27.6	27.6	27.6	22.379	0	12.216	28.0534646574485	20	4	5	4	2	4	4	24.2461200932173	23.355281829834	21.0226249694824	21.2872047424316	19.5281028747559	21.3140144348145	20.0875759124756	0.045261994962059	0.0421848297119141	0.132445253899117	P40018	P40018	Small nuclear ribonucleoprotein-associated protein B	SMB1	sp|P40018|RSMB_YEAST Small nuclear ribonucleoprotein-associated protein B OS=Saccharomyces cerevisiae (strain ATCC 204508 / S288c) OX=559292 GN=SMB1 PE=1 SV=1
23.1057033538818	23.7735424041748	24.8526706695557	24.659107208252	25.1039352416992	24.9159297943115	-0.667839	0.629449	0.193563	1.14358	0.188005	1.13919			9	9	9	28.9	28.9	28.9	36.554	0	12.969	27.3017328498644	21	4	3	9	6	9	6	22.842320415874	19.8472499847412	18.5307331085205	21.1602325439453	19.4504871368408	21.0936489105225	19.7802066802979	0.0454668636944394	-0.0954233805338554	-0.133018099035684	P22135	P22135	Protein ATP12, mitochondrial	ATP12	sp|P22135|ATP12_YEAST Protein ATP12, mitochondrial OS=Saccharomyces cerevisiae (strain ATCC 204508 / S288c) OX=559292 GN=ATP12 PE=1 SV=2
NaN	21.2736682891846	22.2616386413574	23.0087947845459	22.7887935638428	23.6804599761963	#VALUE!	#VALUE!	-0.747156	0.595777	-0.891666	0.538991			8	7	7	8.9	8	8	159.44	0	11.767	24.9825925723486	19	1	0	6	5	4	6	19.0053339723087	NaN	14.5923986434937	17.4202060699463	16.4048252105713	16.6750755310059	17.0398178100586	0.0456939291313575	-0.12909158070882	-0.136416767875138	P47102	P47102	ARF guanine-nucleotide exchange factor 1	GEA1	sp|P47102|GEA1_YEAST ARF guanine-nucleotide exchange factor 1 OS=Saccharomyces cerevisiae (strain ATCC 204508 / S288c) OX=559292 GN=GEA1 PE=1 SV=1
21.579252243042	22.1728591918945	22.4759788513184	22.3695411682129	22.3647422790527	21.9992408752441	-0.593607	0.662684	0.106438	1.07657	0.365501	1.28833			2	2	2	6.9	6.9	6.9	42.484	0	3.3859	25.1109601862548	4	2	2	1	1	1	1	20.9410590722716	18.9734840393066	18.0039901733398	19.0820770263672	17.2062892913818	18.6054859161377	16.9936904907227	0.045955229868559	-0.0405559539794922	-0.13438277741393	Q02890	Q02890	Peptide-N(4)-(N-acetyl-beta-glucosaminyl)asparagine amidase	PNG1	sp|Q02890|PNG1_YEAST Peptide-N(4)-(N-acetyl-beta-glucosaminyl)asparagine amidase OS=Saccharomyces cerevisiae (strain ATCC 204508 / S288c) OX=559292 GN=PNG1 PE=1 SV=1
23.8603172302246	24.3637256622314	24.3542728424072	24.1439037322998	24.6921081542969	24.2977504730225	-0.503408	0.705438	0.210369	1.15698	0.394358	1.31436			9	9	9	35.9	35.9	35.9	32.212	0	19.89	27.3882104679663	25	5	7	7	5	6	3	23.1403043081567	21.611442565918	19.8004608154297	21.0975761413574	19.0299072265625	20.939266204834	18.3686676025391	0.0461800188078666	0.0337727864583321	0.135010510899228	P36528	P36528	54S ribosomal protein L17, mitochondrial	MRPL17	sp|P36528|RM17_YEAST 54S ribosomal protein L17, mitochondrial OS=Saccharomyces cerevisiae (strain ATCC 204508 / S288c) OX=559292 GN=MRPL17 PE=1 SV=2
20.2579917907715	21.1085300445557	21.42746925354	NaN	NaN	20.7588996887207	-0.850538	0.554578	#VALUE!	#VALUE!	#VALUE!	#VALUE!			4	3	3	6.7	5.5	5.5	90.21	0.0018074	2.0835	23.5206129260919	4	2	2	1	0	0	1	18.1630501317914	17.0161762237549	16.3006744384766	15.8216247558594	NaN	NaN	14.4463081359863	0.0480962475040768	-0.0909843444824219	-0.149078614646845	P39956	P39956	DNA damage-responsive transcriptional repressor RPH1	RPH1	sp|P39956|RPH1_YEAST DNA damage-responsive transcriptional repressor RPH1 OS=Saccharomyces cerevisiae (strain ATCC 204508 / S288c) OX=559292 GN=RPH1 PE=1 SV=1
29.0582466125488	28.8203735351563	29.0994892120361	29.4032039642334	29.5528144836426	29.6067314147949	0.237873	1.17925	-0.303715	0.810164	-0.0539169	0.963317			7	7	7	70.8	70.8	70.8	11.372	0	154.43	32.1473442223445	63	6	6	5	6	6	6	29.5623817216233	27.9510478973389	26.3209457397461	26.99733543396	26.2064266204834	27.061882019043	26.5460567474365	0.0481811931603773	-0.0399195353190116	-0.140587525198241	P38910	P38910	10 kDa heat shock protein, mitochondrial	HSP10	sp|P38910|CH10_YEAST 10 kDa heat shock protein, mitochondrial OS=Saccharomyces cerevisiae (strain ATCC 204508 / S288c) OX=559292 GN=HSP10 PE=1 SV=1
21.9436359405518	23.0644912719727	23.1508769989014	22.1201915740967	23.1157855987549	22.8197765350342	-1.12086	0.459821	1.03069	2.04299	0.296009	1.22774			8	8	8	17.5	17.5	17.5	70.861	0	13.801	25.7303967474153	15	5	3	5	2	6	2	20.776195253994	18.4241504669189	18.2303199768066	19.0065116882324	15.7018480300903	18.8527297973633	16.3437747955322	0.0482626173190004	0.0686130523681641	0.140814013642254	Q12374	Q12374	Nuclear control of ATPase protein 2	NCA2	sp|Q12374|NCA2_YEAST Nuclear control of ATPase protein 2 OS=Saccharomyces cerevisiae (strain ATCC 204508 / S288c) OX=559292 GN=NCA2 PE=1 SV=1
22.6765270233154	22.5340728759766	NaN	21.9746685028076	21.9191799163818	22.2319259643555	0.142454	1.10378	#VALUE!	#VALUE!	-0.312746	0.805108			8	8	8	13.6	13.6	13.6	85.136	0	8.4916	25.8027715347638	11	5	5	4	1	2	1	20.6734885178189	19.6078910827637	18.5198745727539	18.6414947509766	13.9692068099976	15.6499300003052	14.3658437728882	0.0487745874621405	0.05096435546875	0.145186760680031	P33311	P33311	ATP-dependent permease MDL2, mitochondrial	MDL2	sp|P33311|MDL2_YEAST ATP-dependent permease MDL2, mitochondrial OS=Saccharomyces cerevisiae (strain ATCC 204508 / S288c) OX=559292 GN=MDL2 PE=1 SV=3
21.8287696838379	22.6898708343506	22.4905948638916	22.2405986785889	22.7658557891846	22.0066566467285	-0.861101	0.550532	0.249996	1.1892	0.759199	1.69255			4	4	4	7.1	7.1	7.1	105.49	0	6.6395	25.1689028331617	11	4	1	2	2	3	2	19.8834845511191	17.4718341827393	17.8163471221924	17.6053791046143	16.5689945220947	17.6681652069092	15.6018867492676	0.0494102133969843	0.0493647257486991	0.14400260027821	P54786	P54786	Protein ZDS2	ZDS2	sp|P54786|ZDS2_YEAST Protein ZDS2 OS=Saccharomyces cerevisiae (strain ATCC 204508 / S288c) OX=559292 GN=ZDS2 PE=1 SV=1
31.6287536621094	31.8028583526611	32.6716651916504	32.6506996154785	32.8657188415527	32.5107650756836	-0.174105	0.886317	0.0209656	1.01464	0.354954	1.27894			50	50	44	68.5	68.5	61.6	70.627	0	323.31	35.2624154391874	542	41	40	46	49	46	45	30.3082366311818	28.2583122253418	26.9219570159912	28.2523231506348	27.0597171783447	28.1267185211182	26.9379787445068	0.0496312850891955	0.0672715504964145	0.14461608651698	P0CS90	P0CS90	Heat shock protein SSC1, mitochondrial	SSC1	sp|P0CS90|HSP77_YEAST Import motor subunit, mitochondrial OS=Saccharomyces cerevisiae (strain ATCC 204508 / S288c) OX=559292 GN=SSC1 PE=1 SV=1
26.9435787200928	26.586633682251	25.3720226287842	25.9867649078369	25.6519565582275	25.6396732330322	0.356945	1.28071	-0.614742	0.653047	0.0122833	1.00855			13	1	1	72.6	8	8	12.967	0	3.2596	29.3979305836617	17	1	1	1	1	1	1	26.5906368441674	25.7860870361328	23.8271617889404	23.1845893859863	22.3738479614258	23.0344123840332	22.1801643371582	0.0504218693561723	-0.0818379720052071	-0.146808003118598	P0C2H9	P0C2H9	60S ribosomal protein L31-B	RPL31B	sp|P0C2H9|RL31B_YEAST 60S ribosomal protein L31-B OS=Saccharomyces cerevisiae (strain ATCC 204508 / S288c) OX=559292 GN=RPL31B PE=1 SV=1
26.745735168457	26.6285362243652	27.7156143188477	27.6407909393311	27.2643661499023	27.6508197784424	0.117199	1.08463	0.0748234	1.05323	-0.386454	0.765008			83	5	0	58.5	4.7	0	198.57	0	74.895	30.2878004319796	52	4	5	5	5	5	5	24.0783052421164	22.6132659912109	19.513334274292	21.9653263092041	20.8552875518799	21.4665756225586	20.6620559692383	0.0506112286937933	-0.0648104349772147	-0.147332544580873	Q03434	Q03434	Transposon Ty1-ML2 Gag-Pol polyprotein;Capsid protein;Ty1 protease;Integrase;Reverse transcriptase/ribonuclease H	TY1B-ML2	sp|Q03434|YM12B_YEAST Transposon Ty1-ML2 Gag-Pol polyprotein OS=Saccharomyces cerevisiae (strain ATCC 204508 / S288c) OX=559292 GN=TY1B-ML2 PE=3 SV=2
28.1631259918213	27.7971153259277	26.0440807342529	26.3206195831299	26.3973789215088	26.108549118042	0.366011	1.28878	-0.276539	0.825569	0.28883	1.22165			8	8	7	44	44	33.9	12.182	0	58.904	30.4198104121015	51	8	7	5	5	5	5	27.8348479113803	27.1359443664551	25.4685230255127	23.8889255523682	22.8708515167236	23.8569030761719	22.7577819824219	0.0513880436946387	0.126100540161133	0.149482524638475	P00044	P00044	Cytochrome c iso-1	CYC1	sp|P00044|CYC1_YEAST Cytochrome c isoform 1 OS=Saccharomyces cerevisiae (strain ATCC 204508 / S288c) OX=559292 GN=CYC1 PE=1 SV=2
22.6444282531738	24.4301376342773	22.9185619354248	22.4396667480469	23.328275680542	22.340145111084	-1.78571	0.290033	0.478895	1.39368	0.988131	1.98361			4	4	4	10.7	10.7	10.7	72.189	0.00026288	2.5908	25.9736437703503	6	1	1	3	2	3	2	20.8862115806252	17.5151462554932	17.6789989471436	19.1825065612793	17.5845375061035	19.1786460876465	17.2507247924805	0.0515058390482303	-0.106227874755859	-0.149808284162376	P36056	P36056	37S ribosomal protein S22, mitochondrial	RSM22	sp|P36056|RT22_YEAST Probable S-adenosyl-L-methionine-dependent RNA methyltransferase RSM22, mitochondrial OS=Saccharomyces cerevisiae (strain ATCC 204508 / S288c) OX=559292 GN=RSM22 PE=1 SV=1
24.8097057342529	24.6126251220703	25.0095386505127	25.3069896697998	25.088207244873	25.0877628326416	0.197081	1.14638	-0.297451	0.813689	0.000444412	1.00031			20	19	19	24.5	23.7	23.7	115.69	0	46.217	28.0981333909936	57	8	15	12	9	9	10	22.5131849491123	21.2722454071045	18.7480945587158	20.2793483734131	18.7948722839355	19.8528060913086	18.3703289031982	0.05181923463942	-0.0333086649576835	-0.150674636433111	P39969	P39969	Protein BOI2	BOI2	sp|P39969|BOI2_YEAST Protein BOI2 OS=Saccharomyces cerevisiae (strain ATCC 204508 / S288c) OX=559292 GN=BOI2 PE=1 SV=1
25.11083984375	25.1637687683105	24.7747478485107	24.8641014099121	24.9330101013184	24.7165431976318	-0.0529289	0.963977	-0.0893536	0.939944	0.216467	1.16188			12	12	12	22.8	22.8	22.8	85.537	0	42.082	27.9875016979316	26	5	7	6	6	6	5	22.6299426457104	21.2170295715332	19.2768745422363	20.3061904907227	18.9670791625977	20.2813873291016	18.3521633148193	0.0520228883913042	0.0247281392415353	0.15123735805044	P38261	P38261	Exocyst complex component EXO84	EXO84	sp|P38261|EXO84_YEAST Exocyst complex component EXO84 OS=Saccharomyces cerevisiae (strain ATCC 204508 / S288c) OX=559292 GN=EXO84 PE=1 SV=1
21.2248210906982	22.307804107666	22.3176078796387	21.4774875640869	NaN	21.2558612823486	-1.08298	0.472052	0.84012	1.7902	#VALUE!	#VALUE!			3	3	3	11.9	11.9	11.9	33.964	0	2.7381	24.8667925633842	6	1	2	1	1	2	1	20.8668019942737	19.7693500518799	17.7443866729736	18.8710517883301	16.7566871643066	17.0129089355469	16.2229843139648	0.0527850882740046	0.0908301671346017	0.156533051426648	Q05541	Q05541	Non-structural maintenance of chromosome element 3	NSE3	sp|Q05541|NSE3_YEAST Non-structural maintenance of chromosome element 3 OS=Saccharomyces cerevisiae (strain ATCC 204508 / S288c) OX=559292 GN=NSE3 PE=1 SV=1
25.0392570495605	22.3692760467529	21.55908203125	22.9130744934082	21.1338291168213	21.8613967895508	2.66998	6.36421	-1.35399	0.391208	-0.727568	0.603921			7	7	7	8.6	8.6	8.6	110.71	0	9.4927	26.9724609999711	13	2	7	3	1	2	2	21.687054398675	21.2179775238037	18.3105239868164	17.423246383667	17.1981563568115	16.5602436065674	17.5303916931152	0.0530183055785844	0.196140289306641	0.153984889228993	Q12361	Q12361	G protein-coupled receptor GPR1	GPR1	sp|Q12361|GPR1_YEAST G protein-coupled receptor GPR1 OS=Saccharomyces cerevisiae (strain ATCC 204508 / S288c) OX=559292 GN=GPR1 PE=1 SV=1
28.9607181549072	29.3483657836914	30.4939060211182	30.2682991027832	30.7206954956055	30.2647247314453	-0.387648	0.764375	0.225607	1.16927	0.455971	1.37171			37	37	37	61.3	61.3	61.3	70.122	0	323.31	32.9541791231151	217	27	27	30	29	33	29	27.9097641990058	25.4188289642334	24.0790386199951	26.0705261230469	24.3051471710205	26.1271514892578	24.5808391571045	0.0534117923947964	0.0979766845703125	0.155069644623937	P07213	P07213	Mitochondrial import receptor subunit TOM70	TOM70	sp|P07213|TOM70_YEAST Mitochondrial import receptor subunit TOM70 OS=Saccharomyces cerevisiae (strain ATCC 204508 / S288c) OX=559292 GN=TOM70 PE=1 SV=2
22.3074970245361	22.3089427947998	22.2033519744873	22.5301952362061	21.8683471679688	21.6752128601074	-0.00144577	0.998998	-0.326843	0.797279	0.193134	1.14324			4	4	4	9.7	9.7	9.7	74.332	0	8.8709	25.1927232419397	13	1	3	2	2	2	1	20.334727199067	19.1423816680908	15.8803005218506	17.80712890625	17.7208728790283	17.7149829864502	14.4843196868896	0.0538199576432391	-0.0450515747070313	-0.156194066464292	P39904	P39904	Vacuolar protein sorting-associated protein 52	VPS52	sp|P39904|VPS52_YEAST Vacuolar protein sorting-associated protein 52 OS=Saccharomyces cerevisiae (strain ATCC 204508 / S288c) OX=559292 GN=VPS52 PE=1 SV=2
24.2915115356445	24.375904083252	23.4318599700928	22.1751461029053	22.5986213684082	NaN	-0.0843925	0.943182	1.25671	2.38951	#VALUE!	#VALUE!			12	12	12	17.6	17.6	17.6	100.62	0	18.719	26.8795853061003	16	7	9	7	2	3	1	21.5575871020319	20.880916595459	18.7046527862549	18.6839065551758	15.3082323074341	17.9128665924072	14.2802629470825	0.0538702710738551	0.165139198303223	0.159589698001082	Q07533	Q07533	Cytokinesis protein 3	CYK3	sp|Q07533|CYK3_YEAST Cytokinesis protein 3 OS=Saccharomyces cerevisiae (strain ATCC 204508 / S288c) OX=559292 GN=CYK3 PE=1 SV=1
24.3595771789551	24.2580337524414	21.1938209533691	20.7671699523926	22.8268508911133	NaN	0.101543	1.07292	0.426651	1.34411	#VALUE!	#VALUE!			3	3	3	16.6	16.6	16.6	20.118	0	5.4716	26.7263743005708	6	3	3	1	1	1	0	23.9190713525402	23.5426235198975	21.7585334777832	15.329270362854	13.6283311843872	15.3338537216187	NaN	0.0539737951868568	0.28081448872884	0.159880998954619	P32564	P32564	Protein SCM4	SCM4	sp|P32564|SCM4_YEAST Protein SCM4 OS=Saccharomyces cerevisiae (strain ATCC 204508 / S288c) OX=559292 GN=SCM4 PE=1 SV=1
23.8565235137939	23.8709831237793	24.6401424407959	23.9984321594238	23.246337890625	24.0658721923828	-0.0144596	0.990027	0.64171	1.56018	-0.819534	0.566625			8	8	8	25.4	25.4	25.4	38.868	0	10.373	27.2070412877364	12	5	6	4	3	4	4	22.7476562279244	21.7193355560303	19.121057510376	20.6026802062988	18.4289417266846	19.2359619140625	18.8011722564697	0.0542281799875421	-0.0640945434570313	-0.157317834209412	P25044	P25044	Tyrosine-protein phosphatase 1	PTP1	sp|P25044|PTP1_YEAST Tyrosine-protein phosphatase 1 OS=Saccharomyces cerevisiae (strain ATCC 204508 / S288c) OX=559292 GN=PTP1 PE=1 SV=1
20.2523422241211	20.0365753173828	19.6566905975342	NaN	NaN	19.7610282897949	0.215767	1.16132	#VALUE!	#VALUE!	#VALUE!	#VALUE!			2	2	2	3.8	3.8	3.8	81.768	0.00026205	2.4812	22.6749973651701	3	1	1	1	0	1	1	17.2826540897264	16.4740543365479	14.7132253646851	14.7875452041626	NaN	NaN	13.6960983276367	0.0551225951661528	0.0557146072387695	0.169784487639938	Q12204	Q12204	Probable phospholipase YOR022C, mitochondrial		sp|Q12204|YOR22_YEAST Probable phospholipase YOR022C, mitochondrial OS=Saccharomyces cerevisiae (strain ATCC 204508 / S288c) OX=559292 GN=YOR022C PE=1 SV=1
27.3053035736084	26.9433555603027	26.155590057373	26.54030418396	25.734691619873	25.9781684875488	0.361948	1.28516	-0.384714	0.765931	-0.243477	0.844707			8	8	8	28.1	28.1	28.1	32.264	0	33.367	29.7122887649157	27	4	8	6	5	6	6	26.127329544497	25.0696048736572	23.0935859680176	23.4811153411865	22.7029895782471	22.5439453125	22.0968055725098	0.0560757628170962	-0.0887476603190116	-0.162393831545435	P43639	P43639	Casein kinase II subunit beta	CKB1	sp|P43639|CSK2B_YEAST Casein kinase II subunit beta OS=Saccharomyces cerevisiae (strain ATCC 204508 / S288c) OX=559292 GN=CKB1 PE=1 SV=1
28.9565982818604	29.2927894592285	22.7776012420654	21.8315181732178	21.9065017700195	20.7966957092285	-0.336191	0.79213	0.946083	1.92663	1.10981	2.15817			19	19	19	66.5	66.5	66.5	38.952	0	113.53	30.9411872739862	55	19	18	2	2	2	1	26.5488964418396	25.8607921600342	25.0707931518555	19.7026081085205	17.8418712615967	19.4343681335449	17.6368656158447	0.0569831483008077	0.573232650756836	0.164880747006227	P04173	P04173	3-isopropylmalate dehydrogenase	LEU2	sp|P04173|LEU3_YEAST 3-isopropylmalate dehydrogenase OS=Saccharomyces cerevisiae (strain ATCC 204508 / S288c) OX=559292 GN=LEU2 PE=1 SV=4
25.0275764465332	25.1587314605713	25.9063739776611	26.1525173187256	26.3981800079346	26.3015937805176	-0.131155	0.9131	-0.246143	0.843147	0.0965862	1.06924			13	13	13	66.7	66.7	66.7	30.271	0	63.845	28.636267654481	54	7	8	11	12	11	9	25.0512982381569	22.4680938720703	20.928825378418	22.7314853668213	22.0650653839111	23.4740734100342	21.9197978973389	0.0603025656391318	-0.0935707092285156	-0.173945141134592	Q02204	Q02204	54S ribosomal protein L13, mitochondrial	MRPL13	sp|Q02204|RM13_YEAST 54S ribosomal protein L13, mitochondrial OS=Saccharomyces cerevisiae (strain ATCC 204508 / S288c) OX=559292 GN=MRPL13 PE=1 SV=2
23.4602642059326	23.4115753173828	NaN	18.7675247192383	19.2144718170166	20.5606689453125	0.0486889	1.03432	#VALUE!	#VALUE!	-1.3462	0.393327			2	2	2	12.7	12.7	12.7	17.895	0	4.3079	25.5101148642928	6	2	2	0	1	1	2	22.050659093361	21.5957775115967	19.8498477935791	NaN	13.743992805481	15.211051940918	17.4439468383789	0.0611714082591058	0.42411168416341	0.180009814927454	Q03020	Q03020	Iron sulfur cluster assembly protein 1, mitochondrial	ISU1	sp|Q03020|ISU1_YEAST Iron sulfur cluster assembly protein 1, mitochondrial OS=Saccharomyces cerevisiae (strain ATCC 204508 / S288c) OX=559292 GN=ISU1 PE=1 SV=1
26.2403087615967	26.0810718536377	29.005521774292	29.4201526641846	28.9010410308838	29.4145774841309	0.159237	1.1167	-0.414631	0.750211	-0.513536	0.700503			36	24	18	56.7	38.8	30.4	69.65	0	119.94	31.3137062122205	152	13	12	21	23	22	24	26.2262260743091	23.1706314086914	20.3276176452637	24.3396015167236	23.6025218963623	24.2500305175781	23.7208805084229	0.0620794717297707	-0.256310145060223	-0.178776156976514	P22202	P22202	Heat shock protein SSA4	SSA4	sp|P22202|HSP74_YEAST Heat shock protein SSA4 OS=Saccharomyces cerevisiae (strain ATCC 204508 / S288c) OX=559292 GN=SSA4 PE=1 SV=3
NaN	21.5911731719971	21.3176078796387	22.5775470733643	21.8207702636719	20.9045543670654	#VALUE!	#VALUE!	-1.25994	0.417562	0.916216	1.88716			2	2	2	4	4	4	91.684	0	5.1223	24.061263725978	2	1	0	2	1	2	2	18.7393521142303	NaN	14.28395652771	17.0575904846191	16.3437232971191	17.3012638092041	15.1597528457642	0.0634457311963818	-0.121902465820313	-0.186320416961026	P38148	P38148	Dual specificity protein phosphatase PPS1	PPS1	sp|P38148|PPS1_YEAST Dual specificity protein phosphatase PPS1 OS=Saccharomyces cerevisiae (strain ATCC 204508 / S288c) OX=559292 GN=PPS1 PE=3 SV=1
23.2727012634277	23.1692085266113	NaN	22.2134742736816	21.8826332092285	22.7037925720215	0.103493	1.07437	#VALUE!	#VALUE!	-0.821159	0.565987			6	6	6	35.3	35.3	35.3	30.472	0	5.7797	25.7940199606498	10	2	5	0	2	1	3	21.9866600791644	21.4228572845459	18.9724197387695	NaN	17.8998870849609	18.2582893371582	18.0526103973389	0.0638389020522963	-0.117824554443359	-0.187408987990882	P46947	P46947	Pre-mRNA-splicing factor CWC26	BUD13	sp|P46947|CWC26_YEAST Pre-mRNA-splicing factor CWC26 OS=Saccharomyces cerevisiae (strain ATCC 204508 / S288c) OX=559292 GN=BUD13 PE=1 SV=1
30.4662609100342	30.7460708618164	31.0636825561523	30.8755493164063	31.0387210845947	30.8371810913086	-0.27981	0.8237	0.188133	1.13929	0.20154	1.14993			28	28	28	62.2	62.2	62.2	58.607	0	293	33.8050126818395	210	23	23	27	27	27	26	28.8981028604227	27.2514209747314	25.5596714019775	26.7751750946045	25.1897487640381	26.4505290985107	25.4617328643799	0.0640657590820445	0.03662109375	0.184159186343284	P07251	P07251	ATP synthase subunit alpha, mitochondrial	ATP1	sp|P07251|ATPA_YEAST ATP synthase subunit alpha, mitochondrial OS=Saccharomyces cerevisiae (strain ATCC 204508 / S288c) OX=559292 GN=ATP1 PE=1 SV=5
28.9503536224365	29.1373615264893	29.0478858947754	28.8077163696289	28.8558177947998	28.8435897827148	-0.187008	0.878426	0.24017	1.18113	0.012228	1.00851			22	22	22	64.3	64.3	64.3	50.227	0	275.43	31.9338561877253	152	18	18	20	20	19	22	27.4102977482881	25.9093055725098	24.3664627075195	25.19704246521	23.6447143554688	24.6203651428223	23.962610244751	0.0641410415085409	0.0217965443929025	0.184362853736938	P07256	P07256	Cytochrome b-c1 complex subunit 1, mitochondrial	COR1	sp|P07256|QCR1_YEAST Cytochrome b-c1 complex subunit 1, mitochondrial OS=Saccharomyces cerevisiae (strain ATCC 204508 / S288c) OX=559292 GN=COR1 PE=1 SV=1
22.7093772888184	22.8133697509766	22.643196105957	22.6404399871826	22.4315795898438	22.4099197387695	-0.103992	0.930455	0.00275612	1.00191	0.0216599	1.01513			5	5	5	12.8	12.8	12.8	65.88	0	11.11	25.2226195188365	12	1	2	3	3	5	4	20.1350829804549	16.7217407226563	16.2760887145996	18.5369682312012	17.5918579101563	17.8279247283936	17.2282543182373	0.064183078145652	-0.0265254974365234	-0.184476567478327	P39965	P39965	Probable proline--tRNA ligase, mitochondrial	AIM10	sp|P39965|SYPM_YEAST Probable proline--tRNA ligase, mitochondrial OS=Saccharomyces cerevisiae (strain ATCC 204508 / S288c) OX=559292 GN=AIM10 PE=1 SV=1
25.8123035430908	25.8611221313477	25.4293079376221	25.3386497497559	25.4761161804199	25.4036655426025	-0.0488186	0.966728	0.0906582	1.06486	0.0724506	1.0515			11	11	11	49.7	49.7	49.7	34.113	0	33.785	28.8042126717723	28	9	9	5	3	5	3	24.4822845768849	23.490816116333	22.1550846099854	21.2816696166992	19.25146484375	21.5715885162354	19.3920707702637	0.0650568407485276	0.0380967458089181	0.186838372308894	P38885	P38885	Altered inheritance of mitochondria protein 46, mitochondrial	AIM46	sp|P38885|AIM46_YEAST Altered inheritance of mitochondria protein 46, mitochondrial OS=Saccharomyces cerevisiae (strain ATCC 204508 / S288c) OX=559292 GN=AIM46 PE=1 SV=1
NaN	NaN	22.0864105224609	22.6906604766846	21.3546085357666	21.1022624969482	#VALUE!	#VALUE!	-0.60425	0.657813	0.252346	1.19114			4	4	4	6.8	6.8	6.8	96.824	0	4.5259	23.5713795470409	7	0	0	1	3	2	2	18.0477736092373	NaN	NaN	15.6059131622314	16.6510238647461	15.6283311843872	16.0434761047363	0.0659380401919562	-0.175951957702637	-0.201218012074971	P38863	P38863	Spindle pole body component SPC97	SPC97	sp|P38863|SPC97_YEAST Spindle pole body component SPC97 OS=Saccharomyces cerevisiae (strain ATCC 204508 / S288c) OX=559292 GN=SPC97 PE=1 SV=1
25.7927799224854	25.787633895874	25.5780200958252	25.887788772583	25.9342708587646	25.6965999603271	0.00514603	1.00357	-0.309769	0.806771	0.237671	1.17909			12	12	7	37.4	37.4	27.9	45.859	0	26.368	28.8183320812219	44	7	6	9	6	9	7	24.5703954242295	23.343807220459	21.6117572784424	21.7541770935059	20.4231643676758	21.7885551452637	21.2514762878418	0.0662871335700794	-0.0223172505696603	-0.190158029211233	Q06178	Q06178	Nicotinamide/nicotinic acid mononucleotide adenylyltransferase 1	NMA1	sp|Q06178|NMA1_YEAST Nicotinamide/nicotinic acid mononucleotide adenylyltransferase 1 OS=Saccharomyces cerevisiae (strain ATCC 204508 / S288c) OX=559292 GN=NMA1 PE=1 SV=1
22.5316715240479	22.0483989715576	20.8290405273438	NaN	NaN	20.8959293365479	0.483273	1.39791	#VALUE!	#VALUE!	#VALUE!	#VALUE!			3	3	3	10.6	10.6	10.6	34.206	0.00026344	2.624	24.6597067727431	4	2	1	1	0	0	2	20.5722820341638	19.9753322601318	18.3898658752441	17.1818504333496	NaN	NaN	15.1395111083984	0.066390213647603	0.208191871643066	0.202521214339958	Q03028	Q03028	Mitochondrial 2-oxodicarboxylate carrier 1	ODC1	sp|Q03028|ODC1_YEAST Mitochondrial 2-oxodicarboxylate carrier 1 OS=Saccharomyces cerevisiae (strain ATCC 204508 / S288c) OX=559292 GN=ODC1 PE=1 SV=1
NaN	23.126443862915	23.3929653167725	23.5966205596924	23.582447052002	23.9188899993896	#VALUE!	#VALUE!	-0.203655	0.868348	-0.336443	0.791992			5	5	5	6	6	6	145.64	0	2.9474	25.4316694959698	7	3	0	1	2	1	3	19.3655748863901	NaN	16.5706272125244	15.5079183578491	15.3822860717773	15.3698015213013	18.7683334350586	0.0666772455482147	-0.0596119562784843	-0.195247068279059	P53125	P53125	Imitation switch two complex protein 1	ITC1	sp|P53125|ITC1_YEAST Imitation switch two complex protein 1 OS=Saccharomyces cerevisiae (strain ATCC 204508 / S288c) OX=559292 GN=ITC1 PE=1 SV=1
22.6474170684814	22.6310977935791	22.2334480285645	22.4464473724365	22.1547431945801	21.7861633300781	0.0163193	1.01138	-0.212999	0.862742	0.36858	1.29108			3	3	3	6	6	6	78.339	0	9.5011	25.6316753194196	9	3	3	2	1	2	2	20.5441569760229	19.6216373443604	18.1976299285889	17.775842666626	14.9516038894653	16.8437747955322	15.5509271621704	0.0669461504052552	0.0572999318440743	0.191933429976533	P24482	P24482	DNA polymerase epsilon subunit B	DPB2	sp|P24482|DPB2_YEAST DNA polymerase epsilon subunit B OS=Saccharomyces cerevisiae (strain ATCC 204508 / S288c) OX=559292 GN=DPB2 PE=1 SV=3
27.7081336975098	27.7483596801758	27.6510944366455	27.7423973083496	27.9044342041016	27.8197631835938	-0.040226	0.972503	-0.0913029	0.938675	0.084671	1.06045			40	40	40	42.4	42.4	42.4	127.11	0	212.2	30.6594890238874	141	26	25	26	24	28	25	24.705301219932	22.8002548217773	21.3410949707031	22.7089347839355	21.2103862762451	22.4411888122559	21.205322265625	0.0675879476634252	-0.0156192779541016	-0.193660572332074	P36775	P36775	Lon protease homolog, mitochondrial	PIM1	sp|P36775|LONM_YEAST Lon protease homolog, mitochondrial OS=Saccharomyces cerevisiae (strain ATCC 204508 / S288c) OX=559292 GN=PIM1 PE=1 SV=2
25.1372737884521	NaN	24.9100379943848	24.8187046051025	25.7374534606934	25.5379524230957	#VALUE!	#VALUE!	0.0913334	1.06535	0.199501	1.1483			3	3	3	29.3	29.3	29.3	19.855	0	42.575	27.6167378414275	10	1	1	2	2	2	2	24.4468268595958	18.2466468811035	16.6151123046875	22.2148971557617	20.2218742370605	23.4337711334229	22.2635612487793	0.0683901517921663	0.0832599004109689	0.199960087749942	P42844	P42844	Mitochondrial protein import protein ZIM17	ZIM17	sp|P42844|ZIM17_YEAST Mitochondrial protein import protein ZIM17 OS=Saccharomyces cerevisiae (strain ATCC 204508 / S288c) OX=559292 GN=ZIM17 PE=1 SV=2
24.4139003753662	24.0739002227783	24.586633682251	25.1446437835693	24.7821674346924	24.7616214752197	0.34	1.26576	-0.55801	0.679238	0.020546	1.01434			7	7	7	54.1	54.1	54.1	18.855	0	22.138	27.5350465575782	14	3	4	4	4	5	5	24.0756149389409	22.3380508422852	19.7158203125	21.4170989990234	21.7211723327637	21.7363662719727	20.7517261505127	0.0695649775831677	-0.0658213297526054	-0.19896945406486	P43594	P43594	MICOS complex subunit MIC19	MIC19	sp|P43594|MIC19_YEAST MICOS complex subunit MIC19 OS=Saccharomyces cerevisiae (strain ATCC 204508 / S288c) OX=559292 GN=MIC19 PE=1 SV=1
27.4084358215332	27.0800952911377	26.2692623138428	26.6590805053711	26.395191192627	26.5695114135742	0.328341	1.25557	-0.389818	0.763226	-0.17432	0.886185			3	3	3	54.3	54.3	54.3	8.2776	0	37.07	29.9603034628091	27	3	3	2	3	2	3	28.9602482178287	28.026912689209	26.661937713623	25.622013092041	24.6163311004639	25.1382122039795	24.7557258605957	0.0698666863106886	-0.0785992940266951	-0.199778108008762	P22139	P22139	DNA-directed RNA polymerases I, II, and III subunit RPABC5	RPB10	sp|P22139|RPAB5_YEAST DNA-directed RNA polymerases I, II, and III subunit RPABC5 OS=Saccharomyces cerevisiae (strain ATCC 204508 / S288c) OX=559292 GN=RPB10 PE=1 SV=2
NaN	NaN	24.4083385467529	24.3219604492188	23.7606067657471	24.0008411407471	#VALUE!	#VALUE!	0.0863781	1.0617	-0.240234	0.846608			7	7	7	7.6	7.6	7.6	152.62	0	14.763	25.9063043596427	14	0	0	4	6	5	5	19.8188442712305	NaN	NaN	17.8969345092773	17.7746849060059	17.6850357055664	17.9071254730225	0.0699717756998232	-0.0769281387329102	-0.212813778553295	P35177	P35177	Transcriptional activator SPT7	SPT7	sp|P35177|SPT7_YEAST Transcriptional activator SPT7 OS=Saccharomyces cerevisiae (strain ATCC 204508 / S288c) OX=559292 GN=SPT7 PE=1 SV=1
24.1110000610352	23.742525100708	25.150505065918	25.6763477325439	25.124116897583	25.3869953155518	0.368475	1.29099	-0.525843	0.694553	-0.262878	0.833423			5	5	5	36.5	36.5	36.5	19.168	0	25.156	27.6707416006337	14	3	3	2	4	3	4	24.5008165991914	22.5486087799072	20.7907428741455	21.8968181610107	22.0315361022949	21.8506412506104	21.8640460968018	0.070788172136713	-0.140082041422527	-0.202245444218952	Q07688	Q07688	Phosphorelay intermediate protein YPD1	YPD1	sp|Q07688|YPD1_YEAST Phosphorelay intermediate protein YPD1 OS=Saccharomyces cerevisiae (strain ATCC 204508 / S288c) OX=559292 GN=YPD1 PE=1 SV=1
30.4199104309082	30.5765972137451	29.8095893859863	29.6408424377441	29.8006992340088	29.57546043396	-0.156687	0.897083	0.168747	1.12408	0.225239	1.16897			36	36	36	71.2	71.2	71.2	74.375	0	323.31	33.1859181335145	246	32	29	29	22	25	24	27.9764544327222	26.8960819244385	25.4891624450684	25.1626167297363	23.5173721313477	24.7897987365723	23.6897659301758	0.0724229206489016	0.0790996551513672	0.206613470507663	P36013	P36013	NAD-dependent malic enzyme, mitochondrial	MAE1	sp|P36013|MAOM_YEAST NAD-dependent malic enzyme, mitochondrial OS=Saccharomyces cerevisiae (strain ATCC 204508 / S288c) OX=559292 GN=MAE1 PE=1 SV=1
27.4753742218018	27.5397129058838	21.3675174713135	22.3800468444824	21.4724884033203	22.0783538818359	-0.0643387	0.956384	-1.01253	0.495676	-0.605865	0.657077			10	10	10	30.8	30.8	30.8	32.173	0	44.677	29.610485556004	26	8	10	2	1	1	3	25.610485556004	25.2418003082275	23.2264823913574	18.9261627197266	18.7692050933838	17.9742126464844	19.0314426422119	0.0732446746455048	-0.560911178588867	-0.208804813790927	P38152	P38152	Tricarboxylate transport protein	CTP1	sp|P38152|TXTP_YEAST Tricarboxylate transport protein OS=Saccharomyces cerevisiae (strain ATCC 204508 / S288c) OX=559292 GN=CTP1 PE=2 SV=3
26.899543762207	27.2707061767578	28.1788787841797	27.981689453125	28.4962520599365	27.979455947876	-0.371162	0.773159	0.197189	1.14646	0.516796	1.43077			17	17	17	54.7	54.7	54.7	30.25	0	173.77	30.7092348502049	69	12	12	13	13	13	11	26.5393131360162	24.103816986084	22.6050338745117	24.7041931152344	22.9987945556641	24.6851196289063	23.3139591217041	0.0739559860735642	0.114274342854817	0.210699297167046	P25343	P25343	Reduced viability upon starvation protein 161	RVS161	sp|P25343|RV161_YEAST Reduced viability upon starvation protein 161 OS=Saccharomyces cerevisiae (strain ATCC 204508 / S288c) OX=559292 GN=RVS161 PE=1 SV=1
23.907657623291	24.2867965698242	25.5964202880859	25.261194229126	25.552770614624	25.1084499359131	-0.379139	0.768896	0.335226	1.26158	0.444321	1.36067			10	10	10	35.5	35.5	35.5	36.728	0	28.689	27.7835674064366	33	4	4	8	8	8	8	23.6961482749868	20.5605754852295	20.023099899292	22.0882244110107	20.6291637420654	21.665225982666	20.5844459533691	0.0740368675259024	0.133469263712566	0.210914576747471	P10662	P10662	37S ribosomal protein MRP1, mitochondrial	MRP1	sp|P10662|RT01_YEAST 37S ribosomal protein MRP1, mitochondrial OS=Saccharomyces cerevisiae (strain ATCC 204508 / S288c) OX=559292 GN=MRP1 PE=1 SV=2
26.3244190216064	26.1111583709717	26.7171192169189	26.8161659240723	26.8372554779053	26.776180267334	0.213261	1.15931	-0.0990467	0.93365	0.0610752	1.04324			14	14	14	32.7	32.7	32.7	68.663	0	74.73	29.4627355592315	73	9	9	12	12	11	13	24.7078305080616	22.7565612792969	20.9658546447754	22.5386505126953	21.3812618255615	22.5000133514404	21.744312286377	0.0742930812605631	0.0584297180175781	0.211596347849778	Q08925	Q08925	RNA-binding protein MRN1	MRN1	sp|Q08925|MRN1_YEAST RNA-binding protein MRN1 OS=Saccharomyces cerevisiae (strain ATCC 204508 / S288c) OX=559292 GN=MRN1 PE=1 SV=1
22.7201290130615	22.437255859375	21.2783832550049	NaN	NaN	21.9075660705566	0.282873	1.21662	#VALUE!	#VALUE!	#VALUE!	#VALUE!			2	2	2	9.3	9.3	9.3	29.74	0	2.8763	25.1386414749128	6	2	2	1	0	0	1	21.2317508793043	20.7540130615234	18.9601097106934	16.7841739654541	NaN	NaN	16.1218566894531	0.074399457471237	-0.173154830932617	-0.225466506117117	P53769	P53769	Pre-mRNA-splicing factor CWC24	CWC24	sp|P53769|CWC24_YEAST Pre-mRNA-splicing factor CWC24 OS=Saccharomyces cerevisiae (strain ATCC 204508 / S288c) OX=559292 GN=CWC24 PE=1 SV=1
25.3028831481934	25.5124073028564	24.8008975982666	24.4526195526123	24.6802444458008	24.5727672576904	-0.209524	0.864822	0.348278	1.27304	0.107477	1.07734			4	4	4	21.9	21.9	21.9	28.567	0	14.501	28.1327123013772	11	4	4	2	2	2	1	25.1326926927487	24.1040554046631	22.2662506103516	22.4607391357422	20.7802066802979	22.0807304382324	20.6992225646973	0.0747910148649261	0.0820770263671875	0.212920520485752	P00410	P00410	Cytochrome c oxidase subunit 2	COX2	sp|P00410|COX2_YEAST Cytochrome c oxidase subunit 2 OS=Saccharomyces cerevisiae (strain ATCC 204508 / S288c) OX=559292 GN=COX2 PE=1 SV=1
23.0621528625488	23.294319152832	22.759916305542	22.8517093658447	23.1241722106934	22.65940284729	-0.232166	0.851356	-0.0917931	0.938356	0.464769	1.3801			5	5	5	9.2	9.2	9.2	84.372	0	6.6428	25.8213584576609	7	2	3	4	4	5	4	20.2364300208126	18.2781677246094	15.9734954833984	18.3032722473145	17.0508060455322	17.8558044433594	17.2566318511963	0.075291546072693	0.0469366709391288	0.214250536219753	P49956	P49956	Chromosome transmission fidelity protein 18	CTF18	sp|P49956|CTF18_YEAST Chromosome transmission fidelity protein 18 OS=Saccharomyces cerevisiae (strain ATCC 204508 / S288c) OX=559292 GN=CTF18 PE=1 SV=1
NaN	NaN	21.4997463226318	21.5683441162109	21.7735023498535	21.6396675109863	#VALUE!	#VALUE!	-0.0685978	0.953564	0.133835	1.09721			1	1	1	20.3	20.3	20.3	9.3517	0	4.0266	23.590465526451	2	0	0	1	1	1	1	21.5903969936678	NaN	NaN	20.0282344818115	18.8094539642334	20.0479335784912	19.0557651519775	0.0762054751292713	0.032618522644043	0.230605431415599	Q3E785	Q3E785	Succinate dehydrogenase assembly factor 1, mitochondrial	SDH6	sp|Q3E785|SDHF1_YEAST Succinate dehydrogenase assembly factor 1, mitochondrial OS=Saccharomyces cerevisiae (strain ATCC 204508 / S288c) OX=559292 GN=SDH6 PE=1 SV=1
26.3826637268066	26.64182472229	31.2392253875732	32.2880744934082	31.7457103729248	32.0777244567871	-0.259161	0.835574	-1.04885	0.483354	-0.332014	0.794427			3	3	3	21.3	21.3	21.3	21.571	0	11.372	33.675771720457	11	3	3	2	2	2	2	31.3538961932987	23.7939205169678	22.2956638336182	29.2563571929932	29.3592166900635	29.4357128143311	29.3167190551758	0.0763848118589692	-0.546674728393555	-0.217151874858874	Q04839	Q04839	mRNA transport factor GFD1	GFD1	sp|Q04839|GFD1_YEAST mRNA transport factor GFD1 OS=Saccharomyces cerevisiae (strain ATCC 204508 / S288c) OX=559292 GN=GFD1 PE=1 SV=1
22.8888893127441	22.5381774902344	22.1658248901367	NaN	22.5872859954834	22.4349937438965	0.350712	1.27519	#VALUE!	#VALUE!	0.152292	1.11133			3	3	3	9	9	9	67.775	0	7.0603	25.2849624407097	6	2	2	2	1	2	2	20.6411238954512	19.1453456878662	18.5404529571533	17.9254970550537	NaN	17.8738765716553	17.4973220825195	0.0765274476391255	0.0607477823893241	0.222178260069753	Q01448	Q01448	Histone promoter control protein 2	HPC2	sp|Q01448|HPC2_YEAST Histone promoter control protein 2 OS=Saccharomyces cerevisiae (strain ATCC 204508 / S288c) OX=559292 GN=HPC2 PE=1 SV=2
29.1183261871338	29.1889324188232	28.859582901001	28.7796592712402	28.7744216918945	28.6585025787354	-0.0706062	0.952238	0.0799236	1.05696	0.115919	1.08367			20	20	20	67.2	67.2	67.2	44.468	0	135.02	31.957504024933	165	17	18	18	17	18	19	27.7875582666327	26.5120315551758	24.7667350769043	25.1470909118652	23.7764568328857	25.0994892120361	24.25075340271	0.0769579064785236	0.0417455037434884	0.21867075222	P48015	P48015	Aminomethyltransferase, mitochondrial	GCV1	sp|P48015|GCST_YEAST Aminomethyltransferase, mitochondrial OS=Saccharomyces cerevisiae (strain ATCC 204508 / S288c) OX=559292 GN=GCV1 PE=1 SV=2
23.1066932678223	24.4424667358398	23.869478225708	23.9340019226074	23.2682800292969	22.3166408538818	-1.33577	0.39618	-0.0645237	0.956261	0.951639	1.93407			8	8	8	9.9	9.9	9.9	111.92	0	6.2501	26.6855206882023	12	4	5	2	1	2	4	20.9575895400385	18.9634437561035	18.2355651855469	19.288703918457	14.7890748977661	18.7984218597412	16.4883575439453	0.0772360760484686	-0.14955266316732	-0.219407489232669	P32504	P32504	Centromere DNA-binding protein complex CBF3 subunit A	CBF2	sp|P32504|CBF3A_YEAST Centromere DNA-binding protein complex CBF3 subunit A OS=Saccharomyces cerevisiae (strain ATCC 204508 / S288c) OX=559292 GN=CBF2 PE=1 SV=1
26.2802791595459	25.2991847991943	23.7580661773682	23.9550895690918	24.5760021209717	NaN	0.981094	1.97396	-0.197023	0.872349	#VALUE!	#VALUE!			13	13	8	27.3	27.3	21	66.147	0	54.518	28.5425564685883	31	7	13	4	3	4	1	24.150194766912	23.8057746887207	20.5963249206543	19.8153305053711	19.0611553192139	19.7791328430176	NaN	0.0778583339274934	0.244311968485516	0.225785871110878	P22204	P22204	Cell cycle protein kinase DBF2	DBF2	sp|P22204|DBF2_YEAST Cell cycle protein kinase DBF2 OS=Saccharomyces cerevisiae (strain ATCC 204508 / S288c) OX=559292 GN=DBF2 PE=1 SV=3
28.3656120300293	28.6127014160156	24.0343952178955	24.2925643920898	24.3171367645264	25.0926094055176	-0.247089	0.842595	-0.258169	0.836148	-0.775473	0.584197			17	17	17	54.6	54.6	54.6	46.681	0	93.116	30.4905631850234	41	12	14	3	4	3	4	25.9670165299065	25.4470481872559	23.6729278564453	20.052583694458	18.64772605896	18.4609603881836	22.1380558013916	0.0779897068153797	-0.426910400390625	-0.221401863436043	P18544	P18544	Acetylornithine aminotransferase, mitochondrial	ARG8	sp|P18544|ARGD_YEAST Acetylornithine aminotransferase, mitochondrial OS=Saccharomyces cerevisiae (strain ATCC 204508 / S288c) OX=559292 GN=ARG8 PE=1 SV=1
24.5618572235107	24.1718826293945	23.3359260559082	23.1912479400635	22.4271869659424	23.4211120605469	0.389975	1.31037	0.144678	1.10548	-0.993925	0.50211			12	12	12	9.8	9.8	9.8	162.19	0	11.479	27.1673913461993	28	8	10	4	4	3	5	20.7924122133253	20.2434196472168	17.8200912475586	17.4988803863525	15.2467775344849	15.6948747634888	16.0135192871094	0.0786917040935722	-0.153090794881184	-0.223257462547351	Q12267	Q12267	Structural maintenance of chromosomes protein 4	SMC4	sp|Q12267|SMC4_YEAST Structural maintenance of chromosomes protein 4 OS=Saccharomyces cerevisiae (strain ATCC 204508 / S288c) OX=559292 GN=SMC4 PE=1 SV=1
26.1468200683594	26.2819766998291	26.9114799499512	26.6662788391113	27.0172271728516	26.9060974121094	-0.135157	0.910571	0.245201	1.18526	0.11113	1.08007			18	18	18	42	42	42	48.854	0	143.43	29.5854168073463	92	14	14	15	12	13	15	24.8305024411044	22.8408813476563	21.6494369506836	22.875883102417	20.7340507507324	22.5239410400391	21.7639312744141	0.0790084167044987	0.0737247467041016	0.224093961860101	Q01852	Q01852	Mitochondrial import inner membrane translocase subunit TIM44	TIM44	sp|Q01852|TIM44_YEAST Mitochondrial import inner membrane translocase subunit TIM44 OS=Saccharomyces cerevisiae (strain ATCC 204508 / S288c) OX=559292 GN=TIM44 PE=1 SV=1
23.4154491424561	24.1403198242188	25.2686729431152	25.1276245117188	25.3626899719238	25.2676010131836	-0.724871	0.605051	0.141048	1.10271	0.095089	1.06813			11	11	11	44.7	44.7	44.7	36.851	0	25.234	27.6200287097487	32	4	3	9	7	9	6	23.3721221777558	20.2084827423096	19.550464630127	21.6482963562012	20.1877346038818	21.528694152832	20.3867969512939	0.0790654021555998	-0.162911097208656	-0.224244427243315	P32453	P32453	Protein ATP11, mitochondrial	ATP11	sp|P32453|ATP11_YEAST Protein ATP11, mitochondrial OS=Saccharomyces cerevisiae (strain ATCC 204508 / S288c) OX=559292 GN=ATP11 PE=1 SV=1
24.7440147399902	25.2234306335449	25.655481338501	25.4907855987549	25.6606597900391	25.1277027130127	-0.479416	0.717268	0.164696	1.12093	0.532957	1.44689			5	5	5	19.8	19.8	19.8	21.276	0	12.648	28.4426491264077	26	5	5	4	4	4	3	25.8576866256866	24.2355690002441	23.3937511444092	23.6630783081055	21.8994750976563	23.2353496551514	21.4979457855225	0.0793078664288765	0.07274564107259	0.224884483568116	P40070	P40070	U6 snRNA-associated Sm-like protein LSm4	LSM4	sp|P40070|LSM4_YEAST U6 snRNA-associated Sm-like protein LSm4 OS=Saccharomyces cerevisiae (strain ATCC 204508 / S288c) OX=559292 GN=LSM4 PE=1 SV=1
24.606876373291	23.2436084747314	23.9213428497314	24.7005996704102	24.4195041656494	24.6526679992676	1.36327	2.57267	-0.779257	0.582667	-0.233164	0.850767			12	12	12	30.7	30.7	30.7	70.689	0	43.377	27.3588395044978	19	6	8	6	5	5	7	22.6583997863567	21.6267604827881	18.4088115692139	19.3514747619629	19.2200336456299	19.8346385955811	19.6438732147217	0.0793443235959889	0.116949081420898	0.224980701992055	Q07655	Q07655	Protein WHI4	WHI4	sp|Q07655|WHI4_YEAST Protein WHI4 OS=Saccharomyces cerevisiae (strain ATCC 204508 / S288c) OX=559292 GN=WHI4 PE=1 SV=1
21.9639167785645	21.9351348876953	20.9909934997559	21.5297908782959	21.4146747589111	21.1500396728516	0.0287819	1.02015	-0.538797	0.688344	0.264635	1.20133			2	2	2	6	6	6	60.519	0.0081218	1.5506	24.9867208309792	7	2	1	1	1	1	1	20.1288049242429	19.548490524292	17.6359443664551	15.816333770752	14.8308620452881	15.9764518737793	14.5904111862183	0.079823164701303	-0.0817934672037737	-0.226243957601514	P42944	P42944	Protein GZF3	GZF3	sp|P42944|GZF3_YEAST Protein GZF3 OS=Saccharomyces cerevisiae (strain ATCC 204508 / S288c) OX=559292 GN=GZF3 PE=1 SV=1
22.8401889801025	22.9811992645264	24.8836231231689	24.9443607330322	24.9811553955078	25.4841918945313	-0.14101	0.906884	-0.0607376	0.958774	-0.503036	0.70562			14	14	14	27	27	27	79.959	0	45.918	27.4720453704583	37	3	4	12	9	10	8	22.1866462513296	19.7568664550781	16.923002243042	20.6341381072998	18.9780178070068	20.1086578369141	18.899829864502	0.0803342023283059	-0.234928131103516	-0.227591107899108	P25298	P25298	mRNA 3-end-processing protein RNA14	RNA14	sp|P25298|RNA14_YEAST mRNA 3-end-processing protein RNA14 OS=Saccharomyces cerevisiae (strain ATCC 204508 / S288c) OX=559292 GN=RNA14 PE=1 SV=2
24.0515060424805	24.0620880126953	23.7256717681885	23.9445838928223	24.1429710388184	23.8140163421631	-0.010582	0.992692	-0.218912	0.859213	0.328955	1.2561			12	12	12	14.3	14.3	14.3	121.79	0	42.126	27.0855765168832	31	7	5	7	6	7	7	21.470851477894	20.137336730957	19.2342090606689	18.5265369415283	16.6178398132324	18.7374057769775	17.7558403015137	0.0804357024213438	0.0331535339355469	0.227858544989898	P12383	P12383	Transcription factor PDR1	PDR1	sp|P12383|PDR1_YEAST Transcription factor PDR1 OS=Saccharomyces cerevisiae (strain ATCC 204508 / S288c) OX=559292 GN=PDR1 PE=1 SV=2
26.2019481658936	26.5798892974854	26.1496143341064	25.7304744720459	25.9839839935303	25.8364143371582	-0.377941	0.769535	0.41914	1.33713	0.14757	1.1077			18	18	18	46.5	46.5	46.5	50.265	0	51.897	29.239452418819	63	15	14	11	11	11	11	24.6544717078846	23.5231285095215	22.1063575744629	21.9739322662354	20.2170295715332	21.5158100128174	20.5176849365234	0.0807359633487569	0.0629227956136056	0.228649438137334	P36101	P36101	tRNA threonylcarbamoyladenosine dehydratase 2	TCD2	sp|P36101|TCD2_YEAST tRNA threonylcarbamoyladenosine dehydratase 2 OS=Saccharomyces cerevisiae (strain ATCC 204508 / S288c) OX=559292 GN=TCD2 PE=1 SV=1
24.6201400756836	23.5449829101563	24.0206432342529	24.679386138916	23.8654251098633	24.5772132873535	1.07516	2.10695	-0.658743	0.63343	-0.711788	0.610563			10	10	10	19.7	19.7	19.7	90.797	0	23.02	27.0834476758365	28	5	3	4	7	5	7	21.7258804539062	20.2652206420898	19.3227424621582	18.2191123962402	18.7382316589355	18.5056800842285	18.740571975708	0.0810197282948688	-0.0984579722086565	-0.229396540204876	P46949	P46949	Protein FYV8	FYV8	sp|P46949|FYV8_YEAST Protein FYV8 OS=Saccharomyces cerevisiae (strain ATCC 204508 / S288c) OX=559292 GN=FYV8 PE=1 SV=1
29.4285221099854	29.8267650604248	28.7442588806152	28.7549362182617	28.8727626800537	28.7504711151123	-0.398243	0.758782	-0.0106773	0.992626	0.122292	1.08846			24	24	23	54.7	54.7	50.5	53.359	0	145.61	32.2193675079793	144	22	21	18	17	18	17	27.5754968920476	26.3889331817627	25.1313591003418	24.6168918609619	23.1338768005371	24.6642723083496	23.7247352600098	0.0813229150286408	-0.0955429077148438	-0.230194411552595	P00890	P00890	Citrate synthase, mitochondrial	CIT1	sp|P00890|CISY1_YEAST Citrate synthase, mitochondrial OS=Saccharomyces cerevisiae (strain ATCC 204508 / S288c) OX=559292 GN=CIT1 PE=1 SV=2
26.4165287017822	25.8536949157715	25.3594093322754	25.8042488098145	25.8232555389404	26.1693992614746	0.562834	1.47717	-0.444839	0.734666	-0.346144	0.786684			3	3	3	4.7	4.7	4.7	166.11	0	3.5894	29.0347252176797	8	1	1	2	2	1	2	23.0123626512824	21.9908885955811	19.8062324523926	19.8429756164551	19.0029201507568	20.0527172088623	19.6499366760254	0.0823328138385925	-0.0760498046875	-0.232849368914568	P0CE41	P0CE41	Heme-responsive zinc finger transcription factor HAP1	HAP1	sp|P0CE41|HAP1_YEAST Heme-responsive zinc finger transcription factor HAP1 OS=Saccharomyces cerevisiae (strain ATCC 204508 / S288c) OX=559292 GN=HAP1 PE=1 SV=1
29.1080169677734	27.6389274597168	26.7005462646484	27.3275737762451	26.9128513336182	27.209924697876	1.46909	2.76847	-0.627028	0.647509	-0.297073	0.813902			10	10	10	18.5	18.5	18.5	52.757	0	190.33	31.3572041046919	65	10	10	8	7	6	8	27.2697255294416	26.8916854858398	23.7261924743652	22.9322185516357	22.1835594177246	22.63916015625	21.9753684997559	0.0823388915666899	0.181662877400715	0.232865334278487	P53301	P53301	Probable glycosidase CRH1	CRH1	sp|P53301|CRH1_YEAST Probable glycosidase CRH1 OS=Saccharomyces cerevisiae (strain ATCC 204508 / S288c) OX=559292 GN=CRH1 PE=1 SV=1
23.0549030303955	23.2093601226807	24.2453231811523	24.3852844238281	23.8789539337158	23.9276866912842	-0.154457	0.89847	-0.139961	0.907544	-0.0487328	0.966785			2	2	2	24.4	24.4	24.4	13.689	0	8.1411	26.9755254421144	15	2	2	2	1	2	2	23.9755254421144	22.2130889892578	20.6999855041504	22.2106533050537	19.3161716461182	21.8947830200195	18.9978847503662	0.0823842355771244	-0.114383697509766	-0.232984442077117	P19955	P19955	37S ribosomal protein YMR-31, mitochondrial	YMR31	sp|P19955|RT31_YEAST 37S ribosomal protein YMR-31, mitochondrial OS=Saccharomyces cerevisiae (strain ATCC 204508 / S288c) OX=559292 GN=YMR31 PE=1 SV=1
NaN	NaN	21.2041301727295	21.1923160552979	20.8657455444336	20.7357044219971	#VALUE!	#VALUE!	0.0118141	1.00822	0.130041	1.09432			2	2	2	4	4	4	72.105	0	5.3471	23.0473675828235	8	0	0	2	2	2	1	18.2399993464895	NaN	NaN	17.030689239502	15.8002424240112	16.5365657806396	14.5255212783813	0.0829189130596626	0.070927619934082	0.24960037704828	P39723	P39723	Spindle pole component SPC72	SPC72	sp|P39723|SPC72_YEAST Spindle pole component SPC72 OS=Saccharomyces cerevisiae (strain ATCC 204508 / S288c) OX=559292 GN=SPC72 PE=1 SV=2
27.3886203765869	26.847448348999	28.9245357513428	28.9185771942139	29.0227394104004	28.9545459747314	0.541172	1.45515	0.00595856	1.00414	0.0681934	1.0484			18	18	18	64.9	64.9	64.9	44.596	0	158.48	31.1654877779112	92	5	8	16	14	16	17	26.9175243239317	23.2810745239258	21.4178714752197	25.3467864990234	24.1666069030762	24.8030681610107	24.4546279907227	0.0829641427535698	0.205108006795246	0.234506982330904	P16622	P16622	Ferrochelatase, mitochondrial	HEM15	sp|P16622|HEMH_YEAST Ferrochelatase, mitochondrial OS=Saccharomyces cerevisiae (strain ATCC 204508 / S288c) OX=559292 GN=HEM15 PE=1 SV=1
29.1220855712891	29.1499137878418	27.390754699707	27.1097850799561	27.4526195526123	27.0754108428955	-0.0278282	0.980896	0.28097	1.21501	0.377209	1.29883			17	17	17	47.1	47.1	47.1	53.134	0	257.28	31.5663796194959	108	14	14	11	12	13	10	27.1740758069835	26.4726810455322	24.6985340118408	23.5896663665771	21.8924884796143	23.4105396270752	21.7011280059814	0.0835740131790405	0.210116704305012	0.236106721051103	P23180	P23180	Probable oxidoreductase AIM17	AIM17	sp|P23180|AIM17_YEAST Probable oxidoreductase AIM17 OS=Saccharomyces cerevisiae (strain ATCC 204508 / S288c) OX=559292 GN=AIM17 PE=1 SV=2
NaN	NaN	23.3429946899414	23.0055084228516	23.1227207183838	23.6274509429932	#VALUE!	#VALUE!	0.337486	1.26355	-0.50473	0.704792			3	3	3	7.7	7.7	7.7	63.729	0	9.5987	25.3153419712826	11	0	0	3	3	3	2	21.1453824155119	NaN	NaN	19.7537517547607	18.1842746734619	19.6030788421631	18.3805541992188	0.084296462482573	-0.0836219787597656	-0.253477596604433	P12630	P12630	Barrierpepsin	BAR1	sp|P12630|BAR1_YEAST Barrierpepsin OS=Saccharomyces cerevisiae (strain ATCC 204508 / S288c) OX=559292 GN=BAR1 PE=1 SV=1
NaN	NaN	21.5555763244629	21.2005424499512	20.6312084197998	21.2215805053711	#VALUE!	#VALUE!	0.355034	1.27902	-0.590372	0.664172			2	2	2	13.9	13.9	13.9	23.06	0	3.2416	23.8182162586546	8	2	1	1	1	1	1	20.4962881637673	18.4149742126465	17.4778537750244	18.7646770477295	17.1354084014893	17.5862236022949	17.295804977417	0.0846699899852158	-0.117669105529785	-0.254527750377148	Q02196	Q02196	Adenylyl-sulfate kinase	MET14	sp|Q02196|KAPS_YEAST Adenylyl-sulfate kinase OS=Saccharomyces cerevisiae (strain ATCC 204508 / S288c) OX=559292 GN=MET14 PE=1 SV=1
24.1369609832764	22.9293117523193	21.58815574646	22.0188961029053	21.5623474121094	21.6693420410156	1.20765	2.30961	-0.43074	0.741881	-0.106995	0.92852			7	7	7	26.6	26.6	26.6	50.873	0	10.483	26.2478410488378	9	2	6	1	2	2	2	21.5474085724873	21.197244644165	17.6232089996338	16.5282249450684	17.5012149810791	16.84303855896	15.8977508544922	0.0848218134990526	0.223304748535156	0.239375128898905	P36075	P36075	Ubiquitin-binding protein CUE2	CUE2	sp|P36075|CUE2_YEAST Ubiquitin-binding protein CUE2 OS=Saccharomyces cerevisiae (strain ATCC 204508 / S288c) OX=559292 GN=CUE2 PE=1 SV=1
29.9453105926514	30.2180099487305	29.7112884521484	29.4956226348877	29.6842498779297	29.433723449707	-0.272699	0.827769	0.215666	1.16124	0.250526	1.18964			50	48	48	61.4	59.5	59.5	106.22	0	315.46	32.8330766002574	257	40	36	37	32	37	36	27.0781627004212	25.4139652252197	23.7784633636475	23.8707008361816	22.0536441802979	25.7944660186768	22.1663761138916	0.0863427980911327	0.0644976298014335	0.243350668705018	P09440	P09440	C-1-tetrahydrofolate synthase, mitochondrial;Methylenetetrahydrofolate dehydrogenase;Methenyltetrahydrofolate cyclohydrolase;Formyltetrahydrofolate synthetase	MIS1	sp|P09440|C1TM_YEAST C-1-tetrahydrofolate synthase, mitochondrial OS=Saccharomyces cerevisiae (strain ATCC 204508 / S288c) OX=559292 GN=MIS1 PE=1 SV=1
26.6313152313232	26.9139919281006	25.8493099212646	25.9269847869873	25.7996387481689	25.7684764862061	-0.282677	0.822064	-0.0776749	0.947584	0.0311623	1.02184			17	17	17	31.9	31.9	31.9	91.81	0	52.041	29.4508706442884	54	15	15	8	9	7	6	24.6959890400526	23.7835674285889	22.2552547454834	21.6176433563232	20.1096782684326	21.0861511230469	20.1429538726807	0.086890195413159	-0.109729766845703	-0.244779201309832	P11792	P11792	Serine/threonine-protein kinase SCH9	SCH9	sp|P11792|SCH9_YEAST Serine/threonine-protein kinase SCH9 OS=Saccharomyces cerevisiae (strain ATCC 204508 / S288c) OX=559292 GN=SCH9 PE=1 SV=3
26.1131477355957	23.2061138153076	23.7341747283936	26.0225067138672	24.6244983673096	26.1114978790283	2.90703	7.50075	-2.28833	0.204712	-1.487	0.356754			7	7	7	44.8	44.8	44.8	26.139	0	31.368	28.0300744524082	18	2	3	3	6	3	5	25.0300639252069	23.6334495544434	20.1247730255127	21.2709331512451	22.1628170013428	21.233039855957	23.3120212554932	0.0871085914929438	-0.289432525634766	-0.245348814530942	P53281	P53281	LAS seventeen-binding protein 1	LSB1	sp|P53281|LSB1_YEAST LAS seventeen-binding protein 1 OS=Saccharomyces cerevisiae (strain ATCC 204508 / S288c) OX=559292 GN=LSB1 PE=1 SV=1
27.0723476409912	26.1385822296143	25.0825748443604	26.3861560821533	26.9711456298828	27.1285877227783	0.933765	1.91026	-1.30358	0.405119	-0.157442	0.896613			4	4	4	36.8	36.8	36.8	13.943	0	9.4989	29.666718381438	17	2	2	3	3	3	1	26.8593465314065	25.7164916992188	23.3263568878174	23.1826667785645	23.0665607452393	24.7120895385742	23.2972602844238	0.0876625707310085	-0.175752639770508	-0.246792839855865	P32463	P32463	Acyl carrier protein, mitochondrial	ACP1	sp|P32463|ACPM_YEAST Acyl carrier protein, mitochondrial OS=Saccharomyces cerevisiae (strain ATCC 204508 / S288c) OX=559292 GN=ACP1 PE=1 SV=1
26.4512672424316	26.7899227142334	27.0745944976807	26.9371929168701	27.2497043609619	26.8662033081055	-0.338655	0.790778	0.137402	1.09992	0.383501	1.3045			18	18	18	60.6	60.6	60.6	48.574	0	159.04	29.7363126862967	87	12	11	16	15	17	11	25.15135663783	22.4719924926758	21.6681728363037	23.2994995117188	21.9636688232422	23.4446811676025	21.1232566833496	0.0877235828435621	0.0607490539550781	0.246951802637942	P40564	P40564	DnaJ-like protein 1	DJP1	sp|P40564|DJP1_YEAST DnaJ-like protein 1 OS=Saccharomyces cerevisiae (strain ATCC 204508 / S288c) OX=559292 GN=DJP1 PE=1 SV=1
22.2177696228027	NaN	22.6482963562012	22.8945808410645	23.0781097412109	22.5749397277832	#VALUE!	#VALUE!	-0.246284	0.843065	0.50317	1.41732			5	5	5	12	12	12	102.73	0	30.395	25.6520933006273	13	0	3	2	1	4	1	20.2258805300553	18.93994140625	NaN	17.2676467895508	15.3019609451294	18.8988838195801	15.1497869491577	0.0881636116524332	-0.086701711018879	-0.253481430344338	P32917	P32917	Protein STE5	STE5	sp|P32917|STE5_YEAST Protein STE5 OS=Saccharomyces cerevisiae (strain ATCC 204508 / S288c) OX=559292 GN=STE5 PE=1 SV=2
26.3248481750488	26.2777805328369	25.0864276885986	25.5926342010498	25.2878189086914	25.199254989624	0.0470676	1.03316	-0.506207	0.704071	0.0885639	1.06331			10	10	10	26	26	26	56.237	0	16.444	28.6135097064159	25	7	8	4	5	6	7	23.8061688353738	22.3435916900635	20.5094928741455	21.1565971374512	20.4323711395264	21.1481170654297	20.7605247497559	0.0884317877260811	-0.123524983723957	-0.248795910357247	P48360	P48360	Probable NADPH:adrenodoxin oxidoreductase, mitochondrial	ARH1	sp|P48360|ADRO_YEAST Probable NADPH:adrenodoxin oxidoreductase, mitochondrial OS=Saccharomyces cerevisiae (strain ATCC 204508 / S288c) OX=559292 GN=ARH1 PE=1 SV=1
23.4755592346191	23.645923614502	24.0994892120361	23.9917888641357	24.3006858825684	24.5017280578613	-0.170364	0.888618	0.1077	1.07751	-0.201042	0.869922			5	5	5	26.5	26.5	26.5	26.894	0	13.604	26.776807694963	18	3	3	5	5	5	4	23.0763817788479	20.4190540313721	19.0599937438965	21.2761135101318	19.8592071533203	21.0780925750732	20.1847114562988	0.0889518166778646	-0.0879020690917969	-0.25014877151107	Q06630	Q06630	Mitochondrial homologous recombination protein 1	MHR1	sp|Q06630|MHR1_YEAST Mitochondrial homologous recombination protein 1 OS=Saccharomyces cerevisiae (strain ATCC 204508 / S288c) OX=559292 GN=MHR1 PE=1 SV=1
25.7469654083252	23.5919494628906	21.8503360748291	22.9964160919189	22.8020915985107	22.899585723877	2.15502	4.45374	-1.14608	0.451851	-0.0974941	0.934655			8	8	8	33.7	33.7	33.7	47.96	0	52.365	27.7761174252536	21	4	8	3	2	3	3	23.3837686187304	23.1533679962158	19.0721111297607	17.6214942932129	15.3613615036011	18.9380741119385	18.2804355621338	0.0907156819900796	0.303813934326172	0.254729639284712	P40463	P40463	Protein VHS2	VHS2	sp|P40463|VHS2_YEAST Protein VHS2 OS=Saccharomyces cerevisiae (strain ATCC 204508 / S288c) OX=559292 GN=VHS2 PE=1 SV=1
29.2750644683838	29.3650283813477	29.6204833984375	29.596887588501	29.6970539093018	29.7635726928711	-0.0899639	0.939546	0.0235958	1.01649	-0.0665188	0.954939			46	46	46	48.5	48.5	48.5	138.72	0	323.31	32.4660903201282	317	36	40	39	38	39	40	26.9742129067327	25.2490901947021	23.8905048370361	24.7327785491943	23.3699951171875	24.5412044525146	23.662425994873	0.0907756122195573	-0.0442956288655587	-0.254885069898321	P38968	P38968	Protein transport protein SEC31	SEC31	sp|P38968|SEC31_YEAST Protein transport protein SEC31 OS=Saccharomyces cerevisiae (strain ATCC 204508 / S288c) OX=559292 GN=SEC31 PE=1 SV=3
21.2325115203857	22.1822566986084	22.4794864654541	22.4071979522705	23.3237476348877	21.9678249359131	-0.949745	0.517724	0.0722885	1.05138	1.35592	2.55961			7	7	7	26.7	26.7	26.7	45.055	0	10.025	25.2811461588622	13	1	1	5	3	6	2	20.7575983558239	18.162410736084	16.3924007415771	18.9404277801514	17.237621307373	19.3417797088623	16.121898651123	0.0916023332505961	0.159488677978516	0.257027778860835	P53266	P53266	Cytochrome oxidase assembly protein SHY1	SHY1	sp|P53266|SHY1_YEAST Cytochrome oxidase assembly protein SHY1 OS=Saccharomyces cerevisiae (strain ATCC 204508 / S288c) OX=559292 GN=SHY1 PE=1 SV=1
24.137508392334	23.6835670471191	21.7867202758789	NaN	22.9961585998535	21.6528091430664	0.453941	1.36978	#VALUE!	#VALUE!	1.34335	2.5374			6	6	6	19.3	19.3	19.3	36.501	0	11.214	26.4506701003993	13	5	5	2	0	1	1	22.7502351012582	22.217414855957	20.1873722076416	18.2054786682129	NaN	19.11110496521	16.8252563476563	0.0919918749653861	0.305274327596027	0.263665920208514	P38884	P38884	Altered inheritance of mitochondria protein 18, mitochondrial	AIM18	sp|P38884|AIM18_YEAST Altered inheritance of mitochondria protein 18, mitochondrial OS=Saccharomyces cerevisiae (strain ATCC 204508 / S288c) OX=559292 GN=AIM18 PE=1 SV=1
23.2178440093994	23.7875576019287	23.1569061279297	22.8059520721436	23.1908416748047	23.1943168640137	-0.569714	0.673751	0.350954	1.2754	-0.00347519	0.997594			12	12	12	29.3	29.3	29.3	59.765	0	20.44	26.3840322209677	21	6	6	5	3	5	4	21.5766707094412	20.3775062561035	19.3855133056641	18.805492401123	17.0526103973389	18.543363571167	16.6734199523926	0.0923842766409718	-0.0740782419840471	-0.259052014749691	P47084	P47084	Uncharacterized protein YJR003C, mitochondrial		sp|P47084|MRX12_YEAST MIOREX complex component 12 OS=Saccharomyces cerevisiae (strain ATCC 204508 / S288c) OX=559292 GN=MRX12 PE=1 SV=2
25.3980331420898	25.8606491088867	26.1129093170166	26.2635059356689	26.4556789398193	26.1058349609375	-0.462616	0.725669	-0.150597	0.900878	0.349844	1.27442			15	15	15	59	59	59	54.182	0	84.762	28.8976990592531	63	8	10	14	9	14	11	24.0397584493288	21.4604396820068	20.4235763549805	22.3744583129883	20.3854293823242	22.122594833374	20.5918579101563	0.0941973371988747	-0.0877895355224609	-0.263736547944668	P47045	P47045	Mitochondrial import inner membrane translocase subunit TIM54	TIM54	sp|P47045|TIM54_YEAST Mitochondrial import inner membrane translocase subunit TIM54 OS=Saccharomyces cerevisiae (strain ATCC 204508 / S288c) OX=559292 GN=TIM54 PE=1 SV=1
26.9934520721436	25.8971920013428	27.19065284729	27.6823081970215	27.3478164672852	27.494649887085	1.09626	2.138	-0.491655	0.711209	-0.146833	0.903231			18	2	0	55.9	4.8	0	49.056	0	17.912	30.1543634721923	27	2	2	2	2	2	2	26.3469554290046	24.9343605041504	22.3092193603516	23.9486885070801	23.068416595459	23.8663673400879	22.8979244232178	0.0947319673269443	0.152590433756512	0.26511552890945	Q12085;P0CX76;P0CX75;P0CX74;Q12485	Q12085;P0CX76;P0CX75;P0CX74;Q12485	Transposon Ty1-GR1 Gag polyprotein;Capsid protein;Gag-p4;Transposon Ty1-ML2 Gag polyprotein;Capsid protein;Gag-p4;Transposon Ty1-LR3 Gag polyprotein;Capsid protein;Gag-p4;Transposon Ty1-JR1 Gag polyprotein;Capsid protein;Gag-p4;Transposon Ty1-GR2 Gag polyprotein;Capsid protein;Gag-p4	TY1A-GR1;TY1A-ML2;TY1A-LR3;TY1A-JR1;TY1A-GR2	sp|Q12085|YG11A_YEAST Transposon Ty1-GR1 Gag polyprotein OS=Saccharomyces cerevisiae (strain ATCC 204508 / S288c) OX=559292 GN=TY1A-GR1 PE=2 SV=1;sp|P0CX76|YM12A_YEAST Transposon Ty1-ML2 Gag polyprotein OS=Saccharomyces cerevisiae (strain ATCC 204508 / S28
24.5563716888428	23.8206520080566	23.6036548614502	24.0099220275879	23.7573547363281	23.8435478210449	0.73572	1.66523	-0.406267	0.754573	-0.0861931	0.942005			10	10	10	9.3	9.3	9.3	147.94	0	32.391	27.2032183417814	24	5	2	7	7	6	7	21.7437381718857	20.9241924285889	18.1900272369385	18.887149810791	17.7682361602783	18.1482772827148	17.7753276824951	0.0962979659283654	0.0810864766438826	0.269148545790021	P09547	P09547	SWI/SNF chromatin-remodeling complex subunit SWI1	SWI1	sp|P09547|SWI1_YEAST SWI/SNF chromatin-remodeling complex subunit SWI1 OS=Saccharomyces cerevisiae (strain ATCC 204508 / S288c) OX=559292 GN=SWI1 PE=1 SV=1
23.6153774261475	23.6589450836182	24.6977920532227	24.4600143432617	24.8586120605469	24.651517868042	-0.0435677	0.970253	0.237778	1.17917	0.207094	1.15436			8	8	8	34.2	34.2	34.2	27.635	0	16.113	27.2768407404159	24	4	7	7	7	7	6	23.9549126455285	22.0305614471436	19.0354747772217	21.938081741333	20.5974159240723	22.0024394989014	20.6398887634277	0.0967665016884445	0.133768081665039	0.270353411216948	Q03246	Q03246	37S ribosomal protein S17, mitochondrial	MRPS17	sp|Q03246|RT17_YEAST 37S ribosomal protein S17, mitochondrial OS=Saccharomyces cerevisiae (strain ATCC 204508 / S288c) OX=559292 GN=MRPS17 PE=1 SV=1
28.1937580108643	28.2175712585449	27.9634494781494	27.9396057128906	27.9121646881104	28.009880065918	-0.0238132	0.983629	0.0238438	1.01666	-0.0977154	0.934512			23	21	21	53.5	51.7	51.7	56.692	0	196.88	30.9831853776612	125	14	14	18	18	18	17	26.0762879852071	24.5296363830566	23.3138198852539	23.6410789489746	22.3776664733887	23.389820098877	22.6505107879639	0.0969285013031394	-0.0325616200764998	-0.270769811701758	P40047	P40047	Aldehyde dehydrogenase 5, mitochondrial	ALD5	sp|P40047|ALDH5_YEAST Aldehyde dehydrogenase 5, mitochondrial OS=Saccharomyces cerevisiae (strain ATCC 204508 / S288c) OX=559292 GN=ALD5 PE=1 SV=4
23.1097087860107	22.4996490478516	21.7209644317627	22.552038192749	22.3317794799805	22.4388313293457	0.61006	1.52632	-0.831074	0.562111	-0.107052	0.928483			4	4	4	17.4	17.4	17.4	42.692	0	25.479	25.4295959933264	14	2	3	2	3	3	3	21.1816812490165	19.9125881195068	17.8509311676025	18.0112705230713	17.9733715057373	18.528636932373	17.9632453918457	0.0971053549541858	-0.109355290730793	-0.271224281162563	P14681	P14681	Mitogen-activated protein kinase KSS1	KSS1	sp|P14681|KSS1_YEAST Mitogen-activated protein kinase KSS1 OS=Saccharomyces cerevisiae (strain ATCC 204508 / S288c) OX=559292 GN=KSS1 PE=1 SV=1
25.9467487335205	26.4367771148682	25.7999839782715	25.8159465789795	25.7890777587891	25.5100536346436	-0.490028	0.712011	-0.0159626	0.988997	0.279024	1.21337			12	12	12	57.1	57.1	57.1	37.209	0	57.549	28.992426592472	48	9	9	11	9	12	10	24.8225015910297	23.5439205169678	22.2929153442383	22.2058010101318	20.6368827819824	22.0480327606201	20.5134506225586	0.0977218837965383	-0.0756556193033866	-0.272807696790111	P08466	P08466	Mitochondrial nuclease	NUC1	sp|P08466|NUC1_YEAST Mitochondrial nuclease OS=Saccharomyces cerevisiae (strain ATCC 204508 / S288c) OX=559292 GN=NUC1 PE=1 SV=1
25.7457084655762	25.572826385498	26.8901786804199	26.7165966033936	26.96653175354	26.8470897674561	0.172882	1.12731	0.173582	1.12786	0.119442	1.08631			7	7	7	59.3	59.3	59.3	16.931	0	51.301	29.4397793115421	32	4	4	7	6	6	5	26.2698503477894	23.3356533050537	21.6985874176025	24.9254684448242	22.1333599090576	24.5474548339844	22.5011329650879	0.098442312536443	0.155302047729492	0.274656172106679	Q02784	Q02784	Monothiol glutaredoxin-5, mitochondrial	GRX5	sp|Q02784|GLRX5_YEAST Monothiol glutaredoxin-5, mitochondrial OS=Saccharomyces cerevisiae (strain ATCC 204508 / S288c) OX=559292 GN=GRX5 PE=1 SV=1
22.727087020874	23.3334712982178	23.1882915496826	23.390869140625	23.740571975708	23.1786613464355	-0.606384	0.656841	-0.202578	0.868997	0.561911	1.47622			6	6	6	33.7	33.7	33.7	19.935	0	33.345	26.1913683158913	19	3	3	6	4	5	4	23.0214395489927	20.8945980072021	19.0291519165039	21.1606025695801	19.3719043731689	21.1839237213135	19.253381729126	0.0984756416164244	-0.0823504130045585	-0.274741641426358	Q03772	Q03772	Pre-mRNA-splicing factor CWC15	CWC15	sp|Q03772|CWC15_YEAST Pre-mRNA-splicing factor CWC15 OS=Saccharomyces cerevisiae (strain ATCC 204508 / S288c) OX=559292 GN=CWC15 PE=1 SV=1
30.5285968780518	30.8112277984619	30.0971031188965	30.4506149291992	30.9023208618164	30.4810638427734	-0.282631	0.82209	-0.353512	0.782677	0.421257	1.33909			5	5	5	27.4	27.4	27.4	37.718	0	4.3304	33.3047056051263	11	3	2	2	2	1	4	29.7197648602455	19.270637512207	19.1129131317139	28.6829452514648	25.514575958252	28.0809593200684	26.8403816223145	0.098883908618396	-0.0716285705566406	-0.275788271890718	Q05937	Q05937	Zinc finger protein STP3	STP3	sp|Q05937|STP3_YEAST Zinc finger protein STP3 OS=Saccharomyces cerevisiae (strain ATCC 204508 / S288c) OX=559292 GN=STP3 PE=1 SV=1
26.2322788238525	26.4640731811523	28.1298656463623	28.0783157348633	27.7039813995361	28.1917362213135	-0.231794	0.851575	0.0515499	1.03638	-0.487755	0.713134			14	14	14	59.2	59.2	59.2	38.887	0	189.92	30.2102503268835	46	6	6	10	12	11	11	26.040281191445	22.1698055267334	20.2971496582031	24.5365886688232	23.3784866333008	23.6729278564453	23.778263092041	0.0997287898757765	-0.222666422526043	-0.277952257667295	P36047	P36047	Protein phosphatase 1 regulatory subunit SDS22	SDS22	sp|P36047|SDS22_YEAST Protein phosphatase 1 regulatory subunit SDS22 OS=Saccharomyces cerevisiae (strain ATCC 204508 / S288c) OX=559292 GN=SDS22 PE=1 SV=1
25.8396377563477	26.3367786407471	26.330961227417	25.972110748291	26.4416923522949	26.1255168914795	-0.497141	0.70851	0.35885	1.2824	0.316175	1.24503			7	7	7	32.4	32.4	32.4	19.411	0	16.665	29.1602670302237	40	6	5	7	6	7	6	26.3529265362467	24.6149272918701	23.7436561584473	24.2179317474365	22.203950881958	23.9294033050537	22.4290523529053	0.0998537572858599	0.0592950185139962	0.278272113273075	P53633	P53633	Prenylated Rab acceptor 1	YIP3	sp|P53633|PRA1_YEAST Prenylated Rab acceptor 1 OS=Saccharomyces cerevisiae (strain ATCC 204508 / S288c) OX=559292 GN=YIP3 PE=1 SV=2
21.7192516326904	22.23268699646	21.2071723937988	NaN	NaN	21.070972442627	-0.513435	0.700552	#VALUE!	#VALUE!	#VALUE!	#VALUE!			3	3	3	25.6	25.6	25.6	15.169	0	5.19	24.2890501968579	7	3	2	1	0	0	1	21.119082967517	20.1745071411133	19.553337097168	17.9006538391113	NaN	NaN	16.2896041870117	0.099970486552213	-0.188617706298828	-0.297136559823096	P38877	P38877	Chromosome transmission fidelity protein 8	CTF8	sp|P38877|CTF8_YEAST Chromosome transmission fidelity protein 8 OS=Saccharomyces cerevisiae (strain ATCC 204508 / S288c) OX=559292 GN=CTF8 PE=1 SV=1
30.8127593994141	30.7443885803223	31.4455432891846	31.3759632110596	31.4917106628418	31.3743572235107	0.0683708	1.04853	0.0695801	1.04941	0.117353	1.08474			30	30	30	62.9	62.9	62.9	62.86	0	323.31	34.0862284794572	298	25	24	25	23	25	23	29.2788577365536	27.2700824737549	25.865873336792	27.1803493499756	25.9604034423828	27.0102005004883	26.1757888793945	0.100644397944441	0.0851014455159529	0.280294445391762	P39522	P39522	Dihydroxy-acid dehydratase, mitochondrial	ILV3	sp|P39522|ILV3_YEAST Dihydroxy-acid dehydratase, mitochondrial OS=Saccharomyces cerevisiae (strain ATCC 204508 / S288c) OX=559292 GN=ILV3 PE=1 SV=2
25.7543754577637	25.4084358215332	27.4853134155273	27.1403388977051	27.1569213867188	27.1775016784668	0.34594	1.27098	0.344975	1.27013	-0.0205803	0.985836			7	7	7	32	32	32	30.132	0	87.093	29.7976265259936	30	5	6	6	5	6	6	26.4756984311062	24.2519092559814	21.4880714416504	25.1756572723389	22.4316558837891	24.0534954071045	23.1696071624756	0.101800589691568	0.22344462076823	0.283247704114463	P40513	P40513	Mitochondrial acidic protein MAM33	MAM33	sp|P40513|MAM33_YEAST Mitochondrial acidic protein MAM33 OS=Saccharomyces cerevisiae (strain ATCC 204508 / S288c) OX=559292 GN=MAM33 PE=1 SV=1
24.0869941711426	24.2969818115234	22.9216156005859	22.6911296844482	22.7661991119385	NaN	-0.209988	0.864545	0.230486	1.17323	#VALUE!	#VALUE!			3	3	3	35.1	35.1	35.1	8.5928	0	3.3446	26.4890858803588	8	2	2	2	3	2	1	24.1671424686928	23.2422580718994	21.7139778137207	21.264533996582	20.4424285888672	20.5467014312744	NaN	0.103124790848431	-0.235786120096844	-0.292980877889214	P37299	P37299	Cytochrome b-c1 complex subunit 10	QCR10	sp|P37299|QCR10_YEAST Cytochrome b-c1 complex subunit 10, mitochondrial OS=Saccharomyces cerevisiae (strain ATCC 204508 / S288c) OX=559292 GN=QCR10 PE=1 SV=2
25.9749794006348	26.3633918762207	26.4311904907227	26.4541416168213	26.6647872924805	26.4304103851318	-0.388412	0.76397	-0.0229511	0.984217	0.234377	1.1764			13	13	13	29.5	29.5	29.5	59.661	0	71.2	29.2370147599227	45	8	9	9	9	9	8	24.4296917590749	21.8079376220703	20.6302318572998	22.9277954101563	20.8629493713379	22.3906059265137	20.8713970184326	0.103927476706645	-0.0589955647786446	-0.288667808366686	Q00362	Q00362	Protein phosphatase PP2A regulatory subunit B	CDC55	sp|Q00362|2ABA_YEAST Protein phosphatase PP2A regulatory subunit B OS=Saccharomyces cerevisiae (strain ATCC 204508 / S288c) OX=559292 GN=CDC55 PE=1 SV=2
23.1128463745117	22.9544162750244	22.6470222473145	22.6437892913818	22.5799655914307	22.5599918365479	0.15843	1.11607	0.00323296	1.00224	0.0199738	1.01394			4	4	4	24.6	24.6	24.6	22.392	0	7.5708	26.0803603491122	11	3	4	2	3	2	1	22.7584322542248	22.0130443572998	19.6929569244385	19.6100730895996	18.7723331451416	19.1881923675537	17.3750896453857	0.105939020941406	0.0605456034342424	0.293779111206367	P22354	P22354	54S ribosomal protein L20, mitochondrial	MRPL20	sp|P22354|RM20_YEAST 54S ribosomal protein L20, mitochondrial OS=Saccharomyces cerevisiae (strain ATCC 204508 / S288c) OX=559292 GN=MRPL20 PE=1 SV=2
NaN	NaN	21.1352081298828	20.8509464263916	20.6696014404297	20.8061695098877	#VALUE!	#VALUE!	0.284262	1.21779	-0.136568	0.909681			2	2	2	5.5	5.5	5.5	45.304	0	4.1358	25.281712171342	5	1	1	1	1	1	1	21.0338235630993	20.0910682678223	19.2546730041504	17.4183139801025	15.8598985671997	16.6985969543457	15.9544458389282	0.106739902269443	0.0738468170166016	0.315750113378293	P53272	P53272	Uncharacterized protein YGR122W		sp|P53272|YG34_YEAST Uncharacterized protein YGR122W OS=Saccharomyces cerevisiae (strain ATCC 204508 / S288c) OX=559292 GN=YGR122W PE=4 SV=1
23.3920497894287	23.5581245422363	22.3975696563721	23.080436706543	23.1544189453125	22.6581592559814	-0.166075	0.891264	-0.682867	0.622926	0.49626	1.41055			7	7	7	16	16	16	76.316	0	12.47	26.4931543797355	13	4	6	3	3	2	3	21.4931635438448	20.9059505462646	18.7857723236084	17.1336040496826	16.6069393157959	17.4161701202393	16.8308372497559	0.106909388988689	-0.117560704549152	-0.29623968640759	Q06436	Q06436	RING-finger protein MAG2	MAG2	sp|Q06436|MAG2_YEAST RING-finger protein MAG2 OS=Saccharomyces cerevisiae (strain ATCC 204508 / S288c) OX=559292 GN=MAG2 PE=1 SV=1
25.311466217041	25.4837303161621	24.7285823822021	24.3904094696045	24.713399887085	24.5262966156006	-0.172264	0.887449	0.338173	1.26415	0.187103	1.13848			19	19	19	32.7	32.7	32.7	72.388	0	33.852	28.020939597401	48	13	13	9	6	8	7	22.6990115025137	21.5161952972412	20.2352619171143	20.2152538299561	18.1661930084229	19.1710891723633	18.8534622192383	0.107154417224082	0.11767069498698	0.296860484666588	P32191	P32191	Glycerol-3-phosphate dehydrogenase, mitochondrial	GUT2	sp|P32191|GPDM_YEAST Glycerol-3-phosphate dehydrogenase, mitochondrial OS=Saccharomyces cerevisiae (strain ATCC 204508 / S288c) OX=559292 GN=GUT2 PE=1 SV=2
25.6118087768555	26.0204524993896	27.7345371246338	27.017333984375	28.1247978210449	27.6214962005615	-0.408644	0.753331	0.717203	1.64399	0.503302	1.41745			7	7	7	44.8	44.8	44.8	20.317	0	79.228	30.0324936703811	44	4	3	6	6	6	6	26.7105655754937	23.6227684020996	22.7903251647949	24.9317493438721	22.9566860198975	25.0839138031006	23.7331409454346	0.107402027345079	0.270620346069336	0.29748761068532	P35180	P35180	Mitochondrial import receptor subunit TOM20	TOM20	sp|P35180|TOM20_YEAST Mitochondrial import receptor subunit TOM20 OS=Saccharomyces cerevisiae (strain ATCC 204508 / S288c) OX=559292 GN=TOM20 PE=1 SV=1
27.8476867675781	28.0249061584473	25.9994659423828	26.1172771453857	26.082311630249	26.5339183807373	-0.177219	0.884406	-0.117811	0.921585	-0.451607	0.731228			2	2	2	45.2	45.2	45.2	11.518	0	46.558	30.3080195866439	12	2	2	2	2	2	1	29.3079761738177	28.4516372680664	27.4444274902344	25.5129795074463	24.227071762085	25.2920379638672	22.5810222625732	0.107510706431291	-0.248879114786781	-0.297762796163995	P35195	P35195	UPF0045 protein ECM15	ECM15	sp|P35195|ECM15_YEAST UPF0045 protein ECM15 OS=Saccharomyces cerevisiae (strain ATCC 204508 / S288c) OX=559292 GN=ECM15 PE=1 SV=1
28.0479125976563	28.2449054718018	26.1583461761475	26.3113975524902	26.0101566314697	26.4665641784668	-0.196993	0.872367	-0.153051	0.899346	-0.456408	0.728799			21	21	21	52.8	52.8	52.8	47.848	0	68.687	30.5339890740414	84	21	17	12	14	13	13	25.7791145632201	25.0785503387451	23.6604690551758	21.5524368286133	20.8569602966309	20.97239112854	20.8267154693604	0.10751325992602	-0.268817265828453	-0.297769261351827	Q04728	Q04728	Arginine biosynthesis bifunctional protein ArgJ, mitochondrial;Glutamate N-acetyltransferase;Amino-acid acetyltransferase;Arginine biosynthesis bifunctional protein ArgJ alpha chain;Arginine biosynthesis bifunctional protein ArgJ beta chain	ARG7	sp|Q04728|ARGJ_YEAST Arginine biosynthesis bifunctional protein ArgJ, mitochondrial OS=Saccharomyces cerevisiae (strain ATCC 204508 / S288c) OX=559292 GN=ARG7 PE=1 SV=1
22.2805652618408	22.482837677002	21.8194065093994	21.7072505950928	20.7654705047607	21.2025165557861	-0.202272	0.86918	0.112156	1.08084	-0.437046	0.738645			4	4	4	5.2	5.2	5.2	77.756	0.0010428	2.3299	24.8990138821048	6	2	3	2	2	2	2	20.2552268603504	19.2385540008545	17.6291999816895	17.0476131439209	16.616548538208	16.6159744262695	16.5171165466309	0.108986238751692	-0.175720850626629	-0.301494905518007	P38738	P38738	Oxidant-induced cell-cycle arrest protein 5	OCA5	sp|P38738|OCA5_YEAST Oxidant-induced cell-cycle arrest protein 5 OS=Saccharomyces cerevisiae (strain ATCC 204508 / S288c) OX=559292 GN=OCA5 PE=1 SV=1
31.1559925079346	30.6716022491455	30.2088565826416	30.3136520385742	30.1138381958008	30.1611080169678	0.48439	1.39899	-0.104795	0.929937	-0.0472698	0.967766			19	19	19	59.9	59.9	59.9	32.989	0	323.31	33.5808247468415	206	17	17	16	16	16	16	29.7734316458608	28.6486625671387	27.1660499572754	26.8719711303711	25.7976608276367	26.5793151855469	25.9505805969238	0.109624044708118	0.110774993896484	0.303105788404028	P10080	P10080	Single-stranded nucleic acid-binding protein	SBP1	sp|P10080|SSBP1_YEAST Single-stranded nucleic acid-binding protein OS=Saccharomyces cerevisiae (strain ATCC 204508 / S288c) OX=559292 GN=SBP1 PE=1 SV=2
24.4958248138428	24.7789649963379	25.036449432373	24.575252532959	24.536470413208	24.5426826477051	-0.28314	0.8218	0.461197	1.37668	-0.00621223	0.995703			9	9	9	21.1	21.1	21.1	61.906	0	20.275	27.7087252353287	25	8	7	6	6	7	5	23.1237627346075	21.6504459381104	20.3676242828369	20.91721534729	18.9910907745361	20.4616394042969	19.0694122314453	0.109676334890216	0.057281494140625	0.303237793417665	Q00684	Q00684	Tyrosine-protein phosphatase CDC14	CDC14	sp|Q00684|CDC14_YEAST Tyrosine-protein phosphatase CDC14 OS=Saccharomyces cerevisiae (strain ATCC 204508 / S288c) OX=559292 GN=CDC14 PE=1 SV=2
26.6207275390625	26.5383815765381	24.6814785003662	24.0301895141602	24.8373050689697	24.6836204528809	0.082346	1.05874	0.651289	1.57057	0.153685	1.11241			15	15	15	36.4	36.4	36.4	49.361	0	35.991	29.1216401438783	38	9	12	5	3	6	5	24.7997120489909	24.3106346130371	21.959041595459	20.5084285736084	19.1660690307617	20.6585750579834	19.1586933135986	0.109679899739432	0.295773188273113	0.303246792430121	P38820	P38820	Adenylyltransferase and sulfurtransferase UBA4;Adenylyltransferase UBA4;Sulfurtransferase UBA4	UBA4	sp|P38820|UBA4_YEAST Adenylyltransferase and sulfurtransferase UBA4 OS=Saccharomyces cerevisiae (strain ATCC 204508 / S288c) OX=559292 GN=UBA4 PE=1 SV=1
28.4675045013428	28.3408317565918	28.0674324035645	28.0514945983887	28.3194561004639	28.325216293335	0.126673	1.09177	0.0159378	1.01111	-0.00576019	0.996015			8	8	8	60.1	60.1	60.1	22.963	0	49.938	31.2006367912503	55	6	7	6	7	7	7	28.0307059439554	26.3487129211426	23.0824375152588	25.7360610961914	24.0185222625732	26.0606460571289	25.1407489776611	0.11011574421977	0.0456167856852225	0.304346696667756	Q08746	Q08746	Regulator of ribosome biosynthesis	RRS1	sp|Q08746|RRS1_YEAST Regulator of ribosome biosynthesis OS=Saccharomyces cerevisiae (strain ATCC 204508 / S288c) OX=559292 GN=RRS1 PE=1 SV=1
24.428861618042	24.4443016052246	23.3053550720215	23.2552261352539	23.0893878936768	22.476053237915	-0.01544	0.989355	0.0501289	1.03536	0.613335	1.52979			13	13	13	17.8	17.8	17.8	119.55	0	8.5519	26.9123936213384	28	8	9	6	3	5	3	21.1574604310145	20.2268218994141	19.2130241394043	17.6005229949951	15.7103757858276	17.4542675018311	16.1400699615479	0.110578309296661	0.216007868448894	0.305513318167751	Q12494	Q12494	Inositol hexakisphosphate kinase 1	KCS1	sp|Q12494|KCS1_YEAST Inositol hexakisphosphate kinase 1 OS=Saccharomyces cerevisiae (strain ATCC 204508 / S288c) OX=559292 GN=KCS1 PE=1 SV=1
28.0955200195313	28.1472473144531	27.3262023925781	27.6367168426514	27.2803859710693	27.2569198608398	-0.0517273	0.964781	-0.310514	0.806354	0.0234661	1.0164			20	20	20	59.8	59.8	59.8	51.358	0	199.08	30.7556522018576	143	18	15	16	15	16	17	26.2962285411389	25.0714473724365	23.743143081665	23.7514419555664	22.2716178894043	23.1473712921143	22.1426429748535	0.110658184030796	-0.112925211588543	-0.305714693406949	Q12024	Q12024	Ribosome biogenesis protein YTM1	YTM1	sp|Q12024|YTM1_YEAST Ribosome biogenesis protein YTM1 OS=Saccharomyces cerevisiae (strain ATCC 204508 / S288c) OX=559292 GN=YTM1 PE=1 SV=1
23.3981952667236	25.4671230316162	25.9038715362549	24.9011325836182	25.5966491699219	25.2719173431396	-2.06893	0.238337	1.00274	2.0038	0.324732	1.25243			4	4	4	48.5	48.5	48.5	10.408	0	8.3347	28.0087581499454	18	2	1	4	3	3	3	25.4238063330447	21.6229686737061	22.6272506713867	24.0428504943848	21.7974872589111	23.2585372924805	22.0493297576904	0.110981441649346	-0.247152328491211	-0.306529447032436	Q96VH5	Q96VH5	MICOS complex subunit MIC10	MIC10	sp|Q96VH5|MIC10_YEAST MICOS complex subunit MIC10 OS=Saccharomyces cerevisiae (strain ATCC 204508 / S288c) OX=559292 GN=MIC10 PE=1 SV=1
21.5080909729004	20.7398300170898	20.5010604858398	21.701509475708	20.9544696807861	20.9052906036377	0.768261	1.70322	-1.20045	0.43514	0.0491791	1.03468			1	1	1	8.7	8.7	8.7	14.498	0.002319	2.013	24.1609257654539	3	1	1	1	1	1	1	21.1609103823677	20.0753536224365	17.8159713745117	18.02858543396	17.9037761688232	18.3790321350098	17.2469253540039	0.111179684750513	-0.127669652303059	-0.307028931126879	P40045	P40045	Topoisomerase I damage affected protein 2	TDA2	sp|P40045|TDA2_YEAST Topoisomerase I damage affected protein 2 OS=Saccharomyces cerevisiae (strain ATCC 204508 / S288c) OX=559292 GN=TDA2 PE=1 SV=1
25.7527694702148	27.9996490478516	18.1458930969238	20.548490524292	17.969217300415	17.1168518066406	-2.24688	0.210679	-2.4026	0.189124	0.852365	1.80546			9	9	9	29	29	29	31.817	0	43.637	28.6933192389103	22	9	7	2	1	1	1	24.9928695495669	23.5346908569336	24.3089694976807	18.1060009002686	16.4592876434326	15.6953916549683	14.7499217987061	0.111517498752916	-1.26570383707682	-0.307879761894722	Q03148;P53824;P43545	Q03148	Pyridoxal 5-phosphate synthase subunit SNZ1	SNZ1	sp|Q03148|SNZ1_YEAST Pyridoxal 5-phosphate synthase subunit SNZ1 OS=Saccharomyces cerevisiae (strain ATCC 204508 / S288c) OX=559292 GN=SNZ1 PE=1 SV=1
23.4902038574219	23.2136077880859	23.8782997131348	23.9920482635498	23.720775604248	24.1766834259033	0.276596	1.21133	-0.113749	0.924184	-0.455908	0.729051			9	9	9	14.1	14.1	14.1	108.78	0	45.775	26.4656924414236	25	4	2	6	6	7	8	20.9738626955303	18.6607685089111	17.8068771362305	18.6888656616211	17.6510944366455	18.6077270507813	18.5651760101318	0.112058628524112	-0.097686767578125	-0.309241859584934	P40467	P40467	Activator of stress genes 1	ASG1	sp|P40467|ASG1_YEAST Activator of stress genes 1 OS=Saccharomyces cerevisiae (strain ATCC 204508 / S288c) OX=559292 GN=ASG1 PE=1 SV=1
NaN	NaN	22.2748336791992	22.8248329162598	23.0040512084961	22.7011280059814	#VALUE!	#VALUE!	-0.549999	0.68302	0.302923	1.23364			2	2	2	22.5	22.5	22.5	15.504	0	10.149	24.6291756065389	7	0	0	2	1	2	2	21.4592895227006	NaN	NaN	19.4317188262939	17.7837905883789	20.0417976379395	19.7323303222656	0.113443601182718	-0.123538017272949	-0.334050942473518	P38345	P38345	Succinate dehydrogenase assembly factor 4, mitochondrial	SDH8	sp|P38345|SDHF4_YEAST Succinate dehydrogenase assembly factor 4, mitochondrial OS=Saccharomyces cerevisiae (strain ATCC 204508 / S288c) OX=559292 GN=SDH8 PE=1 SV=2
20.6725387573242	NaN	21.9387283325195	21.2937850952148	21.6344032287598	21.8852806091309	#VALUE!	#VALUE!	0.644943	1.56368	-0.250877	0.840385			1	1	1	13.7	13.7	13.7	8.1644	0.0018083	2.0957	24.5017886019506	4	1	1	1	1	1	1	22.5017643098613	20.318380355835	20.0574836730957	20.4937496185303	18.3563404083252	19.887357711792	19.532543182373	0.114684971689407	-0.174309412638348	-0.322971984313404	Q2V2P4	Q2V2P4	Uncharacterized protein YIL156W-B	YIL156W-B	sp|Q2V2P4|YI156_YEAST Uncharacterized protein YIL156W-B OS=Saccharomyces cerevisiae (strain ATCC 204508 / S288c) OX=559292 GN=YIL156W-B PE=3 SV=1
25.5021228790283	25.697395324707	25.552038192749	25.2282104492188	25.4663772583008	25.4644145965576	-0.195272	0.873408	0.323828	1.25165	0.00196266	1.00136			18	18	18	38.8	38.8	38.8	57.945	0	39.963	28.5291369873634	64	10	13	12	9	12	10	23.7218193081594	22.3018436431885	20.6061191558838	21.4126091003418	19.5352039337158	21.2349109649658	20.0003089904785	0.114726460217893	0.0435059865315779	0.315942648325968	P38323	P38323	Mitochondrial clpX-like chaperone MCX1	MCX1	sp|P38323|CLPX_YEAST ATP-dependent clpX-like chaperone, mitochondrial OS=Saccharomyces cerevisiae (strain ATCC 204508 / S288c) OX=559292 GN=MCX1 PE=1 SV=1
21.7764358520508	22.4526443481445	20.7815685272217	20.6298751831055	21.3134059906006	NaN	-0.676208	0.625808	0.151693	1.11087	#VALUE!	#VALUE!			1	1	1	5	5	5	26.733	0	2.7525	24.4214325819138	3	1	1	1	1	1	0	20.514509881826	19.2450008392334	18.6347408294678	17.3499202728271	15.8482074737549	17.8936214447021	NaN	0.11508406762011	-0.250789642333984	-0.323999621608915	P33751	P33751	Phenylacrylic acid decarboxylase 1, mitochondrial	PAD1	sp|P33751|PAD1_YEAST Flavin prenyltransferase PAD1, mitochondrial OS=Saccharomyces cerevisiae (strain ATCC 204508 / S288c) OX=559292 GN=PAD1 PE=1 SV=2
26.5526542663574	28.4219779968262	26.7441959381104	26.1405925750732	26.6214275360107	26.0910167694092	-1.86932	0.273702	0.603603	1.51951	0.530411	1.44434			23	23	23	28.2	28.2	28.2	111.78	0	28.099	29.8909620077077	44	11	5	11	7	10	10	24.2762550617897	22.311466217041	23.4364433288574	20.5877437591553	19.1096782684326	20.1676635742188	18.7521190643311	0.115525897110408	-0.245103200276692	-0.317945931604099	P32380	P32380	Spindle pole body component 110	SPC110	sp|P32380|SP110_YEAST Spindle pole body component 110 OS=Saccharomyces cerevisiae (strain ATCC 204508 / S288c) OX=559292 GN=SPC110 PE=1 SV=1
22.4224987030029	22.8825969696045	21.4970188140869	NaN	22.3429946899414	21.6805458068848	-0.460098	0.726937	#VALUE!	#VALUE!	0.662449	1.58277			3	2	2	27.5	18.3	18.3	17.14	0	6.2681	25.3727532271075	7	1	2	2	0	2	1	22.3727598682644	21.2360801696777	19.2448844909668	19.7213897705078	NaN	20.3585319519043	16.9970035552979	0.117232631935866	-0.194067319234211	-0.329523368487158	P00424	P00424	Cytochrome c oxidase polypeptide 5A, mitochondrial	COX5A	sp|P00424|COX5A_YEAST Cytochrome c oxidase subunit 5A, mitochondrial OS=Saccharomyces cerevisiae (strain ATCC 204508 / S288c) OX=559292 GN=COX5A PE=1 SV=1
24.362455368042	24.2179317474365	24.4455642700195	24.4849281311035	24.2508983612061	24.4543151855469	0.144524	1.10537	-0.0393639	0.973084	-0.203417	0.868491			9	9	9	27.2	27.2	27.2	66.906	0	27.599	27.04541489732	25	2	5	6	6	7	7	22.238093305497	20.2141857147217	16.7178630828857	19.7650012969971	19.3277492523193	19.9772911071777	19.9902305603027	0.117451944011853	-0.0327523549397775	-0.322763615438629	P29056	P29056	Transcription factor IIIB 70 kDa subunit	BRF1	sp|P29056|TF3B_YEAST Transcription factor IIIB 70 kDa subunit OS=Saccharomyces cerevisiae (strain ATCC 204508 / S288c) OX=559292 GN=BRF1 PE=1 SV=1
22.8668212890625	23.0024738311768	21.7881965637207	21.7291202545166	21.7783222198486	NaN	-0.135653	0.910258	0.0590763	1.0418	#VALUE!	#VALUE!			3	3	3	7.2	7.2	7.2	55.6	0.0043567	1.8485	25.4443011323385	6	3	3	1	2	1	0	20.4901301011246	19.7694149017334	18.20871925354	16.8635082244873	16.0474224090576	16.4440937042236	NaN	0.118471534547912	-0.221350351969402	-0.332701911550522	Q12259	Q12259	BTB/POZ domain-containing protein YLR108C		sp|Q12259|YL108_YEAST BTB/POZ domain-containing protein YLR108C OS=Saccharomyces cerevisiae (strain ATCC 204508 / S288c) OX=559292 GN=YLR108C PE=1 SV=1
22.423267364502	NaN	21.7889919281006	22.4493236541748	NaN	22.0283699035645	#VALUE!	#VALUE!	-0.660332	0.632733	#VALUE!	#VALUE!			2	2	2	12.1	12.1	12.1	24.802	0	2.8455	24.5648835223736	3	1	1	1	2	0	1	21.3949294551408	20.502420425415	NaN	18.7590618133545	19.1624851226807	NaN	17.8829765319824	0.118835448150967	-0.132717132568359	-0.348680368708078	P53277	P53277	Pre-mRNA-splicing factor SYF2	SYF2	sp|P53277|SYF2_YEAST Pre-mRNA-splicing factor SYF2 OS=Saccharomyces cerevisiae (strain ATCC 204508 / S288c) OX=559292 GN=SYF2 PE=1 SV=1
27.4790802001953	27.1704502105713	27.3919010162354	27.6044883728027	27.4181213378906	27.3887844085693	0.30863	1.23853	-0.212587	0.862988	0.0293369	1.02054			27	25	25	38	35.7	35.7	103.9	0	225.72	30.4719872492209	120	20	19	21	20	18	14	25.0796485147351	23.8603172302246	21.9706726074219	22.5565586090088	21.6730995178223	22.1354579925537	20.9314250946045	0.11902417180803	0.0417931874593087	0.32668720338202	P39936	P39936	Eukaryotic initiation factor 4F subunit p130	TIF4632	sp|P39936|IF4F2_YEAST Eukaryotic initiation factor 4F subunit p130 OS=Saccharomyces cerevisiae (strain ATCC 204508 / S288c) OX=559292 GN=TIF4632 PE=1 SV=1
[truncated: 3,165 more rows]
